# Supplementary material for: Cancer-Related Triplets of mRNA-lncRNA-miRNA Revealed by Integrative Network in Uterine Corpus Endometrial Carcinoma
Source: Biomed Res Int. 2017 Feb 8;2017:3859582. doi: 10.1155/2017/3859582 (PMC5320387; doi:10.1155/2017/3859582)
Supplement: Supplementary file 1 — Supplementary Material S1 Regulatory relations of the factors in constructed network. Supplementary Material S2 The triplet list for mRNA-lncRNA-miRNA cross-regulation. [file 3859582.f1.zip]

Archive with 2 entries (2 files):
- FileS2.xlsx
- FileS1.xlsx
