# Supplementary material for: Cancer-Related Triplets of mRNA-lncRNA-miRNA Revealed by Integrative Network in Uterine Corpus Endometrial Carcinoma
Source: Biomed Res Int. 2017 Feb 8;2017:3859582. doi: 10.1155/2017/3859582 (PMC5320387; doi:10.1155/2017/3859582)
Supplement: Supplementary file 1 — Supplementary Material S1 Regulatory relations of the factors in constructed network. Supplementary Material S2 The triplet list for mRNA-lncRNA-miRNA cross-regulation. [file 3859582.f1.zip › FileS1.xlsx]

## Sheet: FileS1
Target	Regulator	cor.coef	order	adj.r.squared
ENSG00000000003.9,TSPAN6,coding,chrX:99883666-99894988	ENSG00000116604.11,MEF2D,coding,chr1:156433518-156470620	-0.511277	1	0.836064
ENSG00000000003.9,TSPAN6,coding,chrX:99883666-99894988	ENSG00000018610.8,CXorf56,coding,chrX:118672111-118699397	0.452622	2	0.836064
ENSG00000000003.9,TSPAN6,coding,chrX:99883666-99894988	ENSG00000005302.12,MSL3,coding,chrX:11776277-11793870	0.42325	3	0.836064
ENSG00000000003.9,TSPAN6,coding,chrX:99883666-99894988	ENSG00000006042.5,TMEM98,coding,chr17:31254927-31268667	0.390645	4	0.836064
ENSG00000000003.9,TSPAN6,coding,chrX:99883666-99894988	ENSG00000004487.10,KDM1A,coding,chr1:23345940-23410182	0.382071	5	0.836064
ENSG00000000003.9,TSPAN6,coding,chrX:99883666-99894988	ENSG00000003096.9,KLHL13,coding,chrX:117031775-117251303	0.367748	6	0.836064
ENSG00000000003.9,TSPAN6,coding,chrX:99883666-99894988	ENSG00000126953.5,TIMM8A,coding,chrX:100600648-100604184	0.36544	7	0.836064
ENSG00000000003.9,TSPAN6,coding,chrX:99883666-99894988	ENSG00000008735.10,MAPK8IP2,coding,chr22:51039113-51052409	-0.363843	8	0.836064
ENSG00000000003.9,TSPAN6,coding,chrX:99883666-99894988	ENSG00000000419.7,DPM1,coding,chr20:49551403-49575092	0.336907	9	0.836064
ENSG00000000003.9,TSPAN6,coding,chrX:99883666-99894988	ENSG00000005448.12,WDR54,coding,chr2:74648804-74652882	0.325965	10	0.836064
ENSG00000000003.9,TSPAN6,coding,chrX:99883666-99894988	ENSG00000005249.6,PRKAR2B,coding,chr7:106685093-106802256	0.29908	11	0.836064
ENSG00000000003.9,TSPAN6,coding,chrX:99883666-99894988	ENSG00000004660.9,CAMKK1,coding,chr17:3763608-3796338	-0.2864	12	0.836064
ENSG00000000003.9,TSPAN6,coding,chrX:99883666-99894988	ENSG00000147872.5,PLIN2,coding,chr9:19108372-19149288	-0.271898	13	0.836064
ENSG00000000003.9,TSPAN6,coding,chrX:99883666-99894988	ENSG00000001460.12,C1orf201,coding,chr1:24683488-24743424	0.269488	14	0.836064
ENSG00000000003.9,TSPAN6,coding,chrX:99883666-99894988	ENSG00000130055.9,GDPD2,coding,chrX:69642880-69653240	0.267576	15	0.836064
ENSG00000000003.9,TSPAN6,coding,chrX:99883666-99894988	ENSG00000005379.10,BZRAP1,coding,chr17:56378597-56406152	0.234828	16	0.836064
ENSG00000000003.9,TSPAN6,coding,chrX:99883666-99894988	ENSG00000007392.12,LUC7L,coding,chr16:238967-279462	0.217413	17	0.836064
ENSG00000000003.9,TSPAN6,coding,chrX:99883666-99894988	ENSG00000150687.6,PRSS23,coding,chr11:86502100-86663886	0.215673	18	0.836064
ENSG00000000003.9,TSPAN6,coding,chrX:99883666-99894988	ENSG00000000005.5,TNMD,coding,chrX:99839798-99854882	0.214063	19	0.836064
ENSG00000000003.9,TSPAN6,coding,chrX:99883666-99894988	ENSG00000005893.11,LAMP2,coding,chrX:119561681-119603220	0.17775	20	0.836064
ENSG00000000003.9,TSPAN6,coding,chrX:99883666-99894988	ENSG00000003402.12,CFLAR,coding,chr2:201980826-202029033	-0.149955	21	0.836064
ENSG00000000003.9,TSPAN6,coding,chrX:99883666-99894988	ENSG00000005486.10,RHBDD2,coding,chr7:75471919-75518244	0.130624	22	0.836064
ENSG00000000003.9,TSPAN6,coding,chrX:99883666-99894988	ENSG00000234948.1,RP4-723E3.1.1,lncRNA,chr20:50827183-51266970	0.129403	23	0.836064
ENSG00000000003.9,TSPAN6,coding,chrX:99883666-99894988	ENSG00000002746.8,HECW1,coding,chr7:43152197-43602938	0.114384	24	0.836064
ENSG00000000003.9,TSPAN6,coding,chrX:99883666-99894988	ENSG00000001461.11,NIPAL3,coding,chr1:24742283-24799466	-0.100566	25	0.836064
ENSG00000000003.9,TSPAN6,coding,chrX:99883666-99894988	ENSG00000007306.8,CEACAM7,coding,chr19:42177234-42192296	0.0984552	26	0.836064
ENSG00000000003.9,TSPAN6,coding,chrX:99883666-99894988	ENSG00000044012.3,GUCA2B,coding,chr1:42619091-42621495	0.0898186	27	0.836064
ENSG00000000003.9,TSPAN6,coding,chrX:99883666-99894988	ENSG00000010318.13,PHF7,coding,chr3:52443509-52457657	-0.0361035	28	0.836064
ENSG00000000003.9,TSPAN6,coding,chrX:99883666-99894988	ENSG00000005189.14,AC004381.6.1,coding,chr16:20817750-20860990	0.0359409	29	0.836064
ENSG00000000003.9,TSPAN6,coding,chrX:99883666-99894988	ENSG00000004975.6,DVL2,coding,chr17:7128659-7137868	-0.0314331	30	0.836064
ENSG00000000003.9,TSPAN6,coding,chrX:99883666-99894988	ENSG00000001617.7,SEMA3F,coding,chr3:50192477-50226508	0.00661106	31	0.836064
ENSG00000000005.5,TNMD,coding,chrX:99839798-99854882	ENSG00000003147.13,ICA1,coding,chr7:8152813-8302317	-0.303046	1	0.24308
ENSG00000000005.5,TNMD,coding,chrX:99839798-99854882	ENSG00000063978.10,RNF4,coding,chr4:2463946-2627047	-0.278549	2	0.24308
ENSG00000000005.5,TNMD,coding,chrX:99839798-99854882	ENSG00000004776.5,HSPB6,coding,chr19:36245469-36247930	0.253245	3	0.24308
ENSG00000000005.5,TNMD,coding,chrX:99839798-99854882	ENSG00000003137.4,CYP26B1,coding,chr2:72356366-72375167	0.229562	4	0.24308
ENSG00000000005.5,TNMD,coding,chrX:99839798-99854882	ENSG00000000003.9,TSPAN6,coding,chrX:99883666-99894988	0.214063	5	0.24308
ENSG00000000005.5,TNMD,coding,chrX:99839798-99854882	ENSG00000000457.8,SCYL3,coding,chr1:169821803-169863408	-0.174448	6	0.24308
ENSG00000000419.7,DPM1,coding,chr20:49551403-49575092	ENSG00000101166.11,SLMO2,coding,chr20:57608199-57617964	0.838721	1	0.918023
ENSG00000000419.7,DPM1,coding,chr20:49551403-49575092	ENSG00000005175.5,RPAP3,coding,chr12:48057069-48099844	0.821533	2	0.918023
ENSG00000000419.7,DPM1,coding,chr20:49551403-49575092	ENSG00000004897.5,CDC27,coding,chr17:45195068-45266788	0.714933	3	0.918023
ENSG00000000419.7,DPM1,coding,chr20:49551403-49575092	ENSG00000165264.6,NDUFB6,coding,chr9:32552996-32573160	0.64948	4	0.918023
ENSG00000000419.7,DPM1,coding,chr20:49551403-49575092	ENSG00000088930.6,XRN2,coding,chr20:21283941-21370463	0.64813	5	0.918023
ENSG00000000419.7,DPM1,coding,chr20:49551403-49575092	ENSG00000022277.8,C20orf43,coding,chr20:55043646-55093943	0.629078	6	0.918023
ENSG00000000419.7,DPM1,coding,chr20:49551403-49575092	ENSG00000005206.9,AC004410.1,coding,chr19:2328628-2355099	-0.619292	7	0.918023
ENSG00000000419.7,DPM1,coding,chr20:49551403-49575092	ENSG00000004779.4,NDUFAB1,coding,chr16:23592322-23607677	0.614951	8	0.918023
ENSG00000000419.7,DPM1,coding,chr20:49551403-49575092	ENSG00000020426.6,MNAT1,coding,chr14:61201459-61436671	0.613462	9	0.918023
ENSG00000000419.7,DPM1,coding,chr20:49551403-49575092	ENSG00000001631.9,KRIT1,coding,chr7:91828282-91875480	0.592217	10	0.918023
ENSG00000000419.7,DPM1,coding,chr20:49551403-49575092	ENSG00000099910.12,KLHL22,coding,chr22:20783527-20850170	-0.56994	11	0.918023
ENSG00000000419.7,DPM1,coding,chr20:49551403-49575092	ENSG00000001629.5,ANKIB1,coding,chr7:91875547-92030698	0.558063	12	0.918023
ENSG00000000419.7,DPM1,coding,chr20:49551403-49575092	ENSG00000005893.11,LAMP2,coding,chrX:119561681-119603220	0.554217	13	0.918023
ENSG00000000419.7,DPM1,coding,chr20:49551403-49575092	ENSG00000000460.11,C1orf112,coding,chr1:169631244-169823221	0.51016	14	0.918023
ENSG00000000419.7,DPM1,coding,chr20:49551403-49575092	ENSG00000003987.9,MTMR7,coding,chr8:17155538-17271037	0.493057	15	0.918023
ENSG00000000419.7,DPM1,coding,chr20:49551403-49575092	ENSG00000124228.9,DDX27,coding,chr20:47835831-47860614	0.492504	16	0.918023
ENSG00000000419.7,DPM1,coding,chr20:49551403-49575092	ENSG00000002822.9,MAD1L1,coding,chr7:1855382-2272878	-0.411694	17	0.918023
ENSG00000000419.7,DPM1,coding,chr20:49551403-49575092	ENSG00000001561.5,ENPP4,coding,chr6:46097700-46114435	0.398528	18	0.918023
ENSG00000000419.7,DPM1,coding,chr20:49551403-49575092	ENSG00000001036.8,FUCA2,coding,chr6:143816613-143832827	0.398222	19	0.918023
ENSG00000000419.7,DPM1,coding,chr20:49551403-49575092	ENSG00000004487.10,KDM1A,coding,chr1:23345940-23410182	0.34878	20	0.918023
ENSG00000000419.7,DPM1,coding,chr20:49551403-49575092	ENSG00000004455.11,AK2,coding,chr1:33473584-33546597	0.344794	21	0.918023
ENSG00000000419.7,DPM1,coding,chr20:49551403-49575092	ENSG00000000003.9,TSPAN6,coding,chrX:99883666-99894988	0.336907	22	0.918023
ENSG00000000419.7,DPM1,coding,chr20:49551403-49575092	ENSG00000002549.7,LAP3,coding,chr4:17578814-17609595	0.314606	23	0.918023
ENSG00000000419.7,DPM1,coding,chr20:49551403-49575092	ENSG00000008869.6,HEATR5B,coding,chr2:37195525-37311485	0.284633	24	0.918023
ENSG00000000419.7,DPM1,coding,chr20:49551403-49575092	ENSG00000000457.8,SCYL3,coding,chr1:169821803-169863408	0.270494	25	0.918023
ENSG00000000419.7,DPM1,coding,chr20:49551403-49575092	ENSG00000002834.11,LASP1,coding,chr17:37026255-37078023	0.264945	26	0.918023
ENSG00000000419.7,DPM1,coding,chr20:49551403-49575092	ENSG00000020256.14,ZFP64,coding,chr20:50668201-50820847	0.254089	27	0.918023
ENSG00000000419.7,DPM1,coding,chr20:49551403-49575092	ENSG00000007372.14,PAX6,coding,chr11:31806339-31839509	0.21397	28	0.918023
ENSG00000000419.7,DPM1,coding,chr20:49551403-49575092	ENSG00000003756.11,RBM5,coding,chr3:50126340-50156454	-0.203834	29	0.918023
ENSG00000000419.7,DPM1,coding,chr20:49551403-49575092	ENSG00000004534.9,RBM6,coding,chr3:49977439-50137478	0.195718	30	0.918023
ENSG00000000419.7,DPM1,coding,chr20:49551403-49575092	ENSG00000004975.6,DVL2,coding,chr17:7128659-7137868	0.182668	31	0.918023
ENSG00000000419.7,DPM1,coding,chr20:49551403-49575092	ENSG00000002016.11,RAD52,coding,chr12:1021242-1100356	0.164289	32	0.918023
ENSG00000000419.7,DPM1,coding,chr20:49551403-49575092	ENSG00000002746.8,HECW1,coding,chr7:43152197-43602938	-0.1464	33	0.918023
ENSG00000000419.7,DPM1,coding,chr20:49551403-49575092	ENSG00000001460.12,C1orf201,coding,chr1:24683488-24743424	-0.143668	34	0.918023
ENSG00000000419.7,DPM1,coding,chr20:49551403-49575092	ENSG00000001626.8,CFTR,coding,chr7:117105837-117308719	-0.0896884	35	0.918023
ENSG00000000457.8,SCYL3,coding,chr1:169821803-169863408	ENSG00000047410.7,TPR,coding,chr1:186282953-186344825	0.724808	1	0.903638
ENSG00000000457.8,SCYL3,coding,chr1:169821803-169863408	ENSG00000120370.7,GORAB,coding,chr1:170501269-170522974	0.702394	2	0.903638
ENSG00000000457.8,SCYL3,coding,chr1:169821803-169863408	ENSG00000010072.10,C1orf124,coding,chr1:231472849-231490769	0.688087	3	0.903638
ENSG00000000457.8,SCYL3,coding,chr1:169821803-169863408	ENSG00000010165.13,METTL13,coding,chr1:171750787-171783163	0.635055	4	0.903638
ENSG00000000457.8,SCYL3,coding,chr1:169821803-169863408	ENSG00000004766.11,CCDC132,coding,chr7:92861652-92988338	0.63418	5	0.903638
ENSG00000000457.8,SCYL3,coding,chr1:169821803-169863408	ENSG00000001631.9,KRIT1,coding,chr7:91828282-91875480	0.52229	6	0.903638
ENSG00000000457.8,SCYL3,coding,chr1:169821803-169863408	ENSG00000028116.11,VRK2,coding,chr2:58134785-58387055	0.512394	7	0.903638
ENSG00000000457.8,SCYL3,coding,chr1:169821803-169863408	ENSG00000001561.5,ENPP4,coding,chr6:46097700-46114435	0.511736	8	0.903638
ENSG00000000457.8,SCYL3,coding,chr1:169821803-169863408	ENSG00000000460.11,C1orf112,coding,chr1:169631244-169823221	0.496601	9	0.903638
ENSG00000000457.8,SCYL3,coding,chr1:169821803-169863408	ENSG00000005175.5,RPAP3,coding,chr12:48057069-48099844	0.402978	10	0.903638
ENSG00000000457.8,SCYL3,coding,chr1:169821803-169863408	ENSG00000127080.5,IPPK,coding,chr9:95375465-95432547	0.391548	11	0.903638
ENSG00000000457.8,SCYL3,coding,chr1:169821803-169863408	ENSG00000030066.8,NUP160,coding,chr11:47799638-47870107	0.383231	12	0.903638
ENSG00000000457.8,SCYL3,coding,chr1:169821803-169863408	ENSG00000001630.10,CYP51A1,coding,chr7:91741464-91772266	0.3517	13	0.903638
ENSG00000000457.8,SCYL3,coding,chr1:169821803-169863408	ENSG00000081791.4,KIAA0141,coding,chr5:141303372-141321612	0.340696	14	0.903638
ENSG00000000457.8,SCYL3,coding,chr1:169821803-169863408	ENSG00000005238.13,FAM214B,coding,chr9:35104108-35115999	-0.323786	15	0.903638
ENSG00000000457.8,SCYL3,coding,chr1:169821803-169863408	ENSG00000006634.3,DBF4,coding,chr7:87505530-87538856	0.31565	16	0.903638
ENSG00000000457.8,SCYL3,coding,chr1:169821803-169863408	ENSG00000003756.11,RBM5,coding,chr3:50126340-50156454	0.301709	17	0.903638
ENSG00000000457.8,SCYL3,coding,chr1:169821803-169863408	ENSG00000058804.9,TMEM48,coding,chr1:54231132-54304533	0.283737	18	0.903638
ENSG00000000457.8,SCYL3,coding,chr1:169821803-169863408	ENSG00000003147.13,ICA1,coding,chr7:8152813-8302317	0.278458	19	0.903638
ENSG00000000457.8,SCYL3,coding,chr1:169821803-169863408	ENSG00000000419.7,DPM1,coding,chr20:49551403-49575092	0.270494	20	0.903638
ENSG00000000457.8,SCYL3,coding,chr1:169821803-169863408	ENSG00000001084.6,GCLC,coding,chr6:53362138-53481768	0.268916	21	0.903638
ENSG00000000457.8,SCYL3,coding,chr1:169821803-169863408	ENSG00000005102.8,MEOX1,coding,chr17:41717755-41739322	-0.266503	22	0.903638
ENSG00000000457.8,SCYL3,coding,chr1:169821803-169863408	ENSG00000001461.11,NIPAL3,coding,chr1:24742283-24799466	0.260803	23	0.903638
ENSG00000000457.8,SCYL3,coding,chr1:169821803-169863408	ENSG00000001497.12,LAS1L,coding,chrX:64732461-64754655	-0.236554	24	0.903638
ENSG00000000457.8,SCYL3,coding,chr1:169821803-169863408	ENSG00000107736.13,CDH23,coding,chr10:73156690-73575702	-0.194286	25	0.903638
ENSG00000000457.8,SCYL3,coding,chr1:169821803-169863408	ENSG00000001460.12,C1orf201,coding,chr1:24683488-24743424	0.194113	26	0.903638
ENSG00000000457.8,SCYL3,coding,chr1:169821803-169863408	ENSG00000000005.5,TNMD,coding,chrX:99839798-99854882	-0.174448	27	0.903638
ENSG00000000457.8,SCYL3,coding,chr1:169821803-169863408	ENSG00000002834.11,LASP1,coding,chr17:37026255-37078023	-0.104439	28	0.903638
ENSG00000000457.8,SCYL3,coding,chr1:169821803-169863408	ENSG00000127884.4,ECHS1,coding,chr10:135175983-135187193	-0.102695	29	0.903638
ENSG00000000457.8,SCYL3,coding,chr1:169821803-169863408	ENSG00000000971.10,CFH,coding,chr1:196621007-196716634	0.0900016	30	0.903638
ENSG00000000457.8,SCYL3,coding,chr1:169821803-169863408	ENSG00000006210.6,CX3CL1,coding,chr16:57406369-57418960	0.0810941	31	0.903638
ENSG00000000457.8,SCYL3,coding,chr1:169821803-169863408	ENSG00000002330.8,BAD,coding,chr11:64037301-64052176	-0.066976	32	0.903638
ENSG00000000457.8,SCYL3,coding,chr1:169821803-169863408	ENSG00000010818.4,HIVEP2,coding,chr6:143072603-143266338	0.0566711	33	0.903638
ENSG00000000457.8,SCYL3,coding,chr1:169821803-169863408	ENSG00000003509.11,C2orf56,coding,chr2:37458773-37480546	0.0539592	34	0.903638
ENSG00000000457.8,SCYL3,coding,chr1:169821803-169863408	ENSG00000006555.6,TTC22,coding,chr1:55245384-55266940	0.0490272	35	0.903638
ENSG00000000457.8,SCYL3,coding,chr1:169821803-169863408	ENSG00000025772.7,TOMM34,coding,chr20:43570770-43589127	-0.00619229	36	0.903638
ENSG00000000457.8,SCYL3,coding,chr1:169821803-169863408	ENSG00000005059.11,CCDC109B,coding,chr4:110481360-110609874	0.00320873	37	0.903638
ENSG00000000460.11,C1orf112,coding,chr1:169631244-169823221	ENSG00000010292.7,NCAPD2,coding,chr12:6602521-6641121	0.7325	1	0.876593
ENSG00000000460.11,C1orf112,coding,chr1:169631244-169823221	ENSG00000024526.11,DEPDC1,coding,chr1:68939834-68962904	0.718593	2	0.876593
ENSG00000000460.11,C1orf112,coding,chr1:169631244-169823221	ENSG00000101557.8,USP14,coding,chr18:158482-213739	0.649575	3	0.876593
ENSG00000000460.11,C1orf112,coding,chr1:169631244-169823221	ENSG00000012048.13,BRCA1,coding,chr17:41196311-41322290	0.644266	4	0.876593
ENSG00000000460.11,C1orf112,coding,chr1:169631244-169823221	ENSG00000006634.3,DBF4,coding,chr7:87505530-87538856	0.618393	5	0.876593
ENSG00000000460.11,C1orf112,coding,chr1:169631244-169823221	ENSG00000004700.11,RECQL,coding,chr12:21621844-21654603	0.581049	6	0.876593
ENSG00000000460.11,C1orf112,coding,chr1:169631244-169823221	ENSG00000001167.10,NFYA,coding,chr6:41040683-41067715	0.578807	7	0.876593
ENSG00000000460.11,C1orf112,coding,chr1:169631244-169823221	ENSG00000000419.7,DPM1,coding,chr20:49551403-49575092	0.51016	8	0.876593
ENSG00000000460.11,C1orf112,coding,chr1:169631244-169823221	ENSG00000000457.8,SCYL3,coding,chr1:169821803-169863408	0.496601	9	0.876593
ENSG00000000460.11,C1orf112,coding,chr1:169631244-169823221	ENSG00000001629.5,ANKIB1,coding,chr7:91875547-92030698	0.474969	10	0.876593
ENSG00000000460.11,C1orf112,coding,chr1:169631244-169823221	ENSG00000006451.3,RALA,coding,chr7:39663081-39747723	0.467534	11	0.876593
ENSG00000000460.11,C1orf112,coding,chr1:169631244-169823221	ENSG00000006282.12,SPATA20,coding,chr17:48620418-48633213	-0.321215	12	0.876593
ENSG00000000460.11,C1orf112,coding,chr1:169631244-169823221	ENSG00000000938.7,FGR,coding,chr1:27938574-27961788	-0.283359	13	0.876593
ENSG00000000460.11,C1orf112,coding,chr1:169631244-169823221	ENSG00000004777.10,ARHGAP33,coding,chr19:36266416-36279724	0.279445	14	0.876593
ENSG00000000460.11,C1orf112,coding,chr1:169631244-169823221	ENSG00000074370.12,ATP2A3,coding,chr17:3822868-3867736	-0.272121	15	0.876593
ENSG00000000460.11,C1orf112,coding,chr1:169631244-169823221	ENSG00000054611.9,TBC1D22A,coding,chr22:47158517-47571336	-0.264071	16	0.876593
ENSG00000000460.11,C1orf112,coding,chr1:169631244-169823221	ENSG00000070047.6,PHRF1,coding,chr11:576485-612222	0.228906	17	0.876593
ENSG00000000460.11,C1orf112,coding,chr1:169631244-169823221	ENSG00000100380.7,ST13,coding,chr22:41220538-41253026	0.225461	18	0.876593
ENSG00000000460.11,C1orf112,coding,chr1:169631244-169823221	ENSG00000013297.5,CLDN11,coding,chr3:170136652-170578169	0.214566	19	0.876593
ENSG00000000460.11,C1orf112,coding,chr1:169631244-169823221	ENSG00000001561.5,ENPP4,coding,chr6:46097700-46114435	0.185191	20	0.876593
ENSG00000000460.11,C1orf112,coding,chr1:169631244-169823221	ENSG00000008952.10,SEC62,coding,chr3:169684422-169716161	0.183508	21	0.876593
ENSG00000000460.11,C1orf112,coding,chr1:169631244-169823221	ENSG00000001460.12,C1orf201,coding,chr1:24683488-24743424	-0.181512	22	0.876593
ENSG00000000460.11,C1orf112,coding,chr1:169631244-169823221	ENSG00000158773.10,USF1,coding,chr1:161009040-161015767	0.160943	23	0.876593
ENSG00000000460.11,C1orf112,coding,chr1:169631244-169823221	ENSG00000001497.12,LAS1L,coding,chrX:64732461-64754655	0.130348	24	0.876593
ENSG00000000460.11,C1orf112,coding,chr1:169631244-169823221	ENSG00000003249.8,DBNDD1,coding,chr16:90071272-90086536	0.094373	25	0.876593
ENSG00000000460.11,C1orf112,coding,chr1:169631244-169823221	ENSG00000002745.7,WNT16,coding,chr7:120965420-120981158	-0.0686439	26	0.876593
ENSG00000000460.11,C1orf112,coding,chr1:169631244-169823221	ENSG00000006459.6,JHDM1D,coding,chr7:139784545-139876835	0.0440588	27	0.876593
ENSG00000000460.11,C1orf112,coding,chr1:169631244-169823221	ENSG00000019102.7,VSIG2,coding,chr11:124617367-124622134	-0.0380342	28	0.876593
ENSG00000000938.7,FGR,coding,chr1:27938574-27961788	ENSG00000140678.11,ITGAX,coding,chr16:31366454-31394318	0.889712	1	0.890601
ENSG00000000938.7,FGR,coding,chr1:27938574-27961788	ENSG00000010610.5,CD4,coding,chr12:6896023-6929974	0.777888	2	0.890601
ENSG00000000938.7,FGR,coding,chr1:27938574-27961788	ENSG00000010671.10,BTK,coding,chrX:100604434-100641183	0.766591	3	0.890601
ENSG00000000938.7,FGR,coding,chr1:27938574-27961788	ENSG00000005844.11,ITGAL,coding,chr16:30483978-30534289	0.759426	4	0.890601
ENSG00000000938.7,FGR,coding,chr1:27938574-27961788	ENSG00000115956.9,PLEK,coding,chr2:68592304-68624585	0.753697	5	0.890601
ENSG00000000938.7,FGR,coding,chr1:27938574-27961788	ENSG00000072694.13,FCGR2B,coding,chr1:161551100-161648444	0.72858	6	0.890601
ENSG00000000938.7,FGR,coding,chr1:27938574-27961788	ENSG00000010295.13,IFFO1,coding,chr12:6647540-6665239	0.723405	7	0.890601
ENSG00000000938.7,FGR,coding,chr1:27938574-27961788	ENSG00000085265.5,FCN1,coding,chr9:137797735-137809809	0.663214	8	0.890601
ENSG00000000938.7,FGR,coding,chr1:27938574-27961788	ENSG00000006075.10,CCL3,coding,chr17:34415601-34417515	0.596749	9	0.890601
ENSG00000000938.7,FGR,coding,chr1:27938574-27961788	ENSG00000008516.10,MMP25,coding,chr16:3096681-3110703	0.590515	10	0.890601
ENSG00000000938.7,FGR,coding,chr1:27938574-27961788	ENSG00000004468.6,CD38,coding,chr4:15779897-15851069	0.588579	11	0.890601
ENSG00000000938.7,FGR,coding,chr1:27938574-27961788	ENSG00000018280.12,SLC11A1,coding,chr2:219246751-219261617	0.456301	12	0.890601
ENSG00000000938.7,FGR,coding,chr1:27938574-27961788	ENSG00000003400.10,CASP10,coding,chr2:202047603-202094129	0.37921	13	0.890601
ENSG00000000938.7,FGR,coding,chr1:27938574-27961788	ENSG00000003402.12,CFLAR,coding,chr2:201980826-202029033	0.378353	14	0.890601
ENSG00000000938.7,FGR,coding,chr1:27938574-27961788	ENSG00000000971.10,CFH,coding,chr1:196621007-196716634	0.29152	15	0.890601
ENSG00000000938.7,FGR,coding,chr1:27938574-27961788	ENSG00000002933.3,TMEM176A,coding,chr7:150497490-150502208	0.290051	16	0.890601
ENSG00000000938.7,FGR,coding,chr1:27938574-27961788	ENSG00000034971.8,MYOC,coding,chr1:171604556-171621857	0.28794	17	0.890601
ENSG00000000938.7,FGR,coding,chr1:27938574-27961788	ENSG00000000460.11,C1orf112,coding,chr1:169631244-169823221	-0.283359	18	0.890601
ENSG00000000938.7,FGR,coding,chr1:27938574-27961788	ENSG00000005471.11,ABCB4,coding,chr7:87031012-87109751	0.245481	19	0.890601
ENSG00000000938.7,FGR,coding,chr1:27938574-27961788	ENSG00000002549.7,LAP3,coding,chr4:17578814-17609595	0.238719	20	0.890601
ENSG00000000938.7,FGR,coding,chr1:27938574-27961788	ENSG00000006377.9,DLX6,coding,chr7:96634859-96640351	-0.222837	21	0.890601
ENSG00000000938.7,FGR,coding,chr1:27938574-27961788	ENSG00000000003.9,TSPAN6,coding,chrX:99883666-99894988	-0.188013	22	0.890601
ENSG00000000938.7,FGR,coding,chr1:27938574-27961788	ENSG00000115415.13,STAT1,coding,chr2:191829083-191885686	0.164855	23	0.890601
ENSG00000000938.7,FGR,coding,chr1:27938574-27961788	ENSG00000105472.6,CLEC11A,coding,chr19:51226604-51228979	0.150786	24	0.890601
ENSG00000000938.7,FGR,coding,chr1:27938574-27961788	ENSG00000001036.8,FUCA2,coding,chr6:143816613-143832827	0.141678	25	0.890601
ENSG00000000938.7,FGR,coding,chr1:27938574-27961788	ENSG00000004961.10,HCCS,coding,chrX:11129420-11141198	-0.0853804	26	0.890601
ENSG00000000938.7,FGR,coding,chr1:27938574-27961788	ENSG00000167280.9,ENGASE,coding,chr17:77071018-77084681	0.062084	27	0.890601
ENSG00000000938.7,FGR,coding,chr1:27938574-27961788	ENSG00000090402.3,SI,coding,chr3:164696685-164796283	0.0569896	28	0.890601
ENSG00000000971.10,CFH,coding,chr1:196621007-196716634	ENSG00000106714.12,CNTNAP3,coding,chr9:39072763-39288456	0.391195	1	0.548703
ENSG00000000971.10,CFH,coding,chr1:196621007-196716634	ENSG00000006047.7,YBX2,coding,chr17:7191570-7197876	-0.383471	2	0.548703
ENSG00000000971.10,CFH,coding,chr1:196621007-196716634	ENSG00000079156.11,OSBPL6,coding,chr2:179059207-179264160	0.373649	3	0.548703
ENSG00000000971.10,CFH,coding,chr1:196621007-196716634	ENSG00000007933.8,FMO3,coding,chr1:171060017-171086959	0.366029	4	0.548703
ENSG00000000971.10,CFH,coding,chr1:196621007-196716634	ENSG00000002587.5,HS3ST1,coding,chr4:11394773-11431389	0.339932	5	0.548703
ENSG00000000971.10,CFH,coding,chr1:196621007-196716634	ENSG00000000938.7,FGR,coding,chr1:27938574-27961788	0.29152	6	0.548703
ENSG00000000971.10,CFH,coding,chr1:196621007-196716634	ENSG00000001626.8,CFTR,coding,chr7:117105837-117308719	0.27646	7	0.548703
ENSG00000000971.10,CFH,coding,chr1:196621007-196716634	ENSG00000116785.8,CFHR3,coding,chr1:196743924-196764536	0.273505	8	0.548703
ENSG00000000971.10,CFH,coding,chr1:196621007-196716634	ENSG00000004777.10,ARHGAP33,coding,chr19:36266416-36279724	-0.260716	9	0.548703
ENSG00000000971.10,CFH,coding,chr1:196621007-196716634	ENSG00000154548.8,SRSF12,coding,chr6:89805677-89827800	-0.247227	10	0.548703
ENSG00000000971.10,CFH,coding,chr1:196621007-196716634	ENSG00000011028.8,MRC2,coding,chr17:60704761-60770956	0.239293	11	0.548703
ENSG00000000971.10,CFH,coding,chr1:196621007-196716634	ENSG00000005249.6,PRKAR2B,coding,chr7:106685093-106802256	0.209243	12	0.548703
ENSG00000000971.10,CFH,coding,chr1:196621007-196716634	ENSG00000002745.7,WNT16,coding,chr7:120965420-120981158	0.194605	13	0.548703
ENSG00000000971.10,CFH,coding,chr1:196621007-196716634	ENSG00000001084.6,GCLC,coding,chr6:53362138-53481768	0.179508	14	0.548703
ENSG00000001036.8,FUCA2,coding,chr6:143816613-143832827	ENSG00000010270.9,STARD3NL,coding,chr7:38217823-38270272	0.45105	1	0.812157
ENSG00000001036.8,FUCA2,coding,chr6:143816613-143832827	ENSG00000009844.9,VTA1,coding,chr6:142468366-142542085	0.445833	2	0.812157
ENSG00000001036.8,FUCA2,coding,chr6:143816613-143832827	ENSG00000004866.13,ST7,coding,chr7:116593291-116870157	0.433756	3	0.812157
ENSG00000001036.8,FUCA2,coding,chr6:143816613-143832827	ENSG00000000419.7,DPM1,coding,chr20:49551403-49575092	0.398222	4	0.812157
ENSG00000001036.8,FUCA2,coding,chr6:143816613-143832827	ENSG00000049449.3,RCN1,coding,chr11:31833938-32127301	0.391837	5	0.812157
ENSG00000001036.8,FUCA2,coding,chr6:143816613-143832827	ENSG00000008324.6,SS18L2,coding,chr3:42623331-42636606	0.391612	6	0.812157
ENSG00000001036.8,FUCA2,coding,chr6:143816613-143832827	ENSG00000001617.7,SEMA3F,coding,chr3:50192477-50226508	-0.352779	7	0.812157
ENSG00000001036.8,FUCA2,coding,chr6:143816613-143832827	ENSG00000001561.5,ENPP4,coding,chr6:46097700-46114435	0.352243	8	0.812157
ENSG00000001036.8,FUCA2,coding,chr6:143816613-143832827	ENSG00000108384.9,RAD51C,coding,chr17:56769933-56811703	0.349266	9	0.812157
ENSG00000001036.8,FUCA2,coding,chr6:143816613-143832827	ENSG00000010704.13,HFE,coding,chr6:26087508-26098571	0.337695	10	0.812157
ENSG00000001036.8,FUCA2,coding,chr6:143816613-143832827	ENSG00000003147.13,ICA1,coding,chr7:8152813-8302317	0.269165	11	0.812157
ENSG00000001036.8,FUCA2,coding,chr6:143816613-143832827	ENSG00000101474.7,C20orf3,coding,chr20:24943560-24973615	0.267849	12	0.812157
ENSG00000001036.8,FUCA2,coding,chr6:143816613-143832827	ENSG00000011258.9,MBTD1,coding,chr17:49254785-49337524	0.258052	13	0.812157
ENSG00000001036.8,FUCA2,coding,chr6:143816613-143832827	ENSG00000032389.8,TSSC1,coding,chr2:3192695-3381653	-0.25095	14	0.812157
ENSG00000001036.8,FUCA2,coding,chr6:143816613-143832827	ENSG00000038274.10,MAT2B,coding,chr5:162930119-162946342	0.240097	15	0.812157
ENSG00000001036.8,FUCA2,coding,chr6:143816613-143832827	ENSG00000008382.10,MPND,coding,chr19:4343523-4360082	-0.208025	16	0.812157
ENSG00000001036.8,FUCA2,coding,chr6:143816613-143832827	ENSG00000001630.10,CYP51A1,coding,chr7:91741464-91772266	-0.200937	17	0.812157
ENSG00000001036.8,FUCA2,coding,chr6:143816613-143832827	ENSG00000004660.9,CAMKK1,coding,chr17:3763608-3796338	-0.200602	18	0.812157
ENSG00000001036.8,FUCA2,coding,chr6:143816613-143832827	ENSG00000009765.10,IYD,coding,chr6:150690027-150727105	0.192733	19	0.812157
ENSG00000001036.8,FUCA2,coding,chr6:143816613-143832827	ENSG00000248103.1,CTC-338M12.9.1,lncRNA,chr5:180708375-180710653	-0.186053	20	0.812157
ENSG00000001036.8,FUCA2,coding,chr6:143816613-143832827	ENSG00000100968.9,NFATC4,coding,chr14:24834878-24848810	-0.184583	21	0.812157
ENSG00000001036.8,FUCA2,coding,chr6:143816613-143832827	ENSG00000003137.4,CYP26B1,coding,chr2:72356366-72375167	-0.177848	22	0.812157
ENSG00000001036.8,FUCA2,coding,chr6:143816613-143832827	ENSG00000000003.9,TSPAN6,coding,chrX:99883666-99894988	0.171148	23	0.812157
ENSG00000001036.8,FUCA2,coding,chr6:143816613-143832827	ENSG00000039523.11,FAM65A,coding,chr16:67552320-67580689	0.158381	24	0.812157
ENSG00000001036.8,FUCA2,coding,chr6:143816613-143832827	ENSG00000010017.8,RANBP9,coding,chr6:13621729-13711953	0.157506	25	0.812157
ENSG00000001036.8,FUCA2,coding,chr6:143816613-143832827	ENSG00000000938.7,FGR,coding,chr1:27938574-27961788	0.141678	26	0.812157
ENSG00000001036.8,FUCA2,coding,chr6:143816613-143832827	ENSG00000030582.10,GRN,coding,chr17:42422490-42430470	-0.124652	27	0.812157
ENSG00000001036.8,FUCA2,coding,chr6:143816613-143832827	ENSG00000005810.12,MYCBP2,coding,chr13:77618791-77901185	-0.115195	28	0.812157
ENSG00000001036.8,FUCA2,coding,chr6:143816613-143832827	ENSG00000133110.9,POSTN,coding,chr13:38136719-38183563	-0.0747253	29	0.812157
ENSG00000001036.8,FUCA2,coding,chr6:143816613-143832827	ENSG00000006128.7,TAC1,coding,chr7:97361219-97369784	-0.0642119	30	0.812157
ENSG00000001084.6,GCLC,coding,chr6:53362138-53481768	ENSG00000249379.1,RP1-27K12.4.1,lncRNA,chr6:53367982-53371717	0.494235	1	0.701593
ENSG00000001084.6,GCLC,coding,chr6:53362138-53481768	ENSG00000107581.6,EIF3A,coding,chr10:120794355-120840396	0.415457	2	0.701593
ENSG00000001084.6,GCLC,coding,chr6:53362138-53481768	ENSG00000049192.9,ADAMTS6,coding,chr5:64444562-64777747	0.388018	3	0.701593
ENSG00000001084.6,GCLC,coding,chr6:53362138-53481768	ENSG00000001629.5,ANKIB1,coding,chr7:91875547-92030698	0.374973	4	0.701593
ENSG00000001084.6,GCLC,coding,chr6:53362138-53481768	ENSG00000023909.5,GCLM,coding,chr1:94350760-94374966	0.371895	5	0.701593
ENSG00000001084.6,GCLC,coding,chr6:53362138-53481768	ENSG00000187134.8,AKR1C1,coding,chr10:4934795-5025475	0.356449	6	0.701593
ENSG00000001084.6,GCLC,coding,chr6:53362138-53481768	ENSG00000137269.9,LRRC1,coding,chr6:53659294-53788919	0.35171	7	0.701593
ENSG00000001084.6,GCLC,coding,chr6:53362138-53481768	ENSG00000005100.7,DHX33,coding,chr17:5344231-5372236	0.344705	8	0.701593
ENSG00000001084.6,GCLC,coding,chr6:53362138-53481768	ENSG00000005884.11,ITGA3,coding,chr17:48133331-48167848	-0.337294	9	0.701593
ENSG00000001084.6,GCLC,coding,chr6:53362138-53481768	ENSG00000004660.9,CAMKK1,coding,chr17:3763608-3796338	-0.284744	10	0.701593
ENSG00000001084.6,GCLC,coding,chr6:53362138-53481768	ENSG00000065675.9,PRKCQ,coding,chr10:6469104-6622263	0.274	11	0.701593
ENSG00000001084.6,GCLC,coding,chr6:53362138-53481768	ENSG00000000457.8,SCYL3,coding,chr1:169821803-169863408	0.268916	12	0.701593
ENSG00000001084.6,GCLC,coding,chr6:53362138-53481768	ENSG00000001617.7,SEMA3F,coding,chr3:50192477-50226508	-0.261914	13	0.701593
ENSG00000001084.6,GCLC,coding,chr6:53362138-53481768	ENSG00000007129.10,CEACAM21,coding,chr19:42041701-42093197	0.253378	14	0.701593
ENSG00000001084.6,GCLC,coding,chr6:53362138-53481768	ENSG00000002587.5,HS3ST1,coding,chr4:11394773-11431389	0.222528	15	0.701593
ENSG00000001084.6,GCLC,coding,chr6:53362138-53481768	ENSG00000087086.7,FTL,coding,chr19:49468565-49470135	0.208617	16	0.701593
ENSG00000001084.6,GCLC,coding,chr6:53362138-53481768	ENSG00000000419.7,DPM1,coding,chr20:49551403-49575092	0.187663	17	0.701593
ENSG00000001084.6,GCLC,coding,chr6:53362138-53481768	ENSG00000000971.10,CFH,coding,chr1:196621007-196716634	0.179508	18	0.701593
ENSG00000001084.6,GCLC,coding,chr6:53362138-53481768	ENSG00000005206.9,AC004410.1,coding,chr19:2328628-2355099	-0.144059	19	0.701593
ENSG00000001084.6,GCLC,coding,chr6:53362138-53481768	ENSG00000104886.3,PLEKHJ1,coding,chr19:2233154-2236319	0.143282	20	0.701593
ENSG00000001084.6,GCLC,coding,chr6:53362138-53481768	ENSG00000005020.7,SKAP2,coding,chr7:26706680-27034858	-0.100765	21	0.701593
ENSG00000001084.6,GCLC,coding,chr6:53362138-53481768	ENSG00000055332.10,EIF2AK2,coding,chr2:37326352-37384208	0.0931737	22	0.701593
ENSG00000001167.10,NFYA,coding,chr6:41040683-41067715	ENSG00000000460.11,C1orf112,coding,chr1:169631244-169823221	0.578807	1	0.746264
ENSG00000001167.10,NFYA,coding,chr6:41040683-41067715	ENSG00000008083.8,JARID2,coding,chr6:15245733-15522252	0.531894	2	0.746264
ENSG00000001167.10,NFYA,coding,chr6:41040683-41067715	ENSG00000005100.7,DHX33,coding,chr17:5344231-5372236	0.524489	3	0.746264
ENSG00000001167.10,NFYA,coding,chr6:41040683-41067715	ENSG00000001629.5,ANKIB1,coding,chr7:91875547-92030698	0.466976	4	0.746264
ENSG00000001167.10,NFYA,coding,chr6:41040683-41067715	ENSG00000006576.11,PHTF2,coding,chr7:77428108-77586818	0.444607	5	0.746264
ENSG00000001167.10,NFYA,coding,chr6:41040683-41067715	ENSG00000004487.10,KDM1A,coding,chr1:23345940-23410182	0.439995	6	0.746264
ENSG00000001167.10,NFYA,coding,chr6:41040683-41067715	ENSG00000112578.5,BYSL,coding,chr6:41888925-41900784	0.436612	7	0.746264
ENSG00000001167.10,NFYA,coding,chr6:41040683-41067715	ENSG00000011304.10,PTBP1,coding,chr19:797391-812327	0.423517	8	0.746264
ENSG00000001167.10,NFYA,coding,chr6:41040683-41067715	ENSG00000005339.6,CREBBP,coding,chr16:3775054-3930722	0.395355	9	0.746264
ENSG00000001167.10,NFYA,coding,chr6:41040683-41067715	ENSG00000005156.5,LIG3,coding,chr17:33307541-33332083	0.394682	10	0.746264
ENSG00000001167.10,NFYA,coding,chr6:41040683-41067715	ENSG00000076554.9,TPD52,coding,chr8:80870570-81143467	0.38752	11	0.746264
ENSG00000001167.10,NFYA,coding,chr6:41040683-41067715	ENSG00000000457.8,SCYL3,coding,chr1:169821803-169863408	0.366516	12	0.746264
ENSG00000001167.10,NFYA,coding,chr6:41040683-41067715	ENSG00000000419.7,DPM1,coding,chr20:49551403-49575092	0.35749	13	0.746264
ENSG00000001167.10,NFYA,coding,chr6:41040683-41067715	ENSG00000090054.8,SPTLC1,coding,chr9:94793426-94877690	0.287584	14	0.746264
ENSG00000001167.10,NFYA,coding,chr6:41040683-41067715	ENSG00000000003.9,TSPAN6,coding,chrX:99883666-99894988	0.244113	15	0.746264
ENSG00000001167.10,NFYA,coding,chr6:41040683-41067715	ENSG00000016402.8,IL20RA,coding,chr6:137321107-137366298	-0.236298	16	0.746264
ENSG00000001167.10,NFYA,coding,chr6:41040683-41067715	ENSG00000002745.7,WNT16,coding,chr7:120965420-120981158	0.144788	17	0.746264
ENSG00000001167.10,NFYA,coding,chr6:41040683-41067715	ENSG00000103707.5,MTFMT,coding,chr15:65294844-65321977	0.144778	18	0.746264
ENSG00000001167.10,NFYA,coding,chr6:41040683-41067715	ENSG00000127585.7,FBXL16,coding,chr16:742499-755829	-0.1307	19	0.746264
ENSG00000001167.10,NFYA,coding,chr6:41040683-41067715	ENSG00000001497.12,LAS1L,coding,chrX:64732461-64754655	-0.0729025	20	0.746264
ENSG00000001167.10,NFYA,coding,chr6:41040683-41067715	ENSG00000001036.8,FUCA2,coding,chr6:143816613-143832827	0.0113918	21	0.746264
ENSG00000001460.12,C1orf201,coding,chr1:24683488-24743424	ENSG00000010626.10,LRRC23,coding,chr12:6982732-7023407	0.775808	1	0.898114
ENSG00000001460.12,C1orf201,coding,chr1:24683488-24743424	ENSG00000096093.9,EFHC1,coding,chr6:52285105-52387892	0.743939	2	0.898114
ENSG00000001460.12,C1orf201,coding,chr1:24683488-24743424	ENSG00000004838.9,ZMYND10,coding,chr3:50378540-50384283	0.742335	3	0.898114
ENSG00000001460.12,C1orf201,coding,chr1:24683488-24743424	ENSG00000005448.12,WDR54,coding,chr2:74648804-74652882	0.573054	4	0.898114
ENSG00000001460.12,C1orf201,coding,chr1:24683488-24743424	ENSG00000117602.6,RCAN3,coding,chr1:24829386-24863506	0.538798	5	0.898114
ENSG00000001460.12,C1orf201,coding,chr1:24683488-24743424	ENSG00000005206.9,AC004410.1,coding,chr19:2328628-2355099	0.469577	6	0.898114
ENSG00000001460.12,C1orf201,coding,chr1:24683488-24743424	ENSG00000006125.11,AP2B1,coding,chr17:33914281-34053434	0.362855	7	0.898114
ENSG00000001460.12,C1orf201,coding,chr1:24683488-24743424	ENSG00000006756.11,ARSD,coding,chrX:2822010-2847392	0.340264	8	0.898114
ENSG00000001460.12,C1orf201,coding,chr1:24683488-24743424	ENSG00000051009.5,FAM160A2,coding,chr11:6232564-6255941	0.323111	9	0.898114
ENSG00000001460.12,C1orf201,coding,chr1:24683488-24743424	ENSG00000003096.9,KLHL13,coding,chrX:117031775-117251303	0.306548	10	0.898114
ENSG00000001460.12,C1orf201,coding,chr1:24683488-24743424	ENSG00000002330.8,BAD,coding,chr11:64037301-64052176	0.298665	11	0.898114
ENSG00000001460.12,C1orf201,coding,chr1:24683488-24743424	ENSG00000001561.5,ENPP4,coding,chr6:46097700-46114435	0.290349	12	0.898114
ENSG00000001460.12,C1orf201,coding,chr1:24683488-24743424	ENSG00000003249.8,DBNDD1,coding,chr16:90071272-90086536	0.275414	13	0.898114
ENSG00000001460.12,C1orf201,coding,chr1:24683488-24743424	ENSG00000000003.9,TSPAN6,coding,chrX:99883666-99894988	0.269488	14	0.898114
ENSG00000001460.12,C1orf201,coding,chr1:24683488-24743424	ENSG00000002933.3,TMEM176A,coding,chr7:150497490-150502208	-0.248337	15	0.898114
ENSG00000001460.12,C1orf201,coding,chr1:24683488-24743424	ENSG00000006704.6,GTF2IRD1,coding,chr7:73868119-74016931	-0.2481	16	0.898114
ENSG00000001460.12,C1orf201,coding,chr1:24683488-24743424	ENSG00000001461.11,NIPAL3,coding,chr1:24742283-24799466	0.237455	17	0.898114
ENSG00000001460.12,C1orf201,coding,chr1:24683488-24743424	ENSG00000004487.10,KDM1A,coding,chr1:23345940-23410182	0.215551	18	0.898114
ENSG00000001460.12,C1orf201,coding,chr1:24683488-24743424	ENSG00000088280.11,ASAP3,coding,chr1:23750351-23810750	-0.197526	19	0.898114
ENSG00000001460.12,C1orf201,coding,chr1:24683488-24743424	ENSG00000000457.8,SCYL3,coding,chr1:169821803-169863408	0.194113	20	0.898114
ENSG00000001460.12,C1orf201,coding,chr1:24683488-24743424	ENSG00000002919.9,SNX11,coding,chr17:46184910-46200105	0.186381	21	0.898114
ENSG00000001460.12,C1orf201,coding,chr1:24683488-24743424	ENSG00000000460.11,C1orf112,coding,chr1:169631244-169823221	-0.181512	22	0.898114
ENSG00000001460.12,C1orf201,coding,chr1:24683488-24743424	ENSG00000004478.5,FKBP4,coding,chr12:2904118-2914576	-0.172827	23	0.898114
ENSG00000001460.12,C1orf201,coding,chr1:24683488-24743424	ENSG00000004700.11,RECQL,coding,chr12:21621844-21654603	-0.167696	24	0.898114
ENSG00000001460.12,C1orf201,coding,chr1:24683488-24743424	ENSG00000040487.8,PQLC2,coding,chr1:19638819-19655794	0.155388	25	0.898114
ENSG00000001460.12,C1orf201,coding,chr1:24683488-24743424	ENSG00000135454.8,B4GALNT1,coding,chr12:58017192-58027138	-0.145625	26	0.898114
ENSG00000001460.12,C1orf201,coding,chr1:24683488-24743424	ENSG00000000419.7,DPM1,coding,chr20:49551403-49575092	-0.143668	27	0.898114
ENSG00000001460.12,C1orf201,coding,chr1:24683488-24743424	ENSG00000086548.7,CEACAM6,coding,chr19:42259328-42276113	0.109561	28	0.898114
ENSG00000001460.12,C1orf201,coding,chr1:24683488-24743424	ENSG00000000005.5,TNMD,coding,chrX:99839798-99854882	-0.107303	29	0.898114
ENSG00000001460.12,C1orf201,coding,chr1:24683488-24743424	ENSG00000004468.6,CD38,coding,chr4:15779897-15851069	0.0959788	30	0.898114
ENSG00000001460.12,C1orf201,coding,chr1:24683488-24743424	ENSG00000005893.11,LAMP2,coding,chrX:119561681-119603220	-0.0957691	31	0.898114
ENSG00000001460.12,C1orf201,coding,chr1:24683488-24743424	ENSG00000004897.5,CDC27,coding,chr17:45195068-45266788	0.0850179	32	0.898114
ENSG00000001460.12,C1orf201,coding,chr1:24683488-24743424	ENSG00000001497.12,LAS1L,coding,chrX:64732461-64754655	0.0787148	33	0.898114
ENSG00000001461.11,NIPAL3,coding,chr1:24742283-24799466	ENSG00000048707.8,VPS13D,coding,chr1:12290123-12572099	0.45021	1	0.606578
ENSG00000001461.11,NIPAL3,coding,chr1:24742283-24799466	ENSG00000023902.8,PLEKHO1,coding,chr1:150121372-150132260	-0.403114	2	0.606578
ENSG00000001461.11,NIPAL3,coding,chr1:24742283-24799466	ENSG00000005810.12,MYCBP2,coding,chr13:77618791-77901185	0.38235	3	0.606578
ENSG00000001461.11,NIPAL3,coding,chr1:24742283-24799466	ENSG00000004059.5,ARF5,coding,chr7:127228398-127231759	-0.332737	4	0.606578
ENSG00000001461.11,NIPAL3,coding,chr1:24742283-24799466	ENSG00000011007.7,TCEB3,coding,chr1:24069644-24088549	0.300461	5	0.606578
ENSG00000001461.11,NIPAL3,coding,chr1:24742283-24799466	ENSG00000003056.3,M6PR,coding,chr12:9092958-9102551	0.285881	6	0.606578
ENSG00000001461.11,NIPAL3,coding,chr1:24742283-24799466	ENSG00000000457.8,SCYL3,coding,chr1:169821803-169863408	0.260803	7	0.606578
ENSG00000001461.11,NIPAL3,coding,chr1:24742283-24799466	ENSG00000001460.12,C1orf201,coding,chr1:24683488-24743424	0.237455	8	0.606578
ENSG00000001461.11,NIPAL3,coding,chr1:24742283-24799466	ENSG00000006555.6,TTC22,coding,chr1:55245384-55266940	0.222607	9	0.606578
ENSG00000001461.11,NIPAL3,coding,chr1:24742283-24799466	ENSG00000005884.11,ITGA3,coding,chr17:48133331-48167848	0.215181	10	0.606578
ENSG00000001461.11,NIPAL3,coding,chr1:24742283-24799466	ENSG00000001497.12,LAS1L,coding,chrX:64732461-64754655	-0.210144	11	0.606578
ENSG00000001461.11,NIPAL3,coding,chr1:24742283-24799466	ENSG00000100206.4,DMC1,coding,chr22:38914953-38966291	-0.195637	12	0.606578
ENSG00000001461.11,NIPAL3,coding,chr1:24742283-24799466	ENSG00000007237.10,GAS7,coding,chr17:9813925-10101868	-0.126052	13	0.606578
ENSG00000001461.11,NIPAL3,coding,chr1:24742283-24799466	ENSG00000005448.12,WDR54,coding,chr2:74648804-74652882	-0.113307	14	0.606578
ENSG00000001461.11,NIPAL3,coding,chr1:24742283-24799466	ENSG00000002330.8,BAD,coding,chr11:64037301-64052176	-0.105823	15	0.606578
ENSG00000001461.11,NIPAL3,coding,chr1:24742283-24799466	ENSG00000004897.5,CDC27,coding,chr17:45195068-45266788	0.0785656	16	0.606578
ENSG00000001461.11,NIPAL3,coding,chr1:24742283-24799466	ENSG00000018408.10,WWTR1,coding,chr3:149235021-149454501	-0.0637208	17	0.606578
ENSG00000001461.11,NIPAL3,coding,chr1:24742283-24799466	ENSG00000063180.3,CA11,coding,chr19:49141271-49149451	0.0443572	18	0.606578
ENSG00000001461.11,NIPAL3,coding,chr1:24742283-24799466	ENSG00000004838.9,ZMYND10,coding,chr3:50378540-50384283	-0.00484883	19	0.606578
ENSG00000001497.12,LAS1L,coding,chrX:64732461-64754655	ENSG00000007080.5,CCDC124,coding,chr19:18043823-18054793	0.484183	1	0.751768
ENSG00000001497.12,LAS1L,coding,chrX:64732461-64754655	ENSG00000105401.1,CDC37,coding,chr19:10501808-10514271	0.41793	2	0.751768
ENSG00000001497.12,LAS1L,coding,chrX:64732461-64754655	ENSG00000006712.9,PAF1,coding,chr19:39876274-39881757	0.401518	3	0.751768
ENSG00000001497.12,LAS1L,coding,chrX:64732461-64754655	ENSG00000006744.10,ELAC2,coding,chr17:12894929-12921381	0.328998	4	0.751768
ENSG00000001497.12,LAS1L,coding,chrX:64732461-64754655	ENSG00000005108.8,THSD7A,coding,chr7:11410063-11871824	-0.318411	5	0.751768
ENSG00000001497.12,LAS1L,coding,chrX:64732461-64754655	ENSG00000011143.11,MKS1,coding,chr17:56282798-56296966	0.317859	6	0.751768
ENSG00000001497.12,LAS1L,coding,chrX:64732461-64754655	ENSG00000002822.9,MAD1L1,coding,chr7:1855382-2272878	0.311731	7	0.751768
ENSG00000001497.12,LAS1L,coding,chrX:64732461-64754655	ENSG00000082458.7,DLG3,coding,chrX:69664710-69725337	0.268118	8	0.751768
ENSG00000001497.12,LAS1L,coding,chrX:64732461-64754655	ENSG00000007062.7,PROM1,coding,chr4:15964698-16086001	-0.25681	9	0.751768
ENSG00000001497.12,LAS1L,coding,chrX:64732461-64754655	ENSG00000004487.10,KDM1A,coding,chr1:23345940-23410182	0.254413	10	0.751768
ENSG00000001497.12,LAS1L,coding,chrX:64732461-64754655	ENSG00000000457.8,SCYL3,coding,chr1:169821803-169863408	-0.236554	11	0.751768
ENSG00000001497.12,LAS1L,coding,chrX:64732461-64754655	ENSG00000005156.5,LIG3,coding,chr17:33307541-33332083	0.231552	12	0.751768
ENSG00000001497.12,LAS1L,coding,chrX:64732461-64754655	ENSG00000001629.5,ANKIB1,coding,chr7:91875547-92030698	-0.213485	13	0.751768
ENSG00000001497.12,LAS1L,coding,chrX:64732461-64754655	ENSG00000001461.11,NIPAL3,coding,chr1:24742283-24799466	-0.210144	14	0.751768
ENSG00000001497.12,LAS1L,coding,chrX:64732461-64754655	ENSG00000123358.14,NR4A1,coding,chr12:52416615-52453291	-0.196619	15	0.751768
ENSG00000001497.12,LAS1L,coding,chrX:64732461-64754655	ENSG00000006007.7,GDE1,coding,chr16:19513014-19533467	-0.18725	16	0.751768
ENSG00000001497.12,LAS1L,coding,chrX:64732461-64754655	ENSG00000064547.8,LPAR2,coding,chr19:19734467-19739739	0.170776	17	0.751768
ENSG00000001497.12,LAS1L,coding,chrX:64732461-64754655	ENSG00000100722.12,ZC3H14,coding,chr14:89029252-89079853	0.163433	18	0.751768
ENSG00000001497.12,LAS1L,coding,chrX:64732461-64754655	ENSG00000147133.9,TAF1,coding,chrX:70586113-70752224	0.152973	19	0.751768
ENSG00000001497.12,LAS1L,coding,chrX:64732461-64754655	ENSG00000017621.11,MAGIX,coding,chrX:49019060-49024822	0.145933	20	0.751768
ENSG00000001497.12,LAS1L,coding,chrX:64732461-64754655	ENSG00000005022.5,SLC25A5,coding,chrX:118602362-118605282	0.143743	21	0.751768
ENSG00000001497.12,LAS1L,coding,chrX:64732461-64754655	ENSG00000000460.11,C1orf112,coding,chr1:169631244-169823221	0.130348	22	0.751768
ENSG00000001497.12,LAS1L,coding,chrX:64732461-64754655	ENSG00000001631.9,KRIT1,coding,chr7:91828282-91875480	-0.0972141	23	0.751768
ENSG00000001497.12,LAS1L,coding,chrX:64732461-64754655	ENSG00000001460.12,C1orf201,coding,chr1:24683488-24743424	0.0787148	24	0.751768
ENSG00000001561.5,ENPP4,coding,chr6:46097700-46114435	ENSG00000112796.4,ENPP5,coding,chr6:46128151-46138708	0.695141	1	0.85582
ENSG00000001561.5,ENPP4,coding,chr6:46097700-46114435	ENSG00000127995.12,CASD1,coding,chr7:94138530-94186331	0.617775	2	0.85582
ENSG00000001561.5,ENPP4,coding,chr6:46097700-46114435	ENSG00000005893.11,LAMP2,coding,chrX:119561681-119603220	0.606735	3	0.85582
ENSG00000001561.5,ENPP4,coding,chr6:46097700-46114435	ENSG00000006459.6,JHDM1D,coding,chr7:139784545-139876835	0.601614	4	0.85582
ENSG00000001561.5,ENPP4,coding,chr6:46097700-46114435	ENSG00000005700.10,IBTK,coding,chr6:82879699-82957471	0.555458	5	0.85582
ENSG00000001561.5,ENPP4,coding,chr6:46097700-46114435	ENSG00000001629.5,ANKIB1,coding,chr7:91875547-92030698	0.550999	6	0.85582
ENSG00000001561.5,ENPP4,coding,chr6:46097700-46114435	ENSG00000000457.8,SCYL3,coding,chr1:169821803-169863408	0.511736	7	0.85582
ENSG00000001561.5,ENPP4,coding,chr6:46097700-46114435	ENSG00000008283.10,CYB561,coding,chr17:61509667-61523722	0.486744	8	0.85582
ENSG00000001561.5,ENPP4,coding,chr6:46097700-46114435	ENSG00000007944.10,MYLIP,coding,chr6:16129355-16148479	0.451375	9	0.85582
ENSG00000001561.5,ENPP4,coding,chr6:46097700-46114435	ENSG00000000419.7,DPM1,coding,chr20:49551403-49575092	0.398528	10	0.85582
ENSG00000001561.5,ENPP4,coding,chr6:46097700-46114435	ENSG00000001036.8,FUCA2,coding,chr6:143816613-143832827	0.352243	11	0.85582
ENSG00000001561.5,ENPP4,coding,chr6:46097700-46114435	ENSG00000050820.12,BCAR1,coding,chr16:75262927-75301951	-0.324159	12	0.85582
ENSG00000001561.5,ENPP4,coding,chr6:46097700-46114435	ENSG00000112782.10,CLIC5,coding,chr6:45848749-46048132	0.323931	13	0.85582
ENSG00000001561.5,ENPP4,coding,chr6:46097700-46114435	ENSG00000005801.11,ZNF195,coding,chr11:3360490-3400448	0.319998	14	0.85582
ENSG00000001561.5,ENPP4,coding,chr6:46097700-46114435	ENSG00000037897.12,METTL1,coding,chr12:58162253-58166576	-0.304595	15	0.85582
ENSG00000001561.5,ENPP4,coding,chr6:46097700-46114435	ENSG00000002330.8,BAD,coding,chr11:64037301-64052176	0.294848	16	0.85582
ENSG00000001561.5,ENPP4,coding,chr6:46097700-46114435	ENSG00000001460.12,C1orf201,coding,chr1:24683488-24743424	0.290349	17	0.85582
ENSG00000001561.5,ENPP4,coding,chr6:46097700-46114435	ENSG00000000003.9,TSPAN6,coding,chrX:99883666-99894988	0.280846	18	0.85582
ENSG00000001561.5,ENPP4,coding,chr6:46097700-46114435	ENSG00000100979.10,PLTP,coding,chr20:44527398-44540794	-0.237334	19	0.85582
ENSG00000001561.5,ENPP4,coding,chr6:46097700-46114435	ENSG00000006453.9,BAIAP2L1.1,coding,chr7:97920962-98030380	0.231749	20	0.85582
ENSG00000001561.5,ENPP4,coding,chr6:46097700-46114435	ENSG00000005884.11,ITGA3,coding,chr17:48133331-48167848	-0.229524	21	0.85582
ENSG00000001561.5,ENPP4,coding,chr6:46097700-46114435	ENSG00000002745.7,WNT16,coding,chr7:120965420-120981158	-0.185568	22	0.85582
ENSG00000001561.5,ENPP4,coding,chr6:46097700-46114435	ENSG00000000460.11,C1orf112,coding,chr1:169631244-169823221	0.185191	23	0.85582
ENSG00000001561.5,ENPP4,coding,chr6:46097700-46114435	ENSG00000160199.8,PKNOX1,coding,chr21:44394619-44454172	-0.18112	24	0.85582
ENSG00000001561.5,ENPP4,coding,chr6:46097700-46114435	ENSG00000002016.11,RAD52,coding,chr12:1021242-1100356	0.098004	25	0.85582
ENSG00000001617.7,SEMA3F,coding,chr3:50192477-50226508	ENSG00000068001.9,HYAL2,coding,chr3:50355220-50360337	0.51226	1	0.60329
ENSG00000001617.7,SEMA3F,coding,chr3:50192477-50226508	ENSG00000004897.5,CDC27,coding,chr17:45195068-45266788	-0.415712	2	0.60329
ENSG00000001617.7,SEMA3F,coding,chr3:50192477-50226508	ENSG00000007402.7,CACNA2D2,coding,chr3:50400232-50541675	0.388348	3	0.60329
ENSG00000001617.7,SEMA3F,coding,chr3:50192477-50226508	ENSG00000001036.8,FUCA2,coding,chr6:143816613-143832827	-0.352779	4	0.60329
ENSG00000001617.7,SEMA3F,coding,chr3:50192477-50226508	ENSG00000155066.11,PROM2,coding,chr2:95940200-95957056	0.310238	5	0.60329
ENSG00000001617.7,SEMA3F,coding,chr3:50192477-50226508	ENSG00000006016.5,CRLF1,coding,chr19:18704036-18717660	0.278619	6	0.60329
ENSG00000001617.7,SEMA3F,coding,chr3:50192477-50226508	ENSG00000000419.7,DPM1,coding,chr20:49551403-49575092	-0.277776	7	0.60329
ENSG00000001617.7,SEMA3F,coding,chr3:50192477-50226508	ENSG00000001084.6,GCLC,coding,chr6:53362138-53481768	-0.261914	8	0.60329
ENSG00000001617.7,SEMA3F,coding,chr3:50192477-50226508	ENSG00000005001.3,PRSS22,coding,chr16:2902727-2908171	0.254989	9	0.60329
ENSG00000001617.7,SEMA3F,coding,chr3:50192477-50226508	ENSG00000005379.10,BZRAP1,coding,chr17:56378597-56406152	0.233934	10	0.60329
ENSG00000001617.7,SEMA3F,coding,chr3:50192477-50226508	ENSG00000151651.11,ADAM8,coding,chr10:135075906-135090372	0.217043	11	0.60329
ENSG00000001617.7,SEMA3F,coding,chr3:50192477-50226508	ENSG00000002834.11,LASP1,coding,chr17:37026255-37078023	0.166424	12	0.60329
ENSG00000001617.7,SEMA3F,coding,chr3:50192477-50226508	ENSG00000013275.2,PSMC4,coding,chr19:40477072-40487351	-0.15414	13	0.60329
ENSG00000001617.7,SEMA3F,coding,chr3:50192477-50226508	ENSG00000000938.7,FGR,coding,chr1:27938574-27961788	-0.141413	14	0.60329
ENSG00000001617.7,SEMA3F,coding,chr3:50192477-50226508	ENSG00000047849.17,MAP4,coding,chr3:47892181-48130769	0.128309	15	0.60329
ENSG00000001617.7,SEMA3F,coding,chr3:50192477-50226508	ENSG00000005249.6,PRKAR2B,coding,chr7:106685093-106802256	0.0555132	16	0.60329
ENSG00000001626.8,CFTR,coding,chr7:117105837-117308719	ENSG00000093134.8,VNN3,coding,chr6:133043922-133055904	0.413681	1	0.398239
ENSG00000001626.8,CFTR,coding,chr7:117105837-117308719	ENSG00000019102.7,VSIG2,coding,chr11:124617367-124622134	0.391754	2	0.398239
ENSG00000001626.8,CFTR,coding,chr7:117105837-117308719	ENSG00000077063.6,CTTNBP2,coding,chr7:117350704-117514193	0.37176	3	0.398239
ENSG00000001626.8,CFTR,coding,chr7:117105837-117308719	ENSG00000008226.15,DLEC1,coding,chr3:38080695-38165516	0.370645	4	0.398239
ENSG00000001626.8,CFTR,coding,chr7:117105837-117308719	ENSG00000003147.13,ICA1,coding,chr7:8152813-8302317	0.367591	5	0.398239
ENSG00000001626.8,CFTR,coding,chr7:117105837-117308719	ENSG00000000971.10,CFH,coding,chr1:196621007-196716634	0.27646	6	0.398239
ENSG00000001626.8,CFTR,coding,chr7:117105837-117308719	ENSG00000002726.14,ABP1,coding,chr7:150521714-150558592	0.188287	7	0.398239
ENSG00000001629.5,ANKIB1,coding,chr7:91875547-92030698	ENSG00000001631.9,KRIT1,coding,chr7:91828282-91875480	0.820048	1	0.872546
ENSG00000001629.5,ANKIB1,coding,chr7:91875547-92030698	ENSG00000004766.11,CCDC132,coding,chr7:92861652-92988338	0.813195	2	0.872546
ENSG00000001629.5,ANKIB1,coding,chr7:91875547-92030698	ENSG00000005889.10,ZFX,coding,chrX:24167289-24234372	0.701429	3	0.872546
ENSG00000001629.5,ANKIB1,coding,chr7:91875547-92030698	ENSG00000003393.10,ALS2,coding,chr2:202565276-202645912	0.691956	4	0.872546
ENSG00000001629.5,ANKIB1,coding,chr7:91875547-92030698	ENSG00000006634.3,DBF4,coding,chr7:87505530-87538856	0.658661	5	0.872546
ENSG00000001629.5,ANKIB1,coding,chr7:91875547-92030698	ENSG00000000419.7,DPM1,coding,chr20:49551403-49575092	0.558063	6	0.872546
ENSG00000001629.5,ANKIB1,coding,chr7:91875547-92030698	ENSG00000001561.5,ENPP4,coding,chr6:46097700-46114435	0.550999	7	0.872546
ENSG00000001629.5,ANKIB1,coding,chr7:91875547-92030698	ENSG00000000457.8,SCYL3,coding,chr1:169821803-169863408	0.475265	8	0.872546
ENSG00000001629.5,ANKIB1,coding,chr7:91875547-92030698	ENSG00000001167.10,NFYA,coding,chr6:41040683-41067715	0.466976	9	0.872546
ENSG00000001629.5,ANKIB1,coding,chr7:91875547-92030698	ENSG00000001084.6,GCLC,coding,chr6:53362138-53481768	0.374973	10	0.872546
ENSG00000001629.5,ANKIB1,coding,chr7:91875547-92030698	ENSG00000000003.9,TSPAN6,coding,chrX:99883666-99894988	0.274814	11	0.872546
ENSG00000001629.5,ANKIB1,coding,chr7:91875547-92030698	ENSG00000089280.12,FUS,coding,chr16:31191430-31203127	-0.242003	12	0.872546
ENSG00000001629.5,ANKIB1,coding,chr7:91875547-92030698	ENSG00000001497.12,LAS1L,coding,chrX:64732461-64754655	-0.213485	13	0.872546
ENSG00000001629.5,ANKIB1,coding,chr7:91875547-92030698	ENSG00000021762.14,OSBPL5,coding,chr11:3108345-3187969	-0.151356	14	0.872546
ENSG00000001629.5,ANKIB1,coding,chr7:91875547-92030698	ENSG00000129451.6,KLK10,coding,chr19:51516000-51523431	0.0833856	15	0.872546
ENSG00000001629.5,ANKIB1,coding,chr7:91875547-92030698	ENSG00000002587.5,HS3ST1,coding,chr4:11394773-11431389	0.0645976	16	0.872546
ENSG00000001629.5,ANKIB1,coding,chr7:91875547-92030698	ENSG00000002330.8,BAD,coding,chr11:64037301-64052176	0.0238695	17	0.872546
ENSG00000001630.10,CYP51A1,coding,chr7:91741464-91772266	ENSG00000003056.3,M6PR,coding,chr12:9092958-9102551	0.681067	1	0.813675
ENSG00000001630.10,CYP51A1,coding,chr7:91741464-91772266	ENSG00000077809.7,GTF2I,coding,chr7:74071993-74175026	0.645563	2	0.813675
ENSG00000001630.10,CYP51A1,coding,chr7:91741464-91772266	ENSG00000005022.5,SLC25A5,coding,chrX:118602362-118605282	0.630505	3	0.813675
ENSG00000001630.10,CYP51A1,coding,chr7:91741464-91772266	ENSG00000112972.9,HMGCS1,coding,chr5:43289496-43313614	0.514302	4	0.813675
ENSG00000001630.10,CYP51A1,coding,chr7:91741464-91772266	ENSG00000136146.8,MED4,coding,chr13:48627458-48669267	-0.409789	5	0.813675
ENSG00000001630.10,CYP51A1,coding,chr7:91741464-91772266	ENSG00000002330.8,BAD,coding,chr11:64037301-64052176	-0.405711	6	0.813675
ENSG00000001630.10,CYP51A1,coding,chr7:91741464-91772266	ENSG00000003509.11,C2orf56,coding,chr2:37458773-37480546	-0.405202	7	0.813675
ENSG00000001630.10,CYP51A1,coding,chr7:91741464-91772266	ENSG00000093217.5,XYLB,coding,chr3:38388250-38462839	0.385867	8	0.813675
ENSG00000001630.10,CYP51A1,coding,chr7:91741464-91772266	ENSG00000002549.7,LAP3,coding,chr4:17578814-17609595	0.369778	9	0.813675
ENSG00000001630.10,CYP51A1,coding,chr7:91741464-91772266	ENSG00000000457.8,SCYL3,coding,chr1:169821803-169863408	0.3517	10	0.813675
ENSG00000001630.10,CYP51A1,coding,chr7:91741464-91772266	ENSG00000000460.11,C1orf112,coding,chr1:169631244-169823221	0.296655	11	0.813675
ENSG00000001630.10,CYP51A1,coding,chr7:91741464-91772266	ENSG00000002016.11,RAD52,coding,chr12:1021242-1100356	-0.24855	12	0.813675
ENSG00000001630.10,CYP51A1,coding,chr7:91741464-91772266	ENSG00000003393.10,ALS2,coding,chr2:202565276-202645912	0.243213	13	0.813675
ENSG00000001630.10,CYP51A1,coding,chr7:91741464-91772266	ENSG00000005483.13,MLL5,coding,chr7:104654625-104754808	0.217947	14	0.813675
ENSG00000001630.10,CYP51A1,coding,chr7:91741464-91772266	ENSG00000001084.6,GCLC,coding,chr6:53362138-53481768	0.212275	15	0.813675
ENSG00000001630.10,CYP51A1,coding,chr7:91741464-91772266	ENSG00000001036.8,FUCA2,coding,chr6:143816613-143832827	-0.200937	16	0.813675
ENSG00000001630.10,CYP51A1,coding,chr7:91741464-91772266	ENSG00000002933.3,TMEM176A,coding,chr7:150497490-150502208	-0.179612	17	0.813675
ENSG00000001630.10,CYP51A1,coding,chr7:91741464-91772266	ENSG00000011600.4,TYROBP,coding,chr19:36395311-36399211	-0.172183	18	0.813675
ENSG00000001630.10,CYP51A1,coding,chr7:91741464-91772266	ENSG00000000003.9,TSPAN6,coding,chrX:99883666-99894988	-0.168806	19	0.813675
ENSG00000001630.10,CYP51A1,coding,chr7:91741464-91772266	ENSG00000111596.7,CNOT2,coding,chr12:70636773-70748773	-0.159512	20	0.813675
ENSG00000001630.10,CYP51A1,coding,chr7:91741464-91772266	ENSG00000258436.1,RNASE12.1,coding,chr14:21058351-21058982	0.0690873	21	0.813675
ENSG00000001630.10,CYP51A1,coding,chr7:91741464-91772266	ENSG00000005175.5,RPAP3,coding,chr12:48057069-48099844	-0.0233193	22	0.813675
ENSG00000001630.10,CYP51A1,coding,chr7:91741464-91772266	ENSG00000006634.3,DBF4,coding,chr7:87505530-87538856	-0.0175872	23	0.813675
ENSG00000001631.9,KRIT1,coding,chr7:91828282-91875480	ENSG00000105793.10,GTPBP10,coding,chr7:89964536-90020769	0.845596	1	0.892604
ENSG00000001631.9,KRIT1,coding,chr7:91828282-91875480	ENSG00000004766.11,CCDC132,coding,chr7:92861652-92988338	0.837576	2	0.892604
ENSG00000001631.9,KRIT1,coding,chr7:91828282-91875480	ENSG00000001629.5,ANKIB1,coding,chr7:91875547-92030698	0.820048	3	0.892604
ENSG00000001631.9,KRIT1,coding,chr7:91828282-91875480	ENSG00000135164.13,DMTF1,coding,chr7:86781676-86825646	0.699998	4	0.892604
ENSG00000001631.9,KRIT1,coding,chr7:91828282-91875480	ENSG00000004864.8,SLC25A13,coding,chr7:95749531-95951459	0.665201	5	0.892604
ENSG00000001631.9,KRIT1,coding,chr7:91828282-91875480	ENSG00000000419.7,DPM1,coding,chr20:49551403-49575092	0.592217	6	0.892604
ENSG00000001631.9,KRIT1,coding,chr7:91828282-91875480	ENSG00000011454.11,RABGAP1,coding,chr9:125703111-125867145	0.54126	7	0.892604
ENSG00000001631.9,KRIT1,coding,chr7:91828282-91875480	ENSG00000013441.10,CLK1,coding,chr2:201717731-201729467	0.522476	8	0.892604
ENSG00000001631.9,KRIT1,coding,chr7:91828282-91875480	ENSG00000000457.8,SCYL3,coding,chr1:169821803-169863408	0.52229	9	0.892604
ENSG00000001631.9,KRIT1,coding,chr7:91828282-91875480	ENSG00000002016.11,RAD52,coding,chr12:1021242-1100356	0.515362	10	0.892604
ENSG00000001631.9,KRIT1,coding,chr7:91828282-91875480	ENSG00000005893.11,LAMP2,coding,chrX:119561681-119603220	0.397496	11	0.892604
ENSG00000001631.9,KRIT1,coding,chr7:91828282-91875480	ENSG00000006695.5,COX10,coding,chr17:13972845-14111994	0.322815	12	0.892604
ENSG00000001631.9,KRIT1,coding,chr7:91828282-91875480	ENSG00000006432.10,MAP3K9,coding,chr14:71189242-71276251	0.251871	13	0.892604
ENSG00000001631.9,KRIT1,coding,chr7:91828282-91875480	ENSG00000005001.3,PRSS22,coding,chr16:2902727-2908171	-0.232958	14	0.892604
ENSG00000001631.9,KRIT1,coding,chr7:91828282-91875480	ENSG00000000003.9,TSPAN6,coding,chrX:99883666-99894988	0.223607	15	0.892604
ENSG00000001631.9,KRIT1,coding,chr7:91828282-91875480	ENSG00000002330.8,BAD,coding,chr11:64037301-64052176	0.187789	16	0.892604
ENSG00000001631.9,KRIT1,coding,chr7:91828282-91875480	ENSG00000106290.10,TAF6,coding,chr7:99704692-99717464	0.152811	17	0.892604
ENSG00000001631.9,KRIT1,coding,chr7:91828282-91875480	ENSG00000002587.5,HS3ST1,coding,chr4:11394773-11431389	-0.092112	18	0.892604
ENSG00000001631.9,KRIT1,coding,chr7:91828282-91875480	ENSG00000001630.10,CYP51A1,coding,chr7:91741464-91772266	0.0419212	19	0.892604
ENSG00000002016.11,RAD52,coding,chr12:1021242-1100356	ENSG00000061936.4,SFSWAP,coding,chr12:132195625-132284282	0.610878	1	0.821398
ENSG00000002016.11,RAD52,coding,chr12:1021242-1100356	ENSG00000003756.11,RBM5,coding,chr3:50126340-50156454	0.593653	2	0.821398
ENSG00000002016.11,RAD52,coding,chr12:1021242-1100356	ENSG00000094914.8,AAAS,coding,chr12:53701239-53718648	0.565302	3	0.821398
ENSG00000002016.11,RAD52,coding,chr12:1021242-1100356	ENSG00000011021.17,CLCN6,coding,chr1:11866206-11903201	0.558369	4	0.821398
ENSG00000002016.11,RAD52,coding,chr12:1021242-1100356	ENSG00000013573.11,DDX11,coding,chr12:31226778-31257725	0.538121	5	0.821398
ENSG00000002016.11,RAD52,coding,chr12:1021242-1100356	ENSG00000001631.9,KRIT1,coding,chr7:91828282-91875480	0.515362	6	0.821398
ENSG00000002016.11,RAD52,coding,chr12:1021242-1100356	ENSG00000005379.10,BZRAP1,coding,chr17:56378597-56406152	0.463101	7	0.821398
ENSG00000002016.11,RAD52,coding,chr12:1021242-1100356	ENSG00000004777.10,ARHGAP33,coding,chr19:36266416-36279724	0.457155	8	0.821398
ENSG00000002016.11,RAD52,coding,chr12:1021242-1100356	ENSG00000003393.10,ALS2,coding,chr2:202565276-202645912	0.406646	9	0.821398
ENSG00000002016.11,RAD52,coding,chr12:1021242-1100356	ENSG00000001629.5,ANKIB1,coding,chr7:91875547-92030698	0.396521	10	0.821398
ENSG00000002016.11,RAD52,coding,chr12:1021242-1100356	ENSG00000124523.9,SIRT5,coding,chr6:13574825-13612524	0.395376	11	0.821398
ENSG00000002016.11,RAD52,coding,chr12:1021242-1100356	ENSG00000009830.6,POMT2,coding,chr14:77741298-77787227	0.353568	12	0.821398
ENSG00000002016.11,RAD52,coding,chr12:1021242-1100356	ENSG00000021488.7,SLC7A9,coding,chr19:33321420-33360683	0.351954	13	0.821398
ENSG00000002016.11,RAD52,coding,chr12:1021242-1100356	ENSG00000001167.10,NFYA,coding,chr6:41040683-41067715	0.295945	14	0.821398
ENSG00000002016.11,RAD52,coding,chr12:1021242-1100356	ENSG00000006831.9,ADIPOR2,coding,chr12:1797739-1897844	0.285967	15	0.821398
ENSG00000002016.11,RAD52,coding,chr12:1021242-1100356	ENSG00000000460.11,C1orf112,coding,chr1:169631244-169823221	0.261716	16	0.821398
ENSG00000002016.11,RAD52,coding,chr12:1021242-1100356	ENSG00000001630.10,CYP51A1,coding,chr7:91741464-91772266	-0.24855	17	0.821398
ENSG00000002016.11,RAD52,coding,chr12:1021242-1100356	ENSG00000006062.8,MAP3K14,coding,chr17:43340487-43394414	0.238321	18	0.821398
ENSG00000002016.11,RAD52,coding,chr12:1021242-1100356	ENSG00000000457.8,SCYL3,coding,chr1:169821803-169863408	0.200954	19	0.821398
ENSG00000002016.11,RAD52,coding,chr12:1021242-1100356	ENSG00000002549.7,LAP3,coding,chr4:17578814-17609595	-0.19175	20	0.821398
ENSG00000002016.11,RAD52,coding,chr12:1021242-1100356	ENSG00000004478.5,FKBP4,coding,chr12:2904118-2914576	0.134771	21	0.821398
ENSG00000002016.11,RAD52,coding,chr12:1021242-1100356	ENSG00000003400.10,CASP10,coding,chr2:202047603-202094129	0.131713	22	0.821398
ENSG00000002016.11,RAD52,coding,chr12:1021242-1100356	ENSG00000001497.12,LAS1L,coding,chrX:64732461-64754655	0.126573	23	0.821398
ENSG00000002016.11,RAD52,coding,chr12:1021242-1100356	ENSG00000010244.10,ZNF207,coding,chr17:30677149-30714780	0.108181	24	0.821398
ENSG00000002016.11,RAD52,coding,chr12:1021242-1100356	ENSG00000002330.8,BAD,coding,chr11:64037301-64052176	0.0711156	25	0.821398
ENSG00000002016.11,RAD52,coding,chr12:1021242-1100356	ENSG00000106560.6,GIMAP2,coding,chr7:150382784-150390729	0.00363819	26	0.821398
ENSG00000002330.8,BAD,coding,chr11:64037301-64052176	ENSG00000005075.11,POLR2J,coding,chr7:102113564-102119354	0.565938	1	0.807873
ENSG00000002330.8,BAD,coding,chr11:64037301-64052176	ENSG00000110011.9,DNAJC4,coding,chr11:63997749-64001758	0.4895	2	0.807873
ENSG00000002330.8,BAD,coding,chr11:64037301-64052176	ENSG00000105879.4,CBLL1,coding,chr7:107384141-107401142	-0.473891	3	0.807873
ENSG00000002330.8,BAD,coding,chr11:64037301-64052176	ENSG00000003056.3,M6PR,coding,chr12:9092958-9102551	-0.469353	4	0.807873
ENSG00000002330.8,BAD,coding,chr11:64037301-64052176	ENSG00000001630.10,CYP51A1,coding,chr7:91741464-91772266	-0.405711	5	0.807873
ENSG00000002330.8,BAD,coding,chr11:64037301-64052176	ENSG00000003249.8,DBNDD1,coding,chr16:90071272-90086536	0.322826	6	0.807873
ENSG00000002330.8,BAD,coding,chr11:64037301-64052176	ENSG00000173264.8,GPR137,coding,chr11:64037533-64056972	0.322821	7	0.807873
ENSG00000002330.8,BAD,coding,chr11:64037301-64052176	ENSG00000004534.9,RBM6,coding,chr3:49977439-50137478	0.31218	8	0.807873
ENSG00000002330.8,BAD,coding,chr11:64037301-64052176	ENSG00000001036.8,FUCA2,coding,chr6:143816613-143832827	0.309399	9	0.807873
ENSG00000002330.8,BAD,coding,chr11:64037301-64052176	ENSG00000001460.12,C1orf201,coding,chr1:24683488-24743424	0.298665	10	0.807873
ENSG00000002330.8,BAD,coding,chr11:64037301-64052176	ENSG00000001561.5,ENPP4,coding,chr6:46097700-46114435	0.294848	11	0.807873
ENSG00000002330.8,BAD,coding,chr11:64037301-64052176	ENSG00000005243.4,COPZ2,coding,chr17:46103534-46115139	0.294837	12	0.807873
ENSG00000002330.8,BAD,coding,chr11:64037301-64052176	ENSG00000004779.4,NDUFAB1,coding,chr16:23592322-23607677	0.279465	13	0.807873
ENSG00000002330.8,BAD,coding,chr11:64037301-64052176	ENSG00000004059.5,ARF5,coding,chr7:127228398-127231759	0.238546	14	0.807873
ENSG00000002330.8,BAD,coding,chr11:64037301-64052176	ENSG00000121653.6,MAPK8IP1,coding,chr11:45907201-45928016	0.232356	15	0.807873
ENSG00000002330.8,BAD,coding,chr11:64037301-64052176	ENSG00000004777.10,ARHGAP33,coding,chr19:36266416-36279724	0.220669	16	0.807873
ENSG00000002330.8,BAD,coding,chr11:64037301-64052176	ENSG00000011332.13,DPF1,coding,chr19:38701645-38720354	0.218914	17	0.807873
ENSG00000002330.8,BAD,coding,chr11:64037301-64052176	ENSG00000131375.5,CAPN7,coding,chr3:15247658-15294425	0.205261	18	0.807873
ENSG00000002330.8,BAD,coding,chr11:64037301-64052176	ENSG00000000003.9,TSPAN6,coding,chrX:99883666-99894988	0.203619	19	0.807873
ENSG00000002330.8,BAD,coding,chr11:64037301-64052176	ENSG00000005486.10,RHBDD2,coding,chr7:75471919-75518244	0.188761	20	0.807873
ENSG00000002330.8,BAD,coding,chr11:64037301-64052176	ENSG00000131876.12,SNRPA1,coding,chr15:101821714-101835487	0.167776	21	0.807873
ENSG00000002330.8,BAD,coding,chr11:64037301-64052176	ENSG00000002822.9,MAD1L1,coding,chr7:1855382-2272878	0.165752	22	0.807873
ENSG00000002330.8,BAD,coding,chr11:64037301-64052176	ENSG00000004766.11,CCDC132,coding,chr7:92861652-92988338	0.152699	23	0.807873
ENSG00000002330.8,BAD,coding,chr11:64037301-64052176	ENSG00000001167.10,NFYA,coding,chr6:41040683-41067715	-0.13077	24	0.807873
ENSG00000002330.8,BAD,coding,chr11:64037301-64052176	ENSG00000001461.11,NIPAL3,coding,chr1:24742283-24799466	-0.105823	25	0.807873
ENSG00000002330.8,BAD,coding,chr11:64037301-64052176	ENSG00000003756.11,RBM5,coding,chr3:50126340-50156454	0.0880615	26	0.807873
ENSG00000002330.8,BAD,coding,chr11:64037301-64052176	ENSG00000110104.5,CCDC86,coding,chr11:60609543-60618554	0.0554361	27	0.807873
ENSG00000002330.8,BAD,coding,chr11:64037301-64052176	ENSG00000125124.6,BBS2,coding,chr16:56500747-56554195	-0.00981314	28	0.807873
ENSG00000002549.7,LAP3,coding,chr4:17578814-17609595	ENSG00000003056.3,M6PR,coding,chr12:9092958-9102551	0.53586	1	0.855874
ENSG00000002549.7,LAP3,coding,chr4:17578814-17609595	ENSG00000004468.6,CD38,coding,chr4:15779897-15851069	0.521858	2	0.855874
ENSG00000002549.7,LAP3,coding,chr4:17578814-17609595	ENSG00000005810.12,MYCBP2,coding,chr13:77618791-77901185	0.501065	3	0.855874
ENSG00000002549.7,LAP3,coding,chr4:17578814-17609595	ENSG00000005022.5,SLC25A5,coding,chrX:118602362-118605282	0.486117	4	0.855874
ENSG00000002549.7,LAP3,coding,chr4:17578814-17609595	ENSG00000100412.10,ACO2,coding,chr22:41865116-41924993	0.475002	5	0.855874
ENSG00000002549.7,LAP3,coding,chr4:17578814-17609595	ENSG00000010030.9,ETV7,coding,chr6:36322418-36356164	0.457505	6	0.855874
ENSG00000002549.7,LAP3,coding,chr4:17578814-17609595	ENSG00000055332.10,EIF2AK2,coding,chr2:37326352-37384208	0.427086	7	0.855874
ENSG00000002549.7,LAP3,coding,chr4:17578814-17609595	ENSG00000001630.10,CYP51A1,coding,chr7:91741464-91772266	0.369778	8	0.855874
ENSG00000002549.7,LAP3,coding,chr4:17578814-17609595	ENSG00000071127.11,WDR1,coding,chr4:10075962-10118573	0.368246	9	0.855874
ENSG00000002549.7,LAP3,coding,chr4:17578814-17609595	ENSG00000050130.12,JKAMP,coding,chr14:59951160-59971429	0.321343	10	0.855874
ENSG00000002549.7,LAP3,coding,chr4:17578814-17609595	ENSG00000000419.7,DPM1,coding,chr20:49551403-49575092	0.314606	11	0.855874
ENSG00000002549.7,LAP3,coding,chr4:17578814-17609595	ENSG00000100626.10,GALNTL1,coding,chr14:69725993-69821183	-0.313775	12	0.855874
ENSG00000002549.7,LAP3,coding,chr4:17578814-17609595	ENSG00000025770.13,NCAPH2,coding,chr22:50946644-50963063	-0.273748	13	0.855874
ENSG00000002549.7,LAP3,coding,chr4:17578814-17609595	ENSG00000000938.7,FGR,coding,chr1:27938574-27961788	0.238719	14	0.855874
ENSG00000002549.7,LAP3,coding,chr4:17578814-17609595	ENSG00000067606.11,PRKCZ,coding,chr1:1981908-2116834	0.232841	15	0.855874
ENSG00000002549.7,LAP3,coding,chr4:17578814-17609595	ENSG00000005073.5,HOXA11,coding,chr7:27221128-27224842	-0.208929	16	0.855874
ENSG00000002549.7,LAP3,coding,chr4:17578814-17609595	ENSG00000001084.6,GCLC,coding,chr6:53362138-53481768	0.205279	17	0.855874
ENSG00000002549.7,LAP3,coding,chr4:17578814-17609595	ENSG00000066084.7,DIP2B,coding,chr12:50898767-51142450	0.20307	18	0.855874
ENSG00000002549.7,LAP3,coding,chr4:17578814-17609595	ENSG00000001461.11,NIPAL3,coding,chr1:24742283-24799466	0.191823	19	0.855874
ENSG00000002549.7,LAP3,coding,chr4:17578814-17609595	ENSG00000087008.10,ACOX3,coding,chr4:8368438-8442450	0.160022	20	0.855874
ENSG00000002549.7,LAP3,coding,chr4:17578814-17609595	ENSG00000058673.10,ZC3H11A,coding,chr1:203764781-203823252	-0.121766	21	0.855874
ENSG00000002549.7,LAP3,coding,chr4:17578814-17609595	ENSG00000001631.9,KRIT1,coding,chr7:91828282-91875480	0.0904895	22	0.855874
ENSG00000002549.7,LAP3,coding,chr4:17578814-17609595	ENSG00000006432.10,MAP3K9,coding,chr14:71189242-71276251	-0.0744262	23	0.855874
ENSG00000002549.7,LAP3,coding,chr4:17578814-17609595	ENSG00000115594.7,IL1R1,coding,chr2:102681003-102796334	0.0742328	24	0.855874
ENSG00000002549.7,LAP3,coding,chr4:17578814-17609595	ENSG00000001036.8,FUCA2,coding,chr6:143816613-143832827	0.0614767	25	0.855874
ENSG00000002549.7,LAP3,coding,chr4:17578814-17609595	ENSG00000056558.6,TRAF1,coding,chr9:123664670-123691451	0.0332928	26	0.855874
ENSG00000002549.7,LAP3,coding,chr4:17578814-17609595	ENSG00000108828.9,VAT1,coding,chr17:41166621-41174459	0.0224616	27	0.855874
ENSG00000002587.5,HS3ST1,coding,chr4:11394773-11431389	ENSG00000026025.8,VIM,coding,chr10:17270257-17279592	0.533392	1	0.654244
ENSG00000002587.5,HS3ST1,coding,chr4:11394773-11431389	ENSG00000005102.8,MEOX1,coding,chr17:41717755-41739322	-0.420078	2	0.654244
ENSG00000002587.5,HS3ST1,coding,chr4:11394773-11431389	ENSG00000068366.14,ACSL4,coding,chrX:108872578-108976632	0.366316	3	0.654244
ENSG00000002587.5,HS3ST1,coding,chr4:11394773-11431389	ENSG00000004455.11,AK2,coding,chr1:33473584-33546597	-0.357922	4	0.654244
ENSG00000002587.5,HS3ST1,coding,chr4:11394773-11431389	ENSG00000000971.10,CFH,coding,chr1:196621007-196716634	0.339932	5	0.654244
ENSG00000002587.5,HS3ST1,coding,chr4:11394773-11431389	ENSG00000066136.13,NFYC,coding,chr1:41157319-41237275	-0.27732	6	0.654244
ENSG00000002587.5,HS3ST1,coding,chr4:11394773-11431389	ENSG00000017427.11,IGF1,coding,chr12:102789644-102874423	0.231841	7	0.654244
ENSG00000002587.5,HS3ST1,coding,chr4:11394773-11431389	ENSG00000052344.10,PRSS8,coding,chr16:31142755-31147083	0.230485	8	0.654244
ENSG00000002587.5,HS3ST1,coding,chr4:11394773-11431389	ENSG00000001084.6,GCLC,coding,chr6:53362138-53481768	0.222528	9	0.654244
ENSG00000002587.5,HS3ST1,coding,chr4:11394773-11431389	ENSG00000002933.3,TMEM176A,coding,chr7:150497490-150502208	-0.219444	10	0.654244
ENSG00000002587.5,HS3ST1,coding,chr4:11394773-11431389	ENSG00000004059.5,ARF5,coding,chr7:127228398-127231759	0.202856	11	0.654244
ENSG00000002587.5,HS3ST1,coding,chr4:11394773-11431389	ENSG00000007372.14,PAX6,coding,chr11:31806339-31839509	0.196281	12	0.654244
ENSG00000002587.5,HS3ST1,coding,chr4:11394773-11431389	ENSG00000064393.11,HIPK2,coding,chr7:139246315-139477577	0.18088	13	0.654244
ENSG00000002587.5,HS3ST1,coding,chr4:11394773-11431389	ENSG00000007171.11,NOS2,coding,chr17:26083791-26127555	0.169652	14	0.654244
ENSG00000002587.5,HS3ST1,coding,chr4:11394773-11431389	ENSG00000000005.5,TNMD,coding,chrX:99839798-99854882	-0.161781	15	0.654244
ENSG00000002587.5,HS3ST1,coding,chr4:11394773-11431389	ENSG00000006327.8,TNFRSF12A,coding,chr16:3070312-3072384	-0.0521163	16	0.654244
ENSG00000002587.5,HS3ST1,coding,chr4:11394773-11431389	ENSG00000062822.6,POLD1,coding,chr19:50887592-50921270	0.043762	17	0.654244
ENSG00000002726.14,ABP1,coding,chr7:150521714-150558592	ENSG00000002933.3,TMEM176A,coding,chr7:150497490-150502208	0.547146	1	0.640099
ENSG00000002726.14,ABP1,coding,chr7:150521714-150558592	ENSG00000022567.5,SLC45A4,coding,chr8:142217264-142318404	0.45943	2	0.640099
ENSG00000002726.14,ABP1,coding,chr7:150521714-150558592	ENSG00000006611.10,USH1C,coding,chr11:17515441-17565963	0.386455	3	0.640099
ENSG00000002726.14,ABP1,coding,chr7:150521714-150558592	ENSG00000005001.3,PRSS22,coding,chr16:2902727-2908171	0.374936	4	0.640099
ENSG00000002726.14,ABP1,coding,chr7:150521714-150558592	ENSG00000147862.9,NFIB,coding,chr9:14081841-14398982	-0.374261	5	0.640099
ENSG00000002726.14,ABP1,coding,chr7:150521714-150558592	ENSG00000026025.8,VIM,coding,chr10:17270257-17279592	-0.337922	6	0.640099
ENSG00000002726.14,ABP1,coding,chr7:150521714-150558592	ENSG00000004975.6,DVL2,coding,chr17:7128659-7137868	-0.30533	7	0.640099
ENSG00000002726.14,ABP1,coding,chr7:150521714-150558592	ENSG00000008441.10,NFIX,coding,chr19:13106583-13209610	-0.281175	8	0.640099
ENSG00000002726.14,ABP1,coding,chr7:150521714-150558592	ENSG00000010278.6,CD9,coding,chr12:6308880-6347427	0.266876	9	0.640099
ENSG00000002726.14,ABP1,coding,chr7:150521714-150558592	ENSG00000005961.11,ITGA2B,coding,chr17:42449549-42466873	0.218683	10	0.640099
ENSG00000002726.14,ABP1,coding,chr7:150521714-150558592	ENSG00000003096.9,KLHL13,coding,chrX:117031775-117251303	0.192279	11	0.640099
ENSG00000002726.14,ABP1,coding,chr7:150521714-150558592	ENSG00000005882.6,PDK2,coding,chr17:48172100-48189516	0.137891	12	0.640099
ENSG00000002745.7,WNT16,coding,chr7:120965420-120981158	ENSG00000078814.11,MYH7B,coding,chr20:33563205-33590240	0.502195	1	0.382414
ENSG00000002745.7,WNT16,coding,chr7:120965420-120981158	ENSG00000013297.5,CLDN11,coding,chr3:170136652-170578169	0.382459	2	0.382414
ENSG00000002745.7,WNT16,coding,chr7:120965420-120981158	ENSG00000002834.11,LASP1,coding,chr17:37026255-37078023	0.323739	3	0.382414
ENSG00000002745.7,WNT16,coding,chr7:120965420-120981158	ENSG00000005059.11,CCDC109B,coding,chr4:110481360-110609874	-0.263378	4	0.382414
ENSG00000002745.7,WNT16,coding,chr7:120965420-120981158	ENSG00000000971.10,CFH,coding,chr1:196621007-196716634	0.194605	5	0.382414
ENSG00000002745.7,WNT16,coding,chr7:120965420-120981158	ENSG00000013306.10,SLC25A39,coding,chr17:42396992-42402238	-0.194285	6	0.382414
ENSG00000002745.7,WNT16,coding,chr7:120965420-120981158	ENSG00000001561.5,ENPP4,coding,chr6:46097700-46114435	-0.185568	7	0.382414
ENSG00000002746.8,HECW1,coding,chr7:43152197-43602938	ENSG00000231638.1,AC011738.4.1,lncRNA,chr7:43548326-43562141	0.371074	1	0.356736
ENSG00000002746.8,HECW1,coding,chr7:43152197-43602938	ENSG00000050555.11,LAMC3,coding,chr9:133884468-133969860	0.354398	2	0.356736
ENSG00000002746.8,HECW1,coding,chr7:43152197-43602938	ENSG00000049323.10,LTBP1,coding,chr2:33172038-33624576	0.307234	3	0.356736
ENSG00000002746.8,HECW1,coding,chr7:43152197-43602938	ENSG00000006283.12,CACNA1G,coding,chr17:48638428-48704835	0.290214	4	0.356736
ENSG00000002746.8,HECW1,coding,chr7:43152197-43602938	ENSG00000011304.10,PTBP1,coding,chr19:797391-812327	-0.249705	5	0.356736
ENSG00000002822.9,MAD1L1,coding,chr7:1855382-2272878	ENSG00000004897.5,CDC27,coding,chr17:45195068-45266788	-0.415957	1	0.621581
ENSG00000002822.9,MAD1L1,coding,chr7:1855382-2272878	ENSG00000000419.7,DPM1,coding,chr20:49551403-49575092	-0.411694	2	0.621581
ENSG00000002822.9,MAD1L1,coding,chr7:1855382-2272878	ENSG00000035403.10,VCL,coding,chr10:75757871-75879918	-0.392767	3	0.621581
ENSG00000002822.9,MAD1L1,coding,chr7:1855382-2272878	ENSG00000258436.1,RNASE12.1,coding,chr14:21058351-21058982	0.375095	4	0.621581
ENSG00000002822.9,MAD1L1,coding,chr7:1855382-2272878	ENSG00000000457.8,SCYL3,coding,chr1:169821803-169863408	-0.322259	5	0.621581
ENSG00000002822.9,MAD1L1,coding,chr7:1855382-2272878	ENSG00000001497.12,LAS1L,coding,chrX:64732461-64754655	0.311731	6	0.621581
ENSG00000002822.9,MAD1L1,coding,chr7:1855382-2272878	ENSG00000224922.1,AL050303.7.1,lncRNA,chr21:15142252-15144061	0.235775	7	0.621581
ENSG00000002822.9,MAD1L1,coding,chr7:1855382-2272878	ENSG00000070985.8,TRPM5,coding,chr11:2425744-2444275	0.201734	8	0.621581
ENSG00000002822.9,MAD1L1,coding,chr7:1855382-2272878	ENSG00000002330.8,BAD,coding,chr11:64037301-64052176	0.165752	9	0.621581
ENSG00000002822.9,MAD1L1,coding,chr7:1855382-2272878	ENSG00000011275.13,RNF216,coding,chr7:5659677-5821370	0.107857	10	0.621581
ENSG00000002822.9,MAD1L1,coding,chr7:1855382-2272878	ENSG00000038002.4,AGA,coding,chr4:178351923-178363657	0.0692144	11	0.621581
ENSG00000002834.11,LASP1,coding,chr17:37026255-37078023	ENSG00000047644.12,WWC3,coding,chrX:9983601-10112518	0.400189	1	0.756622
ENSG00000002834.11,LASP1,coding,chr17:37026255-37078023	ENSG00000003137.4,CYP26B1,coding,chr2:72356366-72375167	0.353871	2	0.756622
ENSG00000002834.11,LASP1,coding,chr17:37026255-37078023	ENSG00000002745.7,WNT16,coding,chr7:120965420-120981158	0.323739	3	0.756622
ENSG00000002834.11,LASP1,coding,chr17:37026255-37078023	ENSG00000005020.7,SKAP2,coding,chr7:26706680-27034858	0.317524	4	0.756622
ENSG00000002834.11,LASP1,coding,chr17:37026255-37078023	ENSG00000094880.6,CDC23,coding,chr5:137523338-137549032	0.292276	5	0.756622
ENSG00000002834.11,LASP1,coding,chr17:37026255-37078023	ENSG00000006114.10,SYNRG,coding,chr17:35874899-35969488	0.288134	6	0.756622
ENSG00000002834.11,LASP1,coding,chr17:37026255-37078023	ENSG00000056661.8,PCGF2,coding,chr17:36890149-36904558	0.273653	7	0.756622
ENSG00000002834.11,LASP1,coding,chr17:37026255-37078023	ENSG00000003393.10,ALS2,coding,chr2:202565276-202645912	0.272913	8	0.756622
ENSG00000002834.11,LASP1,coding,chr17:37026255-37078023	ENSG00000001167.10,NFYA,coding,chr6:41040683-41067715	0.265829	9	0.756622
ENSG00000002834.11,LASP1,coding,chr17:37026255-37078023	ENSG00000000419.7,DPM1,coding,chr20:49551403-49575092	0.264945	10	0.756622
ENSG00000002834.11,LASP1,coding,chr17:37026255-37078023	ENSG00000003756.11,RBM5,coding,chr3:50126340-50156454	-0.252578	11	0.756622
ENSG00000002834.11,LASP1,coding,chr17:37026255-37078023	ENSG00000117036.7,ETV3,coding,chr1:157090982-157108266	0.242432	12	0.756622
ENSG00000002834.11,LASP1,coding,chr17:37026255-37078023	ENSG00000002330.8,BAD,coding,chr11:64037301-64052176	-0.24206	13	0.756622
ENSG00000002834.11,LASP1,coding,chr17:37026255-37078023	ENSG00000004897.5,CDC27,coding,chr17:45195068-45266788	0.208809	14	0.756622
ENSG00000002834.11,LASP1,coding,chr17:37026255-37078023	ENSG00000107362.9,FAM108B1,coding,chr9:74477367-74525847	0.1794	15	0.756622
ENSG00000002834.11,LASP1,coding,chr17:37026255-37078023	ENSG00000001617.7,SEMA3F,coding,chr3:50192477-50226508	0.166424	16	0.756622
ENSG00000002834.11,LASP1,coding,chr17:37026255-37078023	ENSG00000108294.3,PSMB3,coding,chr17:36909002-36920483	0.162917	17	0.756622
ENSG00000002834.11,LASP1,coding,chr17:37026255-37078023	ENSG00000035141.3,FAM136A,coding,chr2:70523106-70529222	0.154311	18	0.756622
ENSG00000002834.11,LASP1,coding,chr17:37026255-37078023	ENSG00000001561.5,ENPP4,coding,chr6:46097700-46114435	-0.146251	19	0.756622
ENSG00000002834.11,LASP1,coding,chr17:37026255-37078023	ENSG00000000003.9,TSPAN6,coding,chrX:99883666-99894988	0.135841	20	0.756622
ENSG00000002834.11,LASP1,coding,chr17:37026255-37078023	ENSG00000000457.8,SCYL3,coding,chr1:169821803-169863408	-0.104439	21	0.756622
ENSG00000002834.11,LASP1,coding,chr17:37026255-37078023	ENSG00000001497.12,LAS1L,coding,chrX:64732461-64754655	-0.0909736	22	0.756622
ENSG00000002834.11,LASP1,coding,chr17:37026255-37078023	ENSG00000004478.5,FKBP4,coding,chr12:2904118-2914576	-0.080657	23	0.756622
ENSG00000002834.11,LASP1,coding,chr17:37026255-37078023	ENSG00000001036.8,FUCA2,coding,chr6:143816613-143832827	-0.0619557	24	0.756622
ENSG00000002834.11,LASP1,coding,chr17:37026255-37078023	ENSG00000104064.11,GABPB1,coding,chr15:50569388-50647605	0.041649	25	0.756622
ENSG00000002834.11,LASP1,coding,chr17:37026255-37078023	ENSG00000005436.9,GCFC2,coding,chr2:75879125-75938115	0.0401324	26	0.756622
ENSG00000002834.11,LASP1,coding,chr17:37026255-37078023	ENSG00000005889.10,ZFX,coding,chrX:24167289-24234372	0.026104	27	0.756622
ENSG00000002834.11,LASP1,coding,chr17:37026255-37078023	ENSG00000048392.6,RRM2B,coding,chr8:103216729-103251346	0.0140036	28	0.756622
ENSG00000002834.11,LASP1,coding,chr17:37026255-37078023	ENSG00000070371.11,CLTCL1,coding,chr22:19166985-19279239	-0.0057575	29	0.756622
ENSG00000002919.9,SNX11,coding,chr17:46184910-46200105	ENSG00000082641.10,NFE2L1,coding,chr17:46125685-46138906	0.360807	1	0.595276
ENSG00000002919.9,SNX11,coding,chr17:46184910-46200105	ENSG00000058799.8,YIPF1,coding,chr1:54317391-54356407	0.333944	2	0.595276
ENSG00000002919.9,SNX11,coding,chr17:46184910-46200105	ENSG00000004897.5,CDC27,coding,chr17:45195068-45266788	0.318486	3	0.595276
ENSG00000002919.9,SNX11,coding,chr17:46184910-46200105	ENSG00000008441.10,NFIX,coding,chr19:13106583-13209610	-0.286596	4	0.595276
ENSG00000002919.9,SNX11,coding,chr17:46184910-46200105	ENSG00000012963.8,UBR7,coding,chr14:93673400-93695561	0.278284	5	0.595276
ENSG00000002919.9,SNX11,coding,chr17:46184910-46200105	ENSG00000006025.6,OSBPL7,coding,chr17:45884732-45899200	0.272729	6	0.595276
ENSG00000002919.9,SNX11,coding,chr17:46184910-46200105	ENSG00000005238.13,FAM214B,coding,chr9:35104108-35115999	0.250639	7	0.595276
ENSG00000002919.9,SNX11,coding,chr17:46184910-46200105	ENSG00000001036.8,FUCA2,coding,chr6:143816613-143832827	0.217749	8	0.595276
ENSG00000002919.9,SNX11,coding,chr17:46184910-46200105	ENSG00000001460.12,C1orf201,coding,chr1:24683488-24743424	0.186381	9	0.595276
ENSG00000002919.9,SNX11,coding,chr17:46184910-46200105	ENSG00000002587.5,HS3ST1,coding,chr4:11394773-11431389	-0.155417	10	0.595276
ENSG00000002919.9,SNX11,coding,chr17:46184910-46200105	ENSG00000006283.12,CACNA1G,coding,chr17:48638428-48704835	-0.155026	11	0.595276
ENSG00000002919.9,SNX11,coding,chr17:46184910-46200105	ENSG00000008130.10,NADK,coding,chr1:1682670-1711896	0.151746	12	0.595276
ENSG00000002919.9,SNX11,coding,chr17:46184910-46200105	ENSG00000089009.9,RPL6,coding,chr12:112842993-112856642	0.148722	13	0.595276
ENSG00000002919.9,SNX11,coding,chr17:46184910-46200105	ENSG00000005175.5,RPAP3,coding,chr12:48057069-48099844	0.126323	14	0.595276
ENSG00000002919.9,SNX11,coding,chr17:46184910-46200105	ENSG00000083123.8,BCKDHB,coding,chr6:80816363-81055987	0.028916	15	0.595276
ENSG00000002933.3,TMEM176A,coding,chr7:150497490-150502208	ENSG00000106565.12,TMEM176B,coding,chr7:150488372-150498450	0.927634	1	0.923498
ENSG00000002933.3,TMEM176A,coding,chr7:150497490-150502208	ENSG00000002726.14,ABP1,coding,chr7:150521714-150558592	0.547146	2	0.923498
ENSG00000002933.3,TMEM176A,coding,chr7:150497490-150502208	ENSG00000105499.8,PLA2G4C,coding,chr19:48551099-48614109	0.392291	3	0.923498
ENSG00000002933.3,TMEM176A,coding,chr7:150497490-150502208	ENSG00000006074.3,CCL18,coding,chr17:34391639-34399392	0.316847	4	0.923498
ENSG00000002933.3,TMEM176A,coding,chr7:150497490-150502208	ENSG00000000938.7,FGR,coding,chr1:27938574-27961788	0.290051	5	0.923498
ENSG00000002933.3,TMEM176A,coding,chr7:150497490-150502208	ENSG00000001460.12,C1orf201,coding,chr1:24683488-24743424	-0.248337	6	0.923498
ENSG00000002933.3,TMEM176A,coding,chr7:150497490-150502208	ENSG00000001630.10,CYP51A1,coding,chr7:91741464-91772266	-0.179612	7	0.923498
ENSG00000002933.3,TMEM176A,coding,chr7:150497490-150502208	ENSG00000112874.5,NUDT12,coding,chr5:102884555-102898494	0.0271561	8	0.923498
ENSG00000002933.3,TMEM176A,coding,chr7:150497490-150502208	ENSG00000115350.7,POLE4,coding,chr2:75185618-75197255	-0.0177765	9	0.923498
ENSG00000002933.3,TMEM176A,coding,chr7:150497490-150502208	ENSG00000116514.11,RNF19B,coding,chr1:33402045-33430286	0.0139545	10	0.923498
ENSG00000002933.3,TMEM176A,coding,chr7:150497490-150502208	ENSG00000109180.10,OCIAD1,coding,chr4:48807228-48863834	-0.0129926	11	0.923498
ENSG00000002933.3,TMEM176A,coding,chr7:150497490-150502208	ENSG00000159884.7,CCDC107,coding,chr9:35658300-35661508	0.0091142	12	0.923498
ENSG00000003056.3,M6PR,coding,chr12:9092958-9102551	ENSG00000004700.11,RECQL,coding,chr12:21621844-21654603	0.734612	1	0.926408
ENSG00000003056.3,M6PR,coding,chr12:9092958-9102551	ENSG00000005022.5,SLC25A5,coding,chrX:118602362-118605282	0.695026	2	0.926408
ENSG00000003056.3,M6PR,coding,chr12:9092958-9102551	ENSG00000001630.10,CYP51A1,coding,chr7:91741464-91772266	0.681067	3	0.926408
ENSG00000003056.3,M6PR,coding,chr12:9092958-9102551	ENSG00000049618.14,ARID1B,coding,chr6:157099062-157530401	0.674364	4	0.926408
ENSG00000003056.3,M6PR,coding,chr12:9092958-9102551	ENSG00000033011.5,ALG1,coding,chr16:5083702-5135395	0.658929	5	0.926408
ENSG00000003056.3,M6PR,coding,chr12:9092958-9102551	ENSG00000010165.13,METTL13,coding,chr1:171750787-171783163	0.634719	6	0.926408
ENSG00000003056.3,M6PR,coding,chr12:9092958-9102551	ENSG00000002549.7,LAP3,coding,chr4:17578814-17609595	0.53586	7	0.926408
ENSG00000003056.3,M6PR,coding,chr12:9092958-9102551	ENSG00000008324.6,SS18L2,coding,chr3:42623331-42636606	-0.522125	8	0.926408
ENSG00000003056.3,M6PR,coding,chr12:9092958-9102551	ENSG00000092330.11,TINF2,coding,chr14:24708848-24711880	0.520911	9	0.926408
ENSG00000003056.3,M6PR,coding,chr12:9092958-9102551	ENSG00000076321.6,KLHL20,coding,chr1:173684079-173755840	0.505645	10	0.926408
ENSG00000003056.3,M6PR,coding,chr12:9092958-9102551	ENSG00000007952.12,NOX1,coding,chrX:100098312-100129334	-0.497168	11	0.926408
ENSG00000003056.3,M6PR,coding,chr12:9092958-9102551	ENSG00000005339.6,CREBBP,coding,chr16:3775054-3930722	0.492121	12	0.926408
ENSG00000003056.3,M6PR,coding,chr12:9092958-9102551	ENSG00000002330.8,BAD,coding,chr11:64037301-64052176	-0.469353	13	0.926408
ENSG00000003056.3,M6PR,coding,chr12:9092958-9102551	ENSG00000030582.10,GRN,coding,chr17:42422490-42430470	0.425917	14	0.926408
ENSG00000003056.3,M6PR,coding,chr12:9092958-9102551	ENSG00000006831.9,ADIPOR2,coding,chr12:1797739-1897844	0.40752	15	0.926408
ENSG00000003056.3,M6PR,coding,chr12:9092958-9102551	ENSG00000000460.11,C1orf112,coding,chr1:169631244-169823221	0.38208	16	0.926408
ENSG00000003056.3,M6PR,coding,chr12:9092958-9102551	ENSG00000000457.8,SCYL3,coding,chr1:169821803-169863408	0.372629	17	0.926408
ENSG00000003056.3,M6PR,coding,chr12:9092958-9102551	ENSG00000089818.11,NECAP1,coding,chr12:7926147-8250367	0.354855	18	0.926408
ENSG00000003056.3,M6PR,coding,chr12:9092958-9102551	ENSG00000003509.11,C2orf56,coding,chr2:37458773-37480546	-0.309579	19	0.926408
ENSG00000003056.3,M6PR,coding,chr12:9092958-9102551	ENSG00000003756.11,RBM5,coding,chr3:50126340-50156454	-0.30011	20	0.926408
ENSG00000003056.3,M6PR,coding,chr12:9092958-9102551	ENSG00000001461.11,NIPAL3,coding,chr1:24742283-24799466	0.285881	21	0.926408
ENSG00000003056.3,M6PR,coding,chr12:9092958-9102551	ENSG00000006695.5,COX10,coding,chr17:13972845-14111994	0.262348	22	0.926408
ENSG00000003056.3,M6PR,coding,chr12:9092958-9102551	ENSG00000000419.7,DPM1,coding,chr20:49551403-49575092	0.259429	23	0.926408
ENSG00000003056.3,M6PR,coding,chr12:9092958-9102551	ENSG00000023572.4,GLRX2,coding,chr1:193065597-193075244	-0.219295	24	0.926408
ENSG00000003056.3,M6PR,coding,chr12:9092958-9102551	ENSG00000111752.5,PHC1,coding,chr12:9066491-9094063	0.145961	25	0.926408
ENSG00000003056.3,M6PR,coding,chr12:9092958-9102551	ENSG00000003987.9,MTMR7,coding,chr8:17155538-17271037	-0.114766	26	0.926408
ENSG00000003056.3,M6PR,coding,chr12:9092958-9102551	ENSG00000040275.11,CCDC99,coding,chr5:169010637-169031782	0.111318	27	0.926408
ENSG00000003056.3,M6PR,coding,chr12:9092958-9102551	ENSG00000001631.9,KRIT1,coding,chr7:91828282-91875480	0.0981567	28	0.926408
ENSG00000003056.3,M6PR,coding,chr12:9092958-9102551	ENSG00000075945.8,KIFAP3,coding,chr1:169890466-170054349	0.0743968	29	0.926408
ENSG00000003056.3,M6PR,coding,chr12:9092958-9102551	ENSG00000090470.9,PDCD7,coding,chr15:65409716-65426174	0.0577536	30	0.926408
ENSG00000003056.3,M6PR,coding,chr12:9092958-9102551	ENSG00000007237.10,GAS7,coding,chr17:9813925-10101868	0.0527541	31	0.926408
ENSG00000003056.3,M6PR,coding,chr12:9092958-9102551	ENSG00000052841.9,TTC17,coding,chr11:43380481-43516483	-0.0351883	32	0.926408
ENSG00000003056.3,M6PR,coding,chr12:9092958-9102551	ENSG00000012983.6,MAP4K5,coding,chr14:50885218-51027844	-0.00841264	33	0.926408
ENSG00000003096.9,KLHL13,coding,chrX:117031775-117251303	ENSG00000120256.4,LRP11,coding,chr6:150139933-150186199	0.430223	1	0.625014
ENSG00000003096.9,KLHL13,coding,chrX:117031775-117251303	ENSG00000004838.9,ZMYND10,coding,chr3:50378540-50384283	0.372533	2	0.625014
ENSG00000003096.9,KLHL13,coding,chrX:117031775-117251303	ENSG00000000003.9,TSPAN6,coding,chrX:99883666-99894988	0.367748	3	0.625014
ENSG00000003096.9,KLHL13,coding,chrX:117031775-117251303	ENSG00000054392.8,HHAT,coding,chr1:210501595-210849638	0.322401	4	0.625014
ENSG00000003096.9,KLHL13,coding,chrX:117031775-117251303	ENSG00000101938.10,CHRDL1,coding,chrX:109917083-110039286	0.312225	5	0.625014
ENSG00000003096.9,KLHL13,coding,chrX:117031775-117251303	ENSG00000001460.12,C1orf201,coding,chr1:24683488-24743424	0.306548	6	0.625014
ENSG00000003096.9,KLHL13,coding,chrX:117031775-117251303	ENSG00000003393.10,ALS2,coding,chr2:202565276-202645912	0.300757	7	0.625014
ENSG00000003096.9,KLHL13,coding,chrX:117031775-117251303	ENSG00000018408.10,WWTR1,coding,chr3:149235021-149454501	0.299908	8	0.625014
ENSG00000003096.9,KLHL13,coding,chrX:117031775-117251303	ENSG00000064393.11,HIPK2,coding,chr7:139246315-139477577	0.292802	9	0.625014
ENSG00000003096.9,KLHL13,coding,chrX:117031775-117251303	ENSG00000105519.5,CAPS,coding,chr19:5911385-5916219	0.286221	10	0.625014
ENSG00000003096.9,KLHL13,coding,chrX:117031775-117251303	ENSG00000001084.6,GCLC,coding,chr6:53362138-53481768	0.241834	11	0.625014
ENSG00000003096.9,KLHL13,coding,chrX:117031775-117251303	ENSG00000002746.8,HECW1,coding,chr7:43152197-43602938	0.209907	12	0.625014
ENSG00000003096.9,KLHL13,coding,chrX:117031775-117251303	ENSG00000005073.5,HOXA11,coding,chr7:27221128-27224842	0.19883	13	0.625014
ENSG00000003096.9,KLHL13,coding,chrX:117031775-117251303	ENSG00000002726.14,ABP1,coding,chr7:150521714-150558592	0.192279	14	0.625014
ENSG00000003096.9,KLHL13,coding,chrX:117031775-117251303	ENSG00000006555.6,TTC22,coding,chr1:55245384-55266940	-0.190852	15	0.625014
ENSG00000003096.9,KLHL13,coding,chrX:117031775-117251303	ENSG00000006210.6,CX3CL1,coding,chr16:57406369-57418960	-0.134795	16	0.625014
ENSG00000003096.9,KLHL13,coding,chrX:117031775-117251303	ENSG00000000938.7,FGR,coding,chr1:27938574-27961788	0.121489	17	0.625014
ENSG00000003096.9,KLHL13,coding,chrX:117031775-117251303	ENSG00000050165.12,DKK3,coding,chr11:11984652-12031316	-0.0998832	18	0.625014
ENSG00000003137.4,CYP26B1,coding,chr2:72356366-72375167	ENSG00000135636.8,DYSF,coding,chr2:71680851-71913898	0.373876	1	0.402551
ENSG00000003137.4,CYP26B1,coding,chr2:72356366-72375167	ENSG00000002834.11,LASP1,coding,chr17:37026255-37078023	0.353871	2	0.402551
ENSG00000003137.4,CYP26B1,coding,chr2:72356366-72375167	ENSG00000002745.7,WNT16,coding,chr7:120965420-120981158	0.301388	3	0.402551
ENSG00000003137.4,CYP26B1,coding,chr2:72356366-72375167	ENSG00000004399.8,PLXND1,coding,chr3:129274017-129325661	0.29516	4	0.402551
ENSG00000003137.4,CYP26B1,coding,chr2:72356366-72375167	ENSG00000003147.13,ICA1,coding,chr7:8152813-8302317	-0.291198	5	0.402551
ENSG00000003137.4,CYP26B1,coding,chr2:72356366-72375167	ENSG00000118508.4,RAB32,coding,chr6:146864828-146876101	0.281828	6	0.402551
ENSG00000003137.4,CYP26B1,coding,chr2:72356366-72375167	ENSG00000000005.5,TNMD,coding,chrX:99839798-99854882	0.229562	7	0.402551
ENSG00000003137.4,CYP26B1,coding,chr2:72356366-72375167	ENSG00000006059.3,KRT33A,coding,chr17:39502343-39507064	0.192382	8	0.402551
ENSG00000003137.4,CYP26B1,coding,chr2:72356366-72375167	ENSG00000005379.10,BZRAP1,coding,chr17:56378597-56406152	0.186801	9	0.402551
ENSG00000003147.13,ICA1,coding,chr7:8152813-8302317	ENSG00000227719.1,AC006042.6.1,lncRNA,chr7:8153654-8156191	0.705975	1	0.82622
ENSG00000003147.13,ICA1,coding,chr7:8152813-8302317	ENSG00000164976.7,KIAA1161,coding,chr9:34366667-34376851	-0.508007	2	0.82622
ENSG00000003147.13,ICA1,coding,chr7:8152813-8302317	ENSG00000004399.8,PLXND1,coding,chr3:129274017-129325661	-0.452603	3	0.82622
ENSG00000003147.13,ICA1,coding,chr7:8152813-8302317	ENSG00000086232.7,EIF2AK1,coding,chr7:6061880-6098861	0.446963	4	0.82622
ENSG00000003147.13,ICA1,coding,chr7:8152813-8302317	ENSG00000076826.4,CAMSAP3,coding,chr19:7660787-7683194	0.395977	5	0.82622
ENSG00000003147.13,ICA1,coding,chr7:8152813-8302317	ENSG00000004866.13,ST7,coding,chr7:116593291-116870157	0.390822	6	0.82622
ENSG00000003147.13,ICA1,coding,chr7:8152813-8302317	ENSG00000005022.5,SLC25A5,coding,chrX:118602362-118605282	-0.38933	7	0.82622
ENSG00000003147.13,ICA1,coding,chr7:8152813-8302317	ENSG00000001626.8,CFTR,coding,chr7:117105837-117308719	0.367591	8	0.82622
ENSG00000003147.13,ICA1,coding,chr7:8152813-8302317	ENSG00000011332.13,DPF1,coding,chr19:38701645-38720354	-0.356666	9	0.82622
ENSG00000003147.13,ICA1,coding,chr7:8152813-8302317	ENSG00000005073.5,HOXA11,coding,chr7:27221128-27224842	0.322644	10	0.82622
ENSG00000003147.13,ICA1,coding,chr7:8152813-8302317	ENSG00000001460.12,C1orf201,coding,chr1:24683488-24743424	0.31567	11	0.82622
ENSG00000003147.13,ICA1,coding,chr7:8152813-8302317	ENSG00000000005.5,TNMD,coding,chrX:99839798-99854882	-0.303046	12	0.82622
ENSG00000003147.13,ICA1,coding,chr7:8152813-8302317	ENSG00000005700.10,IBTK,coding,chr6:82879699-82957471	0.301374	13	0.82622
ENSG00000003147.13,ICA1,coding,chr7:8152813-8302317	ENSG00000003137.4,CYP26B1,coding,chr2:72356366-72375167	-0.291198	14	0.82622
ENSG00000003147.13,ICA1,coding,chr7:8152813-8302317	ENSG00000000457.8,SCYL3,coding,chr1:169821803-169863408	0.278458	15	0.82622
ENSG00000003147.13,ICA1,coding,chr7:8152813-8302317	ENSG00000006453.9,BAIAP2L1.1,coding,chr7:97920962-98030380	0.27268	16	0.82622
ENSG00000003147.13,ICA1,coding,chr7:8152813-8302317	ENSG00000001036.8,FUCA2,coding,chr6:143816613-143832827	0.269165	17	0.82622
ENSG00000003147.13,ICA1,coding,chr7:8152813-8302317	ENSG00000002919.9,SNX11,coding,chr17:46184910-46200105	0.20965	18	0.82622
ENSG00000003147.13,ICA1,coding,chr7:8152813-8302317	ENSG00000065609.8,SNAP91,coding,chr6:84262598-84419410	0.207917	19	0.82622
ENSG00000003147.13,ICA1,coding,chr7:8152813-8302317	ENSG00000002549.7,LAP3,coding,chr4:17578814-17609595	-0.198435	20	0.82622
ENSG00000003147.13,ICA1,coding,chr7:8152813-8302317	ENSG00000261793.1,RP11-350O14.18.1,lncRNA,chr9:140063305-140066436	-0.188667	21	0.82622
ENSG00000003147.13,ICA1,coding,chr7:8152813-8302317	ENSG00000004777.10,ARHGAP33,coding,chr19:36266416-36279724	-0.182777	22	0.82622
ENSG00000003147.13,ICA1,coding,chr7:8152813-8302317	ENSG00000001630.10,CYP51A1,coding,chr7:91741464-91772266	-0.181164	23	0.82622
ENSG00000003147.13,ICA1,coding,chr7:8152813-8302317	ENSG00000004455.11,AK2,coding,chr1:33473584-33546597	-0.155801	24	0.82622
ENSG00000003147.13,ICA1,coding,chr7:8152813-8302317	ENSG00000018625.9,ATP1A2,coding,chr1:160085548-160113381	-0.138276	25	0.82622
ENSG00000003147.13,ICA1,coding,chr7:8152813-8302317	ENSG00000004961.10,HCCS,coding,chrX:11129420-11141198	-0.134843	26	0.82622
ENSG00000003147.13,ICA1,coding,chr7:8152813-8302317	ENSG00000002822.9,MAD1L1,coding,chr7:1855382-2272878	0.134533	27	0.82622
ENSG00000003147.13,ICA1,coding,chr7:8152813-8302317	ENSG00000037280.10,FLT4,coding,chr5:180028505-180076624	0.126826	28	0.82622
ENSG00000003147.13,ICA1,coding,chr7:8152813-8302317	ENSG00000011638.5,TMEM159,coding,chr16:21169697-21191937	0.114602	29	0.82622
ENSG00000003147.13,ICA1,coding,chr7:8152813-8302317	ENSG00000004660.9,CAMKK1,coding,chr17:3763608-3796338	0.0680237	30	0.82622
ENSG00000003147.13,ICA1,coding,chr7:8152813-8302317	ENSG00000000460.11,C1orf112,coding,chr1:169631244-169823221	-0.0561163	31	0.82622
ENSG00000003249.8,DBNDD1,coding,chr16:90071272-90086536	ENSG00000141013.10,GAS8,coding,chr16:90086036-90111383	0.458004	1	0.564041
ENSG00000003249.8,DBNDD1,coding,chr16:90071272-90086536	ENSG00000005194.10,CIAPIN1,coding,chr16:57462080-57481440	0.403701	2	0.564041
ENSG00000003249.8,DBNDD1,coding,chr16:90071272-90086536	ENSG00000029993.10,HMGB3,coding,chrX:150148981-150159248	0.370561	3	0.564041
ENSG00000003249.8,DBNDD1,coding,chr16:90071272-90086536	ENSG00000103067.6,ESRP2,coding,chr16:68259870-68272005	0.364367	4	0.564041
ENSG00000003249.8,DBNDD1,coding,chr16:90071272-90086536	ENSG00000002330.8,BAD,coding,chr11:64037301-64052176	0.322826	5	0.564041
ENSG00000003249.8,DBNDD1,coding,chr16:90071272-90086536	ENSG00000001460.12,C1orf201,coding,chr1:24683488-24743424	0.275414	6	0.564041
ENSG00000003249.8,DBNDD1,coding,chr16:90071272-90086536	ENSG00000007047.8,MARK4,coding,chr19:45754549-45808541	0.265305	7	0.564041
ENSG00000003249.8,DBNDD1,coding,chr16:90071272-90086536	ENSG00000004487.10,KDM1A,coding,chr1:23345940-23410182	0.262127	8	0.564041
ENSG00000003249.8,DBNDD1,coding,chr16:90071272-90086536	ENSG00000003400.10,CASP10,coding,chr2:202047603-202094129	-0.243693	9	0.564041
ENSG00000003249.8,DBNDD1,coding,chr16:90071272-90086536	ENSG00000054179.6,ENTPD2,coding,chr9:139942549-139948497	0.229026	10	0.564041
ENSG00000003249.8,DBNDD1,coding,chr16:90071272-90086536	ENSG00000005073.5,HOXA11,coding,chr7:27221128-27224842	0.222163	11	0.564041
ENSG00000003249.8,DBNDD1,coding,chr16:90071272-90086536	ENSG00000004139.8,SARM1,coding,chr17:26691377-26728046	-0.177199	12	0.564041
ENSG00000003249.8,DBNDD1,coding,chr16:90071272-90086536	ENSG00000000003.9,TSPAN6,coding,chrX:99883666-99894988	0.175266	13	0.564041
ENSG00000003249.8,DBNDD1,coding,chr16:90071272-90086536	ENSG00000001461.11,NIPAL3,coding,chr1:24742283-24799466	-0.127423	14	0.564041
ENSG00000003249.8,DBNDD1,coding,chr16:90071272-90086536	ENSG00000010030.9,ETV7,coding,chr6:36322418-36356164	0.0493335	15	0.564041
ENSG00000003393.10,ALS2,coding,chr2:202565276-202645912	ENSG00000001629.5,ANKIB1,coding,chr7:91875547-92030698	0.691956	1	0.799284
ENSG00000003393.10,ALS2,coding,chr2:202565276-202645912	ENSG00000008405.6,CRY1,coding,chr12:107385141-107487607	0.635886	2	0.799284
ENSG00000003393.10,ALS2,coding,chr2:202565276-202645912	ENSG00000155755.13,TMEM237,coding,chr2:202484906-202508293	0.623517	3	0.799284
ENSG00000003393.10,ALS2,coding,chr2:202565276-202645912	ENSG00000074054.12,CLASP1,coding,chr2:122095353-122407163	0.611307	4	0.799284
ENSG00000003393.10,ALS2,coding,chr2:202565276-202645912	ENSG00000004766.11,CCDC132,coding,chr7:92861652-92988338	0.54004	5	0.799284
ENSG00000003393.10,ALS2,coding,chr2:202565276-202645912	ENSG00000006652.8,IFRD1,coding,chr7:112063022-112121072	0.518062	6	0.799284
ENSG00000003393.10,ALS2,coding,chr2:202565276-202645912	ENSG00000001167.10,NFYA,coding,chr6:41040683-41067715	0.515745	7	0.799284
ENSG00000003393.10,ALS2,coding,chr2:202565276-202645912	ENSG00000000460.11,C1orf112,coding,chr1:169631244-169823221	0.485563	8	0.799284
ENSG00000003393.10,ALS2,coding,chr2:202565276-202645912	ENSG00000006432.10,MAP3K9,coding,chr14:71189242-71276251	0.463895	9	0.799284
ENSG00000003393.10,ALS2,coding,chr2:202565276-202645912	ENSG00000000419.7,DPM1,coding,chr20:49551403-49575092	0.449173	10	0.799284
ENSG00000003393.10,ALS2,coding,chr2:202565276-202645912	ENSG00000000457.8,SCYL3,coding,chr1:169821803-169863408	0.434517	11	0.799284
ENSG00000003393.10,ALS2,coding,chr2:202565276-202645912	ENSG00000006607.8,FARP2,coding,chr2:242295657-242434256	0.419124	12	0.799284
ENSG00000003393.10,ALS2,coding,chr2:202565276-202645912	ENSG00000003509.11,C2orf56,coding,chr2:37458773-37480546	0.4109	13	0.799284
ENSG00000003393.10,ALS2,coding,chr2:202565276-202645912	ENSG00000009830.6,POMT2,coding,chr14:77741298-77787227	0.376967	14	0.799284
ENSG00000003393.10,ALS2,coding,chr2:202565276-202645912	ENSG00000003402.12,CFLAR,coding,chr2:201980826-202029033	0.362491	15	0.799284
ENSG00000003393.10,ALS2,coding,chr2:202565276-202645912	ENSG00000000003.9,TSPAN6,coding,chrX:99883666-99894988	0.298969	16	0.799284
ENSG00000003393.10,ALS2,coding,chr2:202565276-202645912	ENSG00000002834.11,LASP1,coding,chr17:37026255-37078023	0.272913	17	0.799284
ENSG00000003393.10,ALS2,coding,chr2:202565276-202645912	ENSG00000004975.6,DVL2,coding,chr17:7128659-7137868	0.268452	18	0.799284
ENSG00000003393.10,ALS2,coding,chr2:202565276-202645912	ENSG00000001460.12,C1orf201,coding,chr1:24683488-24743424	0.13827	19	0.799284
ENSG00000003393.10,ALS2,coding,chr2:202565276-202645912	ENSG00000049239.7,H6PD,coding,chr1:9294862-9331396	0.104582	20	0.799284
ENSG00000003393.10,ALS2,coding,chr2:202565276-202645912	ENSG00000004660.9,CAMKK1,coding,chr17:3763608-3796338	0.00620896	21	0.799284
ENSG00000003400.10,CASP10,coding,chr2:202047603-202094129	ENSG00000010671.10,BTK,coding,chrX:100604434-100641183	0.449666	1	0.660959
ENSG00000003400.10,CASP10,coding,chr2:202047603-202094129	ENSG00000102057.5,KCND1,coding,chrX:48818638-48827976	0.434942	2	0.660959
ENSG00000003400.10,CASP10,coding,chr2:202047603-202094129	ENSG00000077782.14,FGFR1,coding,chr8:38268655-38326352	-0.380667	3	0.660959
ENSG00000003400.10,CASP10,coding,chr2:202047603-202094129	ENSG00000000938.7,FGR,coding,chr1:27938574-27961788	0.37921	4	0.660959
ENSG00000003400.10,CASP10,coding,chr2:202047603-202094129	ENSG00000004487.10,KDM1A,coding,chr1:23345940-23410182	-0.367159	5	0.660959
ENSG00000003400.10,CASP10,coding,chr2:202047603-202094129	ENSG00000073803.9,MAP3K13,coding,chr3:185000728-185206885	0.348541	6	0.660959
ENSG00000003400.10,CASP10,coding,chr2:202047603-202094129	ENSG00000006118.10,TMEM132A,coding,chr11:60691934-60704631	-0.345446	7	0.660959
ENSG00000003400.10,CASP10,coding,chr2:202047603-202094129	ENSG00000008382.10,MPND,coding,chr19:4343523-4360082	-0.31048	8	0.660959
ENSG00000003400.10,CASP10,coding,chr2:202047603-202094129	ENSG00000002726.14,ABP1,coding,chr7:150521714-150558592	0.292362	9	0.660959
ENSG00000003400.10,CASP10,coding,chr2:202047603-202094129	ENSG00000007038.5,PRSS21,coding,chr16:2867163-2871720	0.292063	10	0.660959
ENSG00000003400.10,CASP10,coding,chr2:202047603-202094129	ENSG00000135519.5,KCNH3,coding,chr12:49932939-49952077	-0.269038	11	0.660959
ENSG00000003400.10,CASP10,coding,chr2:202047603-202094129	ENSG00000001626.8,CFTR,coding,chr7:117105837-117308719	0.203796	12	0.660959
ENSG00000003400.10,CASP10,coding,chr2:202047603-202094129	ENSG00000003509.11,C2orf56,coding,chr2:37458773-37480546	0.186464	13	0.660959
ENSG00000003400.10,CASP10,coding,chr2:202047603-202094129	ENSG00000001460.12,C1orf201,coding,chr1:24683488-24743424	-0.162097	14	0.660959
ENSG00000003400.10,CASP10,coding,chr2:202047603-202094129	ENSG00000000003.9,TSPAN6,coding,chrX:99883666-99894988	-0.13796	15	0.660959
ENSG00000003400.10,CASP10,coding,chr2:202047603-202094129	ENSG00000001461.11,NIPAL3,coding,chr1:24742283-24799466	0.137325	16	0.660959
ENSG00000003400.10,CASP10,coding,chr2:202047603-202094129	ENSG00000072518.14,MARK2,coding,chr11:63606399-63678491	0.134422	17	0.660959
ENSG00000003400.10,CASP10,coding,chr2:202047603-202094129	ENSG00000000005.5,TNMD,coding,chrX:99839798-99854882	0.110583	18	0.660959
ENSG00000003400.10,CASP10,coding,chr2:202047603-202094129	ENSG00000013561.13,RNF14,coding,chr5:141337892-141369856	-0.107688	19	0.660959
ENSG00000003402.12,CFLAR,coding,chr2:201980826-202029033	ENSG00000034677.7,RNF19A,coding,chr8:101269287-101348446	0.539718	1	0.848679
ENSG00000003402.12,CFLAR,coding,chr2:201980826-202029033	ENSG00000004700.11,RECQL,coding,chr12:21621844-21654603	0.510233	2	0.848679
ENSG00000003402.12,CFLAR,coding,chr2:201980826-202029033	ENSG00000006715.11,VPS41,coding,chr7:38762562-38971994	0.418676	3	0.848679
ENSG00000003402.12,CFLAR,coding,chr2:201980826-202029033	ENSG00000004468.6,CD38,coding,chr4:15779897-15851069	0.4029	4	0.848679
ENSG00000003402.12,CFLAR,coding,chr2:201980826-202029033	ENSG00000088256.3,GNA11,coding,chr19:3094407-3121452	0.384834	5	0.848679
ENSG00000003402.12,CFLAR,coding,chr2:201980826-202029033	ENSG00000000938.7,FGR,coding,chr1:27938574-27961788	0.378353	6	0.848679
ENSG00000003402.12,CFLAR,coding,chr2:201980826-202029033	ENSG00000033867.12,SLC4A7,coding,chr3:27414213-27525911	0.374574	7	0.848679
ENSG00000003402.12,CFLAR,coding,chr2:201980826-202029033	ENSG00000003393.10,ALS2,coding,chr2:202565276-202645912	0.362491	8	0.848679
ENSG00000003402.12,CFLAR,coding,chr2:201980826-202029033	ENSG00000067066.11,SP100,coding,chr2:231280656-231408805	0.357746	9	0.848679
ENSG00000003402.12,CFLAR,coding,chr2:201980826-202029033	ENSG00000006042.5,TMEM98,coding,chr17:31254927-31268667	-0.3545	10	0.848679
ENSG00000003402.12,CFLAR,coding,chr2:201980826-202029033	ENSG00000001630.10,CYP51A1,coding,chr7:91741464-91772266	0.34781	11	0.848679
ENSG00000003402.12,CFLAR,coding,chr2:201980826-202029033	ENSG00000000457.8,SCYL3,coding,chr1:169821803-169863408	0.327253	12	0.848679
ENSG00000003402.12,CFLAR,coding,chr2:201980826-202029033	ENSG00000003400.10,CASP10,coding,chr2:202047603-202094129	0.325632	13	0.848679
ENSG00000003402.12,CFLAR,coding,chr2:201980826-202029033	ENSG00000001461.11,NIPAL3,coding,chr1:24742283-24799466	0.29396	14	0.848679
ENSG00000003402.12,CFLAR,coding,chr2:201980826-202029033	ENSG00000092020.6,PPP2R3C,coding,chr14:35554672-35591723	0.293244	15	0.848679
ENSG00000003402.12,CFLAR,coding,chr2:201980826-202029033	ENSG00000006576.11,PHTF2,coding,chr7:77428108-77586818	0.264945	16	0.848679
ENSG00000003402.12,CFLAR,coding,chr2:201980826-202029033	ENSG00000000419.7,DPM1,coding,chr20:49551403-49575092	0.259734	17	0.848679
ENSG00000003402.12,CFLAR,coding,chr2:201980826-202029033	ENSG00000001167.10,NFYA,coding,chr6:41040683-41067715	0.231384	18	0.848679
ENSG00000003402.12,CFLAR,coding,chr2:201980826-202029033	ENSG00000260910.1,RP11-199F6.9.1,lncRNA,chr13:114629486-114631817	-0.22077	19	0.848679
ENSG00000003402.12,CFLAR,coding,chr2:201980826-202029033	ENSG00000234431.2,AC007283.5.1,lncRNA,chr2:202031687-202032269	0.183632	20	0.848679
ENSG00000003402.12,CFLAR,coding,chr2:201980826-202029033	ENSG00000005187.7,ACSM3,coding,chr16:20621564-20808903	0.174289	21	0.848679
ENSG00000003402.12,CFLAR,coding,chr2:201980826-202029033	ENSG00000000003.9,TSPAN6,coding,chrX:99883666-99894988	-0.149955	22	0.848679
ENSG00000003402.12,CFLAR,coding,chr2:201980826-202029033	ENSG00000004848.6,ARX,coding,chrX:25021810-25034065	0.131292	23	0.848679
ENSG00000003402.12,CFLAR,coding,chr2:201980826-202029033	ENSG00000006468.9,ETV1,coding,chr7:13930852-14031050	-0.120121	24	0.848679
ENSG00000003402.12,CFLAR,coding,chr2:201980826-202029033	ENSG00000109911.13,ELP4,coding,chr11:31531296-31805546	0.059257	25	0.848679
ENSG00000003402.12,CFLAR,coding,chr2:201980826-202029033	ENSG00000005001.3,PRSS22,coding,chr16:2902727-2908171	0.0414134	26	0.848679
ENSG00000003402.12,CFLAR,coding,chr2:201980826-202029033	ENSG00000005801.11,ZNF195,coding,chr11:3360490-3400448	-0.0414002	27	0.848679
ENSG00000003402.12,CFLAR,coding,chr2:201980826-202029033	ENSG00000005471.11,ABCB4,coding,chr7:87031012-87109751	-0.0272884	28	0.848679
ENSG00000003402.12,CFLAR,coding,chr2:201980826-202029033	ENSG00000006837.6,CDKL3,coding,chr5:133541304-133706738	-0.0180264	29	0.848679
ENSG00000003436.10,TFPI,coding,chr2:188328956-188430487	ENSG00000012504.9,NR1H4,coding,chr12:100867485-100958191	0.481649	1	0.655282
ENSG00000003436.10,TFPI,coding,chr2:188328956-188430487	ENSG00000067082.9,KLF6,coding,chr10:3818187-3827473	0.415154	2	0.655282
ENSG00000003436.10,TFPI,coding,chr2:188328956-188430487	ENSG00000006747.10,SCIN,coding,chr7:12610202-12693228	0.403113	3	0.655282
ENSG00000003436.10,TFPI,coding,chr2:188328956-188430487	ENSG00000006638.6,TBXA2R,coding,chr19:3594503-3606831	0.377074	4	0.655282
ENSG00000003436.10,TFPI,coding,chr2:188328956-188430487	ENSG00000005513.8,SOX8,coding,chr16:1031807-1036979	0.334333	5	0.655282
ENSG00000003436.10,TFPI,coding,chr2:188328956-188430487	ENSG00000005073.5,HOXA11,coding,chr7:27221128-27224842	0.326246	6	0.655282
ENSG00000003436.10,TFPI,coding,chr2:188328956-188430487	ENSG00000005020.7,SKAP2,coding,chr7:26706680-27034858	0.322633	7	0.655282
ENSG00000003436.10,TFPI,coding,chr2:188328956-188430487	ENSG00000003989.12,SLC7A2,coding,chr8:17354596-17428082	0.321872	8	0.655282
ENSG00000003436.10,TFPI,coding,chr2:188328956-188430487	ENSG00000171246.4,NPTX1,coding,chr17:78440632-78450404	0.313101	9	0.655282
ENSG00000003436.10,TFPI,coding,chr2:188328956-188430487	ENSG00000001036.8,FUCA2,coding,chr6:143816613-143832827	0.273784	10	0.655282
ENSG00000003436.10,TFPI,coding,chr2:188328956-188430487	ENSG00000001497.12,LAS1L,coding,chrX:64732461-64754655	-0.244476	11	0.655282
ENSG00000003436.10,TFPI,coding,chr2:188328956-188430487	ENSG00000005187.7,ACSM3,coding,chr16:20621564-20808903	0.227594	12	0.655282
ENSG00000003436.10,TFPI,coding,chr2:188328956-188430487	ENSG00000001630.10,CYP51A1,coding,chr7:91741464-91772266	-0.222633	13	0.655282
ENSG00000003436.10,TFPI,coding,chr2:188328956-188430487	ENSG00000034152.13,MAP2K3,coding,chr17:21187983-21218552	0.217796	14	0.655282
ENSG00000003436.10,TFPI,coding,chr2:188328956-188430487	ENSG00000003056.3,M6PR,coding,chr12:9092958-9102551	-0.20925	15	0.655282
ENSG00000003436.10,TFPI,coding,chr2:188328956-188430487	ENSG00000000938.7,FGR,coding,chr1:27938574-27961788	0.208592	16	0.655282
ENSG00000003436.10,TFPI,coding,chr2:188328956-188430487	ENSG00000000419.7,DPM1,coding,chr20:49551403-49575092	0.180518	17	0.655282
ENSG00000003436.10,TFPI,coding,chr2:188328956-188430487	ENSG00000000971.10,CFH,coding,chr1:196621007-196716634	0.174925	18	0.655282
ENSG00000003436.10,TFPI,coding,chr2:188328956-188430487	ENSG00000000005.5,TNMD,coding,chrX:99839798-99854882	-0.168562	19	0.655282
ENSG00000003436.10,TFPI,coding,chr2:188328956-188430487	ENSG00000002834.11,LASP1,coding,chr17:37026255-37078023	0.149199	20	0.655282
ENSG00000003436.10,TFPI,coding,chr2:188328956-188430487	ENSG00000004399.8,PLXND1,coding,chr3:129274017-129325661	0.12858	21	0.655282
ENSG00000003436.10,TFPI,coding,chr2:188328956-188430487	ENSG00000000460.11,C1orf112,coding,chr1:169631244-169823221	-0.112443	22	0.655282
ENSG00000003436.10,TFPI,coding,chr2:188328956-188430487	ENSG00000002549.7,LAP3,coding,chr4:17578814-17609595	-0.0944652	23	0.655282
ENSG00000003436.10,TFPI,coding,chr2:188328956-188430487	ENSG00000004700.11,RECQL,coding,chr12:21621844-21654603	0.0389896	24	0.655282
ENSG00000003509.11,C2orf56,coding,chr2:37458773-37480546	ENSG00000005436.9,GCFC2,coding,chr2:75879125-75938115	0.71089	1	0.859826
ENSG00000003509.11,C2orf56,coding,chr2:37458773-37480546	ENSG00000011566.8,MAP4K3,coding,chr2:39476406-39664453	0.68257	2	0.859826
ENSG00000003509.11,C2orf56,coding,chr2:37458773-37480546	ENSG00000004534.9,RBM6,coding,chr3:49977439-50137478	0.621034	3	0.859826
ENSG00000003509.11,C2orf56,coding,chr2:37458773-37480546	ENSG00000119729.6,RHOQ,coding,chr2:46768944-46810260	0.60726	4	0.859826
ENSG00000003509.11,C2orf56,coding,chr2:37458773-37480546	ENSG00000001631.9,KRIT1,coding,chr7:91828282-91875480	0.563983	5	0.859826
ENSG00000003509.11,C2orf56,coding,chr2:37458773-37480546	ENSG00000018699.7,TTC27,coding,chr2:32853098-33046118	0.521121	6	0.859826
ENSG00000003509.11,C2orf56,coding,chr2:37458773-37480546	ENSG00000002016.11,RAD52,coding,chr12:1021242-1100356	0.503697	7	0.859826
ENSG00000003509.11,C2orf56,coding,chr2:37458773-37480546	ENSG00000000419.7,DPM1,coding,chr20:49551403-49575092	0.468341	8	0.859826
ENSG00000003509.11,C2orf56,coding,chr2:37458773-37480546	ENSG00000001629.5,ANKIB1,coding,chr7:91875547-92030698	0.459063	9	0.859826
ENSG00000003509.11,C2orf56,coding,chr2:37458773-37480546	ENSG00000003393.10,ALS2,coding,chr2:202565276-202645912	0.4109	10	0.859826
ENSG00000003509.11,C2orf56,coding,chr2:37458773-37480546	ENSG00000048162.14,NOP16,coding,chr5:175810948-175815976	0.410465	11	0.859826
ENSG00000003509.11,C2orf56,coding,chr2:37458773-37480546	ENSG00000001630.10,CYP51A1,coding,chr7:91741464-91772266	-0.405202	12	0.859826
ENSG00000003509.11,C2orf56,coding,chr2:37458773-37480546	ENSG00000037757.8,MRI1,coding,chr19:13875336-13885096	0.388538	13	0.859826
ENSG00000003509.11,C2orf56,coding,chr2:37458773-37480546	ENSG00000001036.8,FUCA2,coding,chr6:143816613-143832827	0.355237	14	0.859826
ENSG00000003509.11,C2orf56,coding,chr2:37458773-37480546	ENSG00000008869.6,HEATR5B,coding,chr2:37195525-37311485	0.34126	15	0.859826
ENSG00000003509.11,C2orf56,coding,chr2:37458773-37480546	ENSG00000003056.3,M6PR,coding,chr12:9092958-9102551	-0.309579	16	0.859826
ENSG00000003509.11,C2orf56,coding,chr2:37458773-37480546	ENSG00000073009.8,IKBKG,coding,chrX:153769413-153796782	-0.280188	17	0.859826
ENSG00000003509.11,C2orf56,coding,chr2:37458773-37480546	ENSG00000000003.9,TSPAN6,coding,chrX:99883666-99894988	0.270587	18	0.859826
ENSG00000003509.11,C2orf56,coding,chr2:37458773-37480546	ENSG00000004838.9,ZMYND10,coding,chr3:50378540-50384283	-0.239428	19	0.859826
ENSG00000003509.11,C2orf56,coding,chr2:37458773-37480546	ENSG00000002587.5,HS3ST1,coding,chr4:11394773-11431389	-0.208675	20	0.859826
ENSG00000003509.11,C2orf56,coding,chr2:37458773-37480546	ENSG00000054118.9,THRAP3,coding,chr1:36690016-36770958	0.15014	21	0.859826
ENSG00000003509.11,C2orf56,coding,chr2:37458773-37480546	ENSG00000032389.8,TSSC1,coding,chr2:3192695-3381653	-0.0974279	22	0.859826
ENSG00000003509.11,C2orf56,coding,chr2:37458773-37480546	ENSG00000006015.12,C19orf60,coding,chr19:18699494-18703146	-0.0681114	23	0.859826
ENSG00000003509.11,C2orf56,coding,chr2:37458773-37480546	ENSG00000006459.6,JHDM1D,coding,chr7:139784545-139876835	-0.0316445	24	0.859826
ENSG00000003509.11,C2orf56,coding,chr2:37458773-37480546	ENSG00000006377.9,DLX6,coding,chr7:96634859-96640351	-0.0278518	25	0.859826
ENSG00000003509.11,C2orf56,coding,chr2:37458773-37480546	ENSG00000089486.10,C16orf5,coding,chr16:4560719-4588829	0.00708343	26	0.859826
ENSG00000003756.11,RBM5,coding,chr3:50126340-50156454	ENSG00000235016.1,RP11-493K19.3.1,lncRNA,chr3:50153454-50193518	0.764723	1	0.912701
ENSG00000003756.11,RBM5,coding,chr3:50126340-50156454	ENSG00000114857.13,NKTR,coding,chr3:42642105-42690227	0.750898	2	0.912701
ENSG00000003756.11,RBM5,coding,chr3:50126340-50156454	ENSG00000004534.9,RBM6,coding,chr3:49977439-50137478	0.725197	3	0.912701
ENSG00000003756.11,RBM5,coding,chr3:50126340-50156454	ENSG00000059588.5,TARBP1,coding,chr1:234527058-234614849	0.696239	4	0.912701
ENSG00000003756.11,RBM5,coding,chr3:50126340-50156454	ENSG00000002016.11,RAD52,coding,chr12:1021242-1100356	0.593653	5	0.912701
ENSG00000003756.11,RBM5,coding,chr3:50126340-50156454	ENSG00000010322.10,NISCH,coding,chr3:52489133-52527087	0.588271	6	0.912701
ENSG00000003756.11,RBM5,coding,chr3:50126340-50156454	ENSG00000109756.4,RAPGEF2,coding,chr4:160025329-160281321	0.46408	7	0.912701
ENSG00000003756.11,RBM5,coding,chr3:50126340-50156454	ENSG00000000457.8,SCYL3,coding,chr1:169821803-169863408	0.301709	8	0.912701
ENSG00000003756.11,RBM5,coding,chr3:50126340-50156454	ENSG00000003056.3,M6PR,coding,chr12:9092958-9102551	-0.30011	9	0.912701
ENSG00000003756.11,RBM5,coding,chr3:50126340-50156454	ENSG00000001460.12,C1orf201,coding,chr1:24683488-24743424	0.298006	10	0.912701
ENSG00000003756.11,RBM5,coding,chr3:50126340-50156454	ENSG00000085662.8,AKR1B1,coding,chr7:134127126-134144036	-0.292378	11	0.912701
ENSG00000003756.11,RBM5,coding,chr3:50126340-50156454	ENSG00000001631.9,KRIT1,coding,chr7:91828282-91875480	0.289463	12	0.912701
ENSG00000003756.11,RBM5,coding,chr3:50126340-50156454	ENSG00000002834.11,LASP1,coding,chr17:37026255-37078023	-0.252578	13	0.912701
ENSG00000003756.11,RBM5,coding,chr3:50126340-50156454	ENSG00000006744.10,ELAC2,coding,chr17:12894929-12921381	0.225737	14	0.912701
ENSG00000003756.11,RBM5,coding,chr3:50126340-50156454	ENSG00000001629.5,ANKIB1,coding,chr7:91875547-92030698	0.219729	15	0.912701
ENSG00000003756.11,RBM5,coding,chr3:50126340-50156454	ENSG00000071243.11,ING3,coding,chr7:120590802-120617270	0.210812	16	0.912701
ENSG00000003756.11,RBM5,coding,chr3:50126340-50156454	ENSG00000000419.7,DPM1,coding,chr20:49551403-49575092	-0.203834	17	0.912701
ENSG00000003756.11,RBM5,coding,chr3:50126340-50156454	ENSG00000007255.5,TRAPPC6A,coding,chr19:45666186-45681485	0.194941	18	0.912701
ENSG00000003756.11,RBM5,coding,chr3:50126340-50156454	ENSG00000001630.10,CYP51A1,coding,chr7:91741464-91772266	-0.167995	19	0.912701
ENSG00000003756.11,RBM5,coding,chr3:50126340-50156454	ENSG00000005075.11,POLR2J,coding,chr7:102113564-102119354	0.153875	20	0.912701
ENSG00000003756.11,RBM5,coding,chr3:50126340-50156454	ENSG00000062822.6,POLD1,coding,chr19:50887592-50921270	-0.125062	21	0.912701
ENSG00000003756.11,RBM5,coding,chr3:50126340-50156454	ENSG00000010256.6,UQCRC1,coding,chr3:48636434-48648409	-0.0959165	22	0.912701
ENSG00000003756.11,RBM5,coding,chr3:50126340-50156454	ENSG00000005175.5,RPAP3,coding,chr12:48057069-48099844	-0.0947079	23	0.912701
ENSG00000003756.11,RBM5,coding,chr3:50126340-50156454	ENSG00000003989.12,SLC7A2,coding,chr8:17354596-17428082	-0.0873814	24	0.912701
ENSG00000003756.11,RBM5,coding,chr3:50126340-50156454	ENSG00000005812.6,FBXL3,coding,chr13:77566739-77601330	-0.0165171	25	0.912701
ENSG00000003987.9,MTMR7,coding,chr8:17155538-17271037	ENSG00000006652.8,IFRD1,coding,chr7:112063022-112121072	0.496078	1	0.558159
ENSG00000003987.9,MTMR7,coding,chr8:17155538-17271037	ENSG00000000419.7,DPM1,coding,chr20:49551403-49575092	0.493057	2	0.558159
ENSG00000003987.9,MTMR7,coding,chr8:17155538-17271037	ENSG00000001631.9,KRIT1,coding,chr7:91828282-91875480	0.451651	3	0.558159
ENSG00000003987.9,MTMR7,coding,chr8:17155538-17271037	ENSG00000174529.6,TMEM81,coding,chr1:205052257-205053645	0.426678	4	0.558159
ENSG00000003987.9,MTMR7,coding,chr8:17155538-17271037	ENSG00000211827.1,TRDJ2,coding,chr14:22925680-22925734	-0.353354	5	0.558159
ENSG00000003987.9,MTMR7,coding,chr8:17155538-17271037	ENSG00000003989.12,SLC7A2,coding,chr8:17354596-17428082	0.2686	6	0.558159
ENSG00000003987.9,MTMR7,coding,chr8:17155538-17271037	ENSG00000001630.10,CYP51A1,coding,chr7:91741464-91772266	-0.165893	7	0.558159
ENSG00000003987.9,MTMR7,coding,chr8:17155538-17271037	ENSG00000002549.7,LAP3,coding,chr4:17578814-17609595	-0.0714782	8	0.558159
ENSG00000003989.12,SLC7A2,coding,chr8:17354596-17428082	ENSG00000104213.7,PDGFRL,coding,chr8:17433941-17501580	0.571859	1	0.622576
ENSG00000003989.12,SLC7A2,coding,chr8:17354596-17428082	ENSG00000075891.15,PAX2,coding,chr10:102495359-102589698	0.361473	2	0.622576
ENSG00000003989.12,SLC7A2,coding,chr8:17354596-17428082	ENSG00000003436.10,TFPI,coding,chr2:188328956-188430487	0.321872	3	0.622576
ENSG00000003989.12,SLC7A2,coding,chr8:17354596-17428082	ENSG00000006118.10,TMEM132A,coding,chr11:60691934-60704631	-0.303807	4	0.622576
ENSG00000003989.12,SLC7A2,coding,chr8:17354596-17428082	ENSG00000003987.9,MTMR7,coding,chr8:17155538-17271037	0.2686	5	0.622576
ENSG00000003989.12,SLC7A2,coding,chr8:17354596-17428082	ENSG00000007933.8,FMO3,coding,chr1:171060017-171086959	-0.235527	6	0.622576
ENSG00000003989.12,SLC7A2,coding,chr8:17354596-17428082	ENSG00000069399.7,BCL3,coding,chr19:45250961-45263301	0.181897	7	0.622576
ENSG00000003989.12,SLC7A2,coding,chr8:17354596-17428082	ENSG00000000003.9,TSPAN6,coding,chrX:99883666-99894988	-0.172981	8	0.622576
ENSG00000003989.12,SLC7A2,coding,chr8:17354596-17428082	ENSG00000005059.11,CCDC109B,coding,chr4:110481360-110609874	-0.104366	9	0.622576
ENSG00000003989.12,SLC7A2,coding,chr8:17354596-17428082	ENSG00000089123.10,TASP1,coding,chr20:13246708-13619587	0.102929	10	0.622576
ENSG00000003989.12,SLC7A2,coding,chr8:17354596-17428082	ENSG00000000419.7,DPM1,coding,chr20:49551403-49575092	0.101597	11	0.622576
ENSG00000003989.12,SLC7A2,coding,chr8:17354596-17428082	ENSG00000131142.9,CCL25,coding,chr19:8117650-8127534	0.0978142	12	0.622576
ENSG00000003989.12,SLC7A2,coding,chr8:17354596-17428082	ENSG00000004534.9,RBM6,coding,chr3:49977439-50137478	-0.0806924	13	0.622576
ENSG00000004059.5,ARF5,coding,chr7:127228398-127231759	ENSG00000005075.11,POLR2J,coding,chr7:102113564-102119354	0.592002	1	0.82772
ENSG00000004059.5,ARF5,coding,chr7:127228398-127231759	ENSG00000120137.6,PANK3,coding,chr5:167975499-168006605	-0.518415	2	0.82772
ENSG00000004059.5,ARF5,coding,chr7:127228398-127231759	ENSG00000072506.8,HSD17B10,coding,chrX:53458205-53461320	0.504576	3	0.82772
ENSG00000004059.5,ARF5,coding,chr7:127228398-127231759	ENSG00000012174.7,MBTPS2,coding,chrX:21857753-21903542	-0.494821	4	0.82772
ENSG00000004059.5,ARF5,coding,chr7:127228398-127231759	ENSG00000008952.10,SEC62,coding,chr3:169684422-169716161	-0.467873	5	0.82772
ENSG00000004059.5,ARF5,coding,chr7:127228398-127231759	ENSG00000005486.10,RHBDD2,coding,chr7:75471919-75518244	0.465205	6	0.82772
ENSG00000004059.5,ARF5,coding,chr7:127228398-127231759	ENSG00000006114.10,SYNRG,coding,chr17:35874899-35969488	-0.464746	7	0.82772
ENSG00000004059.5,ARF5,coding,chr7:127228398-127231759	ENSG00000004897.5,CDC27,coding,chr17:45195068-45266788	-0.413609	8	0.82772
ENSG00000004059.5,ARF5,coding,chr7:127228398-127231759	ENSG00000007255.5,TRAPPC6A,coding,chr19:45666186-45681485	0.407961	9	0.82772
ENSG00000004059.5,ARF5,coding,chr7:127228398-127231759	ENSG00000000419.7,DPM1,coding,chr20:49551403-49575092	-0.394708	10	0.82772
ENSG00000004059.5,ARF5,coding,chr7:127228398-127231759	ENSG00000099785.5,MARCH2,coding,chr19:8478186-8503895	0.339174	11	0.82772
ENSG00000004059.5,ARF5,coding,chr7:127228398-127231759	ENSG00000001461.11,NIPAL3,coding,chr1:24742283-24799466	-0.332737	12	0.82772
ENSG00000004059.5,ARF5,coding,chr7:127228398-127231759	ENSG00000001497.12,LAS1L,coding,chrX:64732461-64754655	0.301985	13	0.82772
ENSG00000004059.5,ARF5,coding,chr7:127228398-127231759	ENSG00000000457.8,SCYL3,coding,chr1:169821803-169863408	-0.24484	14	0.82772
ENSG00000004059.5,ARF5,coding,chr7:127228398-127231759	ENSG00000002330.8,BAD,coding,chr11:64037301-64052176	0.238546	15	0.82772
ENSG00000004059.5,ARF5,coding,chr7:127228398-127231759	ENSG00000005073.5,HOXA11,coding,chr7:27221128-27224842	0.215893	16	0.82772
ENSG00000004059.5,ARF5,coding,chr7:127228398-127231759	ENSG00000002587.5,HS3ST1,coding,chr4:11394773-11431389	0.202856	17	0.82772
ENSG00000004059.5,ARF5,coding,chr7:127228398-127231759	ENSG00000004866.13,ST7,coding,chr7:116593291-116870157	0.166894	18	0.82772
ENSG00000004059.5,ARF5,coding,chr7:127228398-127231759	ENSG00000008282.3,SYPL1,coding,chr7:105730948-105753022	-0.148459	19	0.82772
ENSG00000004059.5,ARF5,coding,chr7:127228398-127231759	ENSG00000000460.11,C1orf112,coding,chr1:169631244-169823221	-0.137098	20	0.82772
ENSG00000004059.5,ARF5,coding,chr7:127228398-127231759	ENSG00000009335.13,UBE3C,coding,chr7:156931606-157062066	-0.136044	21	0.82772
ENSG00000004059.5,ARF5,coding,chr7:127228398-127231759	ENSG00000006757.7,PNPLA4,coding,chrX:7866287-7895780	0.119889	22	0.82772
ENSG00000004059.5,ARF5,coding,chr7:127228398-127231759	ENSG00000000938.7,FGR,coding,chr1:27938574-27961788	-0.108298	23	0.82772
ENSG00000004059.5,ARF5,coding,chr7:127228398-127231759	ENSG00000004975.6,DVL2,coding,chr17:7128659-7137868	0.0730668	24	0.82772
ENSG00000004059.5,ARF5,coding,chr7:127228398-127231759	ENSG00000065000.9,AP3D1,coding,chr19:2100992-2151556	0.052753	25	0.82772
ENSG00000004059.5,ARF5,coding,chr7:127228398-127231759	ENSG00000106144.14,CASP2,coding,chr7:142985307-143004789	0.0457993	26	0.82772
ENSG00000004139.8,SARM1,coding,chr17:26691377-26728046	ENSG00000076351.7,SLC46A1,coding,chr17:26721660-26733228	0.491123	1	0.619326
ENSG00000004139.8,SARM1,coding,chr17:26691377-26728046	ENSG00000087258.9,GNAO1,coding,chr16:56225301-56391356	0.426897	2	0.619326
ENSG00000004139.8,SARM1,coding,chr17:26691377-26728046	ENSG00000006025.6,OSBPL7,coding,chr17:45884732-45899200	0.396784	3	0.619326
ENSG00000004139.8,SARM1,coding,chr17:26691377-26728046	ENSG00000004660.9,CAMKK1,coding,chr17:3763608-3796338	0.353504	4	0.619326
ENSG00000004139.8,SARM1,coding,chr17:26691377-26728046	ENSG00000005469.7,CROT,coding,chr7:86974996-87029111	0.313781	5	0.619326
ENSG00000004139.8,SARM1,coding,chr17:26691377-26728046	ENSG00000005339.6,CREBBP,coding,chr16:3775054-3930722	0.271637	6	0.619326
ENSG00000004139.8,SARM1,coding,chr17:26691377-26728046	ENSG00000003756.11,RBM5,coding,chr3:50126340-50156454	0.262991	7	0.619326
ENSG00000004139.8,SARM1,coding,chr17:26691377-26728046	ENSG00000004779.4,NDUFAB1,coding,chr16:23592322-23607677	-0.254116	8	0.619326
ENSG00000004139.8,SARM1,coding,chr17:26691377-26728046	ENSG00000007202.7,KIAA0100,coding,chr17:26941458-26972472	0.227206	9	0.619326
ENSG00000004139.8,SARM1,coding,chr17:26691377-26728046	ENSG00000006625.11,GGCT,coding,chr7:30536236-30544460	-0.213967	10	0.619326
ENSG00000004139.8,SARM1,coding,chr17:26691377-26728046	ENSG00000116761.7,CTH,coding,chr1:70876900-70905534	-0.205111	11	0.619326
ENSG00000004139.8,SARM1,coding,chr17:26691377-26728046	ENSG00000008735.10,MAPK8IP2,coding,chr22:51039113-51052409	0.203732	12	0.619326
ENSG00000004139.8,SARM1,coding,chr17:26691377-26728046	ENSG00000083720.7,OXCT1,coding,chr5:41730166-41870621	0.170591	13	0.619326
ENSG00000004139.8,SARM1,coding,chr17:26691377-26728046	ENSG00000004838.9,ZMYND10,coding,chr3:50378540-50384283	0.139012	14	0.619326
ENSG00000004139.8,SARM1,coding,chr17:26691377-26728046	ENSG00000089682.11,RBM41,coding,chrX:106307649-106362057	-0.0926136	15	0.619326
ENSG00000004399.8,PLXND1,coding,chr3:129274017-129325661	ENSG00000135636.8,DYSF,coding,chr2:71680851-71913898	0.596178	1	0.773456
ENSG00000004399.8,PLXND1,coding,chr3:129274017-129325661	ENSG00000105711.5,SCN1B,coding,chr19:35521591-35531352	0.460505	2	0.773456
ENSG00000004399.8,PLXND1,coding,chr3:129274017-129325661	ENSG00000003147.13,ICA1,coding,chr7:8152813-8302317	-0.452603	3	0.773456
ENSG00000004399.8,PLXND1,coding,chr3:129274017-129325661	ENSG00000039523.11,FAM65A,coding,chr16:67552320-67580689	0.390887	4	0.773456
ENSG00000004399.8,PLXND1,coding,chr3:129274017-129325661	ENSG00000068078.12,FGFR3,coding,chr4:1795033-1810599	0.369214	5	0.773456
ENSG00000004399.8,PLXND1,coding,chr3:129274017-129325661	ENSG00000008324.6,SS18L2,coding,chr3:42623331-42636606	-0.358563	6	0.773456
ENSG00000004399.8,PLXND1,coding,chr3:129274017-129325661	ENSG00000006638.6,TBXA2R,coding,chr19:3594503-3606831	0.351034	7	0.773456
ENSG00000004399.8,PLXND1,coding,chr3:129274017-129325661	ENSG00000101384.6,JAG1,coding,chr20:10618331-10654608	0.328682	8	0.773456
ENSG00000004399.8,PLXND1,coding,chr3:129274017-129325661	ENSG00000003137.4,CYP26B1,coding,chr2:72356366-72375167	0.29516	9	0.773456
ENSG00000004399.8,PLXND1,coding,chr3:129274017-129325661	ENSG00000006007.7,GDE1,coding,chr16:19513014-19533467	-0.280945	10	0.773456
ENSG00000004399.8,PLXND1,coding,chr3:129274017-129325661	ENSG00000004776.5,HSPB6,coding,chr19:36245469-36247930	0.236102	11	0.773456
ENSG00000004399.8,PLXND1,coding,chr3:129274017-129325661	ENSG00000007202.7,KIAA0100,coding,chr17:26941458-26972472	0.234231	12	0.773456
ENSG00000004399.8,PLXND1,coding,chr3:129274017-129325661	ENSG00000001617.7,SEMA3F,coding,chr3:50192477-50226508	0.219738	13	0.773456
ENSG00000004399.8,PLXND1,coding,chr3:129274017-129325661	ENSG00000000457.8,SCYL3,coding,chr1:169821803-169863408	-0.208489	14	0.773456
ENSG00000004399.8,PLXND1,coding,chr3:129274017-129325661	ENSG00000003400.10,CASP10,coding,chr2:202047603-202094129	0.205764	15	0.773456
ENSG00000004399.8,PLXND1,coding,chr3:129274017-129325661	ENSG00000001630.10,CYP51A1,coding,chr7:91741464-91772266	0.176568	16	0.773456
ENSG00000004399.8,PLXND1,coding,chr3:129274017-129325661	ENSG00000000003.9,TSPAN6,coding,chrX:99883666-99894988	-0.16409	17	0.773456
ENSG00000004399.8,PLXND1,coding,chr3:129274017-129325661	ENSG00000138801.4,PAPSS1,coding,chr4:108511432-108641608	-0.163041	18	0.773456
ENSG00000004399.8,PLXND1,coding,chr3:129274017-129325661	ENSG00000002549.7,LAP3,coding,chr4:17578814-17609595	0.161861	19	0.773456
ENSG00000004399.8,PLXND1,coding,chr3:129274017-129325661	ENSG00000027075.9,PRKCH,coding,chr14:61654276-62017694	0.155469	20	0.773456
ENSG00000004399.8,PLXND1,coding,chr3:129274017-129325661	ENSG00000003436.10,TFPI,coding,chr2:188328956-188430487	0.12858	21	0.773456
ENSG00000004399.8,PLXND1,coding,chr3:129274017-129325661	ENSG00000112499.7,SLC22A2,coding,chr6:160592092-160698670	-0.106122	22	0.773456
ENSG00000004399.8,PLXND1,coding,chr3:129274017-129325661	ENSG00000172575.6,RASGRP1,coding,chr15:38780303-38857776	-0.0654642	23	0.773456
ENSG00000004455.11,AK2,coding,chr1:33473584-33546597	ENSG00000006042.5,TMEM98,coding,chr17:31254927-31268667	-0.403763	1	0.74223
ENSG00000004455.11,AK2,coding,chr1:33473584-33546597	ENSG00000008018.7,PSMB1,coding,chr6:170844204-170862429	0.396104	2	0.74223
ENSG00000004455.11,AK2,coding,chr1:33473584-33546597	ENSG00000106399.7,RPA3,coding,chr7:7676148-7758238	0.367324	3	0.74223
ENSG00000004455.11,AK2,coding,chr1:33473584-33546597	ENSG00000002587.5,HS3ST1,coding,chr4:11394773-11431389	-0.357922	4	0.74223
ENSG00000004455.11,AK2,coding,chr1:33473584-33546597	ENSG00000004779.4,NDUFAB1,coding,chr16:23592322-23607677	0.348285	5	0.74223
ENSG00000004455.11,AK2,coding,chr1:33473584-33546597	ENSG00000000419.7,DPM1,coding,chr20:49551403-49575092	0.344794	6	0.74223
ENSG00000004455.11,AK2,coding,chr1:33473584-33546597	ENSG00000042445.9,RETSAT,coding,chr2:85569210-85581743	-0.30259	7	0.74223
ENSG00000004455.11,AK2,coding,chr1:33473584-33546597	ENSG00000025800.8,KPNA6,coding,chr1:32573638-32642169	0.279373	8	0.74223
ENSG00000004455.11,AK2,coding,chr1:33473584-33546597	ENSG00000002726.14,ABP1,coding,chr7:150521714-150558592	0.275112	9	0.74223
ENSG00000004455.11,AK2,coding,chr1:33473584-33546597	ENSG00000153292.10,GPR110,coding,chr6:46963106-47010099	0.270326	10	0.74223
ENSG00000004455.11,AK2,coding,chr1:33473584-33546597	ENSG00000005471.11,ABCB4,coding,chr7:87031012-87109751	-0.264606	11	0.74223
ENSG00000004455.11,AK2,coding,chr1:33473584-33546597	ENSG00000004777.10,ARHGAP33,coding,chr19:36266416-36279724	0.252195	12	0.74223
ENSG00000004455.11,AK2,coding,chr1:33473584-33546597	ENSG00000003400.10,CASP10,coding,chr2:202047603-202094129	0.250834	13	0.74223
ENSG00000004455.11,AK2,coding,chr1:33473584-33546597	ENSG00000001036.8,FUCA2,coding,chr6:143816613-143832827	0.246029	14	0.74223
ENSG00000004455.11,AK2,coding,chr1:33473584-33546597	ENSG00000000971.10,CFH,coding,chr1:196621007-196716634	-0.241273	15	0.74223
ENSG00000004455.11,AK2,coding,chr1:33473584-33546597	ENSG00000046651.9,OFD1,coding,chrX:13752831-13787480	0.222992	16	0.74223
ENSG00000004455.11,AK2,coding,chr1:33473584-33546597	ENSG00000000457.8,SCYL3,coding,chr1:169821803-169863408	-0.191687	17	0.74223
ENSG00000004455.11,AK2,coding,chr1:33473584-33546597	ENSG00000001497.12,LAS1L,coding,chrX:64732461-64754655	0.182271	18	0.74223
ENSG00000004455.11,AK2,coding,chr1:33473584-33546597	ENSG00000001084.6,GCLC,coding,chr6:53362138-53481768	-0.164006	19	0.74223
ENSG00000004455.11,AK2,coding,chr1:33473584-33546597	ENSG00000001461.11,NIPAL3,coding,chr1:24742283-24799466	0.108193	20	0.74223
ENSG00000004455.11,AK2,coding,chr1:33473584-33546597	ENSG00000005238.13,FAM214B,coding,chr9:35104108-35115999	-0.0947913	21	0.74223
ENSG00000004455.11,AK2,coding,chr1:33473584-33546597	ENSG00000005893.11,LAMP2,coding,chrX:119561681-119603220	-0.0763783	22	0.74223
ENSG00000004455.11,AK2,coding,chr1:33473584-33546597	ENSG00000003436.10,TFPI,coding,chr2:188328956-188430487	-0.0499016	23	0.74223
ENSG00000004455.11,AK2,coding,chr1:33473584-33546597	ENSG00000106346.7,USP42,coding,chr7:6144514-6201195	0.0494585	24	0.74223
ENSG00000004455.11,AK2,coding,chr1:33473584-33546597	ENSG00000007312.7,CD79B,coding,chr17:62006099-62009714	-0.0360018	25	0.74223
ENSG00000004455.11,AK2,coding,chr1:33473584-33546597	ENSG00000038219.8,BOD1L,coding,chr4:13570361-13629347	-0.0156162	26	0.74223
ENSG00000004468.6,CD38,coding,chr4:15779897-15851069	ENSG00000026751.11,SLAMF7,coding,chr1:160709036-160724611	0.748741	1	0.763427
ENSG00000004468.6,CD38,coding,chr4:15779897-15851069	ENSG00000005844.11,ITGAL,coding,chr16:30483978-30534289	0.702106	2	0.763427
ENSG00000004468.6,CD38,coding,chr4:15779897-15851069	ENSG00000000938.7,FGR,coding,chr1:27938574-27961788	0.588579	3	0.763427
ENSG00000004468.6,CD38,coding,chr4:15779897-15851069	ENSG00000002549.7,LAP3,coding,chr4:17578814-17609595	0.521858	4	0.763427
ENSG00000004468.6,CD38,coding,chr4:15779897-15851069	ENSG00000059378.7,PARP12,coding,chr7:139723543-139763521	0.425975	5	0.763427
ENSG00000004468.6,CD38,coding,chr4:15779897-15851069	ENSG00000005059.11,CCDC109B,coding,chr4:110481360-110609874	0.380403	6	0.763427
ENSG00000004468.6,CD38,coding,chr4:15779897-15851069	ENSG00000056558.6,TRAF1,coding,chr9:123664670-123691451	0.314859	7	0.763427
ENSG00000004468.6,CD38,coding,chr4:15779897-15851069	ENSG00000011009.5,LYPLA2,coding,chr1:24117459-24122029	0.256183	8	0.763427
ENSG00000004468.6,CD38,coding,chr4:15779897-15851069	ENSG00000004455.11,AK2,coding,chr1:33473584-33546597	0.213799	9	0.763427
ENSG00000004468.6,CD38,coding,chr4:15779897-15851069	ENSG00000062038.8,CDH3,coding,chr16:68670091-68756519	-0.165003	10	0.763427
ENSG00000004468.6,CD38,coding,chr4:15779897-15851069	ENSG00000034239.5,EFCAB1,coding,chr8:49623347-49647870	0.152963	11	0.763427
ENSG00000004468.6,CD38,coding,chr4:15779897-15851069	ENSG00000007047.8,MARK4,coding,chr19:45754549-45808541	-0.0258282	12	0.763427
ENSG00000004478.5,FKBP4,coding,chr12:2904118-2914576	ENSG00000006831.9,ADIPOR2,coding,chr12:1797739-1897844	0.514988	1	0.711536
ENSG00000004478.5,FKBP4,coding,chr12:2904118-2914576	ENSG00000080824.13,HSP90AA1,coding,chr14:102547105-102606036	0.466394	2	0.711536
ENSG00000004478.5,FKBP4,coding,chr12:2904118-2914576	ENSG00000086061.10,DNAJA1,coding,chr9:33025208-33039905	0.451811	3	0.711536
ENSG00000004478.5,FKBP4,coding,chr12:2904118-2914576	ENSG00000023734.6,STRAP,coding,chr12:16035324-16056412	0.437053	4	0.711536
ENSG00000004478.5,FKBP4,coding,chr12:2904118-2914576	ENSG00000000460.11,C1orf112,coding,chr1:169631244-169823221	0.331465	5	0.711536
ENSG00000004478.5,FKBP4,coding,chr12:2904118-2914576	ENSG00000090447.6,TFAP4,coding,chr16:4307186-4323001	0.330927	6	0.711536
ENSG00000004478.5,FKBP4,coding,chr12:2904118-2914576	ENSG00000055118.9,KCNH2,coding,chr7:150642048-150675403	0.312698	7	0.711536
ENSG00000004478.5,FKBP4,coding,chr12:2904118-2914576	ENSG00000000419.7,DPM1,coding,chr20:49551403-49575092	0.286581	8	0.711536
ENSG00000004478.5,FKBP4,coding,chr12:2904118-2914576	ENSG00000000938.7,FGR,coding,chr1:27938574-27961788	-0.263557	9	0.711536
ENSG00000004478.5,FKBP4,coding,chr12:2904118-2914576	ENSG00000008988.5,RPS20,coding,chr8:56979853-56987069	0.193687	10	0.711536
ENSG00000004478.5,FKBP4,coding,chr12:2904118-2914576	ENSG00000005379.10,BZRAP1,coding,chr17:56378597-56406152	-0.183323	11	0.711536
ENSG00000004478.5,FKBP4,coding,chr12:2904118-2914576	ENSG00000100629.11,CEP128,coding,chr14:80943329-81425861	0.0990974	12	0.711536
ENSG00000004478.5,FKBP4,coding,chr12:2904118-2914576	ENSG00000050344.6,NFE2L3,coding,chr7:26191859-26226745	-0.0901672	13	0.711536
ENSG00000004478.5,FKBP4,coding,chr12:2904118-2914576	ENSG00000002834.11,LASP1,coding,chr17:37026255-37078023	-0.080657	14	0.711536
ENSG00000004478.5,FKBP4,coding,chr12:2904118-2914576	ENSG00000079999.8,KEAP1,coding,chr19:10596795-10614054	-0.0772183	15	0.711536
ENSG00000004478.5,FKBP4,coding,chr12:2904118-2914576	ENSG00000013561.13,RNF14,coding,chr5:141337892-141369856	0.0510781	16	0.711536
ENSG00000004478.5,FKBP4,coding,chr12:2904118-2914576	ENSG00000073921.12,PICALM,coding,chr11:85668726-85780924	-0.0194016	17	0.711536
ENSG00000004478.5,FKBP4,coding,chr12:2904118-2914576	ENSG00000072041.10,SLC6A15,coding,chr12:85253491-85307394	0.0173013	18	0.711536
ENSG00000004487.10,KDM1A,coding,chr1:23345940-23410182	ENSG00000092199.12,HNRNPC,coding,chr14:21677294-21737653	0.537446	1	0.830956
ENSG00000004487.10,KDM1A,coding,chr1:23345940-23410182	ENSG00000005156.5,LIG3,coding,chr17:33307541-33332083	0.530098	2	0.830956
ENSG00000004487.10,KDM1A,coding,chr1:23345940-23410182	ENSG00000057757.5,PITHD1,coding,chr1:24104894-24114722	0.522425	3	0.830956
ENSG00000004487.10,KDM1A,coding,chr1:23345940-23410182	ENSG00000007923.11,DNAJC11,coding,chr1:6694227-6761984	0.513325	4	0.830956
ENSG00000004487.10,KDM1A,coding,chr1:23345940-23410182	ENSG00000067369.7,TP53BP1,coding,chr15:43699406-43802926	0.450075	5	0.830956
ENSG00000004487.10,KDM1A,coding,chr1:23345940-23410182	ENSG00000000460.11,C1orf112,coding,chr1:169631244-169823221	0.443447	6	0.830956
ENSG00000004487.10,KDM1A,coding,chr1:23345940-23410182	ENSG00000001167.10,NFYA,coding,chr6:41040683-41067715	0.439995	7	0.830956
ENSG00000004487.10,KDM1A,coding,chr1:23345940-23410182	ENSG00000004700.11,RECQL,coding,chr12:21621844-21654603	0.410013	8	0.830956
ENSG00000004487.10,KDM1A,coding,chr1:23345940-23410182	ENSG00000000003.9,TSPAN6,coding,chrX:99883666-99894988	0.382071	9	0.830956
ENSG00000004487.10,KDM1A,coding,chr1:23345940-23410182	ENSG00000003400.10,CASP10,coding,chr2:202047603-202094129	-0.367159	10	0.830956
ENSG00000004487.10,KDM1A,coding,chr1:23345940-23410182	ENSG00000000419.7,DPM1,coding,chr20:49551403-49575092	0.34878	11	0.830956
ENSG00000004487.10,KDM1A,coding,chr1:23345940-23410182	ENSG00000000938.7,FGR,coding,chr1:27938574-27961788	-0.347925	12	0.830956
ENSG00000004487.10,KDM1A,coding,chr1:23345940-23410182	ENSG00000004779.4,NDUFAB1,coding,chr16:23592322-23607677	0.329059	13	0.830956
ENSG00000004487.10,KDM1A,coding,chr1:23345940-23410182	ENSG00000011523.8,CEP68,coding,chr2:65283499-65314138	0.309248	14	0.830956
ENSG00000004487.10,KDM1A,coding,chr1:23345940-23410182	ENSG00000006453.9,BAIAP2L1.1,coding,chr7:97920962-98030380	-0.301596	15	0.830956
ENSG00000004487.10,KDM1A,coding,chr1:23345940-23410182	ENSG00000006062.8,MAP3K14,coding,chr17:43340487-43394414	-0.277312	16	0.830956
ENSG00000004487.10,KDM1A,coding,chr1:23345940-23410182	ENSG00000003249.8,DBNDD1,coding,chr16:90071272-90086536	0.262127	17	0.830956
ENSG00000004487.10,KDM1A,coding,chr1:23345940-23410182	ENSG00000001497.12,LAS1L,coding,chrX:64732461-64754655	0.254413	18	0.830956
ENSG00000004487.10,KDM1A,coding,chr1:23345940-23410182	ENSG00000010072.10,C1orf124,coding,chr1:231472849-231490769	0.249436	19	0.830956
ENSG00000004487.10,KDM1A,coding,chr1:23345940-23410182	ENSG00000001084.6,GCLC,coding,chr6:53362138-53481768	0.236096	20	0.830956
ENSG00000004487.10,KDM1A,coding,chr1:23345940-23410182	ENSG00000012504.9,NR1H4,coding,chr12:100867485-100958191	-0.229582	21	0.830956
ENSG00000004487.10,KDM1A,coding,chr1:23345940-23410182	ENSG00000002726.14,ABP1,coding,chr7:150521714-150558592	-0.220667	22	0.830956
ENSG00000004487.10,KDM1A,coding,chr1:23345940-23410182	ENSG00000011009.5,LYPLA2,coding,chr1:24117459-24122029	0.216489	23	0.830956
ENSG00000004487.10,KDM1A,coding,chr1:23345940-23410182	ENSG00000001460.12,C1orf201,coding,chr1:24683488-24743424	0.215551	24	0.830956
ENSG00000004487.10,KDM1A,coding,chr1:23345940-23410182	ENSG00000000457.8,SCYL3,coding,chr1:169821803-169863408	0.19935	25	0.830956
ENSG00000004487.10,KDM1A,coding,chr1:23345940-23410182	ENSG00000001461.11,NIPAL3,coding,chr1:24742283-24799466	0.169084	26	0.830956
ENSG00000004487.10,KDM1A,coding,chr1:23345940-23410182	ENSG00000006468.9,ETV1,coding,chr7:13930852-14031050	0.16536	27	0.830956
ENSG00000004487.10,KDM1A,coding,chr1:23345940-23410182	ENSG00000002016.11,RAD52,coding,chr12:1021242-1100356	0.0941698	28	0.830956
ENSG00000004487.10,KDM1A,coding,chr1:23345940-23410182	ENSG00000008324.6,SS18L2,coding,chr3:42623331-42636606	0.083351	29	0.830956
ENSG00000004487.10,KDM1A,coding,chr1:23345940-23410182	ENSG00000001561.5,ENPP4,coding,chr6:46097700-46114435	0.0798327	30	0.830956
ENSG00000004487.10,KDM1A,coding,chr1:23345940-23410182	ENSG00000207997.1,MIR644A,miRNA,chr20:33054129-33054223	0.0595161	31	0.830956
ENSG00000004534.9,RBM6,coding,chr3:49977439-50137478	ENSG00000003756.11,RBM5,coding,chr3:50126340-50156454	0.725197	1	0.834859
ENSG00000004534.9,RBM6,coding,chr3:49977439-50137478	ENSG00000005801.11,ZNF195,coding,chr11:3360490-3400448	0.634851	2	0.834859
ENSG00000004534.9,RBM6,coding,chr3:49977439-50137478	ENSG00000002016.11,RAD52,coding,chr12:1021242-1100356	0.625749	3	0.834859
ENSG00000004534.9,RBM6,coding,chr3:49977439-50137478	ENSG00000003509.11,C2orf56,coding,chr2:37458773-37480546	0.621034	4	0.834859
ENSG00000004534.9,RBM6,coding,chr3:49977439-50137478	ENSG00000001631.9,KRIT1,coding,chr7:91828282-91875480	0.455272	5	0.834859
ENSG00000004534.9,RBM6,coding,chr3:49977439-50137478	ENSG00000001630.10,CYP51A1,coding,chr7:91741464-91772266	-0.440577	6	0.834859
ENSG00000004534.9,RBM6,coding,chr3:49977439-50137478	ENSG00000003056.3,M6PR,coding,chr12:9092958-9102551	-0.411844	7	0.834859
ENSG00000004534.9,RBM6,coding,chr3:49977439-50137478	ENSG00000001629.5,ANKIB1,coding,chr7:91875547-92030698	0.329034	8	0.834859
ENSG00000004534.9,RBM6,coding,chr3:49977439-50137478	ENSG00000001036.8,FUCA2,coding,chr6:143816613-143832827	0.291119	9	0.834859
ENSG00000004534.9,RBM6,coding,chr3:49977439-50137478	ENSG00000005238.13,FAM214B,coding,chr9:35104108-35115999	0.215455	10	0.834859
ENSG00000004534.9,RBM6,coding,chr3:49977439-50137478	ENSG00000000419.7,DPM1,coding,chr20:49551403-49575092	0.195718	11	0.834859
ENSG00000004534.9,RBM6,coding,chr3:49977439-50137478	ENSG00000001460.12,C1orf201,coding,chr1:24683488-24743424	0.192107	12	0.834859
ENSG00000004534.9,RBM6,coding,chr3:49977439-50137478	ENSG00000065882.9,TBC1D1,coding,chr4:37892707-38140796	0.176507	13	0.834859
ENSG00000004534.9,RBM6,coding,chr3:49977439-50137478	ENSG00000002834.11,LASP1,coding,chr17:37026255-37078023	-0.137642	14	0.834859
ENSG00000004534.9,RBM6,coding,chr3:49977439-50137478	ENSG00000008517.12,IL32,coding,chr16:3115297-3131908	0.128223	15	0.834859
ENSG00000004534.9,RBM6,coding,chr3:49977439-50137478	ENSG00000003989.12,SLC7A2,coding,chr8:17354596-17428082	-0.0806924	16	0.834859
ENSG00000004534.9,RBM6,coding,chr3:49977439-50137478	ENSG00000005812.6,FBXL3,coding,chr13:77566739-77601330	0.0603972	17	0.834859
ENSG00000004660.9,CAMKK1,coding,chr17:3763608-3796338	ENSG00000074370.12,ATP2A3,coding,chr17:3822868-3867736	0.399885	1	0.670802
ENSG00000004660.9,CAMKK1,coding,chr17:3763608-3796338	ENSG00000005961.11,ITGA2B,coding,chr17:42449549-42466873	0.38597	2	0.670802
ENSG00000004660.9,CAMKK1,coding,chr17:3763608-3796338	ENSG00000186897.3,C1QL4,coding,chr12:49726199-49730971	0.376979	3	0.670802
ENSG00000004660.9,CAMKK1,coding,chr17:3763608-3796338	ENSG00000004139.8,SARM1,coding,chr17:26691377-26728046	0.353504	4	0.670802
ENSG00000004660.9,CAMKK1,coding,chr17:3763608-3796338	ENSG00000026025.8,VIM,coding,chr10:17270257-17279592	-0.352602	5	0.670802
ENSG00000004660.9,CAMKK1,coding,chr17:3763608-3796338	ENSG00000058056.4,USP13,coding,chr3:179370542-179507189	-0.331061	6	0.670802
ENSG00000004660.9,CAMKK1,coding,chr17:3763608-3796338	ENSG00000004777.10,ARHGAP33,coding,chr19:36266416-36279724	0.304374	7	0.670802
ENSG00000004660.9,CAMKK1,coding,chr17:3763608-3796338	ENSG00000000003.9,TSPAN6,coding,chrX:99883666-99894988	-0.2864	8	0.670802
ENSG00000004660.9,CAMKK1,coding,chr17:3763608-3796338	ENSG00000001084.6,GCLC,coding,chr6:53362138-53481768	-0.284744	9	0.670802
ENSG00000004660.9,CAMKK1,coding,chr17:3763608-3796338	ENSG00000042493.10,CAPG,coding,chr2:85621345-85645555	0.249644	10	0.670802
ENSG00000004660.9,CAMKK1,coding,chr17:3763608-3796338	ENSG00000111696.7,NT5DC3,coding,chr12:104164230-104234975	0.224604	11	0.670802
ENSG00000004660.9,CAMKK1,coding,chr17:3763608-3796338	ENSG00000004838.9,ZMYND10,coding,chr3:50378540-50384283	-0.220495	12	0.670802
ENSG00000004660.9,CAMKK1,coding,chr17:3763608-3796338	ENSG00000013016.10,EHD3,coding,chr2:31456879-31492313	0.200239	13	0.670802
ENSG00000004660.9,CAMKK1,coding,chr17:3763608-3796338	ENSG00000085552.11,IGSF9,coding,chr1:159896828-159915394	0.194337	14	0.670802
ENSG00000004660.9,CAMKK1,coding,chr17:3763608-3796338	ENSG00000019485.8,PRDM11,coding,chr11:45115563-45247734	0.192215	15	0.670802
ENSG00000004660.9,CAMKK1,coding,chr17:3763608-3796338	ENSG00000002016.11,RAD52,coding,chr12:1021242-1100356	0.134624	16	0.670802
ENSG00000004660.9,CAMKK1,coding,chr17:3763608-3796338	ENSG00000022567.5,SLC45A4,coding,chr8:142217264-142318404	-0.108221	17	0.670802
ENSG00000004660.9,CAMKK1,coding,chr17:3763608-3796338	ENSG00000063169.5,GLTSCR1,coding,chr19:48111452-48206534	0.0842691	18	0.670802
ENSG00000004660.9,CAMKK1,coding,chr17:3763608-3796338	ENSG00000006625.11,GGCT,coding,chr7:30536236-30544460	0.0512197	19	0.670802
ENSG00000004700.11,RECQL,coding,chr12:21621844-21654603	ENSG00000047315.10,POLR2B,coding,chr4:57843887-57897334	0.772381	1	0.916923
ENSG00000004700.11,RECQL,coding,chr12:21621844-21654603	ENSG00000113712.10,CSNK1A1,coding,chr5:148871759-148931007	0.74546	2	0.916923
ENSG00000004700.11,RECQL,coding,chr12:21621844-21654603	ENSG00000003056.3,M6PR,coding,chr12:9092958-9102551	0.734612	3	0.916923
ENSG00000004700.11,RECQL,coding,chr12:21621844-21654603	ENSG00000000460.11,C1orf112,coding,chr1:169631244-169823221	0.581049	4	0.916923
ENSG00000004700.11,RECQL,coding,chr12:21621844-21654603	ENSG00000008405.6,CRY1,coding,chr12:107385141-107487607	0.54271	5	0.916923
ENSG00000004700.11,RECQL,coding,chr12:21621844-21654603	ENSG00000000419.7,DPM1,coding,chr20:49551403-49575092	0.542401	6	0.916923
ENSG00000004700.11,RECQL,coding,chr12:21621844-21654603	ENSG00000001630.10,CYP51A1,coding,chr7:91741464-91772266	0.529061	7	0.916923
ENSG00000004700.11,RECQL,coding,chr12:21621844-21654603	ENSG00000003393.10,ALS2,coding,chr2:202565276-202645912	0.520825	8	0.916923
ENSG00000004700.11,RECQL,coding,chr12:21621844-21654603	ENSG00000003402.12,CFLAR,coding,chr2:201980826-202029033	0.510233	9	0.916923
ENSG00000004700.11,RECQL,coding,chr12:21621844-21654603	ENSG00000010017.8,RANBP9,coding,chr6:13621729-13711953	0.499217	10	0.916923
ENSG00000004700.11,RECQL,coding,chr12:21621844-21654603	ENSG00000063978.10,RNF4,coding,chr4:2463946-2627047	0.493064	11	0.916923
ENSG00000004700.11,RECQL,coding,chr12:21621844-21654603	ENSG00000001167.10,NFYA,coding,chr6:41040683-41067715	0.488067	12	0.916923
ENSG00000004700.11,RECQL,coding,chr12:21621844-21654603	ENSG00000111711.4,GOLT1B,coding,chr12:21654714-21671091	0.48264	13	0.916923
ENSG00000004700.11,RECQL,coding,chr12:21621844-21654603	ENSG00000000457.8,SCYL3,coding,chr1:169821803-169863408	0.456526	14	0.916923
ENSG00000004700.11,RECQL,coding,chr12:21621844-21654603	ENSG00000002549.7,LAP3,coding,chr4:17578814-17609595	0.456054	15	0.916923
ENSG00000004700.11,RECQL,coding,chr12:21621844-21654603	ENSG00000004897.5,CDC27,coding,chr17:45195068-45266788	0.422733	16	0.916923
ENSG00000004700.11,RECQL,coding,chr12:21621844-21654603	ENSG00000004487.10,KDM1A,coding,chr1:23345940-23410182	0.410013	17	0.916923
ENSG00000004700.11,RECQL,coding,chr12:21621844-21654603	ENSG00000023697.8,DERA,coding,chr12:16064105-16190220	0.402752	18	0.916923
ENSG00000004700.11,RECQL,coding,chr12:21621844-21654603	ENSG00000062582.9,MRPS24,coding,chr7:43906156-43909492	-0.39963	19	0.916923
ENSG00000004700.11,RECQL,coding,chr12:21621844-21654603	ENSG00000052802.8,MSMO1,coding,chr4:166248774-166264312	0.287056	20	0.916923
ENSG00000004700.11,RECQL,coding,chr12:21621844-21654603	ENSG00000002330.8,BAD,coding,chr11:64037301-64052176	-0.28478	21	0.916923
ENSG00000004700.11,RECQL,coding,chr12:21621844-21654603	ENSG00000144445.10,C2orf67,coding,chr2:210885434-211036107	0.258558	22	0.916923
ENSG00000004700.11,RECQL,coding,chr12:21621844-21654603	ENSG00000011009.5,LYPLA2,coding,chr1:24117459-24122029	-0.243278	23	0.916923
ENSG00000004700.11,RECQL,coding,chr12:21621844-21654603	ENSG00000001461.11,NIPAL3,coding,chr1:24742283-24799466	0.224446	24	0.916923
ENSG00000004700.11,RECQL,coding,chr12:21621844-21654603	ENSG00000006468.9,ETV1,coding,chr7:13930852-14031050	0.211945	25	0.916923
ENSG00000004700.11,RECQL,coding,chr12:21621844-21654603	ENSG00000015413.5,DPEP1,coding,chr16:89679715-89704839	-0.211432	26	0.916923
ENSG00000004700.11,RECQL,coding,chr12:21621844-21654603	ENSG00000002726.14,ABP1,coding,chr7:150521714-150558592	-0.186266	27	0.916923
ENSG00000004700.11,RECQL,coding,chr12:21621844-21654603	ENSG00000003137.4,CYP26B1,coding,chr2:72356366-72375167	0.182057	28	0.916923
ENSG00000004700.11,RECQL,coding,chr12:21621844-21654603	ENSG00000001460.12,C1orf201,coding,chr1:24683488-24743424	-0.167696	29	0.916923
ENSG00000004700.11,RECQL,coding,chr12:21621844-21654603	ENSG00000005471.11,ABCB4,coding,chr7:87031012-87109751	0.0617022	30	0.916923
ENSG00000004700.11,RECQL,coding,chr12:21621844-21654603	ENSG00000003436.10,TFPI,coding,chr2:188328956-188430487	0.0389896	31	0.916923
ENSG00000004700.11,RECQL,coding,chr12:21621844-21654603	ENSG00000123179.8,EBPL,coding,chr13:50234858-50265623	-0.0328127	32	0.916923
ENSG00000004766.11,CCDC132,coding,chr7:92861652-92988338	ENSG00000001631.9,KRIT1,coding,chr7:91828282-91875480	0.837576	1	0.870378
ENSG00000004766.11,CCDC132,coding,chr7:92861652-92988338	ENSG00000001629.5,ANKIB1,coding,chr7:91875547-92030698	0.813195	2	0.870378
ENSG00000004766.11,CCDC132,coding,chr7:92861652-92988338	ENSG00000091140.5,DLD,coding,chr7:107531414-107572175	0.64283	3	0.870378
ENSG00000004766.11,CCDC132,coding,chr7:92861652-92988338	ENSG00000000457.8,SCYL3,coding,chr1:169821803-169863408	0.63418	4	0.870378
ENSG00000004766.11,CCDC132,coding,chr7:92861652-92988338	ENSG00000001561.5,ENPP4,coding,chr6:46097700-46114435	0.615913	5	0.870378
ENSG00000004766.11,CCDC132,coding,chr7:92861652-92988338	ENSG00000052795.8,FNIP2,coding,chr4:159690289-159829201	0.599254	6	0.870378
ENSG00000004766.11,CCDC132,coding,chr7:92861652-92988338	ENSG00000000419.7,DPM1,coding,chr20:49551403-49575092	0.532292	7	0.870378
ENSG00000004766.11,CCDC132,coding,chr7:92861652-92988338	ENSG00000005469.7,CROT,coding,chr7:86974996-87029111	0.51985	8	0.870378
ENSG00000004766.11,CCDC132,coding,chr7:92861652-92988338	ENSG00000005020.7,SKAP2,coding,chr7:26706680-27034858	0.385822	9	0.870378
ENSG00000004766.11,CCDC132,coding,chr7:92861652-92988338	ENSG00000001036.8,FUCA2,coding,chr6:143816613-143832827	0.370171	10	0.870378
ENSG00000004766.11,CCDC132,coding,chr7:92861652-92988338	ENSG00000005448.12,WDR54,coding,chr2:74648804-74652882	-0.342988	11	0.870378
ENSG00000004766.11,CCDC132,coding,chr7:92861652-92988338	ENSG00000103174.6,NAGPA,coding,chr16:5074844-5084142	-0.134496	12	0.870378
ENSG00000004766.11,CCDC132,coding,chr7:92861652-92988338	ENSG00000000938.7,FGR,coding,chr1:27938574-27961788	-0.00669521	13	0.870378
ENSG00000004776.5,HSPB6,coding,chr19:36245469-36247930	ENSG00000128591.11,FLNC,coding,chr7:128470430-128499328	0.552063	1	0.59425
ENSG00000004776.5,HSPB6,coding,chr19:36245469-36247930	ENSG00000008056.8,SYN1,coding,chrX:47431302-47479252	0.45693	2	0.59425
ENSG00000004776.5,HSPB6,coding,chr19:36245469-36247930	ENSG00000005243.4,COPZ2,coding,chr17:46103534-46115139	0.442459	3	0.59425
ENSG00000004776.5,HSPB6,coding,chr19:36245469-36247930	ENSG00000057593.9,F7,coding,chr13:113760104-113774995	0.341818	4	0.59425
ENSG00000004776.5,HSPB6,coding,chr19:36245469-36247930	ENSG00000187994.6,RINL,coding,chr19:39358469-39368894	0.322056	5	0.59425
ENSG00000004776.5,HSPB6,coding,chr19:36245469-36247930	ENSG00000010319.2,SEMA3G,coding,chr3:52467068-52479101	0.320685	6	0.59425
ENSG00000004776.5,HSPB6,coding,chr19:36245469-36247930	ENSG00000011422.6,PLAUR,coding,chr19:44150270-44174502	-0.276811	7	0.59425
ENSG00000004776.5,HSPB6,coding,chr19:36245469-36247930	ENSG00000004809.9,SLC22A16,coding,chr6:110745889-110797844	0.267097	8	0.59425
ENSG00000004776.5,HSPB6,coding,chr19:36245469-36247930	ENSG00000000005.5,TNMD,coding,chrX:99839798-99854882	0.253245	9	0.59425
ENSG00000004776.5,HSPB6,coding,chr19:36245469-36247930	ENSG00000005022.5,SLC25A5,coding,chrX:118602362-118605282	-0.251643	10	0.59425
ENSG00000004776.5,HSPB6,coding,chr19:36245469-36247930	ENSG00000004399.8,PLXND1,coding,chr3:129274017-129325661	0.236102	11	0.59425
ENSG00000004776.5,HSPB6,coding,chr19:36245469-36247930	ENSG00000001561.5,ENPP4,coding,chr6:46097700-46114435	-0.214392	12	0.59425
ENSG00000004776.5,HSPB6,coding,chr19:36245469-36247930	ENSG00000004139.8,SARM1,coding,chr17:26691377-26728046	0.185915	13	0.59425
ENSG00000004776.5,HSPB6,coding,chr19:36245469-36247930	ENSG00000002330.8,BAD,coding,chr11:64037301-64052176	0.143904	14	0.59425
ENSG00000004776.5,HSPB6,coding,chr19:36245469-36247930	ENSG00000058668.10,ATP2B4,coding,chr1:203595688-203713209	0.116901	15	0.59425
ENSG00000004777.10,ARHGAP33,coding,chr19:36266416-36279724	ENSG00000075702.9,WDR62,coding,chr19:36545782-36596012	0.590547	1	0.82195
ENSG00000004777.10,ARHGAP33,coding,chr19:36266416-36279724	ENSG00000185189.11,NRBP2,coding,chr8:144915763-144924200	0.583109	2	0.82195
ENSG00000004777.10,ARHGAP33,coding,chr19:36266416-36279724	ENSG00000167615.11,LENG8,coding,chr19:54960064-54973217	0.480559	3	0.82195
ENSG00000004777.10,ARHGAP33,coding,chr19:36266416-36279724	ENSG00000002016.11,RAD52,coding,chr12:1021242-1100356	0.457155	4	0.82195
ENSG00000004777.10,ARHGAP33,coding,chr19:36266416-36279724	ENSG00000074855.5,ANO8,coding,chr19:17434031-17445638	0.425771	5	0.82195
ENSG00000004777.10,ARHGAP33,coding,chr19:36266416-36279724	ENSG00000007047.8,MARK4,coding,chr19:45754549-45808541	0.410456	6	0.82195
ENSG00000004777.10,ARHGAP33,coding,chr19:36266416-36279724	ENSG00000013441.10,CLK1,coding,chr2:201717731-201729467	0.393723	7	0.82195
ENSG00000004777.10,ARHGAP33,coding,chr19:36266416-36279724	ENSG00000081760.11,AACS,coding,chr12:125549924-125627873	-0.34121	8	0.82195
ENSG00000004777.10,ARHGAP33,coding,chr19:36266416-36279724	ENSG00000006025.6,OSBPL7,coding,chr17:45884732-45899200	0.332241	9	0.82195
ENSG00000004777.10,ARHGAP33,coding,chr19:36266416-36279724	ENSG00000001497.12,LAS1L,coding,chrX:64732461-64754655	0.307874	10	0.82195
ENSG00000004777.10,ARHGAP33,coding,chr19:36266416-36279724	ENSG00000004660.9,CAMKK1,coding,chr17:3763608-3796338	0.304374	11	0.82195
ENSG00000004777.10,ARHGAP33,coding,chr19:36266416-36279724	ENSG00000005189.14,AC004381.6.1,coding,chr16:20817750-20860990	0.28758	12	0.82195
ENSG00000004777.10,ARHGAP33,coding,chr19:36266416-36279724	ENSG00000000460.11,C1orf112,coding,chr1:169631244-169823221	0.279445	13	0.82195
ENSG00000004777.10,ARHGAP33,coding,chr19:36266416-36279724	ENSG00000003056.3,M6PR,coding,chr12:9092958-9102551	-0.275137	14	0.82195
ENSG00000004777.10,ARHGAP33,coding,chr19:36266416-36279724	ENSG00000000971.10,CFH,coding,chr1:196621007-196716634	-0.260716	15	0.82195
ENSG00000004777.10,ARHGAP33,coding,chr19:36266416-36279724	ENSG00000071794.10,HLTF,coding,chr3:148747913-148804341	0.25965	16	0.82195
ENSG00000004777.10,ARHGAP33,coding,chr19:36266416-36279724	ENSG00000006756.11,ARSD,coding,chrX:2822010-2847392	-0.22932	17	0.82195
ENSG00000004777.10,ARHGAP33,coding,chr19:36266416-36279724	ENSG00000002330.8,BAD,coding,chr11:64037301-64052176	0.220669	18	0.82195
ENSG00000004777.10,ARHGAP33,coding,chr19:36266416-36279724	ENSG00000001630.10,CYP51A1,coding,chr7:91741464-91772266	-0.188728	19	0.82195
ENSG00000004777.10,ARHGAP33,coding,chr19:36266416-36279724	ENSG00000001461.11,NIPAL3,coding,chr1:24742283-24799466	-0.186266	20	0.82195
ENSG00000004777.10,ARHGAP33,coding,chr19:36266416-36279724	ENSG00000003147.13,ICA1,coding,chr7:8152813-8302317	-0.182777	21	0.82195
ENSG00000004777.10,ARHGAP33,coding,chr19:36266416-36279724	ENSG00000004139.8,SARM1,coding,chr17:26691377-26728046	0.161084	22	0.82195
ENSG00000004777.10,ARHGAP33,coding,chr19:36266416-36279724	ENSG00000121316.5,PLBD1,coding,chr12:14656594-14721283	-0.0946064	23	0.82195
ENSG00000004777.10,ARHGAP33,coding,chr19:36266416-36279724	ENSG00000071575.7,TRIB2,coding,chr2:12857014-12882860	-0.0712939	24	0.82195
ENSG00000004777.10,ARHGAP33,coding,chr19:36266416-36279724	ENSG00000004779.4,NDUFAB1,coding,chr16:23592322-23607677	-0.0297386	25	0.82195
ENSG00000004777.10,ARHGAP33,coding,chr19:36266416-36279724	ENSG00000018699.7,TTC27,coding,chr2:32853098-33046118	-0.021726	26	0.82195
ENSG00000004779.4,NDUFAB1,coding,chr16:23592322-23607677	ENSG00000174173.6,RG9MTD1,coding,chr3:101280705-101285290	0.615185	1	0.892282
ENSG00000004779.4,NDUFAB1,coding,chr16:23592322-23607677	ENSG00000000419.7,DPM1,coding,chr20:49551403-49575092	0.614951	2	0.892282
ENSG00000004779.4,NDUFAB1,coding,chr16:23592322-23607677	ENSG00000004961.10,HCCS,coding,chrX:11129420-11141198	0.524836	3	0.892282
ENSG00000004779.4,NDUFAB1,coding,chr16:23592322-23607677	ENSG00000085644.8,ZNF213,coding,chr16:3185056-3192804	-0.519407	4	0.892282
ENSG00000004779.4,NDUFAB1,coding,chr16:23592322-23607677	ENSG00000103353.9,UBFD1,coding,chr16:23568391-23585710	0.51886	5	0.892282
ENSG00000004779.4,NDUFAB1,coding,chr16:23592322-23607677	ENSG00000023572.4,GLRX2,coding,chr1:193065597-193075244	0.500874	6	0.892282
ENSG00000004779.4,NDUFAB1,coding,chr16:23592322-23607677	ENSG00000083093.5,PALB2,coding,chr16:23614487-23652631	0.450814	7	0.892282
ENSG00000004779.4,NDUFAB1,coding,chr16:23592322-23607677	ENSG00000006007.7,GDE1,coding,chr16:19513014-19533467	0.428091	8	0.892282
ENSG00000004779.4,NDUFAB1,coding,chr16:23592322-23607677	ENSG00000007520.3,C16orf42,coding,chr16:1399240-1401912	0.422278	9	0.892282
ENSG00000004779.4,NDUFAB1,coding,chr16:23592322-23607677	ENSG00000099977.9,DDT,coding,chr22:24313553-24322660	0.379616	10	0.892282
ENSG00000004779.4,NDUFAB1,coding,chr16:23592322-23607677	ENSG00000006194.5,ZNF263,coding,chr16:3313799-3341460	0.370326	11	0.892282
ENSG00000004779.4,NDUFAB1,coding,chr16:23592322-23607677	ENSG00000005700.10,IBTK,coding,chr6:82879699-82957471	0.351004	12	0.892282
ENSG00000004779.4,NDUFAB1,coding,chr16:23592322-23607677	ENSG00000166847.5,DCTN5,coding,chr16:23652712-23681195	0.346556	13	0.892282
ENSG00000004779.4,NDUFAB1,coding,chr16:23592322-23607677	ENSG00000005022.5,SLC25A5,coding,chrX:118602362-118605282	0.340025	14	0.892282
ENSG00000004779.4,NDUFAB1,coding,chr16:23592322-23607677	ENSG00000088986.6,DYNLL1,coding,chr12:120907652-120936296	0.332397	15	0.892282
ENSG00000004779.4,NDUFAB1,coding,chr16:23592322-23607677	ENSG00000004487.10,KDM1A,coding,chr1:23345940-23410182	0.329059	16	0.892282
ENSG00000004779.4,NDUFAB1,coding,chr16:23592322-23607677	ENSG00000088832.10,FKBP1A,coding,chr20:1349621-1373806	0.309541	17	0.892282
ENSG00000004779.4,NDUFAB1,coding,chr16:23592322-23607677	ENSG00000005194.10,CIAPIN1,coding,chr16:57462080-57481440	0.290972	18	0.892282
ENSG00000004779.4,NDUFAB1,coding,chr16:23592322-23607677	ENSG00000088448.9,ANKRD10,coding,chr13:111530886-111567416	-0.285039	19	0.892282
ENSG00000004779.4,NDUFAB1,coding,chr16:23592322-23607677	ENSG00000002330.8,BAD,coding,chr11:64037301-64052176	0.279465	20	0.892282
ENSG00000004779.4,NDUFAB1,coding,chr16:23592322-23607677	ENSG00000004139.8,SARM1,coding,chr17:26691377-26728046	-0.254116	21	0.892282
ENSG00000004779.4,NDUFAB1,coding,chr16:23592322-23607677	ENSG00000127540.4,UQCR11,coding,chr19:1597153-1605483	0.22002	22	0.892282
ENSG00000004779.4,NDUFAB1,coding,chr16:23592322-23607677	ENSG00000002745.7,WNT16,coding,chr7:120965420-120981158	-0.214437	23	0.892282
ENSG00000004779.4,NDUFAB1,coding,chr16:23592322-23607677	ENSG00000000003.9,TSPAN6,coding,chrX:99883666-99894988	0.203896	24	0.892282
ENSG00000004779.4,NDUFAB1,coding,chr16:23592322-23607677	ENSG00000003056.3,M6PR,coding,chr12:9092958-9102551	0.159303	25	0.892282
ENSG00000004779.4,NDUFAB1,coding,chr16:23592322-23607677	ENSG00000004848.6,ARX,coding,chrX:25021810-25034065	0.156785	26	0.892282
ENSG00000004779.4,NDUFAB1,coding,chr16:23592322-23607677	ENSG00000107872.8,FBXL15,coding,chr10:104178945-104182893	-0.146698	27	0.892282
ENSG00000004779.4,NDUFAB1,coding,chr16:23592322-23607677	ENSG00000001629.5,ANKIB1,coding,chr7:91875547-92030698	0.144966	28	0.892282
ENSG00000004779.4,NDUFAB1,coding,chr16:23592322-23607677	ENSG00000005187.7,ACSM3,coding,chr16:20621564-20808903	0.08072	29	0.892282
ENSG00000004779.4,NDUFAB1,coding,chr16:23592322-23607677	ENSG00000048991.11,R3HDM1,coding,chr2:136289024-136482840	0.0795666	30	0.892282
ENSG00000004779.4,NDUFAB1,coding,chr16:23592322-23607677	ENSG00000099795.1,NDUFB7,coding,chr19:14676891-14682886	-0.0347755	31	0.892282
ENSG00000004799.6,PDK4,coding,chr7:95212810-95225828	ENSG00000082996.13,RNF13,coding,chr3:149530494-149679926	0.563755	1	0.639383
ENSG00000004799.6,PDK4,coding,chr7:95212810-95225828	ENSG00000135185.7,C7orf23,coding,chr7:86825477-86849903	0.463242	2	0.639383
ENSG00000004799.6,PDK4,coding,chr7:95212810-95225828	ENSG00000001561.5,ENPP4,coding,chr6:46097700-46114435	0.451792	3	0.639383
ENSG00000004799.6,PDK4,coding,chr7:95212810-95225828	ENSG00000001629.5,ANKIB1,coding,chr7:91875547-92030698	0.425382	4	0.639383
ENSG00000004799.6,PDK4,coding,chr7:95212810-95225828	ENSG00000000419.7,DPM1,coding,chr20:49551403-49575092	0.354216	5	0.639383
ENSG00000004799.6,PDK4,coding,chr7:95212810-95225828	ENSG00000000457.8,SCYL3,coding,chr1:169821803-169863408	0.336861	6	0.639383
ENSG00000004799.6,PDK4,coding,chr7:95212810-95225828	ENSG00000114744.4,COMMD2,coding,chr3:149456256-149470286	0.335987	7	0.639383
ENSG00000004799.6,PDK4,coding,chr7:95212810-95225828	ENSG00000057704.6,TMCC3,coding,chr12:94960899-95044338	0.329481	8	0.639383
ENSG00000004799.6,PDK4,coding,chr7:95212810-95225828	ENSG00000001497.12,LAS1L,coding,chrX:64732461-64754655	-0.318155	9	0.639383
ENSG00000004799.6,PDK4,coding,chr7:95212810-95225828	ENSG00000003436.10,TFPI,coding,chr2:188328956-188430487	0.309431	10	0.639383
ENSG00000004799.6,PDK4,coding,chr7:95212810-95225828	ENSG00000003989.12,SLC7A2,coding,chr8:17354596-17428082	0.259836	11	0.639383
ENSG00000004799.6,PDK4,coding,chr7:95212810-95225828	ENSG00000012822.9,CALCOCO1,coding,chr12:54104901-54121529	0.259107	12	0.639383
ENSG00000004799.6,PDK4,coding,chr7:95212810-95225828	ENSG00000005981.8,ASB4,coding,chr7:95107755-95169544	0.230294	13	0.639383
ENSG00000004799.6,PDK4,coding,chr7:95212810-95225828	ENSG00000026036.16,RTEL1,coding,chr20:62290652-62330037	-0.212531	14	0.639383
ENSG00000004799.6,PDK4,coding,chr7:95212810-95225828	ENSG00000153395.5,LPCAT1,coding,chr5:1456594-1524092	0.20024	15	0.639383
ENSG00000004799.6,PDK4,coding,chr7:95212810-95225828	ENSG00000000460.11,C1orf112,coding,chr1:169631244-169823221	0.0419898	16	0.639383
ENSG00000004809.9,SLC22A16,coding,chr6:110745889-110797844	ENSG00000260188.1,CTA-331P3.1.1,lncRNA,chr6:110799109-110800639	0.556723	1	0.476331
ENSG00000004809.9,SLC22A16,coding,chr6:110745889-110797844	ENSG00000177459.6,C8orf47,coding,chr8:99076538-99105838	0.383538	2	0.476331
ENSG00000004809.9,SLC22A16,coding,chr6:110745889-110797844	ENSG00000153721.11,CNKSR3,coding,chr6:154726310-154831793	0.377027	3	0.476331
ENSG00000004809.9,SLC22A16,coding,chr6:110745889-110797844	ENSG00000007350.11,TKTL1,coding,chrX:153524023-153558713	0.318574	4	0.476331
ENSG00000004809.9,SLC22A16,coding,chr6:110745889-110797844	ENSG00000020129.10,NCDN,coding,chr1:36023073-36032875	0.288281	5	0.476331
ENSG00000004809.9,SLC22A16,coding,chr6:110745889-110797844	ENSG00000004776.5,HSPB6,coding,chr19:36245469-36247930	0.267097	6	0.476331
ENSG00000004809.9,SLC22A16,coding,chr6:110745889-110797844	ENSG00000000005.5,TNMD,coding,chrX:99839798-99854882	0.22116	7	0.476331
ENSG00000004809.9,SLC22A16,coding,chr6:110745889-110797844	ENSG00000000003.9,TSPAN6,coding,chrX:99883666-99894988	0.21873	8	0.476331
ENSG00000004809.9,SLC22A16,coding,chr6:110745889-110797844	ENSG00000000460.11,C1orf112,coding,chr1:169631244-169823221	0.176902	9	0.476331
ENSG00000004838.9,ZMYND10,coding,chr3:50378540-50384283	ENSG00000089101.11,C20orf26,coding,chr20:20033157-20341346	0.86445	1	0.945983
ENSG00000004838.9,ZMYND10,coding,chr3:50378540-50384283	ENSG00000136918.3,WDR38,coding,chr9:127615754-127620160	0.855994	2	0.945983
ENSG00000004838.9,ZMYND10,coding,chr3:50378540-50384283	ENSG00000092850.7,TEKT2,coding,chr1:36549675-36553876	0.825109	3	0.945983
ENSG00000004838.9,ZMYND10,coding,chr3:50378540-50384283	ENSG00000080572.8,CXorf41,coding,chrX:106449861-106487473	0.802101	4	0.945983
ENSG00000004838.9,ZMYND10,coding,chr3:50378540-50384283	ENSG00000007174.10,DNAH9,coding,chr17:11501747-11873485	0.79973	5	0.945983
ENSG00000004838.9,ZMYND10,coding,chr3:50378540-50384283	ENSG00000124237.5,C20orf85,coding,chr20:56725959-56736206	0.789669	6	0.945983
ENSG00000004838.9,ZMYND10,coding,chr3:50378540-50384283	ENSG00000087903.7,RFX2,coding,chr19:5993174-6110664	0.774071	7	0.945983
ENSG00000004838.9,ZMYND10,coding,chr3:50378540-50384283	ENSG00000007516.8,BAIAP3,coding,chr16:1383601-1399439	0.761262	8	0.945983
ENSG00000004838.9,ZMYND10,coding,chr3:50378540-50384283	ENSG00000034239.5,EFCAB1,coding,chr8:49623347-49647870	0.745388	9	0.945983
ENSG00000004838.9,ZMYND10,coding,chr3:50378540-50384283	ENSG00000001460.12,C1orf201,coding,chr1:24683488-24743424	0.742335	10	0.945983
ENSG00000004838.9,ZMYND10,coding,chr3:50378540-50384283	ENSG00000008226.15,DLEC1,coding,chr3:38080695-38165516	0.740964	11	0.945983
ENSG00000004838.9,ZMYND10,coding,chr3:50378540-50384283	ENSG00000039139.8,DNAH5,coding,chr5:13690439-13944652	0.686175	12	0.945983
ENSG00000004838.9,ZMYND10,coding,chr3:50378540-50384283	ENSG00000005448.12,WDR54,coding,chr2:74648804-74652882	0.675848	13	0.945983
ENSG00000004838.9,ZMYND10,coding,chr3:50378540-50384283	ENSG00000006016.5,CRLF1,coding,chr19:18704036-18717660	0.442938	14	0.945983
ENSG00000004838.9,ZMYND10,coding,chr3:50378540-50384283	ENSG00000007129.10,CEACAM21,coding,chr19:42041701-42093197	0.401744	15	0.945983
ENSG00000004838.9,ZMYND10,coding,chr3:50378540-50384283	ENSG00000003096.9,KLHL13,coding,chrX:117031775-117251303	0.372533	16	0.945983
ENSG00000004838.9,ZMYND10,coding,chr3:50378540-50384283	ENSG00000069482.6,GAL,coding,chr11:68451246-68458643	-0.308532	17	0.945983
ENSG00000004838.9,ZMYND10,coding,chr3:50378540-50384283	ENSG00000002834.11,LASP1,coding,chr17:37026255-37078023	-0.282908	18	0.945983
ENSG00000004838.9,ZMYND10,coding,chr3:50378540-50384283	ENSG00000000003.9,TSPAN6,coding,chrX:99883666-99894988	0.278656	19	0.945983
ENSG00000004838.9,ZMYND10,coding,chr3:50378540-50384283	ENSG00000000460.11,C1orf112,coding,chr1:169631244-169823221	-0.269111	20	0.945983
ENSG00000004838.9,ZMYND10,coding,chr3:50378540-50384283	ENSG00000000419.7,DPM1,coding,chr20:49551403-49575092	-0.238031	21	0.945983
ENSG00000004838.9,ZMYND10,coding,chr3:50378540-50384283	ENSG00000005108.8,THSD7A,coding,chr7:11410063-11871824	0.201997	22	0.945983
ENSG00000004838.9,ZMYND10,coding,chr3:50378540-50384283	ENSG00000001167.10,NFYA,coding,chr6:41040683-41067715	-0.193285	23	0.945983
ENSG00000004838.9,ZMYND10,coding,chr3:50378540-50384283	ENSG00000003436.10,TFPI,coding,chr2:188328956-188430487	-0.169241	24	0.945983
ENSG00000004838.9,ZMYND10,coding,chr3:50378540-50384283	ENSG00000000938.7,FGR,coding,chr1:27938574-27961788	0.166774	25	0.945983
ENSG00000004838.9,ZMYND10,coding,chr3:50378540-50384283	ENSG00000068028.13,RASSF1,coding,chr3:50367218-50378411	0.0646019	26	0.945983
ENSG00000004838.9,ZMYND10,coding,chr3:50378540-50384283	ENSG00000005302.12,MSL3,coding,chrX:11776277-11793870	-0.0584024	27	0.945983
ENSG00000004838.9,ZMYND10,coding,chr3:50378540-50384283	ENSG00000010165.13,METTL13,coding,chr1:171750787-171783163	0.0515953	28	0.945983
ENSG00000004838.9,ZMYND10,coding,chr3:50378540-50384283	ENSG00000003056.3,M6PR,coding,chr12:9092958-9102551	-0.0472681	29	0.945983
ENSG00000004838.9,ZMYND10,coding,chr3:50378540-50384283	ENSG00000164406.7,LEAP2,coding,chr5:132208013-132210738	-0.0341672	30	0.945983
ENSG00000004838.9,ZMYND10,coding,chr3:50378540-50384283	ENSG00000010818.4,HIVEP2,coding,chr6:143072603-143266338	0.0297041	31	0.945983
ENSG00000004838.9,ZMYND10,coding,chr3:50378540-50384283	ENSG00000000457.8,SCYL3,coding,chr1:169821803-169863408	0.0208868	32	0.945983
ENSG00000004838.9,ZMYND10,coding,chr3:50378540-50384283	ENSG00000001630.10,CYP51A1,coding,chr7:91741464-91772266	0.00810019	33	0.945983
ENSG00000004838.9,ZMYND10,coding,chr3:50378540-50384283	ENSG00000001461.11,NIPAL3,coding,chr1:24742283-24799466	-0.00484883	34	0.945983
ENSG00000004846.12,ABCB5,coding,chr7:20654829-20816658	ENSG00000003509.11,C2orf56,coding,chr2:37458773-37480546	0.248815	1	0.111038
ENSG00000004846.12,ABCB5,coding,chr7:20654829-20816658	ENSG00000008438.3,PGLYRP1,coding,chr19:46522414-46526556	0.230549	2	0.111038
ENSG00000004846.12,ABCB5,coding,chr7:20654829-20816658	ENSG00000000003.9,TSPAN6,coding,chrX:99883666-99894988	0.129899	3	0.111038
ENSG00000004848.6,ARX,coding,chrX:25021810-25034065	ENSG00000136352.13,NKX2-1,coding,chr14:36985601-36990354	0.344046	1	0.182902
ENSG00000004848.6,ARX,coding,chrX:25021810-25034065	ENSG00000043355.5,ZIC2,coding,chr13:100634025-100639018	0.30668	2	0.182902
ENSG00000004864.8,SLC25A13,coding,chr7:95749531-95951459	ENSG00000001629.5,ANKIB1,coding,chr7:91875547-92030698	0.69452	1	0.741383
ENSG00000004864.8,SLC25A13,coding,chr7:95749531-95951459	ENSG00000001631.9,KRIT1,coding,chr7:91828282-91875480	0.665201	2	0.741383
ENSG00000004864.8,SLC25A13,coding,chr7:95749531-95951459	ENSG00000122882.5,ECD,coding,chr10:74889912-74927853	0.577337	3	0.741383
ENSG00000004864.8,SLC25A13,coding,chr7:95749531-95951459	ENSG00000000419.7,DPM1,coding,chr20:49551403-49575092	0.56337	4	0.741383
ENSG00000004864.8,SLC25A13,coding,chr7:95749531-95951459	ENSG00000054523.11,KIF1B,coding,chr1:10270763-10441661	0.537792	5	0.741383
ENSG00000004864.8,SLC25A13,coding,chr7:95749531-95951459	ENSG00000000457.8,SCYL3,coding,chr1:169821803-169863408	0.506916	6	0.741383
ENSG00000004864.8,SLC25A13,coding,chr7:95749531-95951459	ENSG00000002822.9,MAD1L1,coding,chr7:1855382-2272878	-0.444432	7	0.741383
ENSG00000004864.8,SLC25A13,coding,chr7:95749531-95951459	ENSG00000001167.10,NFYA,coding,chr6:41040683-41067715	0.433912	8	0.741383
ENSG00000004864.8,SLC25A13,coding,chr7:95749531-95951459	ENSG00000049860.9,HEXB,coding,chr5:73935847-74018472	0.358793	9	0.741383
ENSG00000004864.8,SLC25A13,coding,chr7:95749531-95951459	ENSG00000001084.6,GCLC,coding,chr6:53362138-53481768	0.34084	10	0.741383
ENSG00000004864.8,SLC25A13,coding,chr7:95749531-95951459	ENSG00000001630.10,CYP51A1,coding,chr7:91741464-91772266	0.314929	11	0.741383
ENSG00000004864.8,SLC25A13,coding,chr7:95749531-95951459	ENSG00000236029.3,AL953854.2.1,coding,chr9:47295854-47314322	-0.249056	12	0.741383
ENSG00000004864.8,SLC25A13,coding,chr7:95749531-95951459	ENSG00000044459.9,CNTLN,coding,chr9:17134979-17503921	0.213092	13	0.741383
ENSG00000004864.8,SLC25A13,coding,chr7:95749531-95951459	ENSG00000052126.9,PLEKHA5,coding,chr12:19282647-19529334	0.202284	14	0.741383
ENSG00000004864.8,SLC25A13,coding,chr7:95749531-95951459	ENSG00000000003.9,TSPAN6,coding,chrX:99883666-99894988	0.196543	15	0.741383
ENSG00000004864.8,SLC25A13,coding,chr7:95749531-95951459	ENSG00000002016.11,RAD52,coding,chr12:1021242-1100356	0.158621	16	0.741383
ENSG00000004866.13,ST7,coding,chr7:116593291-116870157	ENSG00000001036.8,FUCA2,coding,chr6:143816613-143832827	0.433756	1	0.655227
ENSG00000004866.13,ST7,coding,chr7:116593291-116870157	ENSG00000023697.8,DERA,coding,chr12:16064105-16190220	0.424605	2	0.655227
ENSG00000004866.13,ST7,coding,chr7:116593291-116870157	ENSG00000092108.15,SCFD1,coding,chr14:31091317-31205018	0.408535	3	0.655227
ENSG00000004866.13,ST7,coding,chr7:116593291-116870157	ENSG00000077063.6,CTTNBP2,coding,chr7:117350704-117514193	0.391599	4	0.655227
ENSG00000004866.13,ST7,coding,chr7:116593291-116870157	ENSG00000003147.13,ICA1,coding,chr7:8152813-8302317	0.390822	5	0.655227
ENSG00000004866.13,ST7,coding,chr7:116593291-116870157	ENSG00000004766.11,CCDC132,coding,chr7:92861652-92988338	0.364214	6	0.655227
ENSG00000004866.13,ST7,coding,chr7:116593291-116870157	ENSG00000001626.8,CFTR,coding,chr7:117105837-117308719	0.324993	7	0.655227
ENSG00000004866.13,ST7,coding,chr7:116593291-116870157	ENSG00000001084.6,GCLC,coding,chr6:53362138-53481768	0.264084	8	0.655227
ENSG00000004866.13,ST7,coding,chr7:116593291-116870157	ENSG00000005889.10,ZFX,coding,chrX:24167289-24234372	0.2456	9	0.655227
ENSG00000004866.13,ST7,coding,chr7:116593291-116870157	ENSG00000000003.9,TSPAN6,coding,chrX:99883666-99894988	0.232872	10	0.655227
ENSG00000004866.13,ST7,coding,chr7:116593291-116870157	ENSG00000005001.3,PRSS22,coding,chr16:2902727-2908171	0.210343	11	0.655227
ENSG00000004866.13,ST7,coding,chr7:116593291-116870157	ENSG00000000457.8,SCYL3,coding,chr1:169821803-169863408	0.18757	12	0.655227
ENSG00000004866.13,ST7,coding,chr7:116593291-116870157	ENSG00000004059.5,ARF5,coding,chr7:127228398-127231759	0.166894	13	0.655227
ENSG00000004866.13,ST7,coding,chr7:116593291-116870157	ENSG00000009844.9,VTA1,coding,chr6:142468366-142542085	0.127969	14	0.655227
ENSG00000004866.13,ST7,coding,chr7:116593291-116870157	ENSG00000006074.3,CCL18,coding,chr17:34391639-34399392	0.127732	15	0.655227
ENSG00000004866.13,ST7,coding,chr7:116593291-116870157	ENSG00000242802.2,KIAA0415,coding,chr7:4815252-4833943	-0.0606097	16	0.655227
ENSG00000004897.5,CDC27,coding,chr17:45195068-45266788	ENSG00000005436.9,GCFC2,coding,chr2:75879125-75938115	0.770775	1	0.937797
ENSG00000004897.5,CDC27,coding,chr17:45195068-45266788	ENSG00000006576.11,PHTF2,coding,chr7:77428108-77586818	0.760866	2	0.937797
ENSG00000004897.5,CDC27,coding,chr17:45195068-45266788	ENSG00000005175.5,RPAP3,coding,chr12:48057069-48099844	0.74707	3	0.937797
ENSG00000004897.5,CDC27,coding,chr17:45195068-45266788	ENSG00000110172.7,CHORDC1,coding,chr11:89934327-89956532	0.715728	4	0.937797
ENSG00000004897.5,CDC27,coding,chr17:45195068-45266788	ENSG00000000419.7,DPM1,coding,chr20:49551403-49575092	0.714933	5	0.937797
ENSG00000004897.5,CDC27,coding,chr17:45195068-45266788	ENSG00000072571.13,HMMR,coding,chr5:162887174-162918947	0.709946	6	0.937797
ENSG00000004897.5,CDC27,coding,chr17:45195068-45266788	ENSG00000038210.8,PI4K2B,coding,chr4:25162262-25280714	0.704377	7	0.937797
ENSG00000004897.5,CDC27,coding,chr17:45195068-45266788	ENSG00000006114.10,SYNRG,coding,chr17:35874899-35969488	0.678211	8	0.937797
ENSG00000004897.5,CDC27,coding,chr17:45195068-45266788	ENSG00000001629.5,ANKIB1,coding,chr7:91875547-92030698	0.662343	9	0.937797
ENSG00000004897.5,CDC27,coding,chr17:45195068-45266788	ENSG00000003509.11,C2orf56,coding,chr2:37458773-37480546	0.584194	10	0.937797
ENSG00000004897.5,CDC27,coding,chr17:45195068-45266788	ENSG00000005100.7,DHX33,coding,chr17:5344231-5372236	0.513772	11	0.937797
ENSG00000004897.5,CDC27,coding,chr17:45195068-45266788	ENSG00000073969.12,NSF,coding,chr17:44668074-44834830	0.512581	12	0.937797
ENSG00000004897.5,CDC27,coding,chr17:45195068-45266788	ENSG00000006712.9,PAF1,coding,chr19:39876274-39881757	-0.482618	13	0.937797
ENSG00000004897.5,CDC27,coding,chr17:45195068-45266788	ENSG00000001561.5,ENPP4,coding,chr6:46097700-46114435	0.475243	14	0.937797
ENSG00000004897.5,CDC27,coding,chr17:45195068-45266788	ENSG00000004700.11,RECQL,coding,chr12:21621844-21654603	0.422733	15	0.937797
ENSG00000004897.5,CDC27,coding,chr17:45195068-45266788	ENSG00000002822.9,MAD1L1,coding,chr7:1855382-2272878	-0.415957	16	0.937797
ENSG00000004897.5,CDC27,coding,chr17:45195068-45266788	ENSG00000001617.7,SEMA3F,coding,chr3:50192477-50226508	-0.415712	17	0.937797
ENSG00000004897.5,CDC27,coding,chr17:45195068-45266788	ENSG00000001036.8,FUCA2,coding,chr6:143816613-143832827	0.410501	18	0.937797
ENSG00000004897.5,CDC27,coding,chr17:45195068-45266788	ENSG00000001167.10,NFYA,coding,chr6:41040683-41067715	0.369488	19	0.937797
ENSG00000004897.5,CDC27,coding,chr17:45195068-45266788	ENSG00000003436.10,TFPI,coding,chr2:188328956-188430487	0.352482	20	0.937797
ENSG00000004897.5,CDC27,coding,chr17:45195068-45266788	ENSG00000105058.6,FAM32A,coding,chr19:16296234-16302855	0.341215	21	0.937797
ENSG00000004897.5,CDC27,coding,chr17:45195068-45266788	ENSG00000002919.9,SNX11,coding,chr17:46184910-46200105	0.318486	22	0.937797
ENSG00000004897.5,CDC27,coding,chr17:45195068-45266788	ENSG00000000003.9,TSPAN6,coding,chrX:99883666-99894988	0.301677	23	0.937797
ENSG00000004897.5,CDC27,coding,chr17:45195068-45266788	ENSG00000006468.9,ETV1,coding,chr7:13930852-14031050	0.29917	24	0.937797
ENSG00000004897.5,CDC27,coding,chr17:45195068-45266788	ENSG00000000457.8,SCYL3,coding,chr1:169821803-169863408	0.287859	25	0.937797
ENSG00000004897.5,CDC27,coding,chr17:45195068-45266788	ENSG00000103415.6,HMOX2,coding,chr16:4524718-4560348	-0.249582	26	0.937797
ENSG00000004897.5,CDC27,coding,chr17:45195068-45266788	ENSG00000131061.9,ZNF341,coding,chr20:32319462-32380075	-0.240196	27	0.937797
ENSG00000004897.5,CDC27,coding,chr17:45195068-45266788	ENSG00000179300.3,ZCCHC5,coding,chrX:77911565-77914825	0.204389	28	0.937797
ENSG00000004897.5,CDC27,coding,chr17:45195068-45266788	ENSG00000005075.11,POLR2J,coding,chr7:102113564-102119354	-0.183124	29	0.937797
ENSG00000004897.5,CDC27,coding,chr17:45195068-45266788	ENSG00000175544.8,CABP4,coding,chr11:67219876-67226699	-0.163694	30	0.937797
ENSG00000004897.5,CDC27,coding,chr17:45195068-45266788	ENSG00000001630.10,CYP51A1,coding,chr7:91741464-91772266	-0.104223	31	0.937797
ENSG00000004897.5,CDC27,coding,chr17:45195068-45266788	ENSG00000067596.4,DHX8,coding,chr17:41561330-41604154	0.0971801	32	0.937797
ENSG00000004897.5,CDC27,coding,chr17:45195068-45266788	ENSG00000001460.12,C1orf201,coding,chr1:24683488-24743424	0.0850179	33	0.937797
ENSG00000004897.5,CDC27,coding,chr17:45195068-45266788	ENSG00000002933.3,TMEM176A,coding,chr7:150497490-150502208	-0.0541086	34	0.937797
ENSG00000004897.5,CDC27,coding,chr17:45195068-45266788	ENSG00000005471.11,ABCB4,coding,chr7:87031012-87109751	-0.0463222	35	0.937797
ENSG00000004897.5,CDC27,coding,chr17:45195068-45266788	ENSG00000034053.9,APBA2,coding,chr15:29129628-29410518	-0.0453423	36	0.937797
ENSG00000004897.5,CDC27,coding,chr17:45195068-45266788	ENSG00000095951.11,HIVEP1,coding,chr6:12008994-12165232	-0.0303047	37	0.937797
ENSG00000004897.5,CDC27,coding,chr17:45195068-45266788	ENSG00000233816.2,IFNA13,coding,chr9:21367370-21368075	0.0279867	38	0.937797
ENSG00000004897.5,CDC27,coding,chr17:45195068-45266788	ENSG00000003056.3,M6PR,coding,chr12:9092958-9102551	0.0240811	39	0.937797
ENSG00000004897.5,CDC27,coding,chr17:45195068-45266788	ENSG00000005884.11,ITGA3,coding,chr17:48133331-48167848	0.00727226	40	0.937797
ENSG00000004939.9,SLC4A1,coding,chr17:42325752-42345509	ENSG00000105507.1,CABP5,coding,chr19:48533210-48547304	0.411327	1	0.295152
ENSG00000004939.9,SLC4A1,coding,chr17:42325752-42345509	ENSG00000091704.4,CPA1,coding,chr7:130020179-130027955	0.362079	2	0.295152
ENSG00000004939.9,SLC4A1,coding,chr17:42325752-42345509	ENSG00000006116.3,CACNG3,coding,chr16:24266873-24374122	0.282494	3	0.295152
ENSG00000004939.9,SLC4A1,coding,chr17:42325752-42345509	ENSG00000027644.4,INSRR,coding,chr1:156809854-156828810	0.261487	4	0.295152
ENSG00000004939.9,SLC4A1,coding,chr17:42325752-42345509	ENSG00000002016.11,RAD52,coding,chr12:1021242-1100356	0.23625	5	0.295152
ENSG00000004939.9,SLC4A1,coding,chr17:42325752-42345509	ENSG00000000971.10,CFH,coding,chr1:196621007-196716634	-0.207236	6	0.295152
ENSG00000004948.8,CALCR,coding,chr7:93053798-93204042	ENSG00000127928.8,GNGT1,coding,chr7:93220884-93540577	0.382728	1	0.143626
ENSG00000004961.10,HCCS,coding,chrX:11129420-11141198	ENSG00000000419.7,DPM1,coding,chr20:49551403-49575092	0.569224	1	0.71994
ENSG00000004961.10,HCCS,coding,chrX:11129420-11141198	ENSG00000053770.7,MUDENG,coding,chr14:57735626-57756797	0.56172	2	0.71994
ENSG00000004961.10,HCCS,coding,chrX:11129420-11141198	ENSG00000004779.4,NDUFAB1,coding,chr16:23592322-23607677	0.524836	3	0.71994
ENSG00000004961.10,HCCS,coding,chrX:11129420-11141198	ENSG00000005302.12,MSL3,coding,chrX:11776277-11793870	0.494309	4	0.71994
ENSG00000004961.10,HCCS,coding,chrX:11129420-11141198	ENSG00000002549.7,LAP3,coding,chr4:17578814-17609595	0.460642	5	0.71994
ENSG00000004961.10,HCCS,coding,chrX:11129420-11141198	ENSG00000023330.9,ALAS1,coding,chr3:52232101-52248343	0.460601	6	0.71994
ENSG00000004961.10,HCCS,coding,chrX:11129420-11141198	ENSG00000007923.11,DNAJC11,coding,chr1:6694227-6761984	0.457077	7	0.71994
ENSG00000004961.10,HCCS,coding,chrX:11129420-11141198	ENSG00000005059.11,CCDC109B,coding,chr4:110481360-110609874	0.4419	8	0.71994
ENSG00000004961.10,HCCS,coding,chrX:11129420-11141198	ENSG00000131828.8,PDHA1,coding,chrX:19362010-19379823	0.400985	9	0.71994
ENSG00000004961.10,HCCS,coding,chrX:11129420-11141198	ENSG00000001561.5,ENPP4,coding,chr6:46097700-46114435	0.365917	10	0.71994
ENSG00000004961.10,HCCS,coding,chrX:11129420-11141198	ENSG00000001617.7,SEMA3F,coding,chr3:50192477-50226508	-0.322056	11	0.71994
ENSG00000004961.10,HCCS,coding,chrX:11129420-11141198	ENSG00000004455.11,AK2,coding,chr1:33473584-33546597	0.311659	12	0.71994
ENSG00000004961.10,HCCS,coding,chrX:11129420-11141198	ENSG00000134905.10,CARS2,coding,chr13:111290132-111365950	-0.236687	13	0.71994
ENSG00000004961.10,HCCS,coding,chrX:11129420-11141198	ENSG00000001630.10,CYP51A1,coding,chr7:91741464-91772266	0.222117	14	0.71994
ENSG00000004961.10,HCCS,coding,chrX:11129420-11141198	ENSG00000000003.9,TSPAN6,coding,chrX:99883666-99894988	0.211436	15	0.71994
ENSG00000004961.10,HCCS,coding,chrX:11129420-11141198	ENSG00000061337.10,LZTS1,coding,chr8:20103675-20161474	-0.155381	16	0.71994
ENSG00000004961.10,HCCS,coding,chrX:11129420-11141198	ENSG00000079215.8,SLC1A3,coding,chr5:36606456-36688436	0.0256512	17	0.71994
ENSG00000004975.6,DVL2,coding,chr17:7128659-7137868	ENSG00000215041.3,NEURL4,coding,chr17:7218950-7232638	0.539409	1	0.861583
ENSG00000004975.6,DVL2,coding,chr17:7128659-7137868	ENSG00000007168.5,PAFAH1B1,coding,chr17:2496922-2588909	0.501113	2	0.861583
ENSG00000004975.6,DVL2,coding,chr17:7128659-7137868	ENSG00000005100.7,DHX33,coding,chr17:5344231-5372236	0.473529	3	0.861583
ENSG00000004975.6,DVL2,coding,chr17:7128659-7137868	ENSG00000040633.6,PHF23,coding,chr17:7138349-7142825	0.458742	4	0.861583
ENSG00000004975.6,DVL2,coding,chr17:7128659-7137868	ENSG00000004487.10,KDM1A,coding,chr1:23345940-23410182	0.456026	5	0.861583
ENSG00000004975.6,DVL2,coding,chr17:7128659-7137868	ENSG00000007202.7,KIAA0100,coding,chr17:26941458-26972472	0.446655	6	0.861583
ENSG00000004975.6,DVL2,coding,chr17:7128659-7137868	ENSG00000000460.11,C1orf112,coding,chr1:169631244-169823221	0.424194	7	0.861583
ENSG00000004975.6,DVL2,coding,chr17:7128659-7137868	ENSG00000001630.10,CYP51A1,coding,chr7:91741464-91772266	0.418173	8	0.861583
ENSG00000004975.6,DVL2,coding,chr17:7128659-7137868	ENSG00000003056.3,M6PR,coding,chr12:9092958-9102551	0.417426	9	0.861583
ENSG00000004975.6,DVL2,coding,chr17:7128659-7137868	ENSG00000000938.7,FGR,coding,chr1:27938574-27961788	-0.33872	10	0.861583
ENSG00000004975.6,DVL2,coding,chr17:7128659-7137868	ENSG00000048649.9,RSF1,coding,chr11:77371040-77532063	0.323996	11	0.861583
ENSG00000004975.6,DVL2,coding,chr17:7128659-7137868	ENSG00000002726.14,ABP1,coding,chr7:150521714-150558592	-0.30533	12	0.861583
ENSG00000004975.6,DVL2,coding,chr17:7128659-7137868	ENSG00000001626.8,CFTR,coding,chr7:117105837-117308719	-0.27535	13	0.861583
ENSG00000004975.6,DVL2,coding,chr17:7128659-7137868	ENSG00000007402.7,CACNA2D2,coding,chr3:50400232-50541675	0.272343	14	0.861583
ENSG00000004975.6,DVL2,coding,chr17:7128659-7137868	ENSG00000001036.8,FUCA2,coding,chr6:143816613-143832827	-0.262593	15	0.861583
ENSG00000004975.6,DVL2,coding,chr17:7128659-7137868	ENSG00000025770.13,NCAPH2,coding,chr22:50946644-50963063	0.220352	16	0.861583
ENSG00000004975.6,DVL2,coding,chr17:7128659-7137868	ENSG00000004777.10,ARHGAP33,coding,chr19:36266416-36279724	0.214262	17	0.861583
ENSG00000004975.6,DVL2,coding,chr17:7128659-7137868	ENSG00000000457.8,SCYL3,coding,chr1:169821803-169863408	0.209606	18	0.861583
ENSG00000004975.6,DVL2,coding,chr17:7128659-7137868	ENSG00000025156.7,HSF2,coding,chr6:122720690-122754264	0.186084	19	0.861583
ENSG00000004975.6,DVL2,coding,chr17:7128659-7137868	ENSG00000000419.7,DPM1,coding,chr20:49551403-49575092	0.182668	20	0.861583
ENSG00000004975.6,DVL2,coding,chr17:7128659-7137868	ENSG00000049283.11,EPN3,coding,chr17:48609903-48621111	-0.145932	21	0.861583
ENSG00000004975.6,DVL2,coding,chr17:7128659-7137868	ENSG00000112511.13,PHF1,coding,chr6:33378175-33384230	0.122303	22	0.861583
ENSG00000004975.6,DVL2,coding,chr17:7128659-7137868	ENSG00000004139.8,SARM1,coding,chr17:26691377-26728046	0.113062	23	0.861583
ENSG00000004975.6,DVL2,coding,chr17:7128659-7137868	ENSG00000006634.3,DBF4,coding,chr7:87505530-87538856	0.108932	24	0.861583
ENSG00000004975.6,DVL2,coding,chr17:7128659-7137868	ENSG00000018510.7,AGPS,coding,chr2:178257371-178408564	-0.0997584	25	0.861583
ENSG00000004975.6,DVL2,coding,chr17:7128659-7137868	ENSG00000006282.12,SPATA20,coding,chr17:48620418-48633213	-0.0882702	26	0.861583
ENSG00000004975.6,DVL2,coding,chr17:7128659-7137868	ENSG00000004059.5,ARF5,coding,chr7:127228398-127231759	0.0730668	27	0.861583
ENSG00000004975.6,DVL2,coding,chr17:7128659-7137868	ENSG00000004776.5,HSPB6,coding,chr19:36245469-36247930	0.0676613	28	0.861583
ENSG00000004975.6,DVL2,coding,chr17:7128659-7137868	ENSG00000152380.5,FAM151B,coding,chr5:79783787-79838382	-0.0429429	29	0.861583
ENSG00000004975.6,DVL2,coding,chr17:7128659-7137868	ENSG00000005436.9,GCFC2,coding,chr2:75879125-75938115	-0.0335192	30	0.861583
ENSG00000004975.6,DVL2,coding,chr17:7128659-7137868	ENSG00000075151.13,EIF4G3,coding,chr1:21132971-21503377	0.00991846	31	0.861583
ENSG00000004975.6,DVL2,coding,chr17:7128659-7137868	ENSG00000047621.7,C12orf4,coding,chr12:4596893-4647674	-0.00874124	32	0.861583
ENSG00000005001.3,PRSS22,coding,chr16:2902727-2908171	ENSG00000049283.11,EPN3,coding,chr17:48609903-48621111	0.464922	1	0.739579
ENSG00000005001.3,PRSS22,coding,chr16:2902727-2908171	ENSG00000005884.11,ITGA3,coding,chr17:48133331-48167848	0.414275	2	0.739579
ENSG00000005001.3,PRSS22,coding,chr16:2902727-2908171	ENSG00000050327.8,ARHGEF5,coding,chr7:144052380-144077725	0.39538	3	0.739579
ENSG00000005001.3,PRSS22,coding,chr16:2902727-2908171	ENSG00000006327.8,TNFRSF12A,coding,chr16:3070312-3072384	0.395149	4	0.739579
ENSG00000005001.3,PRSS22,coding,chr16:2902727-2908171	ENSG00000002726.14,ABP1,coding,chr7:150521714-150558592	0.374936	5	0.739579
ENSG00000005001.3,PRSS22,coding,chr16:2902727-2908171	ENSG00000006453.9,BAIAP2L1.1,coding,chr7:97920962-98030380	0.365331	6	0.739579
ENSG00000005001.3,PRSS22,coding,chr16:2902727-2908171	ENSG00000007866.13,TEAD3,coding,chr6:35441373-35464861	0.344154	7	0.739579
ENSG00000005001.3,PRSS22,coding,chr16:2902727-2908171	ENSG00000007968.6,E2F2,coding,chr1:23832921-23857712	-0.313917	8	0.739579
ENSG00000005001.3,PRSS22,coding,chr16:2902727-2908171	ENSG00000049541.5,RFC2,coding,chr7:73645828-73668774	-0.288725	9	0.739579
ENSG00000005001.3,PRSS22,coding,chr16:2902727-2908171	ENSG00000000460.11,C1orf112,coding,chr1:169631244-169823221	-0.268928	10	0.739579
ENSG00000005001.3,PRSS22,coding,chr16:2902727-2908171	ENSG00000001626.8,CFTR,coding,chr7:117105837-117308719	0.257054	11	0.739579
ENSG00000005001.3,PRSS22,coding,chr16:2902727-2908171	ENSG00000001617.7,SEMA3F,coding,chr3:50192477-50226508	0.254989	12	0.739579
ENSG00000005001.3,PRSS22,coding,chr16:2902727-2908171	ENSG00000004866.13,ST7,coding,chr7:116593291-116870157	0.210343	13	0.739579
ENSG00000005001.3,PRSS22,coding,chr16:2902727-2908171	ENSG00000006118.10,TMEM132A,coding,chr11:60691934-60704631	0.196622	14	0.739579
ENSG00000005001.3,PRSS22,coding,chr16:2902727-2908171	ENSG00000000419.7,DPM1,coding,chr20:49551403-49575092	-0.191904	15	0.739579
ENSG00000005001.3,PRSS22,coding,chr16:2902727-2908171	ENSG00000040933.10,INPP4A,coding,chr2:99061316-99207496	-0.189133	16	0.739579
ENSG00000005001.3,PRSS22,coding,chr16:2902727-2908171	ENSG00000099995.12,SF3A1,coding,chr22:30727978-30752936	-0.184196	17	0.739579
ENSG00000005001.3,PRSS22,coding,chr16:2902727-2908171	ENSG00000006530.10,AGK,coding,chr7:141250988-141355044	-0.165012	18	0.739579
ENSG00000005001.3,PRSS22,coding,chr16:2902727-2908171	ENSG00000064195.7,DLX3,coding,chr17:48067368-48072588	0.111457	19	0.739579
ENSG00000005001.3,PRSS22,coding,chr16:2902727-2908171	ENSG00000069509.5,FUNDC1,coding,chrX:44382884-44402247	-0.0969341	20	0.739579
ENSG00000005001.3,PRSS22,coding,chr16:2902727-2908171	ENSG00000007080.5,CCDC124,coding,chr19:18043823-18054793	0.0231593	21	0.739579
ENSG00000005001.3,PRSS22,coding,chr16:2902727-2908171	ENSG00000010539.6,ZNF200,coding,chr16:3272324-3285456	-0.01774	22	0.739579
ENSG00000005007.7,UPF1,coding,chr19:18942743-18979038	ENSG00000105656.4,ELL,coding,chr19:18553474-18632937	0.619595	1	0.746995
ENSG00000005007.7,UPF1,coding,chr19:18942743-18979038	ENSG00000178093.8,TSSK6,coding,chr19:19623229-19626838	0.551934	2	0.746995
ENSG00000005007.7,UPF1,coding,chr19:18942743-18979038	ENSG00000011451.8,WIZ,coding,chr19:15532318-15560762	0.525541	3	0.746995
ENSG00000005007.7,UPF1,coding,chr19:18942743-18979038	ENSG00000105671.6,DDX49,coding,chr19:19030483-19039442	0.492293	4	0.746995
ENSG00000005007.7,UPF1,coding,chr19:18942743-18979038	ENSG00000064547.8,LPAR2,coding,chr19:19734467-19739739	0.463049	5	0.746995
ENSG00000005007.7,UPF1,coding,chr19:18942743-18979038	ENSG00000006607.8,FARP2,coding,chr2:242295657-242434256	0.410867	6	0.746995
ENSG00000005007.7,UPF1,coding,chr19:18942743-18979038	ENSG00000177225.11,PDDC1,coding,chr11:767219-777501	0.328525	7	0.746995
ENSG00000005007.7,UPF1,coding,chr19:18942743-18979038	ENSG00000011275.13,RNF216,coding,chr7:5659677-5821370	0.321772	8	0.746995
ENSG00000005007.7,UPF1,coding,chr19:18942743-18979038	ENSG00000001167.10,NFYA,coding,chr6:41040683-41067715	0.277646	9	0.746995
ENSG00000005007.7,UPF1,coding,chr19:18942743-18979038	ENSG00000001630.10,CYP51A1,coding,chr7:91741464-91772266	0.266901	10	0.746995
ENSG00000005007.7,UPF1,coding,chr19:18942743-18979038	ENSG00000007080.5,CCDC124,coding,chr19:18043823-18054793	0.262272	11	0.746995
ENSG00000005007.7,UPF1,coding,chr19:18942743-18979038	ENSG00000008324.6,SS18L2,coding,chr3:42623331-42636606	-0.240628	12	0.746995
ENSG00000005007.7,UPF1,coding,chr19:18942743-18979038	ENSG00000001036.8,FUCA2,coding,chr6:143816613-143832827	-0.216157	13	0.746995
ENSG00000005007.7,UPF1,coding,chr19:18942743-18979038	ENSG00000001497.12,LAS1L,coding,chrX:64732461-64754655	0.21143	14	0.746995
ENSG00000005007.7,UPF1,coding,chr19:18942743-18979038	ENSG00000006015.12,C19orf60,coding,chr19:18699494-18703146	0.205125	15	0.746995
ENSG00000005007.7,UPF1,coding,chr19:18942743-18979038	ENSG00000008405.6,CRY1,coding,chr12:107385141-107487607	0.194376	16	0.746995
ENSG00000005007.7,UPF1,coding,chr19:18942743-18979038	ENSG00000001629.5,ANKIB1,coding,chr7:91875547-92030698	0.179015	17	0.746995
ENSG00000005007.7,UPF1,coding,chr19:18942743-18979038	ENSG00000009780.10,FAM76A,coding,chr1:28052489-28088475	0.172681	18	0.746995
ENSG00000005007.7,UPF1,coding,chr19:18942743-18979038	ENSG00000001460.12,C1orf201,coding,chr1:24683488-24743424	0.146278	19	0.746995
ENSG00000005020.7,SKAP2,coding,chr7:26706680-27034858	ENSG00000105991.7,HOXA1,coding,chr7:27132611-27135615	0.661118	1	0.762768
ENSG00000005020.7,SKAP2,coding,chr7:26706680-27034858	ENSG00000105996.5,HOXA2,coding,chr7:27139720-27142430	0.549678	2	0.762768
ENSG00000005020.7,SKAP2,coding,chr7:26706680-27034858	ENSG00000025800.8,KPNA6,coding,chr1:32573638-32642169	0.499622	3	0.762768
ENSG00000005020.7,SKAP2,coding,chr7:26706680-27034858	ENSG00000000419.7,DPM1,coding,chr20:49551403-49575092	0.412151	4	0.762768
ENSG00000005020.7,SKAP2,coding,chr7:26706680-27034858	ENSG00000004700.11,RECQL,coding,chr12:21621844-21654603	0.397637	5	0.762768
ENSG00000005020.7,SKAP2,coding,chr7:26706680-27034858	ENSG00000008282.3,SYPL1,coding,chr7:105730948-105753022	0.395585	6	0.762768
ENSG00000005020.7,SKAP2,coding,chr7:26706680-27034858	ENSG00000004961.10,HCCS,coding,chrX:11129420-11141198	0.342385	7	0.762768
ENSG00000005020.7,SKAP2,coding,chr7:26706680-27034858	ENSG00000078399.10,HOXA9,coding,chr7:27202056-27209269	0.341299	8	0.762768
ENSG00000005020.7,SKAP2,coding,chr7:26706680-27034858	ENSG00000003436.10,TFPI,coding,chr2:188328956-188430487	0.322633	9	0.762768
ENSG00000005020.7,SKAP2,coding,chr7:26706680-27034858	ENSG00000002834.11,LASP1,coding,chr17:37026255-37078023	0.317524	10	0.762768
ENSG00000005020.7,SKAP2,coding,chr7:26706680-27034858	ENSG00000006047.7,YBX2,coding,chr17:7191570-7197876	0.300436	11	0.762768
ENSG00000005020.7,SKAP2,coding,chr7:26706680-27034858	ENSG00000078246.10,TULP3,coding,chr12:2986388-3050306	-0.264611	12	0.762768
ENSG00000005020.7,SKAP2,coding,chr7:26706680-27034858	ENSG00000001461.11,NIPAL3,coding,chr1:24742283-24799466	0.250062	13	0.762768
ENSG00000005020.7,SKAP2,coding,chr7:26706680-27034858	ENSG00000003400.10,CASP10,coding,chr2:202047603-202094129	0.247751	14	0.762768
ENSG00000005020.7,SKAP2,coding,chr7:26706680-27034858	ENSG00000026559.8,KCNG1,coding,chr20:49620192-49639666	-0.157535	15	0.762768
ENSG00000005020.7,SKAP2,coding,chr7:26706680-27034858	ENSG00000125355.11,FAM70A,coding,chrX:119392504-119445411	0.134108	16	0.762768
ENSG00000005020.7,SKAP2,coding,chr7:26706680-27034858	ENSG00000001084.6,GCLC,coding,chr6:53362138-53481768	-0.100765	17	0.762768
ENSG00000005020.7,SKAP2,coding,chr7:26706680-27034858	ENSG00000010810.11,FYN,coding,chr6:111981534-112194655	-0.0595612	18	0.762768
ENSG00000005020.7,SKAP2,coding,chr7:26706680-27034858	ENSG00000011523.8,CEP68,coding,chr2:65283499-65314138	-0.0499976	19	0.762768
ENSG00000005020.7,SKAP2,coding,chr7:26706680-27034858	ENSG00000158292.6,GPR153,coding,chr1:6307405-6321035	0.0322801	20	0.762768
ENSG00000005022.5,SLC25A5,coding,chrX:118602362-118605282	ENSG00000123416.9,TUBA1B,coding,chr12:49521564-49525180	0.800789	1	0.897942
ENSG00000005022.5,SLC25A5,coding,chrX:118602362-118605282	ENSG00000003056.3,M6PR,coding,chr12:9092958-9102551	0.695026	2	0.897942
ENSG00000005022.5,SLC25A5,coding,chrX:118602362-118605282	ENSG00000001630.10,CYP51A1,coding,chr7:91741464-91772266	0.630505	3	0.897942
ENSG00000005022.5,SLC25A5,coding,chrX:118602362-118605282	ENSG00000011376.5,LARS2,coding,chr3:45429997-45590913	0.628315	4	0.897942
ENSG00000005022.5,SLC25A5,coding,chrX:118602362-118605282	ENSG00000007392.12,LUC7L,coding,chr16:238967-279462	-0.625028	5	0.897942
ENSG00000005022.5,SLC25A5,coding,chrX:118602362-118605282	ENSG00000088256.3,GNA11,coding,chr19:3094407-3121452	0.584619	6	0.897942
ENSG00000005022.5,SLC25A5,coding,chrX:118602362-118605282	ENSG00000002549.7,LAP3,coding,chr4:17578814-17609595	0.486117	7	0.897942
ENSG00000005022.5,SLC25A5,coding,chrX:118602362-118605282	ENSG00000003756.11,RBM5,coding,chr3:50126340-50156454	-0.462447	8	0.897942
ENSG00000005022.5,SLC25A5,coding,chrX:118602362-118605282	ENSG00000072849.5,DERL2,coding,chr17:5374570-5389537	-0.402797	9	0.897942
ENSG00000005022.5,SLC25A5,coding,chrX:118602362-118605282	ENSG00000063601.12,MTMR1,coding,chrX:149861434-149933576	0.362271	10	0.897942
ENSG00000005022.5,SLC25A5,coding,chrX:118602362-118605282	ENSG00000000460.11,C1orf112,coding,chr1:169631244-169823221	0.348844	11	0.897942
ENSG00000005022.5,SLC25A5,coding,chrX:118602362-118605282	ENSG00000004779.4,NDUFAB1,coding,chr16:23592322-23607677	0.340025	12	0.897942
ENSG00000005022.5,SLC25A5,coding,chrX:118602362-118605282	ENSG00000080845.12,DLGAP4,coding,chr20:34894257-35157040	-0.319828	13	0.897942
ENSG00000005022.5,SLC25A5,coding,chrX:118602362-118605282	ENSG00000018610.8,CXorf56,coding,chrX:118672111-118699397	0.317978	14	0.897942
ENSG00000005022.5,SLC25A5,coding,chrX:118602362-118605282	ENSG00000002016.11,RAD52,coding,chr12:1021242-1100356	-0.317906	15	0.897942
ENSG00000005022.5,SLC25A5,coding,chrX:118602362-118605282	ENSG00000085377.8,PREP,coding,chr6:105725439-105850959	0.258846	16	0.897942
ENSG00000005022.5,SLC25A5,coding,chrX:118602362-118605282	ENSG00000064999.11,ANKS1A,coding,chr6:34857037-35085317	0.255375	17	0.897942
ENSG00000005022.5,SLC25A5,coding,chrX:118602362-118605282	ENSG00000004776.5,HSPB6,coding,chr19:36245469-36247930	-0.251643	18	0.897942
ENSG00000005022.5,SLC25A5,coding,chrX:118602362-118605282	ENSG00000062524.10,LTK,coding,chr15:41795782-41806085	-0.248084	19	0.897942
ENSG00000005022.5,SLC25A5,coding,chrX:118602362-118605282	ENSG00000001460.12,C1orf201,coding,chr1:24683488-24743424	-0.247465	20	0.897942
ENSG00000005022.5,SLC25A5,coding,chrX:118602362-118605282	ENSG00000000419.7,DPM1,coding,chr20:49551403-49575092	0.246166	21	0.897942
ENSG00000005022.5,SLC25A5,coding,chrX:118602362-118605282	ENSG00000083845.3,RPS5,coding,chr19:58898635-58906170	0.24518	22	0.897942
ENSG00000005022.5,SLC25A5,coding,chrX:118602362-118605282	ENSG00000002822.9,MAD1L1,coding,chr7:1855382-2272878	-0.186524	23	0.897942
ENSG00000005022.5,SLC25A5,coding,chrX:118602362-118605282	ENSG00000001497.12,LAS1L,coding,chrX:64732461-64754655	0.143743	24	0.897942
ENSG00000005022.5,SLC25A5,coding,chrX:118602362-118605282	ENSG00000001036.8,FUCA2,coding,chr6:143816613-143832827	-0.12987	25	0.897942
ENSG00000005022.5,SLC25A5,coding,chrX:118602362-118605282	ENSG00000001461.11,NIPAL3,coding,chr1:24742283-24799466	0.103406	26	0.897942
ENSG00000005022.5,SLC25A5,coding,chrX:118602362-118605282	ENSG00000001631.9,KRIT1,coding,chr7:91828282-91875480	-0.0823608	27	0.897942
ENSG00000005022.5,SLC25A5,coding,chrX:118602362-118605282	ENSG00000036054.8,TBC1D23,coding,chr3:99979843-100044095	-0.079798	28	0.897942
ENSG00000005022.5,SLC25A5,coding,chrX:118602362-118605282	ENSG00000006114.10,SYNRG,coding,chr17:35874899-35969488	-0.0428146	29	0.897942
ENSG00000005059.11,CCDC109B,coding,chr4:110481360-110609874	ENSG00000010030.9,ETV7,coding,chr6:36322418-36356164	0.514069	1	0.794344
ENSG00000005059.11,CCDC109B,coding,chr4:110481360-110609874	ENSG00000004961.10,HCCS,coding,chrX:11129420-11141198	0.4419	2	0.794344
ENSG00000005059.11,CCDC109B,coding,chr4:110481360-110609874	ENSG00000004468.6,CD38,coding,chr4:15779897-15851069	0.380403	3	0.794344
ENSG00000005059.11,CCDC109B,coding,chr4:110481360-110609874	ENSG00000007541.10,PIGQ,coding,chr16:616994-634136	-0.371885	4	0.794344
ENSG00000005059.11,CCDC109B,coding,chr4:110481360-110609874	ENSG00000000419.7,DPM1,coding,chr20:49551403-49575092	0.363331	5	0.794344
ENSG00000005059.11,CCDC109B,coding,chr4:110481360-110609874	ENSG00000005812.6,FBXL3,coding,chr13:77566739-77601330	0.351141	6	0.794344
ENSG00000005059.11,CCDC109B,coding,chr4:110481360-110609874	ENSG00000012048.13,BRCA1,coding,chr17:41196311-41322290	0.313928	7	0.794344
ENSG00000005059.11,CCDC109B,coding,chr4:110481360-110609874	ENSG00000007372.14,PAX6,coding,chr11:31806339-31839509	0.29193	8	0.794344
ENSG00000005059.11,CCDC109B,coding,chr4:110481360-110609874	ENSG00000018408.10,WWTR1,coding,chr3:149235021-149454501	0.266514	9	0.794344
ENSG00000005059.11,CCDC109B,coding,chr4:110481360-110609874	ENSG00000123739.6,PLA2G12A,coding,chr4:110631144-110651233	0.264924	10	0.794344
ENSG00000005059.11,CCDC109B,coding,chr4:110481360-110609874	ENSG00000002745.7,WNT16,coding,chr7:120965420-120981158	-0.263378	11	0.794344
ENSG00000005059.11,CCDC109B,coding,chr4:110481360-110609874	ENSG00000092820.13,EZR,coding,chr6:159186772-159240444	0.223779	12	0.794344
ENSG00000005059.11,CCDC109B,coding,chr4:110481360-110609874	ENSG00000130816.8,DNMT1,coding,chr19:10244022-10305755	0.208657	13	0.794344
ENSG00000005059.11,CCDC109B,coding,chr4:110481360-110609874	ENSG00000005187.7,ACSM3,coding,chr16:20621564-20808903	-0.202293	14	0.794344
ENSG00000005059.11,CCDC109B,coding,chr4:110481360-110609874	ENSG00000103855.12,CD276,coding,chr15:73976306-74006859	-0.195602	15	0.794344
ENSG00000005059.11,CCDC109B,coding,chr4:110481360-110609874	ENSG00000065357.14,DGKA,coding,chr12:56321102-56347811	0.194661	16	0.794344
ENSG00000005059.11,CCDC109B,coding,chr4:110481360-110609874	ENSG00000000938.7,FGR,coding,chr1:27938574-27961788	0.182057	17	0.794344
ENSG00000005059.11,CCDC109B,coding,chr4:110481360-110609874	ENSG00000005100.7,DHX33,coding,chr17:5344231-5372236	0.15627	18	0.794344
ENSG00000005059.11,CCDC109B,coding,chr4:110481360-110609874	ENSG00000124782.14,RREB1,coding,chr6:7107829-7252213	-0.138333	19	0.794344
ENSG00000005059.11,CCDC109B,coding,chr4:110481360-110609874	ENSG00000002016.11,RAD52,coding,chr12:1021242-1100356	-0.136062	20	0.794344
ENSG00000005059.11,CCDC109B,coding,chr4:110481360-110609874	ENSG00000100097.7,LGALS1,coding,chr22:38071614-38075813	0.104847	21	0.794344
ENSG00000005059.11,CCDC109B,coding,chr4:110481360-110609874	ENSG00000005156.5,LIG3,coding,chr17:33307541-33332083	-0.0753585	22	0.794344
ENSG00000005059.11,CCDC109B,coding,chr4:110481360-110609874	ENSG00000109101.2,FOXN1,coding,chr17:26850958-26865914	-0.069515	23	0.794344
ENSG00000005059.11,CCDC109B,coding,chr4:110481360-110609874	ENSG00000074855.5,ANO8,coding,chr19:17434031-17445638	-0.0594598	24	0.794344
ENSG00000005059.11,CCDC109B,coding,chr4:110481360-110609874	ENSG00000005075.11,POLR2J,coding,chr7:102113564-102119354	0.00786373	25	0.794344
ENSG00000005073.5,HOXA11,coding,chr7:27221128-27224842	ENSG00000240990.4,HOXA11-AS1,lncRNA,chr7:27224136-27228912	0.904229	1	0.91972
ENSG00000005073.5,HOXA11,coding,chr7:27221128-27224842	ENSG00000253293.2,HOXA10,coding,chr7:27210209-27219880	0.791435	2	0.91972
ENSG00000005073.5,HOXA11,coding,chr7:27221128-27224842	ENSG00000011465.12,DCN,coding,chr12:91539024-91576900	0.553684	3	0.91972
ENSG00000005073.5,HOXA11,coding,chr7:27221128-27224842	ENSG00000183770.4,FOXL2,coding,chr3:138663065-138665982	0.52194	4	0.91972
ENSG00000005073.5,HOXA11,coding,chr7:27221128-27224842	ENSG00000079931.10,MOXD1,coding,chr6:132617193-132722684	0.503188	5	0.91972
ENSG00000005073.5,HOXA11,coding,chr7:27221128-27224842	ENSG00000078399.10,HOXA9,coding,chr7:27202056-27209269	0.499099	6	0.91972
ENSG00000005073.5,HOXA11,coding,chr7:27221128-27224842	ENSG00000010295.13,IFFO1,coding,chr12:6647540-6665239	0.354355	7	0.91972
ENSG00000005073.5,HOXA11,coding,chr7:27221128-27224842	ENSG00000106031.5,HOXA13,coding,chr7:27233121-27239725	0.34308	8	0.91972
ENSG00000005073.5,HOXA11,coding,chr7:27221128-27224842	ENSG00000003436.10,TFPI,coding,chr2:188328956-188430487	0.326246	9	0.91972
ENSG00000005073.5,HOXA11,coding,chr7:27221128-27224842	ENSG00000003147.13,ICA1,coding,chr7:8152813-8302317	0.322644	10	0.91972
ENSG00000005073.5,HOXA11,coding,chr7:27221128-27224842	ENSG00000006283.12,CACNA1G,coding,chr17:48638428-48704835	0.27411	11	0.91972
ENSG00000005073.5,HOXA11,coding,chr7:27221128-27224842	ENSG00000002587.5,HS3ST1,coding,chr4:11394773-11431389	0.25644	12	0.91972
ENSG00000005073.5,HOXA11,coding,chr7:27221128-27224842	ENSG00000005243.4,COPZ2,coding,chr17:46103534-46115139	0.253418	13	0.91972
ENSG00000005073.5,HOXA11,coding,chr7:27221128-27224842	ENSG00000004059.5,ARF5,coding,chr7:127228398-127231759	0.215893	14	0.91972
ENSG00000005073.5,HOXA11,coding,chr7:27221128-27224842	ENSG00000011198.3,ABHD5,coding,chr3:43731604-43775863	0.193072	15	0.91972
ENSG00000005073.5,HOXA11,coding,chr7:27221128-27224842	ENSG00000006125.11,AP2B1,coding,chr17:33914281-34053434	0.189072	16	0.91972
ENSG00000005073.5,HOXA11,coding,chr7:27221128-27224842	ENSG00000065883.10,CDK13,coding,chr7:39989635-40136733	-0.176481	17	0.91972
ENSG00000005073.5,HOXA11,coding,chr7:27221128-27224842	ENSG00000165810.11,BTNL9,coding,chr5:180467224-180488523	-0.162297	18	0.91972
ENSG00000005073.5,HOXA11,coding,chr7:27221128-27224842	ENSG00000164363.8,SLC6A18,coding,chr5:1225469-1246304	0.149446	19	0.91972
ENSG00000005073.5,HOXA11,coding,chr7:27221128-27224842	ENSG00000102891.3,MT4,coding,chr16:56598960-56602869	-0.0299025	20	0.91972
ENSG00000005075.11,POLR2J,coding,chr7:102113564-102119354	ENSG00000106400.7,ZNHIT1,coding,chr7:100860948-100867471	0.767377	1	0.914295
ENSG00000005075.11,POLR2J,coding,chr7:102113564-102119354	ENSG00000003056.3,M6PR,coding,chr12:9092958-9102551	-0.691568	2	0.914295
ENSG00000005075.11,POLR2J,coding,chr7:102113564-102119354	ENSG00000106246.9,PTCD1,coding,chr7:99014361-99063820	0.640001	3	0.914295
ENSG00000005075.11,POLR2J,coding,chr7:102113564-102119354	ENSG00000071462.7,WBSCR22,coding,chr7:73097354-73119491	0.604457	4	0.914295
ENSG00000005075.11,POLR2J,coding,chr7:102113564-102119354	ENSG00000004059.5,ARF5,coding,chr7:127228398-127231759	0.592002	5	0.914295
ENSG00000005075.11,POLR2J,coding,chr7:102113564-102119354	ENSG00000002330.8,BAD,coding,chr11:64037301-64052176	0.565938	6	0.914295
ENSG00000005075.11,POLR2J,coding,chr7:102113564-102119354	ENSG00000160993.3,ALKBH4,coding,chr7:102096684-102105323	0.557735	7	0.914295
ENSG00000005075.11,POLR2J,coding,chr7:102113564-102119354	ENSG00000030066.8,NUP160,coding,chr11:47799638-47870107	-0.539202	8	0.914295
ENSG00000005075.11,POLR2J,coding,chr7:102113564-102119354	ENSG00000007080.5,CCDC124,coding,chr19:18043823-18054793	0.538824	9	0.914295
ENSG00000005075.11,POLR2J,coding,chr7:102113564-102119354	ENSG00000001630.10,CYP51A1,coding,chr7:91741464-91772266	-0.529414	10	0.914295
ENSG00000005075.11,POLR2J,coding,chr7:102113564-102119354	ENSG00000005022.5,SLC25A5,coding,chrX:118602362-118605282	-0.523886	11	0.914295
ENSG00000005075.11,POLR2J,coding,chr7:102113564-102119354	ENSG00000033011.5,ALG1,coding,chr16:5083702-5135395	-0.491415	12	0.914295
ENSG00000005075.11,POLR2J,coding,chr7:102113564-102119354	ENSG00000002549.7,LAP3,coding,chr4:17578814-17609595	-0.49095	13	0.914295
ENSG00000005075.11,POLR2J,coding,chr7:102113564-102119354	ENSG00000005812.6,FBXL3,coding,chr13:77566739-77601330	-0.487708	14	0.914295
ENSG00000005075.11,POLR2J,coding,chr7:102113564-102119354	ENSG00000130701.3,C20orf151,coding,chr20:60985292-61002589	0.483681	15	0.914295
ENSG00000005075.11,POLR2J,coding,chr7:102113564-102119354	ENSG00000178127.7,NDUFV2,coding,chr18:9102627-9134343	0.427874	16	0.914295
ENSG00000005075.11,POLR2J,coding,chr7:102113564-102119354	ENSG00000114796.10,KLHL24,coding,chr3:183353355-183398733	-0.422732	17	0.914295
ENSG00000005075.11,POLR2J,coding,chr7:102113564-102119354	ENSG00000003393.10,ALS2,coding,chr2:202565276-202645912	-0.381349	18	0.914295
ENSG00000005075.11,POLR2J,coding,chr7:102113564-102119354	ENSG00000001167.10,NFYA,coding,chr6:41040683-41067715	-0.354224	19	0.914295
ENSG00000005075.11,POLR2J,coding,chr7:102113564-102119354	ENSG00000002834.11,LASP1,coding,chr17:37026255-37078023	-0.333179	20	0.914295
ENSG00000005075.11,POLR2J,coding,chr7:102113564-102119354	ENSG00000001461.11,NIPAL3,coding,chr1:24742283-24799466	-0.327604	21	0.914295
ENSG00000005075.11,POLR2J,coding,chr7:102113564-102119354	ENSG00000074071.8,MRPS34,coding,chr16:1821890-1823156	0.319539	22	0.914295
ENSG00000005075.11,POLR2J,coding,chr7:102113564-102119354	ENSG00000000457.8,SCYL3,coding,chr1:169821803-169863408	-0.306757	23	0.914295
ENSG00000005075.11,POLR2J,coding,chr7:102113564-102119354	ENSG00000004487.10,KDM1A,coding,chr1:23345940-23410182	-0.305773	24	0.914295
ENSG00000005075.11,POLR2J,coding,chr7:102113564-102119354	ENSG00000000419.7,DPM1,coding,chr20:49551403-49575092	-0.24136	25	0.914295
ENSG00000005075.11,POLR2J,coding,chr7:102113564-102119354	ENSG00000001497.12,LAS1L,coding,chrX:64732461-64754655	0.206865	26	0.914295
ENSG00000005075.11,POLR2J,coding,chr7:102113564-102119354	ENSG00000001036.8,FUCA2,coding,chr6:143816613-143832827	0.122108	27	0.914295
ENSG00000005075.11,POLR2J,coding,chr7:102113564-102119354	ENSG00000001631.9,KRIT1,coding,chr7:91828282-91875480	-0.102152	28	0.914295
ENSG00000005075.11,POLR2J,coding,chr7:102113564-102119354	ENSG00000006652.8,IFRD1,coding,chr7:112063022-112121072	0.0830367	29	0.914295
ENSG00000005075.11,POLR2J,coding,chr7:102113564-102119354	ENSG00000111328.2,CDK2AP1,coding,chr12:123745527-123756881	0.0366742	30	0.914295
ENSG00000005075.11,POLR2J,coding,chr7:102113564-102119354	ENSG00000003436.10,TFPI,coding,chr2:188328956-188430487	-0.00515426	31	0.914295
ENSG00000005100.7,DHX33,coding,chr17:5344231-5372236	ENSG00000048991.11,R3HDM1,coding,chr2:136289024-136482840	0.653869	1	0.851327
ENSG00000005100.7,DHX33,coding,chr17:5344231-5372236	ENSG00000108559.5,NUP88,coding,chr17:5289345-5323000	0.644922	2	0.851327
ENSG00000005100.7,DHX33,coding,chr17:5344231-5372236	ENSG00000029725.10,RABEP1,coding,chr17:5185557-5289129	0.60716	3	0.851327
ENSG00000005100.7,DHX33,coding,chr17:5344231-5372236	ENSG00000000460.11,C1orf112,coding,chr1:169631244-169823221	0.566156	4	0.851327
ENSG00000005100.7,DHX33,coding,chr17:5344231-5372236	ENSG00000001629.5,ANKIB1,coding,chr7:91875547-92030698	0.529579	5	0.851327
ENSG00000005100.7,DHX33,coding,chr17:5344231-5372236	ENSG00000001167.10,NFYA,coding,chr6:41040683-41067715	0.524489	6	0.851327
ENSG00000005100.7,DHX33,coding,chr17:5344231-5372236	ENSG00000101361.9,NOP56,coding,chr20:2632790-2639039	0.516892	7	0.851327
ENSG00000005100.7,DHX33,coding,chr17:5344231-5372236	ENSG00000004897.5,CDC27,coding,chr17:45195068-45266788	0.513772	8	0.851327
ENSG00000005100.7,DHX33,coding,chr17:5344231-5372236	ENSG00000006695.5,COX10,coding,chr17:13972845-14111994	0.480237	9	0.851327
ENSG00000005100.7,DHX33,coding,chr17:5344231-5372236	ENSG00000004975.6,DVL2,coding,chr17:7128659-7137868	0.473529	10	0.851327
ENSG00000005100.7,DHX33,coding,chr17:5344231-5372236	ENSG00000008083.8,JARID2,coding,chr6:15245733-15522252	0.465102	11	0.851327
ENSG00000005100.7,DHX33,coding,chr17:5344231-5372236	ENSG00000074201.3,CLNS1A,coding,chr11:77225980-77348850	0.463481	12	0.851327
ENSG00000005100.7,DHX33,coding,chr17:5344231-5372236	ENSG00000002016.11,RAD52,coding,chr12:1021242-1100356	0.430235	13	0.851327
ENSG00000005100.7,DHX33,coding,chr17:5344231-5372236	ENSG00000013523.5,ANGEL1,coding,chr14:77253587-77292589	0.396779	14	0.851327
ENSG00000005100.7,DHX33,coding,chr17:5344231-5372236	ENSG00000000419.7,DPM1,coding,chr20:49551403-49575092	0.386538	15	0.851327
ENSG00000005100.7,DHX33,coding,chr17:5344231-5372236	ENSG00000006007.7,GDE1,coding,chr16:19513014-19533467	0.345702	16	0.851327
ENSG00000005100.7,DHX33,coding,chr17:5344231-5372236	ENSG00000001084.6,GCLC,coding,chr6:53362138-53481768	0.344705	17	0.851327
ENSG00000005100.7,DHX33,coding,chr17:5344231-5372236	ENSG00000000457.8,SCYL3,coding,chr1:169821803-169863408	0.339722	18	0.851327
ENSG00000005100.7,DHX33,coding,chr17:5344231-5372236	ENSG00000102241.6,HTATSF1,coding,chrX:135579237-135594505	0.317967	19	0.851327
ENSG00000005100.7,DHX33,coding,chr17:5344231-5372236	ENSG00000006744.10,ELAC2,coding,chr17:12894929-12921381	0.293291	20	0.851327
ENSG00000005100.7,DHX33,coding,chr17:5344231-5372236	ENSG00000002726.14,ABP1,coding,chr7:150521714-150558592	-0.264014	21	0.851327
ENSG00000005100.7,DHX33,coding,chr17:5344231-5372236	ENSG00000105516.5,DBP,coding,chr19:49133819-49140639	-0.258791	22	0.851327
ENSG00000005100.7,DHX33,coding,chr17:5344231-5372236	ENSG00000007384.9,RHBDF1,coding,chr16:108057-126354	-0.164229	23	0.851327
ENSG00000005100.7,DHX33,coding,chr17:5344231-5372236	ENSG00000001497.12,LAS1L,coding,chrX:64732461-64754655	0.131033	24	0.851327
ENSG00000005100.7,DHX33,coding,chr17:5344231-5372236	ENSG00000004660.9,CAMKK1,coding,chr17:3763608-3796338	0.0843378	25	0.851327
ENSG00000005100.7,DHX33,coding,chr17:5344231-5372236	ENSG00000049246.8,PER3,coding,chr1:7844379-7905237	0.0335708	26	0.851327
ENSG00000005102.8,MEOX1,coding,chr17:41717755-41739322	ENSG00000196154.6,S100A4,coding,chr1:153516088-153522612	0.465836	1	0.572812
ENSG00000005102.8,MEOX1,coding,chr17:41717755-41739322	ENSG00000002587.5,HS3ST1,coding,chr4:11394773-11431389	-0.420078	2	0.572812
ENSG00000005102.8,MEOX1,coding,chr17:41717755-41739322	ENSG00000017797.6,RALBP1,coding,chr18:9475006-9538112	0.282764	3	0.572812
ENSG00000005102.8,MEOX1,coding,chr17:41717755-41739322	ENSG00000000457.8,SCYL3,coding,chr1:169821803-169863408	-0.266503	4	0.572812
ENSG00000005102.8,MEOX1,coding,chr17:41717755-41739322	ENSG00000001084.6,GCLC,coding,chr6:53362138-53481768	-0.249009	5	0.572812
ENSG00000005102.8,MEOX1,coding,chr17:41717755-41739322	ENSG00000026508.11,CD44,coding,chr11:35160416-35253949	-0.231431	6	0.572812
ENSG00000005102.8,MEOX1,coding,chr17:41717755-41739322	ENSG00000000005.5,TNMD,coding,chrX:99839798-99854882	0.220618	7	0.572812
ENSG00000005102.8,MEOX1,coding,chr17:41717755-41739322	ENSG00000011465.12,DCN,coding,chr12:91539024-91576900	0.212103	8	0.572812
ENSG00000005102.8,MEOX1,coding,chr17:41717755-41739322	ENSG00000000419.7,DPM1,coding,chr20:49551403-49575092	0.199797	9	0.572812
ENSG00000005102.8,MEOX1,coding,chr17:41717755-41739322	ENSG00000001617.7,SEMA3F,coding,chr3:50192477-50226508	0.182851	10	0.572812
ENSG00000005102.8,MEOX1,coding,chr17:41717755-41739322	ENSG00000001036.8,FUCA2,coding,chr6:143816613-143832827	-0.152979	11	0.572812
ENSG00000005102.8,MEOX1,coding,chr17:41717755-41739322	ENSG00000000003.9,TSPAN6,coding,chrX:99883666-99894988	0.151135	12	0.572812
ENSG00000005102.8,MEOX1,coding,chr17:41717755-41739322	ENSG00000000938.7,FGR,coding,chr1:27938574-27961788	0.118214	13	0.572812
ENSG00000005102.8,MEOX1,coding,chr17:41717755-41739322	ENSG00000000460.11,C1orf112,coding,chr1:169631244-169823221	0.0831364	14	0.572812
ENSG00000005102.8,MEOX1,coding,chr17:41717755-41739322	ENSG00000005448.12,WDR54,coding,chr2:74648804-74652882	-0.052298	15	0.572812
ENSG00000005108.8,THSD7A,coding,chr7:11410063-11871824	ENSG00000038295.3,TLL1,coding,chr4:166794409-167025047	0.418883	1	0.483455
ENSG00000005108.8,THSD7A,coding,chr7:11410063-11871824	ENSG00000041982.9,TNC,coding,chr9:117782805-117880536	0.322725	2	0.483455
ENSG00000005108.8,THSD7A,coding,chr7:11410063-11871824	ENSG00000016602.8,CLCA4,coding,chr1:87012760-87046437	0.321212	3	0.483455
ENSG00000005108.8,THSD7A,coding,chr7:11410063-11871824	ENSG00000001497.12,LAS1L,coding,chrX:64732461-64754655	-0.318411	4	0.483455
ENSG00000005108.8,THSD7A,coding,chr7:11410063-11871824	ENSG00000008256.11,CYTH3,coding,chr7:6201406-6312275	0.303931	5	0.483455
ENSG00000005108.8,THSD7A,coding,chr7:11410063-11871824	ENSG00000057704.6,TMCC3,coding,chr12:94960899-95044338	0.302877	6	0.483455
ENSG00000005108.8,THSD7A,coding,chr7:11410063-11871824	ENSG00000000971.10,CFH,coding,chr1:196621007-196716634	0.286745	7	0.483455
ENSG00000005108.8,THSD7A,coding,chr7:11410063-11871824	ENSG00000000938.7,FGR,coding,chr1:27938574-27961788	0.218296	8	0.483455
ENSG00000005108.8,THSD7A,coding,chr7:11410063-11871824	ENSG00000000457.8,SCYL3,coding,chr1:169821803-169863408	0.208443	9	0.483455
ENSG00000005108.8,THSD7A,coding,chr7:11410063-11871824	ENSG00000010282.9,HHATL,coding,chr3:42734154-42744319	0.205661	10	0.483455
ENSG00000005108.8,THSD7A,coding,chr7:11410063-11871824	ENSG00000001167.10,NFYA,coding,chr6:41040683-41067715	0.193314	11	0.483455
ENSG00000005108.8,THSD7A,coding,chr7:11410063-11871824	ENSG00000004776.5,HSPB6,coding,chr19:36245469-36247930	0.152412	12	0.483455
ENSG00000005108.8,THSD7A,coding,chr7:11410063-11871824	ENSG00000004809.9,SLC22A16,coding,chr6:110745889-110797844	0.149966	13	0.483455
ENSG00000005108.8,THSD7A,coding,chr7:11410063-11871824	ENSG00000000460.11,C1orf112,coding,chr1:169631244-169823221	-0.0520933	14	0.483455
ENSG00000005156.5,LIG3,coding,chr17:33307541-33332083	ENSG00000010244.10,ZNF207,coding,chr17:30677149-30714780	0.599551	1	0.656184
ENSG00000005156.5,LIG3,coding,chr17:33307541-33332083	ENSG00000004487.10,KDM1A,coding,chr1:23345940-23410182	0.530098	2	0.656184
ENSG00000005156.5,LIG3,coding,chr17:33307541-33332083	ENSG00000005955.7,GGNBP2,coding,chr17:34900772-34946278	0.488757	3	0.656184
ENSG00000005156.5,LIG3,coding,chr17:33307541-33332083	ENSG00000006114.10,SYNRG,coding,chr17:35874899-35969488	0.427488	4	0.656184
ENSG00000005156.5,LIG3,coding,chr17:33307541-33332083	ENSG00000001167.10,NFYA,coding,chr6:41040683-41067715	0.394682	5	0.656184
ENSG00000005156.5,LIG3,coding,chr17:33307541-33332083	ENSG00000113811.6,RP11-884K10.5.1,coding,chr3:53918436-53926015	-0.321547	6	0.656184
ENSG00000005156.5,LIG3,coding,chr17:33307541-33332083	ENSG00000000460.11,C1orf112,coding,chr1:169631244-169823221	0.316981	7	0.656184
ENSG00000005156.5,LIG3,coding,chr17:33307541-33332083	ENSG00000001630.10,CYP51A1,coding,chr7:91741464-91772266	0.309637	8	0.656184
ENSG00000005156.5,LIG3,coding,chr17:33307541-33332083	ENSG00000000457.8,SCYL3,coding,chr1:169821803-169863408	0.297964	9	0.656184
ENSG00000005156.5,LIG3,coding,chr17:33307541-33332083	ENSG00000006042.5,TMEM98,coding,chr17:31254927-31268667	0.293072	10	0.656184
ENSG00000005156.5,LIG3,coding,chr17:33307541-33332083	ENSG00000001084.6,GCLC,coding,chr6:53362138-53481768	0.275278	11	0.656184
ENSG00000005156.5,LIG3,coding,chr17:33307541-33332083	ENSG00000001460.12,C1orf201,coding,chr1:24683488-24743424	0.232046	12	0.656184
ENSG00000005156.5,LIG3,coding,chr17:33307541-33332083	ENSG00000001497.12,LAS1L,coding,chrX:64732461-64754655	0.231552	13	0.656184
ENSG00000005156.5,LIG3,coding,chr17:33307541-33332083	ENSG00000002726.14,ABP1,coding,chr7:150521714-150558592	-0.230502	14	0.656184
ENSG00000005156.5,LIG3,coding,chr17:33307541-33332083	ENSG00000000419.7,DPM1,coding,chr20:49551403-49575092	0.198035	15	0.656184
ENSG00000005156.5,LIG3,coding,chr17:33307541-33332083	ENSG00000002330.8,BAD,coding,chr11:64037301-64052176	-0.185026	16	0.656184
ENSG00000005156.5,LIG3,coding,chr17:33307541-33332083	ENSG00000005471.11,ABCB4,coding,chr7:87031012-87109751	-0.182821	17	0.656184
ENSG00000005156.5,LIG3,coding,chr17:33307541-33332083	ENSG00000000003.9,TSPAN6,coding,chrX:99883666-99894988	0.173827	18	0.656184
ENSG00000005156.5,LIG3,coding,chr17:33307541-33332083	ENSG00000006451.3,RALA,coding,chr7:39663081-39747723	0.0624313	19	0.656184
ENSG00000005156.5,LIG3,coding,chr17:33307541-33332083	ENSG00000013275.2,PSMC4,coding,chr19:40477072-40487351	0.0615086	20	0.656184
ENSG00000005156.5,LIG3,coding,chr17:33307541-33332083	ENSG00000001036.8,FUCA2,coding,chr6:143816613-143832827	-0.0524715	21	0.656184
ENSG00000005175.5,RPAP3,coding,chr12:48057069-48099844	ENSG00000000419.7,DPM1,coding,chr20:49551403-49575092	0.821533	1	0.927264
ENSG00000005175.5,RPAP3,coding,chr12:48057069-48099844	ENSG00000011260.6,UTP18,coding,chr17:49337888-49375297	0.797693	2	0.927264
ENSG00000005175.5,RPAP3,coding,chr12:48057069-48099844	ENSG00000079387.9,SENP1,coding,chr12:48436680-48500091	0.76646	3	0.927264
ENSG00000005175.5,RPAP3,coding,chr12:48057069-48099844	ENSG00000004897.5,CDC27,coding,chr17:45195068-45266788	0.74707	4	0.927264
ENSG00000005175.5,RPAP3,coding,chr12:48057069-48099844	ENSG00000020922.7,MRE11A,coding,chr11:94152894-94227074	0.735467	5	0.927264
ENSG00000005175.5,RPAP3,coding,chr12:48057069-48099844	ENSG00000008405.6,CRY1,coding,chr12:107385141-107487607	0.724864	6	0.927264
ENSG00000005175.5,RPAP3,coding,chr12:48057069-48099844	ENSG00000138036.12,DYNC2LI1,coding,chr2:44001177-44037149	0.697704	7	0.927264
ENSG00000005175.5,RPAP3,coding,chr12:48057069-48099844	ENSG00000015153.10,YAF2,coding,chr12:42550905-42632151	0.694181	8	0.927264
ENSG00000005175.5,RPAP3,coding,chr12:48057069-48099844	ENSG00000091140.5,DLD,coding,chr7:107531414-107572175	0.630137	9	0.927264
ENSG00000005175.5,RPAP3,coding,chr12:48057069-48099844	ENSG00000008282.3,SYPL1,coding,chr7:105730948-105753022	0.595982	10	0.927264
ENSG00000005175.5,RPAP3,coding,chr12:48057069-48099844	ENSG00000032444.9,PNPLA6,coding,chr19:7599037-7626653	-0.511202	11	0.927264
ENSG00000005175.5,RPAP3,coding,chr12:48057069-48099844	ENSG00000004487.10,KDM1A,coding,chr1:23345940-23410182	0.463633	12	0.927264
ENSG00000005175.5,RPAP3,coding,chr12:48057069-48099844	ENSG00000001167.10,NFYA,coding,chr6:41040683-41067715	0.454844	13	0.927264
ENSG00000005175.5,RPAP3,coding,chr12:48057069-48099844	ENSG00000000003.9,TSPAN6,coding,chrX:99883666-99894988	0.417898	14	0.927264
ENSG00000005175.5,RPAP3,coding,chr12:48057069-48099844	ENSG00000000457.8,SCYL3,coding,chr1:169821803-169863408	0.402978	15	0.927264
ENSG00000005175.5,RPAP3,coding,chr12:48057069-48099844	ENSG00000108389.4,MTMR4,coding,chr17:56566892-56595251	0.37534	16	0.927264
ENSG00000005175.5,RPAP3,coding,chr12:48057069-48099844	ENSG00000001617.7,SEMA3F,coding,chr3:50192477-50226508	-0.333398	17	0.927264
ENSG00000005175.5,RPAP3,coding,chr12:48057069-48099844	ENSG00000002549.7,LAP3,coding,chr4:17578814-17609595	0.325247	18	0.927264
ENSG00000005175.5,RPAP3,coding,chr12:48057069-48099844	ENSG00000004455.11,AK2,coding,chr1:33473584-33546597	0.320789	19	0.927264
ENSG00000005175.5,RPAP3,coding,chr12:48057069-48099844	ENSG00000150281.6,CTF1,coding,chr16:30907927-30914881	-0.206719	20	0.927264
ENSG00000005175.5,RPAP3,coding,chr12:48057069-48099844	ENSG00000061273.12,HDAC7,coding,chr12:48176504-48226915	0.162868	21	0.927264
ENSG00000005175.5,RPAP3,coding,chr12:48057069-48099844	ENSG00000002587.5,HS3ST1,coding,chr4:11394773-11431389	-0.150617	22	0.927264
ENSG00000005175.5,RPAP3,coding,chr12:48057069-48099844	ENSG00000023191.11,RNH1,coding,chr11:494511-507300	-0.122153	23	0.927264
ENSG00000005175.5,RPAP3,coding,chr12:48057069-48099844	ENSG00000044446.6,PHKA2,coding,chrX:18910417-19002716	-0.0917006	24	0.927264
ENSG00000005175.5,RPAP3,coding,chr12:48057069-48099844	ENSG00000002726.14,ABP1,coding,chr7:150521714-150558592	-0.0723827	25	0.927264
ENSG00000005175.5,RPAP3,coding,chr12:48057069-48099844	ENSG00000001460.12,C1orf201,coding,chr1:24683488-24743424	0.0698022	26	0.927264
ENSG00000005175.5,RPAP3,coding,chr12:48057069-48099844	ENSG00000166165.7,CKB,coding,chr14:103985995-103989448	-0.0263366	27	0.927264
ENSG00000005175.5,RPAP3,coding,chr12:48057069-48099844	ENSG00000001630.10,CYP51A1,coding,chr7:91741464-91772266	-0.0233193	28	0.927264
ENSG00000005187.7,ACSM3,coding,chr16:20621564-20808903	ENSG00000101049.10,SGK2,coding,chr20:42187607-42216877	0.600994	1	0.756637
ENSG00000005187.7,ACSM3,coding,chr16:20621564-20808903	ENSG00000026297.10,RNASET2,coding,chr6:167342991-167370679	0.460287	2	0.756637
ENSG00000005187.7,ACSM3,coding,chr16:20621564-20808903	ENSG00000007129.10,CEACAM21,coding,chr19:42041701-42093197	0.450222	3	0.756637
ENSG00000005187.7,ACSM3,coding,chr16:20621564-20808903	ENSG00000066654.8,THUMPD1,coding,chr16:20744985-20753406	0.445787	4	0.756637
ENSG00000005187.7,ACSM3,coding,chr16:20621564-20808903	ENSG00000146049.1,KAAG1,coding,chr6:24357130-24358512	0.357297	5	0.756637
ENSG00000005187.7,ACSM3,coding,chr16:20621564-20808903	ENSG00000006611.10,USH1C,coding,chr11:17515441-17565963	0.326228	6	0.756637
ENSG00000005187.7,ACSM3,coding,chr16:20621564-20808903	ENSG00000063015.12,SEZ6,coding,chr17:27281918-27333458	-0.301049	7	0.756637
ENSG00000005187.7,ACSM3,coding,chr16:20621564-20808903	ENSG00000005189.14,AC004381.6.1,coding,chr16:20817750-20860990	0.283837	8	0.756637
ENSG00000005187.7,ACSM3,coding,chr16:20621564-20808903	ENSG00000001626.8,CFTR,coding,chr7:117105837-117308719	0.279906	9	0.756637
ENSG00000005187.7,ACSM3,coding,chr16:20621564-20808903	ENSG00000011677.7,GABRA3,coding,chrX:151334705-151620337	-0.278684	10	0.756637
ENSG00000005187.7,ACSM3,coding,chr16:20621564-20808903	ENSG00000001036.8,FUCA2,coding,chr6:143816613-143832827	0.263404	11	0.756637
ENSG00000005187.7,ACSM3,coding,chr16:20621564-20808903	ENSG00000007968.6,E2F2,coding,chr1:23832921-23857712	-0.260744	12	0.756637
ENSG00000005187.7,ACSM3,coding,chr16:20621564-20808903	ENSG00000001460.12,C1orf201,coding,chr1:24683488-24743424	0.257938	13	0.756637
ENSG00000005187.7,ACSM3,coding,chr16:20621564-20808903	ENSG00000005486.10,RHBDD2,coding,chr7:75471919-75518244	-0.235973	14	0.756637
ENSG00000005187.7,ACSM3,coding,chr16:20621564-20808903	ENSG00000005961.11,ITGA2B,coding,chr17:42449549-42466873	0.212989	15	0.756637
ENSG00000005187.7,ACSM3,coding,chr16:20621564-20808903	ENSG00000005059.11,CCDC109B,coding,chr4:110481360-110609874	-0.202293	16	0.756637
ENSG00000005187.7,ACSM3,coding,chr16:20621564-20808903	ENSG00000006210.6,CX3CL1,coding,chr16:57406369-57418960	0.140531	17	0.756637
ENSG00000005187.7,ACSM3,coding,chr16:20621564-20808903	ENSG00000014216.9,CAPN1,coding,chr11:64948036-64979477	0.110331	18	0.756637
ENSG00000005187.7,ACSM3,coding,chr16:20621564-20808903	ENSG00000006432.10,MAP3K9,coding,chr14:71189242-71276251	-0.10137	19	0.756637
ENSG00000005187.7,ACSM3,coding,chr16:20621564-20808903	ENSG00000044115.14,CTNNA1,coding,chr5:137946655-138270723	0.0899795	20	0.756637
ENSG00000005187.7,ACSM3,coding,chr16:20621564-20808903	ENSG00000005448.12,WDR54,coding,chr2:74648804-74652882	-0.0626829	21	0.756637
ENSG00000005187.7,ACSM3,coding,chr16:20621564-20808903	ENSG00000007341.12,ST7L,coding,chr1:113066139-113163447	-0.0484408	22	0.756637
ENSG00000005187.7,ACSM3,coding,chr16:20621564-20808903	ENSG00000134318.8,ROCK2,coding,chr2:11319886-11488456	-0.0306854	23	0.756637
ENSG00000005187.7,ACSM3,coding,chr16:20621564-20808903	ENSG00000070367.11,EXOC5,coding,chr14:57670517-57735726	0.0291576	24	0.756637
ENSG00000005187.7,ACSM3,coding,chr16:20621564-20808903	ENSG00000087365.8,SF3B2,coding,chr11:65818199-65836779	-0.0265136	25	0.756637
ENSG00000005189.14,AC004381.6.1,coding,chr16:20817750-20860990	ENSG00000024526.11,DEPDC1,coding,chr1:68939834-68962904	0.404142	1	0.639585
ENSG00000005189.14,AC004381.6.1,coding,chr16:20817750-20860990	ENSG00000004779.4,NDUFAB1,coding,chr16:23592322-23607677	0.398547	2	0.639585
ENSG00000005189.14,AC004381.6.1,coding,chr16:20817750-20860990	ENSG00000014919.7,COX15,coding,chr10:101471600-101491866	0.364821	3	0.639585
ENSG00000005189.14,AC004381.6.1,coding,chr16:20817750-20860990	ENSG00000001460.12,C1orf201,coding,chr1:24683488-24743424	0.302791	4	0.639585
ENSG00000005189.14,AC004381.6.1,coding,chr16:20817750-20860990	ENSG00000000460.11,C1orf112,coding,chr1:169631244-169823221	0.291178	5	0.639585
ENSG00000005189.14,AC004381.6.1,coding,chr16:20817750-20860990	ENSG00000005187.7,ACSM3,coding,chr16:20621564-20808903	0.283837	6	0.639585
ENSG00000005189.14,AC004381.6.1,coding,chr16:20817750-20860990	ENSG00000002330.8,BAD,coding,chr11:64037301-64052176	0.282847	7	0.639585
ENSG00000005189.14,AC004381.6.1,coding,chr16:20817750-20860990	ENSG00000005884.11,ITGA3,coding,chr17:48133331-48167848	-0.277026	8	0.639585
ENSG00000005189.14,AC004381.6.1,coding,chr16:20817750-20860990	ENSG00000001617.7,SEMA3F,coding,chr3:50192477-50226508	-0.276223	9	0.639585
ENSG00000005189.14,AC004381.6.1,coding,chr16:20817750-20860990	ENSG00000000419.7,DPM1,coding,chr20:49551403-49575092	0.254314	10	0.639585
ENSG00000005189.14,AC004381.6.1,coding,chr16:20817750-20860990	ENSG00000001497.12,LAS1L,coding,chrX:64732461-64754655	0.253611	11	0.639585
ENSG00000005189.14,AC004381.6.1,coding,chr16:20817750-20860990	ENSG00000013588.5,GPRC5A,coding,chr12:13043715-13070871	-0.241951	12	0.639585
ENSG00000005189.14,AC004381.6.1,coding,chr16:20817750-20860990	ENSG00000003402.12,CFLAR,coding,chr2:201980826-202029033	0.150718	13	0.639585
ENSG00000005189.14,AC004381.6.1,coding,chr16:20817750-20860990	ENSG00000070614.9,NDST1,coding,chr5:149865380-149937773	-0.138229	14	0.639585
ENSG00000005189.14,AC004381.6.1,coding,chr16:20817750-20860990	ENSG00000007376.3,RPUSD1,coding,chr16:834973-838397	0.129933	15	0.639585
ENSG00000005189.14,AC004381.6.1,coding,chr16:20817750-20860990	ENSG00000037474.10,NSUN2,coding,chr5:6599351-6633404	0.11641	16	0.639585
ENSG00000005189.14,AC004381.6.1,coding,chr16:20817750-20860990	ENSG00000067836.6,ROGDI,coding,chr16:4846968-4852951	0.0905187	17	0.639585
ENSG00000005189.14,AC004381.6.1,coding,chr16:20817750-20860990	ENSG00000001461.11,NIPAL3,coding,chr1:24742283-24799466	-0.0466356	18	0.639585
ENSG00000005194.10,CIAPIN1,coding,chr16:57462080-57481440	ENSG00000088682.9,COQ9,coding,chr16:57481336-57495187	0.650011	1	0.823612
ENSG00000005194.10,CIAPIN1,coding,chr16:57462080-57481440	ENSG00000070770.3,CSNK2A2,coding,chr16:58191810-58231824	0.592653	2	0.823612
ENSG00000005194.10,CIAPIN1,coding,chr16:57462080-57481440	ENSG00000038358.9,EDC4,coding,chr16:67906974-67918406	0.519681	3	0.823612
ENSG00000005194.10,CIAPIN1,coding,chr16:57462080-57481440	ENSG00000087263.11,OGFOD1,coding,chr16:56485401-56513012	0.45131	4	0.823612
ENSG00000005194.10,CIAPIN1,coding,chr16:57462080-57481440	ENSG00000003249.8,DBNDD1,coding,chr16:90071272-90086536	0.403701	5	0.823612
ENSG00000005194.10,CIAPIN1,coding,chr16:57462080-57481440	ENSG00000004487.10,KDM1A,coding,chr1:23345940-23410182	0.389666	6	0.823612
ENSG00000005194.10,CIAPIN1,coding,chr16:57462080-57481440	ENSG00000007923.11,DNAJC11,coding,chr1:6694227-6761984	0.385045	7	0.823612
ENSG00000005194.10,CIAPIN1,coding,chr16:57462080-57481440	ENSG00000034713.3,GABARAPL2,coding,chr16:75600248-75611779	0.350412	8	0.823612
ENSG00000005194.10,CIAPIN1,coding,chr16:57462080-57481440	ENSG00000099995.12,SF3A1,coding,chr22:30727978-30752936	0.288657	9	0.823612
ENSG00000005194.10,CIAPIN1,coding,chr16:57462080-57481440	ENSG00000001630.10,CYP51A1,coding,chr7:91741464-91772266	0.196443	10	0.823612
ENSG00000005194.10,CIAPIN1,coding,chr16:57462080-57481440	ENSG00000076928.11,ARHGEF1,coding,chr19:42387266-42411597	-0.19071	11	0.823612
ENSG00000005194.10,CIAPIN1,coding,chr16:57462080-57481440	ENSG00000105887.10,MTPN,coding,chr7:135611508-135662101	0.151913	12	0.823612
ENSG00000005194.10,CIAPIN1,coding,chr16:57462080-57481440	ENSG00000005884.11,ITGA3,coding,chr17:48133331-48167848	0.150444	13	0.823612
ENSG00000005194.10,CIAPIN1,coding,chr16:57462080-57481440	ENSG00000000003.9,TSPAN6,coding,chrX:99883666-99894988	0.145389	14	0.823612
ENSG00000005194.10,CIAPIN1,coding,chr16:57462080-57481440	ENSG00000008382.10,MPND,coding,chr19:4343523-4360082	0.144536	15	0.823612
ENSG00000005194.10,CIAPIN1,coding,chr16:57462080-57481440	ENSG00000004777.10,ARHGAP33,coding,chr19:36266416-36279724	-0.135849	16	0.823612
ENSG00000005194.10,CIAPIN1,coding,chr16:57462080-57481440	ENSG00000049618.14,ARID1B,coding,chr6:157099062-157530401	0.120732	17	0.823612
ENSG00000005194.10,CIAPIN1,coding,chr16:57462080-57481440	ENSG00000090686.11,USP48,coding,chr1:22004790-22110099	0.111651	18	0.823612
ENSG00000005194.10,CIAPIN1,coding,chr16:57462080-57481440	ENSG00000040275.11,CCDC99,coding,chr5:169010637-169031782	0.0926455	19	0.823612
ENSG00000005194.10,CIAPIN1,coding,chr16:57462080-57481440	ENSG00000036054.8,TBC1D23,coding,chr3:99979843-100044095	-0.0848972	20	0.823612
ENSG00000005194.10,CIAPIN1,coding,chr16:57462080-57481440	ENSG00000099326.3,MZF1,coding,chr19:59073284-59084942	-0.0830181	21	0.823612
ENSG00000005194.10,CIAPIN1,coding,chr16:57462080-57481440	ENSG00000068400.8,GRIPAP1,coding,chrX:48830133-48858675	-0.0628749	22	0.823612
ENSG00000005194.10,CIAPIN1,coding,chr16:57462080-57481440	ENSG00000102243.7,VGLL1,coding,chrX:135614310-135638966	0.0607975	23	0.823612
ENSG00000005194.10,CIAPIN1,coding,chr16:57462080-57481440	ENSG00000095739.6,BAMBI,coding,chr10:28966270-28971868	0.0512341	24	0.823612
ENSG00000005206.9,AC004410.1,coding,chr19:2328628-2355099	ENSG00000071655.9,MBD3,coding,chr19:1576677-1592710	0.648411	1	0.879158
ENSG00000005206.9,AC004410.1,coding,chr19:2328628-2355099	ENSG00000000419.7,DPM1,coding,chr20:49551403-49575092	-0.619292	2	0.879158
ENSG00000005206.9,AC004410.1,coding,chr19:2328628-2355099	ENSG00000011132.6,APBA3,coding,chr19:3750770-3761673	0.569884	3	0.879158
ENSG00000005206.9,AC004410.1,coding,chr19:2328628-2355099	ENSG00000008382.10,MPND,coding,chr19:4343523-4360082	0.524722	4	0.879158
ENSG00000005206.9,AC004410.1,coding,chr19:2328628-2355099	ENSG00000104886.3,PLEKHJ1,coding,chr19:2233154-2236319	0.501003	5	0.879158
ENSG00000005206.9,AC004410.1,coding,chr19:2328628-2355099	ENSG00000017797.6,RALBP1,coding,chr18:9475006-9538112	-0.479777	6	0.879158
ENSG00000005206.9,AC004410.1,coding,chr19:2328628-2355099	ENSG00000105523.2,FAM83E,coding,chr19:49103856-49116694	0.474985	7	0.879158
ENSG00000005206.9,AC004410.1,coding,chr19:2328628-2355099	ENSG00000003756.11,RBM5,coding,chr3:50126340-50156454	0.472801	8	0.879158
ENSG00000005206.9,AC004410.1,coding,chr19:2328628-2355099	ENSG00000035499.8,DEPDC1B,coding,chr5:59892738-59996017	-0.470203	9	0.879158
ENSG00000005206.9,AC004410.1,coding,chr19:2328628-2355099	ENSG00000001460.12,C1orf201,coding,chr1:24683488-24743424	0.469577	10	0.879158
ENSG00000005206.9,AC004410.1,coding,chr19:2328628-2355099	ENSG00000008283.10,CYB561,coding,chr17:61509667-61523722	0.460014	11	0.879158
ENSG00000005206.9,AC004410.1,coding,chr19:2328628-2355099	ENSG00000004059.5,ARF5,coding,chr7:127228398-127231759	0.437835	12	0.879158
ENSG00000005206.9,AC004410.1,coding,chr19:2328628-2355099	ENSG00000018699.7,TTC27,coding,chr2:32853098-33046118	-0.435107	13	0.879158
ENSG00000005206.9,AC004410.1,coding,chr19:2328628-2355099	ENSG00000015479.12,MATR3,coding,chr5:138609440-138667360	-0.387028	14	0.879158
ENSG00000005206.9,AC004410.1,coding,chr19:2328628-2355099	ENSG00000023330.9,ALAS1,coding,chr3:52232101-52248343	-0.318004	15	0.879158
ENSG00000005206.9,AC004410.1,coding,chr19:2328628-2355099	ENSG00000106682.10,EIF4H,coding,chr7:73588574-73611431	-0.314386	16	0.879158
ENSG00000005206.9,AC004410.1,coding,chr19:2328628-2355099	ENSG00000002587.5,HS3ST1,coding,chr4:11394773-11431389	0.286984	17	0.879158
ENSG00000005206.9,AC004410.1,coding,chr19:2328628-2355099	ENSG00000011376.5,LARS2,coding,chr3:45429997-45590913	-0.216157	18	0.879158
ENSG00000005206.9,AC004410.1,coding,chr19:2328628-2355099	ENSG00000002330.8,BAD,coding,chr11:64037301-64052176	0.196079	19	0.879158
ENSG00000005206.9,AC004410.1,coding,chr19:2328628-2355099	ENSG00000006607.8,FARP2,coding,chr2:242295657-242434256	0.15264	20	0.879158
ENSG00000005206.9,AC004410.1,coding,chr19:2328628-2355099	ENSG00000011304.10,PTBP1,coding,chr19:797391-812327	0.140271	21	0.879158
ENSG00000005206.9,AC004410.1,coding,chr19:2328628-2355099	ENSG00000002016.11,RAD52,coding,chr12:1021242-1100356	0.132317	22	0.879158
ENSG00000005206.9,AC004410.1,coding,chr19:2328628-2355099	ENSG00000001461.11,NIPAL3,coding,chr1:24742283-24799466	-0.129573	23	0.879158
ENSG00000005206.9,AC004410.1,coding,chr19:2328628-2355099	ENSG00000075131.5,TIPIN,coding,chr15:66628543-66679084	-0.0841389	24	0.879158
ENSG00000005206.9,AC004410.1,coding,chr19:2328628-2355099	ENSG00000068885.10,IFT80,coding,chr3:159974773-160117668	0.0402501	25	0.879158
ENSG00000005206.9,AC004410.1,coding,chr19:2328628-2355099	ENSG00000000457.8,SCYL3,coding,chr1:169821803-169863408	-0.0312781	26	0.879158
ENSG00000005238.13,FAM214B,coding,chr9:35104108-35115999	ENSG00000100968.9,NFATC4,coding,chr14:24834878-24848810	0.418159	1	0.790412
ENSG00000005238.13,FAM214B,coding,chr9:35104108-35115999	ENSG00000006638.6,TBXA2R,coding,chr19:3594503-3606831	0.400384	2	0.790412
ENSG00000005238.13,FAM214B,coding,chr9:35104108-35115999	ENSG00000107140.9,TESK1,coding,chr9:35605280-35610038	0.374284	3	0.790412
ENSG00000005238.13,FAM214B,coding,chr9:35104108-35115999	ENSG00000007384.9,RHBDF1,coding,chr16:108057-126354	0.356593	4	0.790412
ENSG00000005238.13,FAM214B,coding,chr9:35104108-35115999	ENSG00000000457.8,SCYL3,coding,chr1:169821803-169863408	-0.323786	5	0.790412
ENSG00000005238.13,FAM214B,coding,chr9:35104108-35115999	ENSG00000107175.6,CREB3,coding,chr9:35732331-35737001	0.283187	6	0.790412
ENSG00000005238.13,FAM214B,coding,chr9:35104108-35115999	ENSG00000006432.10,MAP3K9,coding,chr14:71189242-71276251	0.279768	7	0.790412
ENSG00000005238.13,FAM214B,coding,chr9:35104108-35115999	ENSG00000002919.9,SNX11,coding,chr17:46184910-46200105	0.250639	8	0.790412
ENSG00000005238.13,FAM214B,coding,chr9:35104108-35115999	ENSG00000011009.5,LYPLA2,coding,chr1:24117459-24122029	0.235251	9	0.790412
ENSG00000005238.13,FAM214B,coding,chr9:35104108-35115999	ENSG00000005884.11,ITGA3,coding,chr17:48133331-48167848	0.23499	10	0.790412
ENSG00000005238.13,FAM214B,coding,chr9:35104108-35115999	ENSG00000084070.6,SMAP2,coding,chr1:40810521-40888998	0.233121	11	0.790412
ENSG00000005238.13,FAM214B,coding,chr9:35104108-35115999	ENSG00000034053.9,APBA2,coding,chr15:29129628-29410518	-0.229986	12	0.790412
ENSG00000005238.13,FAM214B,coding,chr9:35104108-35115999	ENSG00000003137.4,CYP26B1,coding,chr2:72356366-72375167	0.226823	13	0.790412
ENSG00000005238.13,FAM214B,coding,chr9:35104108-35115999	ENSG00000005187.7,ACSM3,coding,chr16:20621564-20808903	-0.21883	14	0.790412
ENSG00000005238.13,FAM214B,coding,chr9:35104108-35115999	ENSG00000004534.9,RBM6,coding,chr3:49977439-50137478	0.215455	15	0.790412
ENSG00000005238.13,FAM214B,coding,chr9:35104108-35115999	ENSG00000035115.15,SH3YL1,coding,chr2:217729-266398	-0.210775	16	0.790412
ENSG00000005238.13,FAM214B,coding,chr9:35104108-35115999	ENSG00000135723.8,FHOD1,coding,chr16:67263289-67281561	0.197571	17	0.790412
ENSG00000005238.13,FAM214B,coding,chr9:35104108-35115999	ENSG00000141298.10,SSH2,coding,chr17:27952955-28257170	0.18361	18	0.790412
ENSG00000005238.13,FAM214B,coding,chr9:35104108-35115999	ENSG00000010256.6,UQCRC1,coding,chr3:48636434-48648409	-0.158754	19	0.790412
ENSG00000005238.13,FAM214B,coding,chr9:35104108-35115999	ENSG00000084731.8,KIF3C,coding,chr2:26149470-26205618	0.142801	20	0.790412
ENSG00000005238.13,FAM214B,coding,chr9:35104108-35115999	ENSG00000001497.12,LAS1L,coding,chrX:64732461-64754655	-0.139449	21	0.790412
ENSG00000005238.13,FAM214B,coding,chr9:35104108-35115999	ENSG00000004455.11,AK2,coding,chr1:33473584-33546597	-0.0947913	22	0.790412
ENSG00000005238.13,FAM214B,coding,chr9:35104108-35115999	ENSG00000002016.11,RAD52,coding,chr12:1021242-1100356	0.0894733	23	0.790412
ENSG00000005238.13,FAM214B,coding,chr9:35104108-35115999	ENSG00000011304.10,PTBP1,coding,chr19:797391-812327	-0.0828464	24	0.790412
ENSG00000005238.13,FAM214B,coding,chr9:35104108-35115999	ENSG00000005020.7,SKAP2,coding,chr7:26706680-27034858	0.0740103	25	0.790412
ENSG00000005238.13,FAM214B,coding,chr9:35104108-35115999	ENSG00000147164.6,SNX12,coding,chrX:70279093-70288273	0.0648782	26	0.790412
ENSG00000005238.13,FAM214B,coding,chr9:35104108-35115999	ENSG00000115318.7,LOXL3,coding,chr2:74759540-74782817	-0.039615	27	0.790412
ENSG00000005238.13,FAM214B,coding,chr9:35104108-35115999	ENSG00000050555.11,LAMC3,coding,chr9:133884468-133969860	0.0173143	28	0.790412
ENSG00000005243.4,COPZ2,coding,chr17:46103534-46115139	ENSG00000006638.6,TBXA2R,coding,chr19:3594503-3606831	0.558299	1	0.6957
ENSG00000005243.4,COPZ2,coding,chr17:46103534-46115139	ENSG00000108821.7,COL1A1,coding,chr17:48260649-48278993	0.469249	2	0.6957
ENSG00000005243.4,COPZ2,coding,chr17:46103534-46115139	ENSG00000004776.5,HSPB6,coding,chr19:36245469-36247930	0.442459	3	0.6957
ENSG00000005243.4,COPZ2,coding,chr17:46103534-46115139	ENSG00000087303.11,NID2,coding,chr14:52471520-52536545	0.402435	4	0.6957
ENSG00000005243.4,COPZ2,coding,chr17:46103534-46115139	ENSG00000003436.10,TFPI,coding,chr2:188328956-188430487	0.31139	5	0.6957
ENSG00000005243.4,COPZ2,coding,chr17:46103534-46115139	ENSG00000002933.3,TMEM176A,coding,chr7:150497490-150502208	0.296938	6	0.6957
ENSG00000005243.4,COPZ2,coding,chr17:46103534-46115139	ENSG00000002330.8,BAD,coding,chr11:64037301-64052176	0.294837	7	0.6957
ENSG00000005243.4,COPZ2,coding,chr17:46103534-46115139	ENSG00000004399.8,PLXND1,coding,chr3:129274017-129325661	0.264778	8	0.6957
ENSG00000005243.4,COPZ2,coding,chr17:46103534-46115139	ENSG00000001630.10,CYP51A1,coding,chr7:91741464-91772266	-0.256249	9	0.6957
ENSG00000005243.4,COPZ2,coding,chr17:46103534-46115139	ENSG00000005073.5,HOXA11,coding,chr7:27221128-27224842	0.253418	10	0.6957
ENSG00000005243.4,COPZ2,coding,chr17:46103534-46115139	ENSG00000135740.11,SLC9A5,coding,chr16:67271585-67306093	0.250944	11	0.6957
ENSG00000005243.4,COPZ2,coding,chr17:46103534-46115139	ENSG00000000457.8,SCYL3,coding,chr1:169821803-169863408	-0.240784	12	0.6957
ENSG00000005243.4,COPZ2,coding,chr17:46103534-46115139	ENSG00000000938.7,FGR,coding,chr1:27938574-27961788	0.221632	13	0.6957
ENSG00000005243.4,COPZ2,coding,chr17:46103534-46115139	ENSG00000004838.9,ZMYND10,coding,chr3:50378540-50384283	-0.193873	14	0.6957
ENSG00000005243.4,COPZ2,coding,chr17:46103534-46115139	ENSG00000071564.8,TCF3,coding,chr19:1609292-1652326	-0.170393	15	0.6957
ENSG00000005243.4,COPZ2,coding,chr17:46103534-46115139	ENSG00000008952.10,SEC62,coding,chr3:169684422-169716161	0.158568	16	0.6957
ENSG00000005243.4,COPZ2,coding,chr17:46103534-46115139	ENSG00000000005.5,TNMD,coding,chrX:99839798-99854882	0.152436	17	0.6957
ENSG00000005243.4,COPZ2,coding,chr17:46103534-46115139	ENSG00000000003.9,TSPAN6,coding,chrX:99883666-99894988	-0.147776	18	0.6957
ENSG00000005243.4,COPZ2,coding,chr17:46103534-46115139	ENSG00000005187.7,ACSM3,coding,chr16:20621564-20808903	-0.146403	19	0.6957
ENSG00000005243.4,COPZ2,coding,chr17:46103534-46115139	ENSG00000002746.8,HECW1,coding,chr7:43152197-43602938	0.132425	20	0.6957
ENSG00000005243.4,COPZ2,coding,chr17:46103534-46115139	ENSG00000047249.11,ATP6V1H,coding,chr8:54628116-54756118	0.0550698	21	0.6957
ENSG00000005249.6,PRKAR2B,coding,chr7:106685093-106802256	ENSG00000013619.8,MAMLD1,coding,chrX:149529688-149682448	0.481334	1	0.71936
ENSG00000005249.6,PRKAR2B,coding,chr7:106685093-106802256	ENSG00000058063.9,ATP11B,coding,chr3:182511287-182639423	0.435048	2	0.71936
ENSG00000005249.6,PRKAR2B,coding,chr7:106685093-106802256	ENSG00000000419.7,DPM1,coding,chr20:49551403-49575092	0.374482	3	0.71936
ENSG00000005249.6,PRKAR2B,coding,chr7:106685093-106802256	ENSG00000009694.9,ODZ1,coding,chrX:123509752-124097666	0.367405	4	0.71936
ENSG00000005249.6,PRKAR2B,coding,chr7:106685093-106802256	ENSG00000076248.4,UNG,coding,chr12:109535378-109548797	0.353569	5	0.71936
ENSG00000005249.6,PRKAR2B,coding,chr7:106685093-106802256	ENSG00000005059.11,CCDC109B,coding,chr4:110481360-110609874	0.316018	6	0.71936
ENSG00000005249.6,PRKAR2B,coding,chr7:106685093-106802256	ENSG00000005436.9,GCFC2,coding,chr2:75879125-75938115	0.307385	7	0.71936
ENSG00000005249.6,PRKAR2B,coding,chr7:106685093-106802256	ENSG00000000003.9,TSPAN6,coding,chrX:99883666-99894988	0.29908	8	0.71936
ENSG00000005249.6,PRKAR2B,coding,chr7:106685093-106802256	ENSG00000058600.11,POLR3E,coding,chr16:22308729-22346424	-0.279574	9	0.71936
ENSG00000005249.6,PRKAR2B,coding,chr7:106685093-106802256	ENSG00000013288.4,MAN2B2,coding,chr4:6576901-6625089	-0.26681	10	0.71936
ENSG00000005249.6,PRKAR2B,coding,chr7:106685093-106802256	ENSG00000001167.10,NFYA,coding,chr6:41040683-41067715	0.258298	11	0.71936
ENSG00000005249.6,PRKAR2B,coding,chr7:106685093-106802256	ENSG00000005243.4,COPZ2,coding,chr17:46103534-46115139	0.247567	12	0.71936
ENSG00000005249.6,PRKAR2B,coding,chr7:106685093-106802256	ENSG00000000971.10,CFH,coding,chr1:196621007-196716634	0.209243	13	0.71936
ENSG00000005249.6,PRKAR2B,coding,chr7:106685093-106802256	ENSG00000004848.6,ARX,coding,chrX:25021810-25034065	0.181504	14	0.71936
ENSG00000005249.6,PRKAR2B,coding,chr7:106685093-106802256	ENSG00000000938.7,FGR,coding,chr1:27938574-27961788	0.155212	15	0.71936
ENSG00000005249.6,PRKAR2B,coding,chr7:106685093-106802256	ENSG00000001497.12,LAS1L,coding,chrX:64732461-64754655	-0.145546	16	0.71936
ENSG00000005249.6,PRKAR2B,coding,chr7:106685093-106802256	ENSG00000002746.8,HECW1,coding,chr7:43152197-43602938	0.13125	17	0.71936
ENSG00000005249.6,PRKAR2B,coding,chr7:106685093-106802256	ENSG00000001036.8,FUCA2,coding,chr6:143816613-143832827	0.0660494	18	0.71936
ENSG00000005249.6,PRKAR2B,coding,chr7:106685093-106802256	ENSG00000015475.14,BID,coding,chr22:18216905-18257536	0.0594036	19	0.71936
ENSG00000005249.6,PRKAR2B,coding,chr7:106685093-106802256	ENSG00000071539.8,TRIP13,coding,chr5:892757-919472	0.0585177	20	0.71936
ENSG00000005249.6,PRKAR2B,coding,chr7:106685093-106802256	ENSG00000001617.7,SEMA3F,coding,chr3:50192477-50226508	0.0555132	21	0.71936
ENSG00000005249.6,PRKAR2B,coding,chr7:106685093-106802256	ENSG00000118733.11,OLFM3,coding,chr1:102268126-102462586	0.0447672	22	0.71936
ENSG00000005249.6,PRKAR2B,coding,chr7:106685093-106802256	ENSG00000003056.3,M6PR,coding,chr12:9092958-9102551	0.0288815	23	0.71936
ENSG00000005249.6,PRKAR2B,coding,chr7:106685093-106802256	ENSG00000001084.6,GCLC,coding,chr6:53362138-53481768	-0.0122156	24	0.71936
ENSG00000005302.12,MSL3,coding,chrX:11776277-11793870	ENSG00000005801.11,ZNF195,coding,chr11:3360490-3400448	0.632608	1	0.768588
ENSG00000005302.12,MSL3,coding,chrX:11776277-11793870	ENSG00000005889.10,ZFX,coding,chrX:24167289-24234372	0.583815	2	0.768588
ENSG00000005302.12,MSL3,coding,chrX:11776277-11793870	ENSG00000001629.5,ANKIB1,coding,chr7:91875547-92030698	0.581513	3	0.768588
ENSG00000005302.12,MSL3,coding,chrX:11776277-11793870	ENSG00000003509.11,C2orf56,coding,chr2:37458773-37480546	0.565879	4	0.768588
ENSG00000005302.12,MSL3,coding,chrX:11776277-11793870	ENSG00000000419.7,DPM1,coding,chr20:49551403-49575092	0.527364	5	0.768588
ENSG00000005302.12,MSL3,coding,chrX:11776277-11793870	ENSG00000004961.10,HCCS,coding,chrX:11129420-11141198	0.494309	6	0.768588
ENSG00000005302.12,MSL3,coding,chrX:11776277-11793870	ENSG00000000003.9,TSPAN6,coding,chrX:99883666-99894988	0.42325	7	0.768588
ENSG00000005302.12,MSL3,coding,chrX:11776277-11793870	ENSG00000001561.5,ENPP4,coding,chr6:46097700-46114435	0.391298	8	0.768588
ENSG00000005302.12,MSL3,coding,chrX:11776277-11793870	ENSG00000005059.11,CCDC109B,coding,chr4:110481360-110609874	0.361449	9	0.768588
ENSG00000005302.12,MSL3,coding,chrX:11776277-11793870	ENSG00000002330.8,BAD,coding,chr11:64037301-64052176	0.293897	10	0.768588
ENSG00000005302.12,MSL3,coding,chrX:11776277-11793870	ENSG00000003249.8,DBNDD1,coding,chr16:90071272-90086536	0.286573	11	0.768588
ENSG00000005302.12,MSL3,coding,chrX:11776277-11793870	ENSG00000137393.8,RNF144B,coding,chr6:18368778-18469105	0.255701	12	0.768588
ENSG00000005302.12,MSL3,coding,chrX:11776277-11793870	ENSG00000088538.10,DOCK3,coding,chr3:50712671-51421629	0.226407	13	0.768588
ENSG00000005302.12,MSL3,coding,chrX:11776277-11793870	ENSG00000011009.5,LYPLA2,coding,chr1:24117459-24122029	0.219046	14	0.768588
ENSG00000005302.12,MSL3,coding,chrX:11776277-11793870	ENSG00000007866.13,TEAD3,coding,chr6:35441373-35464861	0.204038	15	0.768588
ENSG00000005302.12,MSL3,coding,chrX:11776277-11793870	ENSG00000005102.8,MEOX1,coding,chr17:41717755-41739322	0.194184	16	0.768588
ENSG00000005302.12,MSL3,coding,chrX:11776277-11793870	ENSG00000001630.10,CYP51A1,coding,chr7:91741464-91772266	-0.148633	17	0.768588
ENSG00000005302.12,MSL3,coding,chrX:11776277-11793870	ENSG00000010818.4,HIVEP2,coding,chr6:143072603-143266338	0.127077	18	0.768588
ENSG00000005302.12,MSL3,coding,chrX:11776277-11793870	ENSG00000006704.6,GTF2IRD1,coding,chr7:73868119-74016931	0.0143535	19	0.768588
ENSG00000005339.6,CREBBP,coding,chr16:3775054-3930722	ENSG00000005810.12,MYCBP2,coding,chr13:77618791-77901185	0.519877	1	0.848391
ENSG00000005339.6,CREBBP,coding,chr16:3775054-3930722	ENSG00000003056.3,M6PR,coding,chr12:9092958-9102551	0.492121	2	0.848391
ENSG00000005339.6,CREBBP,coding,chr16:3775054-3930722	ENSG00000001630.10,CYP51A1,coding,chr7:91741464-91772266	0.484476	3	0.848391
ENSG00000005339.6,CREBBP,coding,chr16:3775054-3930722	ENSG00000023572.4,GLRX2,coding,chr1:193065597-193075244	-0.449516	4	0.848391
ENSG00000005339.6,CREBBP,coding,chr16:3775054-3930722	ENSG00000023318.7,ERP44,coding,chr9:102741460-102861322	-0.442273	5	0.848391
ENSG00000005339.6,CREBBP,coding,chr16:3775054-3930722	ENSG00000002330.8,BAD,coding,chr11:64037301-64052176	-0.437581	6	0.848391
ENSG00000005339.6,CREBBP,coding,chr16:3775054-3930722	ENSG00000033011.5,ALG1,coding,chr16:5083702-5135395	0.429181	7	0.848391
ENSG00000005339.6,CREBBP,coding,chr16:3775054-3930722	ENSG00000001167.10,NFYA,coding,chr6:41040683-41067715	0.395355	8	0.848391
ENSG00000005339.6,CREBBP,coding,chr16:3775054-3930722	ENSG00000008710.11,PKD1,coding,chr16:2138710-2185899	0.390216	9	0.848391
ENSG00000005339.6,CREBBP,coding,chr16:3775054-3930722	ENSG00000006625.11,GGCT,coding,chr7:30536236-30544460	-0.379541	10	0.848391
ENSG00000005339.6,CREBBP,coding,chr16:3775054-3930722	ENSG00000009413.10,REV3L,coding,chr6:111620233-111804918	0.361909	11	0.848391
ENSG00000005339.6,CREBBP,coding,chr16:3775054-3930722	ENSG00000039650.4,PNKP,coding,chr19:50364461-50370818	-0.343959	12	0.848391
ENSG00000005339.6,CREBBP,coding,chr16:3775054-3930722	ENSG00000001036.8,FUCA2,coding,chr6:143816613-143832827	-0.338924	13	0.848391
ENSG00000005339.6,CREBBP,coding,chr16:3775054-3930722	ENSG00000139218.12,SCAF11,coding,chr12:46312913-46385903	0.335344	14	0.848391
ENSG00000005339.6,CREBBP,coding,chr16:3775054-3930722	ENSG00000055208.12,TAB2,coding,chr6:149539776-149732749	0.310683	15	0.848391
ENSG00000005339.6,CREBBP,coding,chr16:3775054-3930722	ENSG00000011478.6,QPCTL,coding,chr19:46195740-46207240	-0.277273	16	0.848391
ENSG00000005339.6,CREBBP,coding,chr16:3775054-3930722	ENSG00000004139.8,SARM1,coding,chr17:26691377-26728046	0.271637	17	0.848391
ENSG00000005339.6,CREBBP,coding,chr16:3775054-3930722	ENSG00000007384.9,RHBDF1,coding,chr16:108057-126354	0.242816	18	0.848391
ENSG00000005339.6,CREBBP,coding,chr16:3775054-3930722	ENSG00000001617.7,SEMA3F,coding,chr3:50192477-50226508	0.239806	19	0.848391
ENSG00000005339.6,CREBBP,coding,chr16:3775054-3930722	ENSG00000007866.13,TEAD3,coding,chr6:35441373-35464861	0.235424	20	0.848391
ENSG00000005339.6,CREBBP,coding,chr16:3775054-3930722	ENSG00000001461.11,NIPAL3,coding,chr1:24742283-24799466	0.217086	21	0.848391
ENSG00000005339.6,CREBBP,coding,chr16:3775054-3930722	ENSG00000006194.5,ZNF263,coding,chr16:3313799-3341460	0.201175	22	0.848391
ENSG00000005339.6,CREBBP,coding,chr16:3775054-3930722	ENSG00000000457.8,SCYL3,coding,chr1:169821803-169863408	0.184411	23	0.848391
ENSG00000005339.6,CREBBP,coding,chr16:3775054-3930722	ENSG00000061794.7,MRPS35,coding,chr12:27863705-27909228	-0.178217	24	0.848391
ENSG00000005339.6,CREBBP,coding,chr16:3775054-3930722	ENSG00000013392.5,RWDD2A,coding,chr6:83903097-83906382	-0.140451	25	0.848391
ENSG00000005339.6,CREBBP,coding,chr16:3775054-3930722	ENSG00000012504.9,NR1H4,coding,chr12:100867485-100958191	-0.133147	26	0.848391
ENSG00000005339.6,CREBBP,coding,chr16:3775054-3930722	ENSG00000002016.11,RAD52,coding,chr12:1021242-1100356	0.124388	27	0.848391
ENSG00000005339.6,CREBBP,coding,chr16:3775054-3930722	ENSG00000006451.3,RALA,coding,chr7:39663081-39747723	-0.0919201	28	0.848391
ENSG00000005339.6,CREBBP,coding,chr16:3775054-3930722	ENSG00000007516.8,BAIAP3,coding,chr16:1383601-1399439	0.0917773	29	0.848391
ENSG00000005339.6,CREBBP,coding,chr16:3775054-3930722	ENSG00000003756.11,RBM5,coding,chr3:50126340-50156454	0.0719444	30	0.848391
ENSG00000005339.6,CREBBP,coding,chr16:3775054-3930722	ENSG00000011295.7,TTC19,coding,chr17:15902781-15948336	-0.0687104	31	0.848391
ENSG00000005379.10,BZRAP1,coding,chr17:56378597-56406152	ENSG00000002016.11,RAD52,coding,chr12:1021242-1100356	0.463101	1	0.698132
ENSG00000005379.10,BZRAP1,coding,chr17:56378597-56406152	ENSG00000118096.3,IFT46,coding,chr11:118415242-118443685	0.444657	2	0.698132
ENSG00000005379.10,BZRAP1,coding,chr17:56378597-56406152	ENSG00000011143.11,MKS1,coding,chr17:56282798-56296966	0.429331	3	0.698132
ENSG00000005379.10,BZRAP1,coding,chr17:56378597-56406152	ENSG00000137877.8,SPTBN5,coding,chr15:42140344-42186275	0.421691	4	0.698132
ENSG00000005379.10,BZRAP1,coding,chr17:56378597-56406152	ENSG00000004777.10,ARHGAP33,coding,chr19:36266416-36279724	0.371622	5	0.698132
ENSG00000005379.10,BZRAP1,coding,chr17:56378597-56406152	ENSG00000184432.4,COPB2,coding,chr3:139074441-139108574	-0.344604	6	0.698132
ENSG00000005379.10,BZRAP1,coding,chr17:56378597-56406152	ENSG00000063180.3,CA11,coding,chr19:49141271-49149451	0.294781	7	0.698132
ENSG00000005379.10,BZRAP1,coding,chr17:56378597-56406152	ENSG00000005801.11,ZNF195,coding,chr11:3360490-3400448	0.28861	8	0.698132
ENSG00000005379.10,BZRAP1,coding,chr17:56378597-56406152	ENSG00000004139.8,SARM1,coding,chr17:26691377-26728046	0.247581	9	0.698132
ENSG00000005379.10,BZRAP1,coding,chr17:56378597-56406152	ENSG00000001630.10,CYP51A1,coding,chr7:91741464-91772266	-0.24702	10	0.698132
ENSG00000005379.10,BZRAP1,coding,chr17:56378597-56406152	ENSG00000000003.9,TSPAN6,coding,chrX:99883666-99894988	0.234828	11	0.698132
ENSG00000005379.10,BZRAP1,coding,chr17:56378597-56406152	ENSG00000001617.7,SEMA3F,coding,chr3:50192477-50226508	0.233934	12	0.698132
ENSG00000005379.10,BZRAP1,coding,chr17:56378597-56406152	ENSG00000070759.11,TESK2,coding,chr1:45809554-45956872	0.229706	13	0.698132
ENSG00000005379.10,BZRAP1,coding,chr17:56378597-56406152	ENSG00000020922.7,MRE11A,coding,chr11:94152894-94227074	0.220114	14	0.698132
ENSG00000005379.10,BZRAP1,coding,chr17:56378597-56406152	ENSG00000006015.12,C19orf60,coding,chr19:18699494-18703146	0.208177	15	0.698132
ENSG00000005379.10,BZRAP1,coding,chr17:56378597-56406152	ENSG00000003137.4,CYP26B1,coding,chr2:72356366-72375167	0.186801	16	0.698132
ENSG00000005379.10,BZRAP1,coding,chr17:56378597-56406152	ENSG00000004478.5,FKBP4,coding,chr12:2904118-2914576	-0.183323	17	0.698132
ENSG00000005379.10,BZRAP1,coding,chr17:56378597-56406152	ENSG00000004975.6,DVL2,coding,chr17:7128659-7137868	0.166763	18	0.698132
ENSG00000005379.10,BZRAP1,coding,chr17:56378597-56406152	ENSG00000008018.7,PSMB1,coding,chr6:170844204-170862429	-0.15747	19	0.698132
ENSG00000005379.10,BZRAP1,coding,chr17:56378597-56406152	ENSG00000001631.9,KRIT1,coding,chr7:91828282-91875480	0.157229	20	0.698132
ENSG00000005379.10,BZRAP1,coding,chr17:56378597-56406152	ENSG00000000419.7,DPM1,coding,chr20:49551403-49575092	-0.0976051	21	0.698132
ENSG00000005379.10,BZRAP1,coding,chr17:56378597-56406152	ENSG00000000460.11,C1orf112,coding,chr1:169631244-169823221	0.0734443	22	0.698132
ENSG00000005381.5,MPO,coding,chr17:56347216-56358296	ENSG00000099957.11,P2RX6,coding,chr22:21369315-21383119	0.296755	1	0.223894
ENSG00000005381.5,MPO,coding,chr17:56347216-56358296	ENSG00000004776.5,HSPB6,coding,chr19:36245469-36247930	0.265205	2	0.223894
ENSG00000005381.5,MPO,coding,chr17:56347216-56358296	ENSG00000003137.4,CYP26B1,coding,chr2:72356366-72375167	0.261174	3	0.223894
ENSG00000005381.5,MPO,coding,chr17:56347216-56358296	ENSG00000007038.5,PRSS21,coding,chr16:2867163-2871720	0.255599	4	0.223894
ENSG00000005421.4,PON1,coding,chr7:94926987-95025673	ENSG00000105063.12,PPP6R1,coding,chr19:55741147-55770363	-0.326092	1	0.133084
ENSG00000005421.4,PON1,coding,chr7:94926987-95025673	ENSG00000000971.10,CFH,coding,chr1:196621007-196716634	0.196283	2	0.133084
ENSG00000005436.9,GCFC2,coding,chr2:75879125-75938115	ENSG00000004897.5,CDC27,coding,chr17:45195068-45266788	0.770775	1	0.83408
ENSG00000005436.9,GCFC2,coding,chr2:75879125-75938115	ENSG00000001631.9,KRIT1,coding,chr7:91828282-91875480	0.729849	2	0.83408
ENSG00000005436.9,GCFC2,coding,chr2:75879125-75938115	ENSG00000005700.10,IBTK,coding,chr6:82879699-82957471	0.725176	3	0.83408
ENSG00000005436.9,GCFC2,coding,chr2:75879125-75938115	ENSG00000006634.3,DBF4,coding,chr7:87505530-87538856	0.715317	4	0.83408
ENSG00000005436.9,GCFC2,coding,chr2:75879125-75938115	ENSG00000003509.11,C2orf56,coding,chr2:37458773-37480546	0.71089	5	0.83408
ENSG00000005436.9,GCFC2,coding,chr2:75879125-75938115	ENSG00000000419.7,DPM1,coding,chr20:49551403-49575092	0.644355	6	0.83408
ENSG00000005436.9,GCFC2,coding,chr2:75879125-75938115	ENSG00000001629.5,ANKIB1,coding,chr7:91875547-92030698	0.626964	7	0.83408
ENSG00000005436.9,GCFC2,coding,chr2:75879125-75938115	ENSG00000003393.10,ALS2,coding,chr2:202565276-202645912	0.521711	8	0.83408
ENSG00000005436.9,GCFC2,coding,chr2:75879125-75938115	ENSG00000008988.5,RPS20,coding,chr8:56979853-56987069	0.47308	9	0.83408
ENSG00000005436.9,GCFC2,coding,chr2:75879125-75938115	ENSG00000001036.8,FUCA2,coding,chr6:143816613-143832827	0.405407	10	0.83408
ENSG00000005436.9,GCFC2,coding,chr2:75879125-75938115	ENSG00000011523.8,CEP68,coding,chr2:65283499-65314138	0.381911	11	0.83408
ENSG00000005436.9,GCFC2,coding,chr2:75879125-75938115	ENSG00000000457.8,SCYL3,coding,chr1:169821803-169863408	0.366737	12	0.83408
ENSG00000005436.9,GCFC2,coding,chr2:75879125-75938115	ENSG00000001617.7,SEMA3F,coding,chr3:50192477-50226508	-0.360209	13	0.83408
ENSG00000005436.9,GCFC2,coding,chr2:75879125-75938115	ENSG00000004059.5,ARF5,coding,chr7:127228398-127231759	-0.34341	14	0.83408
ENSG00000005436.9,GCFC2,coding,chr2:75879125-75938115	ENSG00000000003.9,TSPAN6,coding,chrX:99883666-99894988	0.286964	15	0.83408
ENSG00000005436.9,GCFC2,coding,chr2:75879125-75938115	ENSG00000001630.10,CYP51A1,coding,chr7:91741464-91772266	-0.245627	16	0.83408
ENSG00000005436.9,GCFC2,coding,chr2:75879125-75938115	ENSG00000036672.9,USP2,coding,chr11:119225924-119252436	0.149781	17	0.83408
ENSG00000005436.9,GCFC2,coding,chr2:75879125-75938115	ENSG00000003056.3,M6PR,coding,chr12:9092958-9102551	-0.129911	18	0.83408
ENSG00000005436.9,GCFC2,coding,chr2:75879125-75938115	ENSG00000006128.7,TAC1,coding,chr7:97361219-97369784	0.064891	19	0.83408
ENSG00000005448.12,WDR54,coding,chr2:74648804-74652882	ENSG00000159239.7,C2orf81,coding,chr2:74641303-74648718	0.729473	1	0.871674
ENSG00000005448.12,WDR54,coding,chr2:74648804-74652882	ENSG00000010626.10,LRRC23,coding,chr12:6982732-7023407	0.725956	2	0.871674
ENSG00000005448.12,WDR54,coding,chr2:74648804-74652882	ENSG00000004838.9,ZMYND10,coding,chr3:50378540-50384283	0.675848	3	0.871674
ENSG00000005448.12,WDR54,coding,chr2:74648804-74652882	ENSG00000001460.12,C1orf201,coding,chr1:24683488-24743424	0.573054	4	0.871674
ENSG00000005448.12,WDR54,coding,chr2:74648804-74652882	ENSG00000011332.13,DPF1,coding,chr19:38701645-38720354	0.339706	5	0.871674
ENSG00000005448.12,WDR54,coding,chr2:74648804-74652882	ENSG00000000003.9,TSPAN6,coding,chrX:99883666-99894988	0.325965	6	0.871674
ENSG00000005448.12,WDR54,coding,chr2:74648804-74652882	ENSG00000001497.12,LAS1L,coding,chrX:64732461-64754655	0.294794	7	0.871674
ENSG00000005448.12,WDR54,coding,chr2:74648804-74652882	ENSG00000005379.10,BZRAP1,coding,chr17:56378597-56406152	0.292006	8	0.871674
ENSG00000005448.12,WDR54,coding,chr2:74648804-74652882	ENSG00000001629.5,ANKIB1,coding,chr7:91875547-92030698	-0.278398	9	0.871674
ENSG00000005448.12,WDR54,coding,chr2:74648804-74652882	ENSG00000056998.13,GYG2,coding,chrX:2746828-2800859	0.274374	10	0.871674
ENSG00000005448.12,WDR54,coding,chr2:74648804-74652882	ENSG00000003096.9,KLHL13,coding,chrX:117031775-117251303	0.264424	11	0.871674
ENSG00000005448.12,WDR54,coding,chr2:74648804-74652882	ENSG00000003436.10,TFPI,coding,chr2:188328956-188430487	-0.24658	12	0.871674
ENSG00000005448.12,WDR54,coding,chr2:74648804-74652882	ENSG00000000419.7,DPM1,coding,chr20:49551403-49575092	-0.24575	13	0.871674
ENSG00000005448.12,WDR54,coding,chr2:74648804-74652882	ENSG00000001036.8,FUCA2,coding,chr6:143816613-143832827	-0.237084	14	0.871674
ENSG00000005448.12,WDR54,coding,chr2:74648804-74652882	ENSG00000006459.6,JHDM1D,coding,chr7:139784545-139876835	-0.21042	15	0.871674
ENSG00000005448.12,WDR54,coding,chr2:74648804-74652882	ENSG00000005302.12,MSL3,coding,chrX:11776277-11793870	-0.165999	16	0.871674
ENSG00000005448.12,WDR54,coding,chr2:74648804-74652882	ENSG00000067057.10,PFKP,coding,chr10:3109711-3179904	0.157692	17	0.871674
ENSG00000005448.12,WDR54,coding,chr2:74648804-74652882	ENSG00000001561.5,ENPP4,coding,chr6:46097700-46114435	-0.119824	18	0.871674
ENSG00000005448.12,WDR54,coding,chr2:74648804-74652882	ENSG00000001461.11,NIPAL3,coding,chr1:24742283-24799466	-0.113307	19	0.871674
ENSG00000005448.12,WDR54,coding,chr2:74648804-74652882	ENSG00000014138.4,POLA2,coding,chr11:65029232-65073060	0.0982668	20	0.871674
ENSG00000005448.12,WDR54,coding,chr2:74648804-74652882	ENSG00000171385.5,KCND3,coding,chr1:112313283-112531777	-0.0278704	21	0.871674
ENSG00000005448.12,WDR54,coding,chr2:74648804-74652882	ENSG00000067992.8,PDK3,coding,chrX:24483337-24557954	-0.0154034	22	0.871674
ENSG00000005448.12,WDR54,coding,chr2:74648804-74652882	ENSG00000102302.7,FGD1,coding,chrX:54471886-54522599	0.00781328	23	0.871674
ENSG00000005448.12,WDR54,coding,chr2:74648804-74652882	ENSG00000002549.7,LAP3,coding,chr4:17578814-17609595	-0.00767168	24	0.871674
ENSG00000005469.7,CROT,coding,chr7:86974996-87029111	ENSG00000182165.12,TP53TG1,lncRNA,chr7:86954540-86974831	0.680169	1	0.802946
ENSG00000005469.7,CROT,coding,chr7:86974996-87029111	ENSG00000001629.5,ANKIB1,coding,chr7:91875547-92030698	0.498024	2	0.802946
ENSG00000005469.7,CROT,coding,chr7:86974996-87029111	ENSG00000125962.7,ARMCX5,coding,chrX:101854095-101969594	0.471527	3	0.802946
ENSG00000005469.7,CROT,coding,chr7:86974996-87029111	ENSG00000176273.9,SLC35G1,coding,chr10:95653729-95715819	0.363746	4	0.802946
ENSG00000005469.7,CROT,coding,chr7:86974996-87029111	ENSG00000164309.10,CMYA5,coding,chr5:78985699-79096063	0.355701	5	0.802946
ENSG00000005469.7,CROT,coding,chr7:86974996-87029111	ENSG00000115970.12,THADA,coding,chr2:43393799-43823185	0.346754	6	0.802946
ENSG00000005469.7,CROT,coding,chr7:86974996-87029111	ENSG00000166946.8,CCNDBP1,coding,chr15:43477315-43487396	0.334618	7	0.802946
ENSG00000005469.7,CROT,coding,chr7:86974996-87029111	ENSG00000000457.8,SCYL3,coding,chr1:169821803-169863408	0.333465	8	0.802946
ENSG00000005469.7,CROT,coding,chr7:86974996-87029111	ENSG00000004139.8,SARM1,coding,chr17:26691377-26728046	0.313781	9	0.802946
ENSG00000005469.7,CROT,coding,chr7:86974996-87029111	ENSG00000000971.10,CFH,coding,chr1:196621007-196716634	0.245164	10	0.802946
ENSG00000005469.7,CROT,coding,chr7:86974996-87029111	ENSG00000000003.9,TSPAN6,coding,chrX:99883666-99894988	0.168952	11	0.802946
ENSG00000005469.7,CROT,coding,chr7:86974996-87029111	ENSG00000002330.8,BAD,coding,chr11:64037301-64052176	0.153531	12	0.802946
ENSG00000005469.7,CROT,coding,chr7:86974996-87029111	ENSG00000261452.1,RP11-509E16.1.1,lncRNA,chr2:25380062-25382006	0.0748539	13	0.802946
ENSG00000005469.7,CROT,coding,chr7:86974996-87029111	ENSG00000002549.7,LAP3,coding,chr4:17578814-17609595	-0.0727083	14	0.802946
ENSG00000005469.7,CROT,coding,chr7:86974996-87029111	ENSG00000005075.11,POLR2J,coding,chr7:102113564-102119354	0.0715794	15	0.802946
ENSG00000005469.7,CROT,coding,chr7:86974996-87029111	ENSG00000185482.3,STAC3,coding,chr12:57637235-57644976	-0.0243362	16	0.802946
ENSG00000005471.11,ABCB4,coding,chr7:87031012-87109751	ENSG00000120708.9,TGFBI,coding,chr5:135364583-135399507	0.425107	1	0.479636
ENSG00000005471.11,ABCB4,coding,chr7:87031012-87109751	ENSG00000006468.9,ETV1,coding,chr7:13930852-14031050	0.41422	2	0.479636
ENSG00000005471.11,ABCB4,coding,chr7:87031012-87109751	ENSG00000000971.10,CFH,coding,chr1:196621007-196716634	0.342861	3	0.479636
ENSG00000005471.11,ABCB4,coding,chr7:87031012-87109751	ENSG00000149289.6,ZC3H12C,coding,chr11:109964086-110042566	0.312711	4	0.479636
ENSG00000005471.11,ABCB4,coding,chr7:87031012-87109751	ENSG00000002745.7,WNT16,coding,chr7:120965420-120981158	0.289408	5	0.479636
ENSG00000005471.11,ABCB4,coding,chr7:87031012-87109751	ENSG00000068137.9,PLEKHH3,coding,chr17:40819934-40829048	-0.279726	6	0.479636
ENSG00000005471.11,ABCB4,coding,chr7:87031012-87109751	ENSG00000034152.13,MAP2K3,coding,chr17:21187983-21218552	-0.27115	7	0.479636
ENSG00000005471.11,ABCB4,coding,chr7:87031012-87109751	ENSG00000004455.11,AK2,coding,chr1:33473584-33546597	-0.264606	8	0.479636
ENSG00000005471.11,ABCB4,coding,chr7:87031012-87109751	ENSG00000000938.7,FGR,coding,chr1:27938574-27961788	0.245481	9	0.479636
ENSG00000005483.13,MLL5,coding,chr7:104654625-104754808	ENSG00000058272.10,PPP1R12A,coding,chr12:80167342-80329240	0.555854	1	0.681947
ENSG00000005483.13,MLL5,coding,chr7:104654625-104754808	ENSG00000001629.5,ANKIB1,coding,chr7:91875547-92030698	0.553806	2	0.681947
ENSG00000005483.13,MLL5,coding,chr7:104654625-104754808	ENSG00000009954.6,BAZ1B,coding,chr7:72854727-72936608	0.55191	3	0.681947
ENSG00000005483.13,MLL5,coding,chr7:104654625-104754808	ENSG00000001167.10,NFYA,coding,chr6:41040683-41067715	0.443137	4	0.681947
ENSG00000005483.13,MLL5,coding,chr7:104654625-104754808	ENSG00000000457.8,SCYL3,coding,chr1:169821803-169863408	0.383408	5	0.681947
ENSG00000005483.13,MLL5,coding,chr7:104654625-104754808	ENSG00000006459.6,JHDM1D,coding,chr7:139784545-139876835	0.376422	6	0.681947
ENSG00000005483.13,MLL5,coding,chr7:104654625-104754808	ENSG00000005955.7,GGNBP2,coding,chr17:34900772-34946278	0.357519	7	0.681947
ENSG00000005483.13,MLL5,coding,chr7:104654625-104754808	ENSG00000005339.6,CREBBP,coding,chr16:3775054-3930722	0.355075	8	0.681947
ENSG00000005483.13,MLL5,coding,chr7:104654625-104754808	ENSG00000004975.6,DVL2,coding,chr17:7128659-7137868	0.334837	9	0.681947
ENSG00000005483.13,MLL5,coding,chr7:104654625-104754808	ENSG00000064419.9,TNPO3,coding,chr7:128594947-128695198	0.334166	10	0.681947
ENSG00000005483.13,MLL5,coding,chr7:104654625-104754808	ENSG00000000419.7,DPM1,coding,chr20:49551403-49575092	0.201796	11	0.681947
ENSG00000005483.13,MLL5,coding,chr7:104654625-104754808	ENSG00000083099.6,LYRM2,coding,chr6:90277862-90348472	0.188467	12	0.681947
ENSG00000005483.13,MLL5,coding,chr7:104654625-104754808	ENSG00000004779.4,NDUFAB1,coding,chr16:23592322-23607677	-0.164147	13	0.681947
ENSG00000005483.13,MLL5,coding,chr7:104654625-104754808	ENSG00000007402.7,CACNA2D2,coding,chr3:50400232-50541675	0.159347	14	0.681947
ENSG00000005483.13,MLL5,coding,chr7:104654625-104754808	ENSG00000005075.11,POLR2J,coding,chr7:102113564-102119354	-0.105212	15	0.681947
ENSG00000005483.13,MLL5,coding,chr7:104654625-104754808	ENSG00000004660.9,CAMKK1,coding,chr17:3763608-3796338	0.0802434	16	0.681947
ENSG00000005486.10,RHBDD2,coding,chr7:75471919-75518244	ENSG00000127948.9,POR,coding,chr7:75528517-75616173	0.590497	1	0.722148
ENSG00000005486.10,RHBDD2,coding,chr7:75471919-75518244	ENSG00000004059.5,ARF5,coding,chr7:127228398-127231759	0.465205	2	0.722148
ENSG00000005486.10,RHBDD2,coding,chr7:75471919-75518244	ENSG00000000419.7,DPM1,coding,chr20:49551403-49575092	-0.40673	3	0.722148
ENSG00000005486.10,RHBDD2,coding,chr7:75471919-75518244	ENSG00000077454.10,LRCH4,coding,chr7:100169854-100183776	0.354243	4	0.722148
ENSG00000005486.10,RHBDD2,coding,chr7:75471919-75518244	ENSG00000001617.7,SEMA3F,coding,chr3:50192477-50226508	0.347429	5	0.722148
ENSG00000005486.10,RHBDD2,coding,chr7:75471919-75518244	ENSG00000116459.6,ATP5F1,coding,chr1:111991485-112005395	-0.29157	6	0.722148
ENSG00000005486.10,RHBDD2,coding,chr7:75471919-75518244	ENSG00000068724.10,TTC7A,coding,chr2:47143295-47303276	0.282365	7	0.722148
ENSG00000005486.10,RHBDD2,coding,chr7:75471919-75518244	ENSG00000000457.8,SCYL3,coding,chr1:169821803-169863408	-0.27881	8	0.722148
ENSG00000005486.10,RHBDD2,coding,chr7:75471919-75518244	ENSG00000003436.10,TFPI,coding,chr2:188328956-188430487	-0.248212	9	0.722148
ENSG00000005486.10,RHBDD2,coding,chr7:75471919-75518244	ENSG00000005187.7,ACSM3,coding,chr16:20621564-20808903	-0.235973	10	0.722148
[truncated: 505,071+ more rows]
