# Supplementary material for: Cancer-Related Triplets of mRNA-lncRNA-miRNA Revealed by Integrative Network in Uterine Corpus Endometrial Carcinoma
Source: Biomed Res Int. 2017 Feb 8;2017:3859582. doi: 10.1155/2017/3859582 (PMC5320387; doi:10.1155/2017/3859582)
Supplement: Supplementary file 1 — Supplementary Material S1 Regulatory relations of the factors in constructed network. Supplementary Material S2 The triplet list for mRNA-lncRNA-miRNA cross-regulation. [file 3859582.f1.zip › FileS2.xlsx]

## Sheet: CLM.cliques
coding GENCODE11ID	coding Symbol	coding Class	coding Position	lncRNA GENCODE11ID	lncRNA Symbol	lncRNA Class	lncRNA Position	miRNA GENCODE11ID	miRNA Symbol	miRNA Class	miRNA Position
ENSG00000000419.7	DPM1	coding	chr20:49551403-49575092	ENSG00000249982.1	RP11-1018N14.3.1	lncRNA	chr17:49410039-49411451	ENSG00000207935.1	MIR204	miRNA	chr9:73424890-73425000
ENSG00000001460.12	C1orf201	coding	chr1:24683488-24743424	ENSG00000238189.1	ENOX1-AS2	lncRNA	chr13:44032600-44033259	ENSG00000221493.1	MIR320C1	miRNA	chr18:19263470-19263558
ENSG00000005379.10	BZRAP1	coding	chr17:56378597-56406152	ENSG00000249941.1	CTD-2046I8.1.1	lncRNA	chr5:4866633-4874872	ENSG00000221737.1	MIR548I1	miRNA	chr3:125509246-125509395
ENSG00000000005.5	TNMD	coding	chrX:99839798-99854882	ENSG00000251628.1	RP11-371M22.1.1	lncRNA	chr5:113391702-113392871	ENSG00000208035.1	MIR143	miRNA	chr5:148808480-148808586
ENSG00000002822.9	MAD1L1	coding	chr7:1855382-2272878	ENSG00000224922.1	AL050303.7.1	lncRNA	chr21:15142252-15144061	ENSG00000207551.1	MIR608	miRNA	chr10:102734741-102734841
ENSG00000002822.9	MAD1L1	coding	chr7:1855382-2272878	ENSG00000236572.1	AC006369.3.1	lncRNA	chr2:37971475-37974189	ENSG00000207551.1	MIR608	miRNA	chr10:102734741-102734841
ENSG00000002822.9	MAD1L1	coding	chr7:1855382-2272878	ENSG00000227564.1	RP11-527N12.1.1	lncRNA	chr13:63757233-63801189	ENSG00000207551.1	MIR608	miRNA	chr10:102734741-102734841
ENSG00000000003.9	TSPAN6	coding	chrX:99883666-99894988	ENSG00000225427.1	LINC00331	lncRNA	chr13:79361453-79366442	ENSG00000207997.1	MIR644A	miRNA	chr20:33054129-33054223
ENSG00000000003.9	TSPAN6	coding	chrX:99883666-99894988	ENSG00000228538.1	AC009411.1.1	lncRNA	chr2:21861302-21872435	ENSG00000207997.1	MIR644A	miRNA	chr20:33054129-33054223
ENSG00000000003.9	TSPAN6	coding	chrX:99883666-99894988	ENSG00000236758.1	MTUS2-AS2	lncRNA	chr13:29813515-29824691	ENSG00000207997.1	MIR644A	miRNA	chr20:33054129-33054223
ENSG00000000003.9	TSPAN6	coding	chrX:99883666-99894988	ENSG00000251213.1	RP11-248N22.2.1	lncRNA	chr4:175085591-175090064	ENSG00000207997.1	MIR644A	miRNA	chr20:33054129-33054223
ENSG00000000003.9	TSPAN6	coding	chrX:99883666-99894988	ENSG00000257640.1	RP11-570L15.2.1	lncRNA	chr2:144053154-144329674	ENSG00000207997.1	MIR644A	miRNA	chr20:33054129-33054223
ENSG00000000003.9	TSPAN6	coding	chrX:99883666-99894988	ENSG00000253143.1	RP11-333A23.3.1	lncRNA	chr8:71383346-71392858	ENSG00000207997.1	MIR644A	miRNA	chr20:33054129-33054223
ENSG00000000003.9	TSPAN6	coding	chrX:99883666-99894988	ENSG00000236436.1	AC012361.1.1	lncRNA	chr2:21059530-21061421	ENSG00000207577.1	MIR587	miRNA	chr6:107231999-107232095
ENSG00000000003.9	TSPAN6	coding	chrX:99883666-99894988	ENSG00000236436.1	AC012361.1.1	lncRNA	chr2:21059530-21061421	ENSG00000198984.1	MIR345	miRNA	chr14:100774195-100774293
ENSG00000000003.9	TSPAN6	coding	chrX:99883666-99894988	ENSG00000236436.1	AC012361.1.1	lncRNA	chr2:21059530-21061421	ENSG00000221333.1	MIR548K	miRNA	chr11:70130060-70130176
ENSG00000000003.9	TSPAN6	coding	chrX:99883666-99894988	ENSG00000197644.2	AC106870.2.1	lncRNA	chr2:30122462-30130065	ENSG00000207723.1	MIR519A2	miRNA	chr19:54265597-54265684
ENSG00000000003.9	TSPAN6	coding	chrX:99883666-99894988	ENSG00000242569.1	BX004987.3.1	lncRNA	chr1:143347957-143379903	ENSG00000207568.1	MIR203	miRNA	chr14:104583741-104583851
ENSG00000000003.9	TSPAN6	coding	chrX:99883666-99894988	ENSG00000260543.1	RP4-668E10.1.1	lncRNA	chr7:9136900-9229395	ENSG00000207568.1	MIR203	miRNA	chr14:104583741-104583851
ENSG00000000003.9	TSPAN6	coding	chrX:99883666-99894988	ENSG00000230575.1	RP11-369F10.2.1	lncRNA	chr10:78197165-78198533	ENSG00000207568.1	MIR203	miRNA	chr14:104583741-104583851
ENSG00000000003.9	TSPAN6	coding	chrX:99883666-99894988	ENSG00000215881.3	RP11-65D24.1.1	lncRNA	chr13:112248355-112294426	ENSG00000207551.1	MIR608	miRNA	chr10:102734741-102734841
ENSG00000000003.9	TSPAN6	coding	chrX:99883666-99894988	ENSG00000254516.1	RP11-159D8.1.1	lncRNA	chr11:37960150-37976213	ENSG00000207551.1	MIR608	miRNA	chr10:102734741-102734841
ENSG00000000003.9	TSPAN6	coding	chrX:99883666-99894988	ENSG00000236193.1	AC079610.1.1	lncRNA	chr2:214020529-214032436	ENSG00000207551.1	MIR608	miRNA	chr10:102734741-102734841
ENSG00000000003.9	TSPAN6	coding	chrX:99883666-99894988	ENSG00000226829.1	RP5-945F2.3.1	lncRNA	chr7:67615269-67753220	ENSG00000207551.1	MIR608	miRNA	chr10:102734741-102734841
ENSG00000000003.9	TSPAN6	coding	chrX:99883666-99894988	ENSG00000229925.1	AP001043.1.1	lncRNA	chr21:40260695-40275829	ENSG00000207551.1	MIR608	miRNA	chr10:102734741-102734841
ENSG00000000003.9	TSPAN6	coding	chrX:99883666-99894988	ENSG00000255808.1	RP11-31L22.3.1	lncRNA	chr11:72354280-72370451	ENSG00000207551.1	MIR608	miRNA	chr10:102734741-102734841
ENSG00000000003.9	TSPAN6	coding	chrX:99883666-99894988	ENSG00000229957.1	RP5-998H6.2.1	lncRNA	chr20:44797042-44799876	ENSG00000207551.1	MIR608	miRNA	chr10:102734741-102734841
ENSG00000000003.9	TSPAN6	coding	chrX:99883666-99894988	ENSG00000251125.1	CTD-2335O3.3.1	lncRNA	chr5:50746991-50757923	ENSG00000207551.1	MIR608	miRNA	chr10:102734741-102734841
ENSG00000000003.9	TSPAN6	coding	chrX:99883666-99894988	ENSG00000237031.1	AC008067.2.1	lncRNA	chr2:80802237-80843663	ENSG00000207551.1	MIR608	miRNA	chr10:102734741-102734841
ENSG00000000003.9	TSPAN6	coding	chrX:99883666-99894988	ENSG00000223726.1	CTA-929C8.7.1	lncRNA	chr22:27703443-27714499	ENSG00000207551.1	MIR608	miRNA	chr10:102734741-102734841
ENSG00000000003.9	TSPAN6	coding	chrX:99883666-99894988	ENSG00000251293.1	CTC-552D5.1.1	lncRNA	chr5:119581142-119669197	ENSG00000207551.1	MIR608	miRNA	chr10:102734741-102734841
ENSG00000000003.9	TSPAN6	coding	chrX:99883666-99894988	ENSG00000259135.1	RP11-671J11.4.1	lncRNA	chr14:35025979-35030504	ENSG00000207551.1	MIR608	miRNA	chr10:102734741-102734841
ENSG00000000003.9	TSPAN6	coding	chrX:99883666-99894988	ENSG00000228608.1	RP3-399C22.1.1	lncRNA	chr20:59049458-59055732	ENSG00000207802.1	MIR646	miRNA	chr20:58883531-58883625
ENSG00000000003.9	TSPAN6	coding	chrX:99883666-99894988	ENSG00000225427.1	LINC00331	lncRNA	chr13:79361453-79366442	ENSG00000207802.1	MIR646	miRNA	chr20:58883531-58883625
ENSG00000000003.9	TSPAN6	coding	chrX:99883666-99894988	ENSG00000251213.1	RP11-248N22.2.1	lncRNA	chr4:175085591-175090064	ENSG00000207802.1	MIR646	miRNA	chr20:58883531-58883625
ENSG00000000003.9	TSPAN6	coding	chrX:99883666-99894988	ENSG00000228608.1	RP3-399C22.1.1	lncRNA	chr20:59049458-59055732	ENSG00000207577.1	MIR587	miRNA	chr6:107231999-107232095
ENSG00000000003.9	TSPAN6	coding	chrX:99883666-99894988	ENSG00000225427.1	LINC00331	lncRNA	chr13:79361453-79366442	ENSG00000198984.1	MIR345	miRNA	chr14:100774195-100774293
ENSG00000000003.9	TSPAN6	coding	chrX:99883666-99894988	ENSG00000225525.1	RP11-236B18.3.1	lncRNA	chr10:92720832-92757505	ENSG00000198984.1	MIR345	miRNA	chr14:100774195-100774293
ENSG00000000003.9	TSPAN6	coding	chrX:99883666-99894988	ENSG00000248890.1	RP11-291L15.2.1	lncRNA	chr4:145564073-145582509	ENSG00000221333.1	MIR548K	miRNA	chr11:70130060-70130176
ENSG00000000003.9	TSPAN6	coding	chrX:99883666-99894988	ENSG00000224347.1	SCEL-AS1	lncRNA	chr13:78173889-78180686	ENSG00000198984.1	MIR345	miRNA	chr14:100774195-100774293
ENSG00000000003.9	TSPAN6	coding	chrX:99883666-99894988	ENSG00000261715.1	RP11-653G8.2.1	lncRNA	chr18:37646249-37679197	ENSG00000207723.1	MIR519A2	miRNA	chr19:54265597-54265684
ENSG00000000003.9	TSPAN6	coding	chrX:99883666-99894988	ENSG00000230051.1	CTA-929C8.8.1	lncRNA	chr22:27727747-27775226	ENSG00000198984.1	MIR345	miRNA	chr14:100774195-100774293
ENSG00000000003.9	TSPAN6	coding	chrX:99883666-99894988	ENSG00000251213.1	RP11-248N22.2.1	lncRNA	chr4:175085591-175090064	ENSG00000198984.1	MIR345	miRNA	chr14:100774195-100774293
ENSG00000000003.9	TSPAN6	coding	chrX:99883666-99894988	ENSG00000260322.1	RP11-339A11.2.1	lncRNA	chr1:80580627-80582603	ENSG00000221333.1	MIR548K	miRNA	chr11:70130060-70130176
ENSG00000000003.9	TSPAN6	coding	chrX:99883666-99894988	ENSG00000239946.1	ZBTB20-AS3	lncRNA	chr3:114591960-114595361	ENSG00000221760.1	MIR548J	miRNA	chr22:26951177-26951289
ENSG00000000971.10	CFH	coding	chr1:196621007-196716634	ENSG00000249281.1	AC093484.6.1	lncRNA	chr17:16285880-16287220	ENSG00000207568.1	MIR203	miRNA	chr14:104583741-104583851
ENSG00000000971.10	CFH	coding	chr1:196621007-196716634	ENSG00000225588.2	AC096669.1.1	lncRNA	chr2:107978737-108023785	ENSG00000207568.1	MIR203	miRNA	chr14:104583741-104583851
ENSG00000000971.10	CFH	coding	chr1:196621007-196716634	ENSG00000261128.1	RP11-18F14.2.1	lncRNA	chr16:80631802-80636416	ENSG00000207568.1	MIR203	miRNA	chr14:104583741-104583851
ENSG00000006377.9	DLX6	coding	chr7:96634859-96640351	ENSG00000238022.1	RP11-38C18.3.1	lncRNA	chr1:165185216-165188341	ENSG00000221264.1	MIR1284	miRNA	chr3:71591120-71591240
ENSG00000006377.9	DLX6	coding	chr7:96634859-96640351	ENSG00000235356.1	RP11-428G2.1.1	lncRNA	chr10:67073542-67074728	ENSG00000221264.1	MIR1284	miRNA	chr3:71591120-71591240
ENSG00000006377.9	DLX6	coding	chr7:96634859-96640351	ENSG00000258028.1	RP11-148E17.1.1	lncRNA	chr14:29406094-29497969	ENSG00000221264.1	MIR1284	miRNA	chr3:71591120-71591240
ENSG00000006377.9	DLX6	coding	chr7:96634859-96640351	ENSG00000253753.1	AC145123.2.1	lncRNA	chr8:143719948-143722027	ENSG00000221264.1	MIR1284	miRNA	chr3:71591120-71591240
ENSG00000090402.3	SI	coding	chr3:164696685-164796283	ENSG00000249403.1	CTC-281M20.4.1	lncRNA	chr5:174413297-174414053	ENSG00000199059.1	MIR135B	miRNA	chr1:205417429-205417526
ENSG00000090402.3	SI	coding	chr3:164696685-164796283	ENSG00000248753.1	CTC-276P9.2.1	lncRNA	chr5:134456215-134475371	ENSG00000199059.1	MIR135B	miRNA	chr1:205417429-205417526
ENSG00000090402.3	SI	coding	chr3:164696685-164796283	ENSG00000250242.1	RP11-438C19.1.1	lncRNA	chr5:114423588-114424172	ENSG00000199059.1	MIR135B	miRNA	chr1:205417429-205417526
ENSG00000090402.3	SI	coding	chr3:164696685-164796283	ENSG00000249837.1	CTD-2325B11.1.1	lncRNA	chr4:125070531-125173199	ENSG00000199059.1	MIR135B	miRNA	chr1:205417429-205417526
ENSG00000090402.3	SI	coding	chr3:164696685-164796283	ENSG00000235491.1	AC097499.1.1	lncRNA	chr2:126468545-126523419	ENSG00000199059.1	MIR135B	miRNA	chr1:205417429-205417526
ENSG00000090402.3	SI	coding	chr3:164696685-164796283	ENSG00000227364.1	AC018685.2.1	lncRNA	chr2:2733679-2734729	ENSG00000199059.1	MIR135B	miRNA	chr1:205417429-205417526
ENSG00000090402.3	SI	coding	chr3:164696685-164796283	ENSG00000224190.1	RP11-442O18.2.1	lncRNA	chr10:130711142-130714535	ENSG00000199059.1	MIR135B	miRNA	chr1:205417429-205417526
ENSG00000090402.3	SI	coding	chr3:164696685-164796283	ENSG00000257837.1	RP11-263K4.4.1	lncRNA	chr12:82898989-82899967	ENSG00000199059.1	MIR135B	miRNA	chr1:205417429-205417526
ENSG00000105793.10	GTPBP10	coding	chr7:89964536-90020769	ENSG00000249941.1	CTD-2046I8.1.1	lncRNA	chr5:4866633-4874872	ENSG00000221737.1	MIR548I1	miRNA	chr3:125509246-125509395
ENSG00000006468.9	ETV1	coding	chr7:13930852-14031050	ENSG00000249281.1	AC093484.6.1	lncRNA	chr17:16285880-16287220	ENSG00000207568.1	MIR203	miRNA	chr14:104583741-104583851
ENSG00000006468.9	ETV1	coding	chr7:13930852-14031050	ENSG00000230575.1	RP11-369F10.2.1	lncRNA	chr10:78197165-78198533	ENSG00000207568.1	MIR203	miRNA	chr14:104583741-104583851
ENSG00000006757.7	PNPLA4	coding	chrX:7866287-7895780	ENSG00000244576.1	AC090505.3.1	lncRNA	chr3:194489534-194500387	ENSG00000222071.1	MIR1915	miRNA	chr10:21785490-21785570
ENSG00000006757.7	PNPLA4	coding	chrX:7866287-7895780	ENSG00000231082.1	RP11-514F8.2.1	lncRNA	chr10:82409552-82413488	ENSG00000222071.1	MIR1915	miRNA	chr10:21785490-21785570
ENSG00000014257.11	ACPP	coding	chr3:132036210-132087142	ENSG00000225427.1	LINC00331	lncRNA	chr13:79361453-79366442	ENSG00000207997.1	MIR644A	miRNA	chr20:33054129-33054223
ENSG00000014257.11	ACPP	coding	chr3:132036210-132087142	ENSG00000251213.1	RP11-248N22.2.1	lncRNA	chr4:175085591-175090064	ENSG00000207997.1	MIR644A	miRNA	chr20:33054129-33054223
ENSG00000149133.1	OR5F1	coding	chr11:55761156-55762101	ENSG00000231040.1	AC103881.1.1	lncRNA	chr2:147595316-147607878	ENSG00000207997.1	MIR644A	miRNA	chr20:33054129-33054223
ENSG00000182634.7	OR10G7	coding	chr11:123908772-123909717	ENSG00000231040.1	AC103881.1.1	lncRNA	chr2:147595316-147607878	ENSG00000207997.1	MIR644A	miRNA	chr20:33054129-33054223
ENSG00000186117.2	OR5L1	coding	chr11:55578853-55579952	ENSG00000231040.1	AC103881.1.1	lncRNA	chr2:147595316-147607878	ENSG00000207997.1	MIR644A	miRNA	chr20:33054129-33054223
ENSG00000144061.8	NPHP1	coding	chr2:110879887-110962643	ENSG00000225427.1	LINC00331	lncRNA	chr13:79361453-79366442	ENSG00000207997.1	MIR644A	miRNA	chr20:33054129-33054223
ENSG00000144061.8	NPHP1	coding	chr2:110879887-110962643	ENSG00000251213.1	RP11-248N22.2.1	lncRNA	chr4:175085591-175090064	ENSG00000207997.1	MIR644A	miRNA	chr20:33054129-33054223
ENSG00000149133.1	OR5F1	coding	chr11:55761156-55762101	ENSG00000226053.1	RP5-1070A16.1.1	lncRNA	chr1:98676302-98738214	ENSG00000207997.1	MIR644A	miRNA	chr20:33054129-33054223
ENSG00000149133.1	OR5F1	coding	chr11:55761156-55762101	ENSG00000227090.1	AP000402.3.1	lncRNA	chr21:26258989-26275070	ENSG00000207997.1	MIR644A	miRNA	chr20:33054129-33054223
ENSG00000149133.1	OR5F1	coding	chr11:55761156-55762101	ENSG00000228795.1	RP11-436F21.3.1	lncRNA	chr9:106006007-106015452	ENSG00000207997.1	MIR644A	miRNA	chr20:33054129-33054223
ENSG00000149133.1	OR5F1	coding	chr11:55761156-55762101	ENSG00000229379.1	AC006041.1.1	lncRNA	chr7:15880921-15881985	ENSG00000207997.1	MIR644A	miRNA	chr20:33054129-33054223
ENSG00000149133.1	OR5F1	coding	chr11:55761156-55762101	ENSG00000227181.1	RP11-317P15.3.1	lncRNA	chr1:182681996-182683679	ENSG00000207997.1	MIR644A	miRNA	chr20:33054129-33054223
ENSG00000149133.1	OR5F1	coding	chr11:55761156-55762101	ENSG00000250865.1	RP11-780O17.1.1	lncRNA	chr4:136713538-136727059	ENSG00000207997.1	MIR644A	miRNA	chr20:33054129-33054223
ENSG00000149133.1	OR5F1	coding	chr11:55761156-55762101	ENSG00000238212.1	AC005863.2.1	lncRNA	chr17:14741278-14803871	ENSG00000207997.1	MIR644A	miRNA	chr20:33054129-33054223
ENSG00000149133.1	OR5F1	coding	chr11:55761156-55762101	ENSG00000254456.1	RP11-405K6.1.1	lncRNA	chr11:25756316-25803305	ENSG00000207997.1	MIR644A	miRNA	chr20:33054129-33054223
ENSG00000149133.1	OR5F1	coding	chr11:55761156-55762101	ENSG00000237312.1	RP11-475C16.2.1	lncRNA	chr6:153625729-153630117	ENSG00000207997.1	MIR644A	miRNA	chr20:33054129-33054223
ENSG00000149133.1	OR5F1	coding	chr11:55761156-55762101	ENSG00000253143.1	RP11-333A23.3.1	lncRNA	chr8:71383346-71392858	ENSG00000207997.1	MIR644A	miRNA	chr20:33054129-33054223
ENSG00000149133.1	OR5F1	coding	chr11:55761156-55762101	ENSG00000229437.1	LINC00366	lncRNA	chr13:39150776-39153131	ENSG00000207997.1	MIR644A	miRNA	chr20:33054129-33054223
ENSG00000149133.1	OR5F1	coding	chr11:55761156-55762101	ENSG00000259912.1	CTC-527H23.2.1	lncRNA	chr16:48654229-48655944	ENSG00000207997.1	MIR644A	miRNA	chr20:33054129-33054223
ENSG00000029993.10	HMGB3	coding	chrX:150148981-150159248	ENSG00000225427.1	LINC00331	lncRNA	chr13:79361453-79366442	ENSG00000207997.1	MIR644A	miRNA	chr20:33054129-33054223
ENSG00000029993.10	HMGB3	coding	chrX:150148981-150159248	ENSG00000251213.1	RP11-248N22.2.1	lncRNA	chr4:175085591-175090064	ENSG00000207997.1	MIR644A	miRNA	chr20:33054129-33054223
ENSG00000147885.2	IFNA16	coding	chr9:21216371-21217310	ENSG00000228391.1	AC011995.3.1	lncRNA	chr2:2874329-2875003	ENSG00000207997.1	MIR644A	miRNA	chr20:33054129-33054223
ENSG00000186117.2	OR5L1	coding	chr11:55578853-55579952	ENSG00000235717.1	AC068542.2.1	lncRNA	chr2:115591406-115593165	ENSG00000207997.1	MIR644A	miRNA	chr20:33054129-33054223
ENSG00000255332.1	RP11-201M22.1.1	coding	chr11:91528472-91545460	ENSG00000235717.1	AC068542.2.1	lncRNA	chr2:115591406-115593165	ENSG00000207997.1	MIR644A	miRNA	chr20:33054129-33054223
ENSG00000182634.7	OR10G7	coding	chr11:123908772-123909717	ENSG00000261790.1	AC005606.14.1	lncRNA	chr16:2034877-2040358	ENSG00000207997.1	MIR644A	miRNA	chr20:33054129-33054223
ENSG00000186117.2	OR5L1	coding	chr11:55578853-55579952	ENSG00000261790.1	AC005606.14.1	lncRNA	chr16:2034877-2040358	ENSG00000207997.1	MIR644A	miRNA	chr20:33054129-33054223
ENSG00000235608.1	NKX1-1	coding	chr4:1396719-1400119	ENSG00000261790.1	AC005606.14.1	lncRNA	chr16:2034877-2040358	ENSG00000207997.1	MIR644A	miRNA	chr20:33054129-33054223
ENSG00000182634.7	OR10G7	coding	chr11:123908772-123909717	ENSG00000251662.2	CTC-369A16.3.1	lncRNA	chr5:123731639-123736348	ENSG00000207997.1	MIR644A	miRNA	chr20:33054129-33054223
ENSG00000255470.1	RP11-113D6.6.1	coding	chr11:18161732-18211042	ENSG00000227090.1	AP000402.3.1	lncRNA	chr21:26258989-26275070	ENSG00000207997.1	MIR644A	miRNA	chr20:33054129-33054223
ENSG00000182634.7	OR10G7	coding	chr11:123908772-123909717	ENSG00000229379.1	AC006041.1.1	lncRNA	chr7:15880921-15881985	ENSG00000207997.1	MIR644A	miRNA	chr20:33054129-33054223
ENSG00000186117.2	OR5L1	coding	chr11:55578853-55579952	ENSG00000229379.1	AC006041.1.1	lncRNA	chr7:15880921-15881985	ENSG00000207997.1	MIR644A	miRNA	chr20:33054129-33054223
ENSG00000182634.7	OR10G7	coding	chr11:123908772-123909717	ENSG00000253403.1	RP11-348M17.2.1	lncRNA	chr5:161114352-161116414	ENSG00000207997.1	MIR644A	miRNA	chr20:33054129-33054223
ENSG00000186117.2	OR5L1	coding	chr11:55578853-55579952	ENSG00000253403.1	RP11-348M17.2.1	lncRNA	chr5:161114352-161116414	ENSG00000207997.1	MIR644A	miRNA	chr20:33054129-33054223
ENSG00000121270.11	ABCC11	coding	chr16:48200820-48281479	ENSG00000225427.1	LINC00331	lncRNA	chr13:79361453-79366442	ENSG00000207997.1	MIR644A	miRNA	chr20:33054129-33054223
ENSG00000121270.11	ABCC11	coding	chr16:48200820-48281479	ENSG00000251213.1	RP11-248N22.2.1	lncRNA	chr4:175085591-175090064	ENSG00000207997.1	MIR644A	miRNA	chr20:33054129-33054223
ENSG00000182634.7	OR10G7	coding	chr11:123908772-123909717	ENSG00000232193.1	AL157359.4.1	lncRNA	chr21:20290251-20308177	ENSG00000207997.1	MIR644A	miRNA	chr20:33054129-33054223
ENSG00000182634.7	OR10G7	coding	chr11:123908772-123909717	ENSG00000249932.1	RP11-395P13.2.1	lncRNA	chr5:124704260-124704842	ENSG00000207997.1	MIR644A	miRNA	chr20:33054129-33054223
ENSG00000182634.7	OR10G7	coding	chr11:123908772-123909717	ENSG00000241636.1	RP11-71H9.2.1	lncRNA	chr3:164388665-164403864	ENSG00000207997.1	MIR644A	miRNA	chr20:33054129-33054223
ENSG00000182634.7	OR10G7	coding	chr11:123908772-123909717	ENSG00000233689.1	RP11-123O1.1.1	lncRNA	chr7:68505138-68511790	ENSG00000207997.1	MIR644A	miRNA	chr20:33054129-33054223
ENSG00000182634.7	OR10G7	coding	chr11:123908772-123909717	ENSG00000235886.1	RP4-672N11.1.1	lncRNA	chr3:43820452-43821474	ENSG00000207997.1	MIR644A	miRNA	chr20:33054129-33054223
ENSG00000182634.7	OR10G7	coding	chr11:123908772-123909717	ENSG00000249265.1	AC113167.2.1	lncRNA	chr5:89240726-89243390	ENSG00000207997.1	MIR644A	miRNA	chr20:33054129-33054223
ENSG00000187223.3	LCE2D	coding	chr1:152635871-152637135	ENSG00000227181.1	RP11-317P15.3.1	lncRNA	chr1:182681996-182683679	ENSG00000207997.1	MIR644A	miRNA	chr20:33054129-33054223
ENSG00000187223.3	LCE2D	coding	chr1:152635871-152637135	ENSG00000250865.1	RP11-780O17.1.1	lncRNA	chr4:136713538-136727059	ENSG00000207997.1	MIR644A	miRNA	chr20:33054129-33054223
ENSG00000198271.3	KRTAP4-5	coding	chr17:39305177-39306054	ENSG00000225427.1	LINC00331	lncRNA	chr13:79361453-79366442	ENSG00000207997.1	MIR644A	miRNA	chr20:33054129-33054223
ENSG00000147885.2	IFNA16	coding	chr9:21216371-21217310	ENSG00000225427.1	LINC00331	lncRNA	chr13:79361453-79366442	ENSG00000207997.1	MIR644A	miRNA	chr20:33054129-33054223
ENSG00000114656.6	KIAA1257	coding	chr3:128628708-128721533	ENSG00000225427.1	LINC00331	lncRNA	chr13:79361453-79366442	ENSG00000207997.1	MIR644A	miRNA	chr20:33054129-33054223
ENSG00000091138.8	SLC26A3	coding	chr7:107405911-107443670	ENSG00000225427.1	LINC00331	lncRNA	chr13:79361453-79366442	ENSG00000207997.1	MIR644A	miRNA	chr20:33054129-33054223
ENSG00000186117.2	OR5L1	coding	chr11:55578853-55579952	ENSG00000237527.1	AF241725.6.1	lncRNA	chr21:23027358-23058649	ENSG00000207997.1	MIR644A	miRNA	chr20:33054129-33054223
ENSG00000186117.2	OR5L1	coding	chr11:55578853-55579952	ENSG00000249932.1	RP11-395P13.2.1	lncRNA	chr5:124704260-124704842	ENSG00000207997.1	MIR644A	miRNA	chr20:33054129-33054223
ENSG00000186117.2	OR5L1	coding	chr11:55578853-55579952	ENSG00000233410.1	RP11-16L9.3.1	lncRNA	chr1:198975168-198990166	ENSG00000207997.1	MIR644A	miRNA	chr20:33054129-33054223
ENSG00000186117.2	OR5L1	coding	chr11:55578853-55579952	ENSG00000233359.1	RP11-202K23.1.1	lncRNA	chr1:102665294-102855186	ENSG00000207997.1	MIR644A	miRNA	chr20:33054129-33054223
ENSG00000186117.2	OR5L1	coding	chr11:55578853-55579952	ENSG00000232085.1	RP11-261C10.4.1	lncRNA	chr1:243327939-243332747	ENSG00000207997.1	MIR644A	miRNA	chr20:33054129-33054223
ENSG00000186117.2	OR5L1	coding	chr11:55578853-55579952	ENSG00000238212.1	AC005863.2.1	lncRNA	chr17:14741278-14803871	ENSG00000207997.1	MIR644A	miRNA	chr20:33054129-33054223
ENSG00000186117.2	OR5L1	coding	chr11:55578853-55579952	ENSG00000237312.1	RP11-475C16.2.1	lncRNA	chr6:153625729-153630117	ENSG00000207997.1	MIR644A	miRNA	chr20:33054129-33054223
ENSG00000177596.1	AL355390.1	coding	chr13:74987093-74993252	ENSG00000227181.1	RP11-317P15.3.1	lncRNA	chr1:182681996-182683679	ENSG00000207997.1	MIR644A	miRNA	chr20:33054129-33054223
ENSG00000214397.2	AC022692.1	coding	chr15:100255907-100258029	ENSG00000253143.1	RP11-333A23.3.1	lncRNA	chr8:71383346-71392858	ENSG00000207997.1	MIR644A	miRNA	chr20:33054129-33054223
ENSG00000198271.3	KRTAP4-5	coding	chr17:39305177-39306054	ENSG00000242631.1	RP11-508N12.4.1	lncRNA	chr9:109685633-109686455	ENSG00000207997.1	MIR644A	miRNA	chr20:33054129-33054223
ENSG00000147885.2	IFNA16	coding	chr9:21216371-21217310	ENSG00000242631.1	RP11-508N12.4.1	lncRNA	chr9:109685633-109686455	ENSG00000207997.1	MIR644A	miRNA	chr20:33054129-33054223
ENSG00000184724.4	KRTAP6-1	coding	chr21:31985749-31989896	ENSG00000242631.1	RP11-508N12.4.1	lncRNA	chr9:109685633-109686455	ENSG00000207997.1	MIR644A	miRNA	chr20:33054129-33054223
ENSG00000212659.1	KRTAP9-6	coding	chr17:39421590-39422893	ENSG00000238212.1	AC005863.2.1	lncRNA	chr17:14741278-14803871	ENSG00000207997.1	MIR644A	miRNA	chr20:33054129-33054223
ENSG00000198271.3	KRTAP4-5	coding	chr17:39305177-39306054	ENSG00000251213.1	RP11-248N22.2.1	lncRNA	chr4:175085591-175090064	ENSG00000207997.1	MIR644A	miRNA	chr20:33054129-33054223
ENSG00000204548.3	DEFB121	coding	chr20:29992647-30000641	ENSG00000253143.1	RP11-333A23.3.1	lncRNA	chr8:71383346-71392858	ENSG00000207997.1	MIR644A	miRNA	chr20:33054129-33054223
ENSG00000147885.2	IFNA16	coding	chr9:21216371-21217310	ENSG00000244471.1	RP11-78J21.4.1	lncRNA	chr13:53063127-53073440	ENSG00000207997.1	MIR644A	miRNA	chr20:33054129-33054223
ENSG00000147885.2	IFNA16	coding	chr9:21216371-21217310	ENSG00000251213.1	RP11-248N22.2.1	lncRNA	chr4:175085591-175090064	ENSG00000207997.1	MIR644A	miRNA	chr20:33054129-33054223
ENSG00000251184.1	RP11-101E3.5.1	coding	chr9:131703756-131719300	ENSG00000233410.1	RP11-16L9.3.1	lncRNA	chr1:198975168-198990166	ENSG00000207997.1	MIR644A	miRNA	chr20:33054129-33054223
ENSG00000177596.1	AL355390.1	coding	chr13:74987093-74993252	ENSG00000254456.1	RP11-405K6.1.1	lncRNA	chr11:25756316-25803305	ENSG00000207997.1	MIR644A	miRNA	chr20:33054129-33054223
ENSG00000177596.1	AL355390.1	coding	chr13:74987093-74993252	ENSG00000233451.1	RP11-301N24.3.1	lncRNA	chr10:22650100-22701996	ENSG00000207997.1	MIR644A	miRNA	chr20:33054129-33054223
ENSG00000114656.6	KIAA1257	coding	chr3:128628708-128721533	ENSG00000251213.1	RP11-248N22.2.1	lncRNA	chr4:175085591-175090064	ENSG00000207997.1	MIR644A	miRNA	chr20:33054129-33054223
ENSG00000091138.8	SLC26A3	coding	chr7:107405911-107443670	ENSG00000251213.1	RP11-248N22.2.1	lncRNA	chr4:175085591-175090064	ENSG00000207997.1	MIR644A	miRNA	chr20:33054129-33054223
ENSG00000184724.4	KRTAP6-1	coding	chr21:31985749-31989896	ENSG00000227303.1	GS1-256O22.5.1	lncRNA	chrX:142372753-142604631	ENSG00000207997.1	MIR644A	miRNA	chr20:33054129-33054223
ENSG00000005469.7	CROT	coding	chr7:86974996-87029111	ENSG00000229796.1	RP5-1077H22.1.1	lncRNA	chr6:958562-962511	ENSG00000221680.1	MIR1278	miRNA	chr1:193105632-193105713
ENSG00000006025.6	OSBPL7	coding	chr17:45884732-45899200	ENSG00000249941.1	CTD-2046I8.1.1	lncRNA	chr5:4866633-4874872	ENSG00000221737.1	MIR548I1	miRNA	chr3:125509246-125509395
ENSG00000099977.9	DDT	coding	chr22:24313553-24322660	ENSG00000229175.1	RP11-501G7.1.1	lncRNA	chr13:80446720-80492079	ENSG00000211589.1	MIR744	miRNA	chr17:11985215-11985313
ENSG00000099977.9	DDT	coding	chr22:24313553-24322660	ENSG00000229175.1	RP11-501G7.1.1	lncRNA	chr13:80446720-80492079	ENSG00000207629.1	MIR526A1	miRNA	chr19:54209505-54209590
ENSG00000099977.9	DDT	coding	chr22:24313553-24322660	ENSG00000225794.1	AC073321.4.1	lncRNA	chr2:217469493-217475925	ENSG00000207629.1	MIR526A1	miRNA	chr19:54209505-54209590
ENSG00000099977.9	DDT	coding	chr22:24313553-24322660	ENSG00000228488.1	AC092168.4.1	lncRNA	chr2:101338682-101339344	ENSG00000207629.1	MIR526A1	miRNA	chr19:54209505-54209590
ENSG00000099977.9	DDT	coding	chr22:24313553-24322660	ENSG00000233651.1	RP11-111F5.8.1	lncRNA	chr9:46698573-46705305	ENSG00000207629.1	MIR526A1	miRNA	chr19:54209505-54209590
ENSG00000006712.9	PAF1	coding	chr19:39876274-39881757	ENSG00000232512.1	AP000233.2.1	lncRNA	chr21:26467334-26475983	ENSG00000207654.1	MIR128-1	miRNA	chr2:136422966-136423048
ENSG00000006712.9	PAF1	coding	chr19:39876274-39881757	ENSG00000233997.1	AP000475.2.1	lncRNA	chr21:23119292-23169735	ENSG00000207654.1	MIR128-1	miRNA	chr2:136422966-136423048
ENSG00000006712.9	PAF1	coding	chr19:39876274-39881757	ENSG00000236335.1	RP4-591L5.1.1	lncRNA	chr1:30882406-30884485	ENSG00000207654.1	MIR128-1	miRNA	chr2:136422966-136423048
ENSG00000006712.9	PAF1	coding	chr19:39876274-39881757	ENSG00000253427.1	RP11-103H7.1.1	lncRNA	chr8:127486433-127504841	ENSG00000207654.1	MIR128-1	miRNA	chr2:136422966-136423048
ENSG00000006712.9	PAF1	coding	chr19:39876274-39881757	ENSG00000224702.1	RP11-38C18.2.1	lncRNA	chr1:165179863-165182327	ENSG00000207654.1	MIR128-1	miRNA	chr2:136422966-136423048
ENSG00000006712.9	PAF1	coding	chr19:39876274-39881757	ENSG00000229118.1	AC068491.2.1	lncRNA	chr2:112022859-112037457	ENSG00000207654.1	MIR128-1	miRNA	chr2:136422966-136423048
ENSG00000006712.9	PAF1	coding	chr19:39876274-39881757	ENSG00000231487.1	AP006285.7.1	lncRNA	chr11:1683813-1684573	ENSG00000207654.1	MIR128-1	miRNA	chr2:136422966-136423048
ENSG00000006712.9	PAF1	coding	chr19:39876274-39881757	ENSG00000256341.1	RP11-21A7A.3.1	lncRNA	chr11:63885743-63886682	ENSG00000207654.1	MIR128-1	miRNA	chr2:136422966-136423048
ENSG00000006712.9	PAF1	coding	chr19:39876274-39881757	ENSG00000229025.1	AP001595.1.1	lncRNA	chr21:27722098-27722953	ENSG00000207654.1	MIR128-1	miRNA	chr2:136422966-136423048
ENSG00000006712.9	PAF1	coding	chr19:39876274-39881757	ENSG00000225759.1	LINC00489	lncRNA	chr20:36247699-36251521	ENSG00000207654.1	MIR128-1	miRNA	chr2:136422966-136423048
ENSG00000006712.9	PAF1	coding	chr19:39876274-39881757	ENSG00000231487.1	AP006285.7.1	lncRNA	chr11:1683813-1684573	ENSG00000207838.1	MIR517C	miRNA	chr19:54244566-54244661
ENSG00000233816.2	IFNA13	coding	chr9:21367370-21368075	ENSG00000253948.1	RP11-410L14.2.1	lncRNA	chr8:100008990-100025272	ENSG00000207746.1	MIR575	miRNA	chr4:83674489-83674583
ENSG00000233816.2	IFNA13	coding	chr9:21367370-21368075	ENSG00000253948.1	RP11-410L14.2.1	lncRNA	chr8:100008990-100025272	ENSG00000238682.1	MIR376C	miRNA	chr14:101506016-101506102
ENSG00000233816.2	IFNA13	coding	chr9:21367370-21368075	ENSG00000260564.1	RP11-403N16.3.1	lncRNA	chr9:82503915-82506922	ENSG00000207577.1	MIR587	miRNA	chr6:107231999-107232095
ENSG00000233816.2	IFNA13	coding	chr9:21367370-21368075	ENSG00000261818.1	RP11-351A20.1.1	lncRNA	chr16:65614570-65680850	ENSG00000207596.1	MIR194-2	miRNA	chr11:64658826-64658911
ENSG00000233816.2	IFNA13	coding	chr9:21367370-21368075	ENSG00000234710.1	AC060834.3.1	lncRNA	chr7:9776950-9809142	ENSG00000207869.1	MIR498	miRNA	chr19:54177450-54177574
ENSG00000233816.2	IFNA13	coding	chr9:21367370-21368075	ENSG00000259877.1	RP11-46C24.7.1	lncRNA	chr16:89281637-89284061	ENSG00000207746.1	MIR575	miRNA	chr4:83674489-83674583
ENSG00000233816.2	IFNA13	coding	chr9:21367370-21368075	ENSG00000237312.1	RP11-475C16.2.1	lncRNA	chr6:153625729-153630117	ENSG00000238682.1	MIR376C	miRNA	chr14:101506016-101506102
ENSG00000047621.7	C12orf4	coding	chr12:4596893-4647674	ENSG00000249941.1	CTD-2046I8.1.1	lncRNA	chr5:4866633-4874872	ENSG00000221737.1	MIR548I1	miRNA	chr3:125509246-125509395
ENSG00000079387.9	SENP1	coding	chr12:48436680-48500091	ENSG00000236335.1	RP4-591L5.1.1	lncRNA	chr1:30882406-30884485	ENSG00000207654.1	MIR128-1	miRNA	chr2:136422966-136423048
ENSG00000079387.9	SENP1	coding	chr12:48436680-48500091	ENSG00000231487.1	AP006285.7.1	lncRNA	chr11:1683813-1684573	ENSG00000207654.1	MIR128-1	miRNA	chr2:136422966-136423048
ENSG00000015153.10	YAF2	coding	chr12:42550905-42632151	ENSG00000236335.1	RP4-591L5.1.1	lncRNA	chr1:30882406-30884485	ENSG00000207654.1	MIR128-1	miRNA	chr2:136422966-136423048
ENSG00000015153.10	YAF2	coding	chr12:42550905-42632151	ENSG00000231487.1	AP006285.7.1	lncRNA	chr11:1683813-1684573	ENSG00000207654.1	MIR128-1	miRNA	chr2:136422966-136423048
ENSG00000015153.10	YAF2	coding	chr12:42550905-42632151	ENSG00000256341.1	RP11-21A7A.3.1	lncRNA	chr11:63885743-63886682	ENSG00000207654.1	MIR128-1	miRNA	chr2:136422966-136423048
ENSG00000061273.12	HDAC7	coding	chr12:48176504-48226915	ENSG00000236335.1	RP4-591L5.1.1	lncRNA	chr1:30882406-30884485	ENSG00000207654.1	MIR128-1	miRNA	chr2:136422966-136423048
ENSG00000061273.12	HDAC7	coding	chr12:48176504-48226915	ENSG00000229118.1	AC068491.2.1	lncRNA	chr2:112022859-112037457	ENSG00000207654.1	MIR128-1	miRNA	chr2:136422966-136423048
ENSG00000061273.12	HDAC7	coding	chr12:48176504-48226915	ENSG00000231487.1	AP006285.7.1	lncRNA	chr11:1683813-1684573	ENSG00000207654.1	MIR128-1	miRNA	chr2:136422966-136423048
ENSG00000006625.11	GGCT	coding	chr7:30536236-30544460	ENSG00000249994.1	CTD-2383I20.1.1	lncRNA	chr5:4033825-4041877	ENSG00000207546.1	MIR548C	miRNA	chr12:65016288-65016385
ENSG00000006625.11	GGCT	coding	chr7:30536236-30544460	ENSG00000232512.1	AP000233.2.1	lncRNA	chr21:26467334-26475983	ENSG00000207546.1	MIR548C	miRNA	chr12:65016288-65016385
ENSG00000055483.10	USP36	coding	chr17:76792964-76836969	ENSG00000237874.1	RP3-393K13.1.1	lncRNA	chr6:84437773-84446244	ENSG00000207976.1	MIR607	miRNA	chr10:98588425-98588521
ENSG00000055483.10	USP36	coding	chr17:76792964-76836969	ENSG00000254659.1	RP11-262A12.1.1	lncRNA	chr11:109622171-109694573	ENSG00000207976.1	MIR607	miRNA	chr10:98588425-98588521
ENSG00000102080.8	TEX28P2	coding	chrX:153424681-153445634	ENSG00000225058.1	RP11-132N15.1.1	lncRNA	chr3:187715209-187721778	ENSG00000221493.1	MIR320C1	miRNA	chr18:19263470-19263558
ENSG00000206104.2	KRTAP20-3	coding	chr21:32015182-32015455	ENSG00000235283.2	RP11-395E19.5.1	lncRNA	chr9:40704467-40713709	ENSG00000211580.1	MIR769	miRNA	chr19:46522189-46522307
ENSG00000236029.3	AL953854.2.1	coding	chr9:47295854-47314322	ENSG00000235283.2	RP11-395E19.5.1	lncRNA	chr9:40704467-40713709	ENSG00000207649.1	MIR138-2	miRNA	chr16:56892429-56892513
ENSG00000173673.7	HES3	coding	chr1:6304251-6305638	ENSG00000235283.2	RP11-395E19.5.1	lncRNA	chr9:40704467-40713709	ENSG00000207580.1	MIR526B	miRNA	chr19:54197646-54197729
ENSG00000173673.7	HES3	coding	chr1:6304251-6305638	ENSG00000235283.2	RP11-395E19.5.1	lncRNA	chr9:40704467-40713709	ENSG00000207992.1	MIR519A1	miRNA	chr19:54255650-54255735
ENSG00000173673.7	HES3	coding	chr1:6304251-6305638	ENSG00000235283.2	RP11-395E19.5.1	lncRNA	chr9:40704467-40713709	ENSG00000207583.1	MIR606	miRNA	chr10:77312215-77312311
ENSG00000261421.1	RP11-22D3.1.1	coding	chr16:49193418-49195934	ENSG00000235283.2	RP11-395E19.5.1	lncRNA	chr9:40704467-40713709	ENSG00000207580.1	MIR526B	miRNA	chr19:54197646-54197729
ENSG00000261421.1	RP11-22D3.1.1	coding	chr16:49193418-49195934	ENSG00000235283.2	RP11-395E19.5.1	lncRNA	chr9:40704467-40713709	ENSG00000215946.1	MIR941-1	miRNA	chr20:62551375-62551466
ENSG00000261421.1	RP11-22D3.1.1	coding	chr16:49193418-49195934	ENSG00000235283.2	RP11-395E19.5.1	lncRNA	chr9:40704467-40713709	ENSG00000211580.1	MIR769	miRNA	chr19:46522189-46522307
ENSG00000136839.1	OR13C9	coding	chr9:107379528-107380485	ENSG00000233997.1	AP000475.2.1	lncRNA	chr21:23119292-23169735	ENSG00000207654.1	MIR128-1	miRNA	chr2:136422966-136423048
ENSG00000136839.1	OR13C9	coding	chr9:107379528-107380485	ENSG00000250806.2	CTC-293G12.1.1	lncRNA	chr5:99989815-99993674	ENSG00000253030.1	MIR2116	miRNA	chr15:59463381-59463461
ENSG00000136839.1	OR13C9	coding	chr9:107379528-107380485	ENSG00000248143.1	RP11-324J13.2.1	lncRNA	chr4:43459543-43494560	ENSG00000207946.1	MIR516B1	miRNA	chr19:54240098-54240188
ENSG00000136839.1	OR13C9	coding	chr9:107379528-107380485	ENSG00000248143.1	RP11-324J13.2.1	lncRNA	chr4:43459543-43494560	ENSG00000207735.1	MIR520D	miRNA	chr19:54223349-54223436
ENSG00000136839.1	OR13C9	coding	chr9:107379528-107380485	ENSG00000233997.1	AP000475.2.1	lncRNA	chr21:23119292-23169735	ENSG00000199030.1	MIRLET7C	miRNA	chr21:17912142-17912236
ENSG00000136839.1	OR13C9	coding	chr9:107379528-107380485	ENSG00000236635.1	RP11-35J1.1.1	lncRNA	chr6:77232167-77303340	ENSG00000207803.1	MIR518A1	miRNA	chr19:54234259-54234344
ENSG00000136839.1	OR13C9	coding	chr9:107379528-107380485	ENSG00000260867.1	RP11-459F6.1.1	lncRNA	chr16:58231015-58251709	ENSG00000199030.1	MIRLET7C	miRNA	chr21:17912142-17912236
ENSG00000136839.1	OR13C9	coding	chr9:107379528-107380485	ENSG00000256888.1	RP13-81N3.2.1	lncRNA	chr12:10902832-10930043	ENSG00000199030.1	MIRLET7C	miRNA	chr21:17912142-17912236
ENSG00000136839.1	OR13C9	coding	chr9:107379528-107380485	ENSG00000235446.1	RP11-74K19.1.1	lncRNA	chr1:69709054-69715106	ENSG00000211514.1	MIR454	miRNA	chr17:57215118-57215233
ENSG00000136839.1	OR13C9	coding	chr9:107379528-107380485	ENSG00000226047.1	RP11-196I18.4.1	lncRNA	chr9:109879739-109883986	ENSG00000211514.1	MIR454	miRNA	chr17:57215118-57215233
ENSG00000136839.1	OR13C9	coding	chr9:107379528-107380485	ENSG00000231413.1	RP11-193P11.3.1	lncRNA	chr1:48544458-48547868	ENSG00000207624.1	MIR194-1	miRNA	chr1:220291498-220291583
ENSG00000136839.1	OR13C9	coding	chr9:107379528-107380485	ENSG00000224933.1	RP11-20O12.1.1	lncRNA	chr13:76587158-76588637	ENSG00000207624.1	MIR194-1	miRNA	chr1:220291498-220291583
ENSG00000136839.1	OR13C9	coding	chr9:107379528-107380485	ENSG00000259447.1	RP11-462P6.1.1	lncRNA	chr15:39592618-39602983	ENSG00000207803.1	MIR518A1	miRNA	chr19:54234259-54234344
ENSG00000108270.5	AATF	coding	chr17:35306174-35414170	ENSG00000259110.1	RP11-359N5.1.1	lncRNA	chr14:97621193-97625073	ENSG00000207756.1	MIR580	miRNA	chr5:36147993-36148090
ENSG00000108270.5	AATF	coding	chr17:35306174-35414170	ENSG00000223870.1	AP000233.3.1	lncRNA	chr21:26499781-26507561	ENSG00000207756.1	MIR580	miRNA	chr5:36147993-36148090
ENSG00000105880.4	DLX5	coding	chr7:96649703-96654409	ENSG00000238022.1	RP11-38C18.3.1	lncRNA	chr1:165185216-165188341	ENSG00000221264.1	MIR1284	miRNA	chr3:71591120-71591240
ENSG00000184954.4	OR6C70	coding	chr12:55862983-55863922	ENSG00000259720.1	RP11-348B17.1.1	lncRNA	chr15:31294215-31334505	ENSG00000221264.1	MIR1284	miRNA	chr3:71591120-71591240
ENSG00000184954.4	OR6C70	coding	chr12:55862983-55863922	ENSG00000238022.1	RP11-38C18.3.1	lncRNA	chr1:165185216-165188341	ENSG00000221264.1	MIR1284	miRNA	chr3:71591120-71591240
ENSG00000184954.4	OR6C70	coding	chr12:55862983-55863922	ENSG00000253108.1	RP1-84O15.2.1	lncRNA	chr8:34085956-34204249	ENSG00000221264.1	MIR1284	miRNA	chr3:71591120-71591240
ENSG00000261421.1	RP11-22D3.1.1	coding	chr16:49193418-49195934	ENSG00000257541.1	RP11-58A17.4.1	lncRNA	chr12:58481674-58487145	ENSG00000221264.1	MIR1284	miRNA	chr3:71591120-71591240
ENSG00000261421.1	RP11-22D3.1.1	coding	chr16:49193418-49195934	ENSG00000256922.1	RP11-749H20.1.1	lncRNA	chr12:128278071-128305728	ENSG00000221264.1	MIR1284	miRNA	chr3:71591120-71591240
ENSG00000261421.1	RP11-22D3.1.1	coding	chr16:49193418-49195934	ENSG00000257750.1	RP11-295G12.1.1	lncRNA	chr12:74154468-74192507	ENSG00000221264.1	MIR1284	miRNA	chr3:71591120-71591240
ENSG00000261421.1	RP11-22D3.1.1	coding	chr16:49193418-49195934	ENSG00000248533.1	CTD-2130F23.1.1	lncRNA	chr5:37953503-37967066	ENSG00000221264.1	MIR1284	miRNA	chr3:71591120-71591240
ENSG00000261421.1	RP11-22D3.1.1	coding	chr16:49193418-49195934	ENSG00000244472.1	RP1-302D9.4.1	lncRNA	chr22:33562372-33617737	ENSG00000221264.1	MIR1284	miRNA	chr3:71591120-71591240
ENSG00000261421.1	RP11-22D3.1.1	coding	chr16:49193418-49195934	ENSG00000235356.1	RP11-428G2.1.1	lncRNA	chr10:67073542-67074728	ENSG00000221264.1	MIR1284	miRNA	chr3:71591120-71591240
ENSG00000261421.1	RP11-22D3.1.1	coding	chr16:49193418-49195934	ENSG00000227489.1	AC006458.3.1	lncRNA	chr7:15105831-15108276	ENSG00000221264.1	MIR1284	miRNA	chr3:71591120-71591240
ENSG00000261421.1	RP11-22D3.1.1	coding	chr16:49193418-49195934	ENSG00000233403.1	RP11-86A5.1.1	lncRNA	chrX:25896455-25911661	ENSG00000221264.1	MIR1284	miRNA	chr3:71591120-71591240
ENSG00000261421.1	RP11-22D3.1.1	coding	chr16:49193418-49195934	ENSG00000251329.1	RP11-240A16.1.1	lncRNA	chr4:32352659-32354842	ENSG00000221264.1	MIR1284	miRNA	chr3:71591120-71591240
ENSG00000261421.1	RP11-22D3.1.1	coding	chr16:49193418-49195934	ENSG00000251412.1	AC006296.1.1	lncRNA	chr4:14384746-14410702	ENSG00000221264.1	MIR1284	miRNA	chr3:71591120-71591240
ENSG00000261421.1	RP11-22D3.1.1	coding	chr16:49193418-49195934	ENSG00000257183.1	RP11-274M17.3.1	lncRNA	chr12:74642416-74677449	ENSG00000221264.1	MIR1284	miRNA	chr3:71591120-71591240
ENSG00000261421.1	RP11-22D3.1.1	coding	chr16:49193418-49195934	ENSG00000253753.1	AC145123.2.1	lncRNA	chr8:143719948-143722027	ENSG00000221264.1	MIR1284	miRNA	chr3:71591120-71591240
ENSG00000261421.1	RP11-22D3.1.1	coding	chr16:49193418-49195934	ENSG00000249675.1	RP11-217C7.1.1	lncRNA	chr4:167309852-167447271	ENSG00000221264.1	MIR1284	miRNA	chr3:71591120-71591240
ENSG00000261421.1	RP11-22D3.1.1	coding	chr16:49193418-49195934	ENSG00000232636.1	LINC00438	lncRNA	chr13:88079468-88080528	ENSG00000221264.1	MIR1284	miRNA	chr3:71591120-71591240
ENSG00000261421.1	RP11-22D3.1.1	coding	chr16:49193418-49195934	ENSG00000248631.1	RP11-425E13.1.1	lncRNA	chr5:124537580-124538223	ENSG00000221264.1	MIR1284	miRNA	chr3:71591120-71591240
ENSG00000167195.7	GOLGA6C	coding	chr15:75550939-75562540	ENSG00000259720.1	RP11-348B17.1.1	lncRNA	chr15:31294215-31334505	ENSG00000221264.1	MIR1284	miRNA	chr3:71591120-71591240
ENSG00000259815.1	RP11-565N2.2.1	coding	chr1:208800085-208801430	ENSG00000241101.1	PRICKLE2-AS2	lncRNA	chr3:64089145-64091732	ENSG00000221264.1	MIR1284	miRNA	chr3:71591120-71591240
ENSG00000259815.1	RP11-565N2.2.1	coding	chr1:208800085-208801430	ENSG00000244968.2	LIFR-AS1	lncRNA	chr5:38556887-38671318	ENSG00000221264.1	MIR1284	miRNA	chr3:71591120-71591240
ENSG00000221977.1	OR4E2	coding	chr14:22133296-22134238	ENSG00000244968.2	LIFR-AS1	lncRNA	chr5:38556887-38671318	ENSG00000221264.1	MIR1284	miRNA	chr3:71591120-71591240
ENSG00000167195.7	GOLGA6C	coding	chr15:75550939-75562540	ENSG00000258383.1	CTD-2200A16.1.1	lncRNA	chr14:99791135-99798352	ENSG00000221264.1	MIR1284	miRNA	chr3:71591120-71591240
ENSG00000259815.1	RP11-565N2.2.1	coding	chr1:208800085-208801430	ENSG00000258383.1	CTD-2200A16.1.1	lncRNA	chr14:99791135-99798352	ENSG00000221264.1	MIR1284	miRNA	chr3:71591120-71591240
ENSG00000221977.1	OR4E2	coding	chr14:22133296-22134238	ENSG00000258383.1	CTD-2200A16.1.1	lncRNA	chr14:99791135-99798352	ENSG00000221264.1	MIR1284	miRNA	chr3:71591120-71591240
ENSG00000167195.7	GOLGA6C	coding	chr15:75550939-75562540	ENSG00000253753.1	AC145123.2.1	lncRNA	chr8:143719948-143722027	ENSG00000221264.1	MIR1284	miRNA	chr3:71591120-71591240
ENSG00000154007.6	ASB17	coding	chr1:76384557-76398116	ENSG00000257750.1	RP11-295G12.1.1	lncRNA	chr12:74154468-74192507	ENSG00000221264.1	MIR1284	miRNA	chr3:71591120-71591240
ENSG00000211674.2	IGLJ1	coding	chr22:23235871-23235998	ENSG00000257750.1	RP11-295G12.1.1	lncRNA	chr12:74154468-74192507	ENSG00000221264.1	MIR1284	miRNA	chr3:71591120-71591240
ENSG00000158528.7	PPP1R9A	coding	chr7:94536513-94925727	ENSG00000238022.1	RP11-38C18.3.1	lncRNA	chr1:165185216-165188341	ENSG00000221264.1	MIR1284	miRNA	chr3:71591120-71591240
ENSG00000254774.1	RP11-148O21.3.1	coding	chr8:11410732-11411716	ENSG00000235356.1	RP11-428G2.1.1	lncRNA	chr10:67073542-67074728	ENSG00000221264.1	MIR1284	miRNA	chr3:71591120-71591240
ENSG00000254774.1	RP11-148O21.3.1	coding	chr8:11410732-11411716	ENSG00000233403.1	RP11-86A5.1.1	lncRNA	chrX:25896455-25911661	ENSG00000221264.1	MIR1284	miRNA	chr3:71591120-71591240
ENSG00000221977.1	OR4E2	coding	chr14:22133296-22134238	ENSG00000248890.1	RP11-291L15.2.1	lncRNA	chr4:145564073-145582509	ENSG00000221264.1	MIR1284	miRNA	chr3:71591120-71591240
ENSG00000221977.1	OR4E2	coding	chr14:22133296-22134238	ENSG00000254260.1	RP11-369E15.1.1	lncRNA	chr8:20798938-20807686	ENSG00000221264.1	MIR1284	miRNA	chr3:71591120-71591240
ENSG00000211674.2	IGLJ1	coding	chr22:23235871-23235998	ENSG00000225203.1	TBC1D4-AS1	lncRNA	chr13:75949646-75950209	ENSG00000221264.1	MIR1284	miRNA	chr3:71591120-71591240
ENSG00000211674.2	IGLJ1	coding	chr22:23235871-23235998	ENSG00000248631.1	RP11-425E13.1.1	lncRNA	chr5:124537580-124538223	ENSG00000221264.1	MIR1284	miRNA	chr3:71591120-71591240
ENSG00000211674.2	IGLJ1	coding	chr22:23235871-23235998	ENSG00000234653.1	AC079117.1.1	lncRNA	chr2:77213090-77236917	ENSG00000221264.1	MIR1284	miRNA	chr3:71591120-71591240
ENSG00000258804.1	RP11-322L20.1.1	coding	chr14:87372121-87389099	ENSG00000234653.1	AC079117.1.1	lncRNA	chr2:77213090-77236917	ENSG00000221264.1	MIR1284	miRNA	chr3:71591120-71591240
ENSG00000221977.1	OR4E2	coding	chr14:22133296-22134238	ENSG00000232896.1	RP11-410K21.2.1	lncRNA	chr9:113361754-113367499	ENSG00000221264.1	MIR1284	miRNA	chr3:71591120-71591240
ENSG00000065717.8	TLE2	coding	chr19:2997636-3045786	ENSG00000236335.1	RP4-591L5.1.1	lncRNA	chr1:30882406-30884485	ENSG00000207654.1	MIR128-1	miRNA	chr2:136422966-136423048
ENSG00000065717.8	TLE2	coding	chr19:2997636-3045786	ENSG00000231487.1	AP006285.7.1	lncRNA	chr11:1683813-1684573	ENSG00000207654.1	MIR128-1	miRNA	chr2:136422966-136423048
ENSG00000005961.11	ITGA2B	coding	chr17:42449549-42466873	ENSG00000234862.1	RP5-1097P24.1.1	lncRNA	chr20:22201191-22203921	ENSG00000207755.1	MIR450A2	miRNA	chrX:133674537-133674637
ENSG00000211693.2	TRGV11	coding	chr7:38331216-38331679	ENSG00000249994.1	CTD-2383I20.1.1	lncRNA	chr5:4033825-4041877	ENSG00000207546.1	MIR548C	miRNA	chr12:65016288-65016385
ENSG00000261421.1	RP11-22D3.1.1	coding	chr16:49193418-49195934	ENSG00000249994.1	CTD-2383I20.1.1	lncRNA	chr5:4033825-4041877	ENSG00000207546.1	MIR548C	miRNA	chr12:65016288-65016385
ENSG00000256043.2	CTSO	coding	chr4:156845269-156875069	ENSG00000249994.1	CTD-2383I20.1.1	lncRNA	chr5:4033825-4041877	ENSG00000207546.1	MIR548C	miRNA	chr12:65016288-65016385
ENSG00000211693.2	TRGV11	coding	chr7:38331216-38331679	ENSG00000249994.1	CTD-2383I20.1.1	lncRNA	chr5:4033825-4041877	ENSG00000221548.1	MIR1283-2	miRNA	chr19:54261485-54261572
ENSG00000211693.2	TRGV11	coding	chr7:38331216-38331679	ENSG00000232512.1	AP000233.2.1	lncRNA	chr21:26467334-26475983	ENSG00000207546.1	MIR548C	miRNA	chr12:65016288-65016385
ENSG00000211693.2	TRGV11	coding	chr7:38331216-38331679	ENSG00000244968.2	LIFR-AS1	lncRNA	chr5:38556887-38671318	ENSG00000207546.1	MIR548C	miRNA	chr12:65016288-65016385
ENSG00000211693.2	TRGV11	coding	chr7:38331216-38331679	ENSG00000236914.3	RP11-1008C21.2.1	lncRNA	chr15:38361681-38365160	ENSG00000207546.1	MIR548C	miRNA	chr12:65016288-65016385
ENSG00000211693.2	TRGV11	coding	chr7:38331216-38331679	ENSG00000249152.1	RP11-562F9.2.1	lncRNA	chr4:93189917-93198226	ENSG00000207546.1	MIR548C	miRNA	chr12:65016288-65016385
ENSG00000211693.2	TRGV11	coding	chr7:38331216-38331679	ENSG00000258119.1	RP11-804F13.1.1	lncRNA	chr12:38937978-38983614	ENSG00000207546.1	MIR548C	miRNA	chr12:65016288-65016385
ENSG00000211693.2	TRGV11	coding	chr7:38331216-38331679	ENSG00000225070.1	LL22NC03-23C6.13.1	lncRNA	chr22:22390742-22394463	ENSG00000207546.1	MIR548C	miRNA	chr12:65016288-65016385
ENSG00000211693.2	TRGV11	coding	chr7:38331216-38331679	ENSG00000227608.1	DCUN1D2-AS1	lncRNA	chr13:114110943-114116670	ENSG00000207546.1	MIR548C	miRNA	chr12:65016288-65016385
ENSG00000211693.2	TRGV11	coding	chr7:38331216-38331679	ENSG00000251336.1	RP11-540E16.2.1	lncRNA	chr4:182741171-182751126	ENSG00000207546.1	MIR548C	miRNA	chr12:65016288-65016385
ENSG00000211693.2	TRGV11	coding	chr7:38331216-38331679	ENSG00000249882.1	RP11-665I14.1.1	lncRNA	chr4:31508287-31560443	ENSG00000207546.1	MIR548C	miRNA	chr12:65016288-65016385
ENSG00000211693.2	TRGV11	coding	chr7:38331216-38331679	ENSG00000261376.1	RP11-525K10.2.1	lncRNA	chr16:80213025-80214579	ENSG00000207546.1	MIR548C	miRNA	chr12:65016288-65016385
ENSG00000211693.2	TRGV11	coding	chr7:38331216-38331679	ENSG00000223344.1	RP11-541F9.1.1	lncRNA	chr1:191827836-191859359	ENSG00000207546.1	MIR548C	miRNA	chr12:65016288-65016385
ENSG00000211693.2	TRGV11	coding	chr7:38331216-38331679	ENSG00000260085.1	RP11-23E10.1.1	lncRNA	chr16:33298267-33319261	ENSG00000207546.1	MIR548C	miRNA	chr12:65016288-65016385
ENSG00000211693.2	TRGV11	coding	chr7:38331216-38331679	ENSG00000240842.1	RP11-62G11.2.1	lncRNA	chr3:69613256-69620273	ENSG00000207546.1	MIR548C	miRNA	chr12:65016288-65016385
ENSG00000211693.2	TRGV11	coding	chr7:38331216-38331679	ENSG00000240980.1	RP11-734K21.4.1	lncRNA	chr2:9283294-9286235	ENSG00000207546.1	MIR548C	miRNA	chr12:65016288-65016385
ENSG00000211693.2	TRGV11	coding	chr7:38331216-38331679	ENSG00000258007.1	RP11-350G24.1.1	lncRNA	chr12:101432197-101432872	ENSG00000207546.1	MIR548C	miRNA	chr12:65016288-65016385
ENSG00000211693.2	TRGV11	coding	chr7:38331216-38331679	ENSG00000260406.1	RP11-402F9.3.1	lncRNA	chr15:43594293-43594970	ENSG00000207546.1	MIR548C	miRNA	chr12:65016288-65016385
ENSG00000211693.2	TRGV11	coding	chr7:38331216-38331679	ENSG00000259107.1	CTD-2128A3.1.1	lncRNA	chr14:85860222-85886418	ENSG00000207546.1	MIR548C	miRNA	chr12:65016288-65016385
ENSG00000211693.2	TRGV11	coding	chr7:38331216-38331679	ENSG00000254001.1	RP11-91P17.1.1	lncRNA	chr8:79060335-79066148	ENSG00000207546.1	MIR548C	miRNA	chr12:65016288-65016385
ENSG00000211693.2	TRGV11	coding	chr7:38331216-38331679	ENSG00000254007.1	RP11-281H11.1.1	lncRNA	chr8:5517200-5527599	ENSG00000207546.1	MIR548C	miRNA	chr12:65016288-65016385
ENSG00000128519.2	TAS2R16	coding	chr7:122634758-122635754	ENSG00000253740.1	KB-1083B1.1.1	lncRNA	chr8:101630808-101632221	ENSG00000207546.1	MIR548C	miRNA	chr12:65016288-65016385
ENSG00000128519.2	TAS2R16	coding	chr7:122634758-122635754	ENSG00000233193.1	AC005324.7.1	lncRNA	chr17:15664927-15667083	ENSG00000207546.1	MIR548C	miRNA	chr12:65016288-65016385
ENSG00000128519.2	TAS2R16	coding	chr7:122634758-122635754	ENSG00000232512.1	AP000233.2.1	lncRNA	chr21:26467334-26475983	ENSG00000207546.1	MIR548C	miRNA	chr12:65016288-65016385
ENSG00000128519.2	TAS2R16	coding	chr7:122634758-122635754	ENSG00000228961.1	AP000282.3.1	lncRNA	chr21:34331195-34332874	ENSG00000207546.1	MIR548C	miRNA	chr12:65016288-65016385
ENSG00000128519.2	TAS2R16	coding	chr7:122634758-122635754	ENSG00000241101.1	PRICKLE2-AS2	lncRNA	chr3:64089145-64091732	ENSG00000207546.1	MIR548C	miRNA	chr12:65016288-65016385
ENSG00000128519.2	TAS2R16	coding	chr7:122634758-122635754	ENSG00000244968.2	LIFR-AS1	lncRNA	chr5:38556887-38671318	ENSG00000207546.1	MIR548C	miRNA	chr12:65016288-65016385
ENSG00000128519.2	TAS2R16	coding	chr7:122634758-122635754	ENSG00000259055.1	RP11-1140I5.1.1	lncRNA	chr14:51555674-51558006	ENSG00000207546.1	MIR548C	miRNA	chr12:65016288-65016385
ENSG00000128519.2	TAS2R16	coding	chr7:122634758-122635754	ENSG00000258383.1	CTD-2200A16.1.1	lncRNA	chr14:99791135-99798352	ENSG00000207546.1	MIR548C	miRNA	chr12:65016288-65016385
ENSG00000128519.2	TAS2R16	coding	chr7:122634758-122635754	ENSG00000236914.3	RP11-1008C21.2.1	lncRNA	chr15:38361681-38365160	ENSG00000207546.1	MIR548C	miRNA	chr12:65016288-65016385
ENSG00000128519.2	TAS2R16	coding	chr7:122634758-122635754	ENSG00000249152.1	RP11-562F9.2.1	lncRNA	chr4:93189917-93198226	ENSG00000207546.1	MIR548C	miRNA	chr12:65016288-65016385
ENSG00000128519.2	TAS2R16	coding	chr7:122634758-122635754	ENSG00000249490.1	CTD-2333M24.1.1	lncRNA	chr5:20612733-20614874	ENSG00000207546.1	MIR548C	miRNA	chr12:65016288-65016385
ENSG00000128519.2	TAS2R16	coding	chr7:122634758-122635754	ENSG00000231718.1	RP11-382E9.1.1	lncRNA	chr1:199117725-199362435	ENSG00000207546.1	MIR548C	miRNA	chr12:65016288-65016385
ENSG00000128519.2	TAS2R16	coding	chr7:122634758-122635754	ENSG00000231363.1	RP11-148B18.1.1	lncRNA	chr1:94713463-94715048	ENSG00000207546.1	MIR548C	miRNA	chr12:65016288-65016385
ENSG00000128519.2	TAS2R16	coding	chr7:122634758-122635754	ENSG00000225070.1	LL22NC03-23C6.13.1	lncRNA	chr22:22390742-22394463	ENSG00000207546.1	MIR548C	miRNA	chr12:65016288-65016385
ENSG00000128519.2	TAS2R16	coding	chr7:122634758-122635754	ENSG00000229458.2	RP11-202D18.2.1	lncRNA	chr10:83983968-83988935	ENSG00000207546.1	MIR548C	miRNA	chr12:65016288-65016385
ENSG00000128519.2	TAS2R16	coding	chr7:122634758-122635754	ENSG00000227608.1	DCUN1D2-AS1	lncRNA	chr13:114110943-114116670	ENSG00000207546.1	MIR548C	miRNA	chr12:65016288-65016385
ENSG00000128519.2	TAS2R16	coding	chr7:122634758-122635754	ENSG00000260867.1	RP11-459F6.1.1	lncRNA	chr16:58231015-58251709	ENSG00000207546.1	MIR548C	miRNA	chr12:65016288-65016385
ENSG00000128519.2	TAS2R16	coding	chr7:122634758-122635754	ENSG00000261376.1	RP11-525K10.2.1	lncRNA	chr16:80213025-80214579	ENSG00000207546.1	MIR548C	miRNA	chr12:65016288-65016385
ENSG00000128519.2	TAS2R16	coding	chr7:122634758-122635754	ENSG00000261154.1	RP11-571O6.1.1	lncRNA	chr16:77624702-77644578	ENSG00000207546.1	MIR548C	miRNA	chr12:65016288-65016385
ENSG00000128519.2	TAS2R16	coding	chr7:122634758-122635754	ENSG00000258007.1	RP11-350G24.1.1	lncRNA	chr12:101432197-101432872	ENSG00000207546.1	MIR548C	miRNA	chr12:65016288-65016385
ENSG00000128519.2	TAS2R16	coding	chr7:122634758-122635754	ENSG00000259107.1	CTD-2128A3.1.1	lncRNA	chr14:85860222-85886418	ENSG00000207546.1	MIR548C	miRNA	chr12:65016288-65016385
ENSG00000128519.2	TAS2R16	coding	chr7:122634758-122635754	ENSG00000250150.1	RP11-436A7.1.1	lncRNA	chr4:168228060-168229940	ENSG00000207546.1	MIR548C	miRNA	chr12:65016288-65016385
ENSG00000176555.1	OR4S1	coding	chr11:48327774-48328704	ENSG00000253740.1	KB-1083B1.1.1	lncRNA	chr8:101630808-101632221	ENSG00000207546.1	MIR548C	miRNA	chr12:65016288-65016385
ENSG00000179919.3	OR10A7	coding	chr12:55614808-55615759	ENSG00000253740.1	KB-1083B1.1.1	lncRNA	chr8:101630808-101632221	ENSG00000207546.1	MIR548C	miRNA	chr12:65016288-65016385
ENSG00000206536.1	OR5K3	coding	chr3:98109509-98110475	ENSG00000241101.1	PRICKLE2-AS2	lncRNA	chr3:64089145-64091732	ENSG00000207546.1	MIR548C	miRNA	chr12:65016288-65016385
ENSG00000206536.1	OR5K3	coding	chr3:98109509-98110475	ENSG00000244968.2	LIFR-AS1	lncRNA	chr5:38556887-38671318	ENSG00000207546.1	MIR548C	miRNA	chr12:65016288-65016385
ENSG00000206536.1	OR5K3	coding	chr3:98109509-98110475	ENSG00000259055.1	RP11-1140I5.1.1	lncRNA	chr14:51555674-51558006	ENSG00000207546.1	MIR548C	miRNA	chr12:65016288-65016385
ENSG00000206536.1	OR5K3	coding	chr3:98109509-98110475	ENSG00000258383.1	CTD-2200A16.1.1	lncRNA	chr14:99791135-99798352	ENSG00000207546.1	MIR548C	miRNA	chr12:65016288-65016385
ENSG00000206536.1	OR5K3	coding	chr3:98109509-98110475	ENSG00000236914.3	RP11-1008C21.2.1	lncRNA	chr15:38361681-38365160	ENSG00000207546.1	MIR548C	miRNA	chr12:65016288-65016385
ENSG00000206536.1	OR5K3	coding	chr3:98109509-98110475	ENSG00000251336.1	RP11-540E16.2.1	lncRNA	chr4:182741171-182751126	ENSG00000207546.1	MIR548C	miRNA	chr12:65016288-65016385
ENSG00000206536.1	OR5K3	coding	chr3:98109509-98110475	ENSG00000260867.1	RP11-459F6.1.1	lncRNA	chr16:58231015-58251709	ENSG00000207546.1	MIR548C	miRNA	chr12:65016288-65016385
ENSG00000206536.1	OR5K3	coding	chr3:98109509-98110475	ENSG00000261376.1	RP11-525K10.2.1	lncRNA	chr16:80213025-80214579	ENSG00000207546.1	MIR548C	miRNA	chr12:65016288-65016385
ENSG00000206536.1	OR5K3	coding	chr3:98109509-98110475	ENSG00000250646.1	RP11-530I17.1.1	lncRNA	chr4:55919226-55958701	ENSG00000207546.1	MIR548C	miRNA	chr12:65016288-65016385
ENSG00000206536.1	OR5K3	coding	chr3:98109509-98110475	ENSG00000254467.1	RP11-634B22.4.1	lncRNA	chr11:123539206-123542345	ENSG00000207546.1	MIR548C	miRNA	chr12:65016288-65016385
ENSG00000206536.1	OR5K3	coding	chr3:98109509-98110475	ENSG00000259107.1	CTD-2128A3.1.1	lncRNA	chr14:85860222-85886418	ENSG00000207546.1	MIR548C	miRNA	chr12:65016288-65016385
ENSG00000206536.1	OR5K3	coding	chr3:98109509-98110475	ENSG00000250340.1	RP11-577G20.1.1	lncRNA	chr4:59390679-59402493	ENSG00000207546.1	MIR548C	miRNA	chr12:65016288-65016385
ENSG00000206536.1	OR5K3	coding	chr3:98109509-98110475	ENSG00000254007.1	RP11-281H11.1.1	lncRNA	chr8:5517200-5527599	ENSG00000207546.1	MIR548C	miRNA	chr12:65016288-65016385
ENSG00000176555.1	OR4S1	coding	chr11:48327774-48328704	ENSG00000233193.1	AC005324.7.1	lncRNA	chr17:15664927-15667083	ENSG00000207546.1	MIR548C	miRNA	chr12:65016288-65016385
ENSG00000221855.1	TAS2R41	coding	chr7:143174965-143175889	ENSG00000233193.1	AC005324.7.1	lncRNA	chr17:15664927-15667083	ENSG00000207546.1	MIR548C	miRNA	chr12:65016288-65016385
ENSG00000213578.4	CPLX3	coding	chr15:75118887-75124141	ENSG00000233193.1	AC005324.7.1	lncRNA	chr17:15664927-15667083	ENSG00000207546.1	MIR548C	miRNA	chr12:65016288-65016385
ENSG00000179919.3	OR10A7	coding	chr12:55614808-55615759	ENSG00000233193.1	AC005324.7.1	lncRNA	chr17:15664927-15667083	ENSG00000207546.1	MIR548C	miRNA	chr12:65016288-65016385
ENSG00000235942.2	LCE6A	coding	chr1:152815343-152816459	ENSG00000233193.1	AC005324.7.1	lncRNA	chr17:15664927-15667083	ENSG00000207546.1	MIR548C	miRNA	chr12:65016288-65016385
ENSG00000253206.1	RP11-738G5.2.1	coding	chr8:50448944-50466973	ENSG00000233193.1	AC005324.7.1	lncRNA	chr17:15664927-15667083	ENSG00000207546.1	MIR548C	miRNA	chr12:65016288-65016385
ENSG00000213578.4	CPLX3	coding	chr15:75118887-75124141	ENSG00000232512.1	AP000233.2.1	lncRNA	chr21:26467334-26475983	ENSG00000207546.1	MIR548C	miRNA	chr12:65016288-65016385
ENSG00000261421.1	RP11-22D3.1.1	coding	chr16:49193418-49195934	ENSG00000228961.1	AP000282.3.1	lncRNA	chr21:34331195-34332874	ENSG00000207546.1	MIR548C	miRNA	chr12:65016288-65016385
ENSG00000261421.1	RP11-22D3.1.1	coding	chr16:49193418-49195934	ENSG00000249152.1	RP11-562F9.2.1	lncRNA	chr4:93189917-93198226	ENSG00000207546.1	MIR548C	miRNA	chr12:65016288-65016385
ENSG00000261421.1	RP11-22D3.1.1	coding	chr16:49193418-49195934	ENSG00000260847.1	RP11-17M15.1.1	lncRNA	chr16:32199653-32204851	ENSG00000207546.1	MIR548C	miRNA	chr12:65016288-65016385
ENSG00000261421.1	RP11-22D3.1.1	coding	chr16:49193418-49195934	ENSG00000234877.2	AC092660.1.1	lncRNA	chr2:78825036-78826532	ENSG00000207546.1	MIR548C	miRNA	chr12:65016288-65016385
ENSG00000261421.1	RP11-22D3.1.1	coding	chr16:49193418-49195934	ENSG00000197462.3	AC005276.1.1	lncRNA	chr7:125557924-125573886	ENSG00000207546.1	MIR548C	miRNA	chr12:65016288-65016385
ENSG00000261421.1	RP11-22D3.1.1	coding	chr16:49193418-49195934	ENSG00000258119.1	RP11-804F13.1.1	lncRNA	chr12:38937978-38983614	ENSG00000207546.1	MIR548C	miRNA	chr12:65016288-65016385
ENSG00000261421.1	RP11-22D3.1.1	coding	chr16:49193418-49195934	ENSG00000260223.1	RP11-293N14.1.1	lncRNA	chr16:76141180-76181704	ENSG00000207546.1	MIR548C	miRNA	chr12:65016288-65016385
ENSG00000261421.1	RP11-22D3.1.1	coding	chr16:49193418-49195934	ENSG00000240478.1	RP11-416O18.2.1	lncRNA	chr3:181839671-181859925	ENSG00000207546.1	MIR548C	miRNA	chr12:65016288-65016385
ENSG00000261421.1	RP11-22D3.1.1	coding	chr16:49193418-49195934	ENSG00000231718.1	RP11-382E9.1.1	lncRNA	chr1:199117725-199362435	ENSG00000207546.1	MIR548C	miRNA	chr12:65016288-65016385
ENSG00000261421.1	RP11-22D3.1.1	coding	chr16:49193418-49195934	ENSG00000225070.1	LL22NC03-23C6.13.1	lncRNA	chr22:22390742-22394463	ENSG00000207546.1	MIR548C	miRNA	chr12:65016288-65016385
ENSG00000261421.1	RP11-22D3.1.1	coding	chr16:49193418-49195934	ENSG00000229458.2	RP11-202D18.2.1	lncRNA	chr10:83983968-83988935	ENSG00000207546.1	MIR548C	miRNA	chr12:65016288-65016385
ENSG00000261421.1	RP11-22D3.1.1	coding	chr16:49193418-49195934	ENSG00000227608.1	DCUN1D2-AS1	lncRNA	chr13:114110943-114116670	ENSG00000207546.1	MIR548C	miRNA	chr12:65016288-65016385
ENSG00000261421.1	RP11-22D3.1.1	coding	chr16:49193418-49195934	ENSG00000249882.1	RP11-665I14.1.1	lncRNA	chr4:31508287-31560443	ENSG00000207546.1	MIR548C	miRNA	chr12:65016288-65016385
ENSG00000261421.1	RP11-22D3.1.1	coding	chr16:49193418-49195934	ENSG00000225974.1	AC005550.5.1	lncRNA	chr7:15728699-15730479	ENSG00000207546.1	MIR548C	miRNA	chr12:65016288-65016385
ENSG00000261421.1	RP11-22D3.1.1	coding	chr16:49193418-49195934	ENSG00000226681.1	AC020595.1.1	lncRNA	chr2:182286880-182290476	ENSG00000207546.1	MIR548C	miRNA	chr12:65016288-65016385
ENSG00000261421.1	RP11-22D3.1.1	coding	chr16:49193418-49195934	ENSG00000251291.1	RP11-400D2.3.1	lncRNA	chr4:135345021-135379007	ENSG00000207546.1	MIR548C	miRNA	chr12:65016288-65016385
ENSG00000261421.1	RP11-22D3.1.1	coding	chr16:49193418-49195934	ENSG00000260867.1	RP11-459F6.1.1	lncRNA	chr16:58231015-58251709	ENSG00000207546.1	MIR548C	miRNA	chr12:65016288-65016385
ENSG00000261421.1	RP11-22D3.1.1	coding	chr16:49193418-49195934	ENSG00000261154.1	RP11-571O6.1.1	lncRNA	chr16:77624702-77644578	ENSG00000207546.1	MIR548C	miRNA	chr12:65016288-65016385
ENSG00000261421.1	RP11-22D3.1.1	coding	chr16:49193418-49195934	ENSG00000223344.1	RP11-541F9.1.1	lncRNA	chr1:191827836-191859359	ENSG00000207546.1	MIR548C	miRNA	chr12:65016288-65016385
ENSG00000261421.1	RP11-22D3.1.1	coding	chr16:49193418-49195934	ENSG00000254467.1	RP11-634B22.4.1	lncRNA	chr11:123539206-123542345	ENSG00000207546.1	MIR548C	miRNA	chr12:65016288-65016385
ENSG00000261421.1	RP11-22D3.1.1	coding	chr16:49193418-49195934	ENSG00000260085.1	RP11-23E10.1.1	lncRNA	chr16:33298267-33319261	ENSG00000207546.1	MIR548C	miRNA	chr12:65016288-65016385
ENSG00000261421.1	RP11-22D3.1.1	coding	chr16:49193418-49195934	ENSG00000260026.1	CTD-2015G9.1.1	lncRNA	chr16:86754293-86755560	ENSG00000207546.1	MIR548C	miRNA	chr12:65016288-65016385
ENSG00000261421.1	RP11-22D3.1.1	coding	chr16:49193418-49195934	ENSG00000240842.1	RP11-62G11.2.1	lncRNA	chr3:69613256-69620273	ENSG00000207546.1	MIR548C	miRNA	chr12:65016288-65016385
ENSG00000261421.1	RP11-22D3.1.1	coding	chr16:49193418-49195934	ENSG00000240980.1	RP11-734K21.4.1	lncRNA	chr2:9283294-9286235	ENSG00000207546.1	MIR548C	miRNA	chr12:65016288-65016385
ENSG00000261421.1	RP11-22D3.1.1	coding	chr16:49193418-49195934	ENSG00000258007.1	RP11-350G24.1.1	lncRNA	chr12:101432197-101432872	ENSG00000207546.1	MIR548C	miRNA	chr12:65016288-65016385
ENSG00000261421.1	RP11-22D3.1.1	coding	chr16:49193418-49195934	ENSG00000260406.1	RP11-402F9.3.1	lncRNA	chr15:43594293-43594970	ENSG00000207546.1	MIR548C	miRNA	chr12:65016288-65016385
ENSG00000261421.1	RP11-22D3.1.1	coding	chr16:49193418-49195934	ENSG00000257519.1	RP11-116D17.2.1	lncRNA	chr12:115700974-115708401	ENSG00000207546.1	MIR548C	miRNA	chr12:65016288-65016385
ENSG00000261421.1	RP11-22D3.1.1	coding	chr16:49193418-49195934	ENSG00000253456.1	CTD-2363C16.2.1	lncRNA	chr5:158412813-158414207	ENSG00000207546.1	MIR548C	miRNA	chr12:65016288-65016385
ENSG00000261421.1	RP11-22D3.1.1	coding	chr16:49193418-49195934	ENSG00000254007.1	RP11-281H11.1.1	lncRNA	chr8:5517200-5527599	ENSG00000207546.1	MIR548C	miRNA	chr12:65016288-65016385
ENSG00000261421.1	RP11-22D3.1.1	coding	chr16:49193418-49195934	ENSG00000250150.1	RP11-436A7.1.1	lncRNA	chr4:168228060-168229940	ENSG00000207546.1	MIR548C	miRNA	chr12:65016288-65016385
ENSG00000213578.4	CPLX3	coding	chr15:75118887-75124141	ENSG00000241101.1	PRICKLE2-AS2	lncRNA	chr3:64089145-64091732	ENSG00000207546.1	MIR548C	miRNA	chr12:65016288-65016385
ENSG00000176555.1	OR4S1	coding	chr11:48327774-48328704	ENSG00000244968.2	LIFR-AS1	lncRNA	chr5:38556887-38671318	ENSG00000207546.1	MIR548C	miRNA	chr12:65016288-65016385
ENSG00000213578.4	CPLX3	coding	chr15:75118887-75124141	ENSG00000244968.2	LIFR-AS1	lncRNA	chr5:38556887-38671318	ENSG00000207546.1	MIR548C	miRNA	chr12:65016288-65016385
ENSG00000213578.4	CPLX3	coding	chr15:75118887-75124141	ENSG00000259055.1	RP11-1140I5.1.1	lncRNA	chr14:51555674-51558006	ENSG00000207546.1	MIR548C	miRNA	chr12:65016288-65016385
ENSG00000213578.4	CPLX3	coding	chr15:75118887-75124141	ENSG00000258383.1	CTD-2200A16.1.1	lncRNA	chr14:99791135-99798352	ENSG00000207546.1	MIR548C	miRNA	chr12:65016288-65016385
ENSG00000235942.2	LCE6A	coding	chr1:152815343-152816459	ENSG00000258383.1	CTD-2200A16.1.1	lncRNA	chr14:99791135-99798352	ENSG00000207546.1	MIR548C	miRNA	chr12:65016288-65016385
ENSG00000176555.1	OR4S1	coding	chr11:48327774-48328704	ENSG00000236914.3	RP11-1008C21.2.1	lncRNA	chr15:38361681-38365160	ENSG00000207546.1	MIR548C	miRNA	chr12:65016288-65016385
ENSG00000213578.4	CPLX3	coding	chr15:75118887-75124141	ENSG00000236914.3	RP11-1008C21.2.1	lncRNA	chr15:38361681-38365160	ENSG00000207546.1	MIR548C	miRNA	chr12:65016288-65016385
ENSG00000176555.1	OR4S1	coding	chr11:48327774-48328704	ENSG00000253371.1	RP11-587H10.1.1	lncRNA	chr8:93512810-93522044	ENSG00000207546.1	MIR548C	miRNA	chr12:65016288-65016385
ENSG00000176555.1	OR4S1	coding	chr11:48327774-48328704	ENSG00000249152.1	RP11-562F9.2.1	lncRNA	chr4:93189917-93198226	ENSG00000207546.1	MIR548C	miRNA	chr12:65016288-65016385
ENSG00000176555.1	OR4S1	coding	chr11:48327774-48328704	ENSG00000234877.2	AC092660.1.1	lncRNA	chr2:78825036-78826532	ENSG00000207546.1	MIR548C	miRNA	chr12:65016288-65016385
ENSG00000256043.2	CTSO	coding	chr4:156845269-156875069	ENSG00000234877.2	AC092660.1.1	lncRNA	chr2:78825036-78826532	ENSG00000207546.1	MIR548C	miRNA	chr12:65016288-65016385
ENSG00000179919.3	OR10A7	coding	chr12:55614808-55615759	ENSG00000197462.3	AC005276.1.1	lncRNA	chr7:125557924-125573886	ENSG00000207546.1	MIR548C	miRNA	chr12:65016288-65016385
ENSG00000235942.2	LCE6A	coding	chr1:152815343-152816459	ENSG00000242385.1	LSAMP-AS4	lncRNA	chr3:116640277-116651085	ENSG00000207546.1	MIR548C	miRNA	chr12:65016288-65016385
ENSG00000176555.1	OR4S1	coding	chr11:48327774-48328704	ENSG00000249490.1	CTD-2333M24.1.1	lncRNA	chr5:20612733-20614874	ENSG00000207546.1	MIR548C	miRNA	chr12:65016288-65016385
ENSG00000179919.3	OR10A7	coding	chr12:55614808-55615759	ENSG00000249490.1	CTD-2333M24.1.1	lncRNA	chr5:20612733-20614874	ENSG00000207546.1	MIR548C	miRNA	chr12:65016288-65016385
ENSG00000176555.1	OR4S1	coding	chr11:48327774-48328704	ENSG00000231363.1	RP11-148B18.1.1	lncRNA	chr1:94713463-94715048	ENSG00000207546.1	MIR548C	miRNA	chr12:65016288-65016385
ENSG00000176555.1	OR4S1	coding	chr11:48327774-48328704	ENSG00000225070.1	LL22NC03-23C6.13.1	lncRNA	chr22:22390742-22394463	ENSG00000207546.1	MIR548C	miRNA	chr12:65016288-65016385
ENSG00000176555.1	OR4S1	coding	chr11:48327774-48328704	ENSG00000260867.1	RP11-459F6.1.1	lncRNA	chr16:58231015-58251709	ENSG00000207546.1	MIR548C	miRNA	chr12:65016288-65016385
ENSG00000176555.1	OR4S1	coding	chr11:48327774-48328704	ENSG00000261376.1	RP11-525K10.2.1	lncRNA	chr16:80213025-80214579	ENSG00000207546.1	MIR548C	miRNA	chr12:65016288-65016385
ENSG00000176555.1	OR4S1	coding	chr11:48327774-48328704	ENSG00000249458.1	RP11-624A4.1.1	lncRNA	chr4:177787767-177796611	ENSG00000207546.1	MIR548C	miRNA	chr12:65016288-65016385
ENSG00000176555.1	OR4S1	coding	chr11:48327774-48328704	ENSG00000254467.1	RP11-634B22.4.1	lncRNA	chr11:123539206-123542345	ENSG00000207546.1	MIR548C	miRNA	chr12:65016288-65016385
ENSG00000176555.1	OR4S1	coding	chr11:48327774-48328704	ENSG00000234973.1	RP11-272J7.4.1	lncRNA	chr10:44273009-44274273	ENSG00000207546.1	MIR548C	miRNA	chr12:65016288-65016385
ENSG00000176555.1	OR4S1	coding	chr11:48327774-48328704	ENSG00000250150.1	RP11-436A7.1.1	lncRNA	chr4:168228060-168229940	ENSG00000207546.1	MIR548C	miRNA	chr12:65016288-65016385
ENSG00000213578.4	CPLX3	coding	chr15:75118887-75124141	ENSG00000231718.1	RP11-382E9.1.1	lncRNA	chr1:199117725-199362435	ENSG00000207546.1	MIR548C	miRNA	chr12:65016288-65016385
ENSG00000213578.4	CPLX3	coding	chr15:75118887-75124141	ENSG00000231363.1	RP11-148B18.1.1	lncRNA	chr1:94713463-94715048	ENSG00000207546.1	MIR548C	miRNA	chr12:65016288-65016385
ENSG00000179919.3	OR10A7	coding	chr12:55614808-55615759	ENSG00000225070.1	LL22NC03-23C6.13.1	lncRNA	chr22:22390742-22394463	ENSG00000207546.1	MIR548C	miRNA	chr12:65016288-65016385
ENSG00000235942.2	LCE6A	coding	chr1:152815343-152816459	ENSG00000225070.1	LL22NC03-23C6.13.1	lncRNA	chr22:22390742-22394463	ENSG00000207546.1	MIR548C	miRNA	chr12:65016288-65016385
ENSG00000253206.1	RP11-738G5.2.1	coding	chr8:50448944-50466973	ENSG00000225070.1	LL22NC03-23C6.13.1	lncRNA	chr22:22390742-22394463	ENSG00000207546.1	MIR548C	miRNA	chr12:65016288-65016385
ENSG00000213578.4	CPLX3	coding	chr15:75118887-75124141	ENSG00000229458.2	RP11-202D18.2.1	lncRNA	chr10:83983968-83988935	ENSG00000207546.1	MIR548C	miRNA	chr12:65016288-65016385
ENSG00000221855.1	TAS2R41	coding	chr7:143174965-143175889	ENSG00000257139.1	RP11-320P7.2.1	lncRNA	chr12:70574117-70595784	ENSG00000207546.1	MIR548C	miRNA	chr12:65016288-65016385
ENSG00000179919.3	OR10A7	coding	chr12:55614808-55615759	ENSG00000225974.1	AC005550.5.1	lncRNA	chr7:15728699-15730479	ENSG00000207546.1	MIR548C	miRNA	chr12:65016288-65016385
ENSG00000213578.4	CPLX3	coding	chr15:75118887-75124141	ENSG00000250646.1	RP11-530I17.1.1	lncRNA	chr4:55919226-55958701	ENSG00000207546.1	MIR548C	miRNA	chr12:65016288-65016385
ENSG00000179919.3	OR10A7	coding	chr12:55614808-55615759	ENSG00000260867.1	RP11-459F6.1.1	lncRNA	chr16:58231015-58251709	ENSG00000207546.1	MIR548C	miRNA	chr12:65016288-65016385
ENSG00000179919.3	OR10A7	coding	chr12:55614808-55615759	ENSG00000249458.1	RP11-624A4.1.1	lncRNA	chr4:177787767-177796611	ENSG00000207546.1	MIR548C	miRNA	chr12:65016288-65016385
ENSG00000179919.3	OR10A7	coding	chr12:55614808-55615759	ENSG00000250150.1	RP11-436A7.1.1	lncRNA	chr4:168228060-168229940	ENSG00000207546.1	MIR548C	miRNA	chr12:65016288-65016385
ENSG00000253206.1	RP11-738G5.2.1	coding	chr8:50448944-50466973	ENSG00000225924.1	RP1-111D6.2.1	lncRNA	chr6:149564434-149565137	ENSG00000207546.1	MIR548C	miRNA	chr12:65016288-65016385
ENSG00000211693.2	TRGV11	coding	chr7:38331216-38331679	ENSG00000253948.1	RP11-410L14.2.1	lncRNA	chr8:100008990-100025272	ENSG00000207974.1	MIR557	miRNA	chr1:168344761-168344859
ENSG00000211693.2	TRGV11	coding	chr7:38331216-38331679	ENSG00000231774.1	RP11-402P6.11.1	lncRNA	chrX:70980624-70981509	ENSG00000207976.1	MIR607	miRNA	chr10:98588425-98588521
ENSG00000211693.2	TRGV11	coding	chr7:38331216-38331679	ENSG00000231774.1	RP11-402P6.11.1	lncRNA	chrX:70980624-70981509	ENSG00000207595.1	MIR181A2	miRNA	chr9:127454720-127454830
ENSG00000211693.2	TRGV11	coding	chr7:38331216-38331679	ENSG00000231774.1	RP11-402P6.11.1	lncRNA	chrX:70980624-70981509	ENSG00000221176.1	MIR1207	miRNA	chr8:129061397-129061484
ENSG00000211693.2	TRGV11	coding	chr7:38331216-38331679	ENSG00000260564.1	RP11-403N16.3.1	lncRNA	chr9:82503915-82506922	ENSG00000221548.1	MIR1283-2	miRNA	chr19:54261485-54261572
ENSG00000211693.2	TRGV11	coding	chr7:38331216-38331679	ENSG00000258607.1	RP11-701B16.3.1	lncRNA	chr14:60007400-60031208	ENSG00000221548.1	MIR1283-2	miRNA	chr19:54261485-54261572
ENSG00000211693.2	TRGV11	coding	chr7:38331216-38331679	ENSG00000232512.1	AP000233.2.1	lncRNA	chr21:26467334-26475983	ENSG00000221548.1	MIR1283-2	miRNA	chr19:54261485-54261572
ENSG00000211693.2	TRGV11	coding	chr7:38331216-38331679	ENSG00000225337.1	RP11-561O23.7.1	lncRNA	chr9:70922308-70923361	ENSG00000221548.1	MIR1283-2	miRNA	chr19:54261485-54261572
ENSG00000211693.2	TRGV11	coding	chr7:38331216-38331679	ENSG00000227940.1	RP11-372M18.1.1	lncRNA	chr1:209498800-209501877	ENSG00000221548.1	MIR1283-2	miRNA	chr19:54261485-54261572
ENSG00000211693.2	TRGV11	coding	chr7:38331216-38331679	ENSG00000249152.1	RP11-562F9.2.1	lncRNA	chr4:93189917-93198226	ENSG00000221548.1	MIR1283-2	miRNA	chr19:54261485-54261572
ENSG00000211693.2	TRGV11	coding	chr7:38331216-38331679	ENSG00000261598.1	RP11-107D24.2.1	lncRNA	chr15:24544895-24545785	ENSG00000221548.1	MIR1283-2	miRNA	chr19:54261485-54261572
ENSG00000211693.2	TRGV11	coding	chr7:38331216-38331679	ENSG00000232964.1	RP11-543E8.1.1	lncRNA	chr1:230728405-230731329	ENSG00000221548.1	MIR1283-2	miRNA	chr19:54261485-54261572
ENSG00000211693.2	TRGV11	coding	chr7:38331216-38331679	ENSG00000258119.1	RP11-804F13.1.1	lncRNA	chr12:38937978-38983614	ENSG00000221548.1	MIR1283-2	miRNA	chr19:54261485-54261572
ENSG00000211693.2	TRGV11	coding	chr7:38331216-38331679	ENSG00000225070.1	LL22NC03-23C6.13.1	lncRNA	chr22:22390742-22394463	ENSG00000221548.1	MIR1283-2	miRNA	chr19:54261485-54261572
ENSG00000211693.2	TRGV11	coding	chr7:38331216-38331679	ENSG00000227608.1	DCUN1D2-AS1	lncRNA	chr13:114110943-114116670	ENSG00000221548.1	MIR1283-2	miRNA	chr19:54261485-54261572
ENSG00000211693.2	TRGV11	coding	chr7:38331216-38331679	ENSG00000251336.1	RP11-540E16.2.1	lncRNA	chr4:182741171-182751126	ENSG00000221548.1	MIR1283-2	miRNA	chr19:54261485-54261572
ENSG00000211693.2	TRGV11	coding	chr7:38331216-38331679	ENSG00000253992.1	RP11-737F9.1.1	lncRNA	chr8:131947654-131961911	ENSG00000221548.1	MIR1283-2	miRNA	chr19:54261485-54261572
ENSG00000211693.2	TRGV11	coding	chr7:38331216-38331679	ENSG00000228735.1	GS1-18A18.2.1	lncRNA	chr7:54643744-54646487	ENSG00000221548.1	MIR1283-2	miRNA	chr19:54261485-54261572
ENSG00000211693.2	TRGV11	coding	chr7:38331216-38331679	ENSG00000261376.1	RP11-525K10.2.1	lncRNA	chr16:80213025-80214579	ENSG00000221548.1	MIR1283-2	miRNA	chr19:54261485-54261572
ENSG00000211693.2	TRGV11	coding	chr7:38331216-38331679	ENSG00000223344.1	RP11-541F9.1.1	lncRNA	chr1:191827836-191859359	ENSG00000221548.1	MIR1283-2	miRNA	chr19:54261485-54261572
ENSG00000211693.2	TRGV11	coding	chr7:38331216-38331679	ENSG00000258272.1	RP11-510I5.1.1	lncRNA	chr12:96816103-96879220	ENSG00000221548.1	MIR1283-2	miRNA	chr19:54261485-54261572
ENSG00000211693.2	TRGV11	coding	chr7:38331216-38331679	ENSG00000240842.1	RP11-62G11.2.1	lncRNA	chr3:69613256-69620273	ENSG00000221548.1	MIR1283-2	miRNA	chr19:54261485-54261572
ENSG00000211693.2	TRGV11	coding	chr7:38331216-38331679	ENSG00000261475.1	AC002519.4.1	lncRNA	chr16:31559010-31564904	ENSG00000221548.1	MIR1283-2	miRNA	chr19:54261485-54261572
ENSG00000211693.2	TRGV11	coding	chr7:38331216-38331679	ENSG00000240980.1	RP11-734K21.4.1	lncRNA	chr2:9283294-9286235	ENSG00000221548.1	MIR1283-2	miRNA	chr19:54261485-54261572
ENSG00000211693.2	TRGV11	coding	chr7:38331216-38331679	ENSG00000258108.1	RP11-1028N23.3.1	lncRNA	chr12:116007468-116019544	ENSG00000221548.1	MIR1283-2	miRNA	chr19:54261485-54261572
ENSG00000211693.2	TRGV11	coding	chr7:38331216-38331679	ENSG00000251024.1	RP11-203B7.1.1	lncRNA	chr4:146998997-147029309	ENSG00000221548.1	MIR1283-2	miRNA	chr19:54261485-54261572
ENSG00000211693.2	TRGV11	coding	chr7:38331216-38331679	ENSG00000258007.1	RP11-350G24.1.1	lncRNA	chr12:101432197-101432872	ENSG00000221548.1	MIR1283-2	miRNA	chr19:54261485-54261572
ENSG00000211693.2	TRGV11	coding	chr7:38331216-38331679	ENSG00000229791.1	LINC00420	lncRNA	chr13:19982181-19983669	ENSG00000221548.1	MIR1283-2	miRNA	chr19:54261485-54261572
ENSG00000211693.2	TRGV11	coding	chr7:38331216-38331679	ENSG00000260406.1	RP11-402F9.3.1	lncRNA	chr15:43594293-43594970	ENSG00000221548.1	MIR1283-2	miRNA	chr19:54261485-54261572
ENSG00000211693.2	TRGV11	coding	chr7:38331216-38331679	ENSG00000237552.1	RP11-415A20.1.1	lncRNA	chr1:77223808-77244952	ENSG00000221548.1	MIR1283-2	miRNA	chr19:54261485-54261572
ENSG00000211693.2	TRGV11	coding	chr7:38331216-38331679	ENSG00000255039.1	RP11-882G5.1.1	lncRNA	chr11:97093643-97130987	ENSG00000221548.1	MIR1283-2	miRNA	chr19:54261485-54261572
ENSG00000211693.2	TRGV11	coding	chr7:38331216-38331679	ENSG00000259107.1	CTD-2128A3.1.1	lncRNA	chr14:85860222-85886418	ENSG00000221548.1	MIR1283-2	miRNA	chr19:54261485-54261572
ENSG00000211693.2	TRGV11	coding	chr7:38331216-38331679	ENSG00000250831.1	CTD-2232E5.2.1	lncRNA	chr5:88762353-88765856	ENSG00000221548.1	MIR1283-2	miRNA	chr19:54261485-54261572
ENSG00000211693.2	TRGV11	coding	chr7:38331216-38331679	ENSG00000258723.1	RP11-332E19.2.1	lncRNA	chr14:78745914-78749719	ENSG00000221548.1	MIR1283-2	miRNA	chr19:54261485-54261572
ENSG00000211693.2	TRGV11	coding	chr7:38331216-38331679	ENSG00000261129.1	RP11-361D14.2.1	lncRNA	chr4:145427051-145430153	ENSG00000221548.1	MIR1283-2	miRNA	chr19:54261485-54261572
ENSG00000211693.2	TRGV11	coding	chr7:38331216-38331679	ENSG00000230680.2	AC004869.2.1	lncRNA	chr7:46517419-46521176	ENSG00000221548.1	MIR1283-2	miRNA	chr19:54261485-54261572
ENSG00000211693.2	TRGV11	coding	chr7:38331216-38331679	ENSG00000254001.1	RP11-91P17.1.1	lncRNA	chr8:79060335-79066148	ENSG00000221548.1	MIR1283-2	miRNA	chr19:54261485-54261572
ENSG00000211693.2	TRGV11	coding	chr7:38331216-38331679	ENSG00000261013.1	CTD-2050B12.1.1	lncRNA	chr16:56217637-56220218	ENSG00000221548.1	MIR1283-2	miRNA	chr19:54261485-54261572
ENSG00000211693.2	TRGV11	coding	chr7:38331216-38331679	ENSG00000254007.1	RP11-281H11.1.1	lncRNA	chr8:5517200-5527599	ENSG00000221548.1	MIR1283-2	miRNA	chr19:54261485-54261572
ENSG00000211693.2	TRGV11	coding	chr7:38331216-38331679	ENSG00000244968.2	LIFR-AS1	lncRNA	chr5:38556887-38671318	ENSG00000207976.1	MIR607	miRNA	chr10:98588425-98588521
ENSG00000211693.2	TRGV11	coding	chr7:38331216-38331679	ENSG00000236914.3	RP11-1008C21.2.1	lncRNA	chr15:38361681-38365160	ENSG00000207976.1	MIR607	miRNA	chr10:98588425-98588521
ENSG00000211693.2	TRGV11	coding	chr7:38331216-38331679	ENSG00000229882.1	RP13-30A9.2.1	lncRNA	chr20:61265123-61267214	ENSG00000207976.1	MIR607	miRNA	chr10:98588425-98588521
ENSG00000211693.2	TRGV11	coding	chr7:38331216-38331679	ENSG00000227090.1	AP000402.3.1	lncRNA	chr21:26258989-26275070	ENSG00000207976.1	MIR607	miRNA	chr10:98588425-98588521
ENSG00000211693.2	TRGV11	coding	chr7:38331216-38331679	ENSG00000228795.1	RP11-436F21.3.1	lncRNA	chr9:106006007-106015452	ENSG00000207976.1	MIR607	miRNA	chr10:98588425-98588521
ENSG00000211693.2	TRGV11	coding	chr7:38331216-38331679	ENSG00000229379.1	AC006041.1.1	lncRNA	chr7:15880921-15881985	ENSG00000207976.1	MIR607	miRNA	chr10:98588425-98588521
ENSG00000211693.2	TRGV11	coding	chr7:38331216-38331679	ENSG00000253403.1	RP11-348M17.2.1	lncRNA	chr5:161114352-161116414	ENSG00000207976.1	MIR607	miRNA	chr10:98588425-98588521
ENSG00000211693.2	TRGV11	coding	chr7:38331216-38331679	ENSG00000232971.1	RP11-293A10.3.1	lncRNA	chr1:109276877-109278894	ENSG00000207976.1	MIR607	miRNA	chr10:98588425-98588521
ENSG00000211693.2	TRGV11	coding	chr7:38331216-38331679	ENSG00000253992.1	RP11-737F9.1.1	lncRNA	chr8:131947654-131961911	ENSG00000207976.1	MIR607	miRNA	chr10:98588425-98588521
ENSG00000211693.2	TRGV11	coding	chr7:38331216-38331679	ENSG00000233763.1	RP1-40E16.3.1	lncRNA	chr6:3051334-3053998	ENSG00000207976.1	MIR607	miRNA	chr10:98588425-98588521
ENSG00000211693.2	TRGV11	coding	chr7:38331216-38331679	ENSG00000258108.1	RP11-1028N23.3.1	lncRNA	chr12:116007468-116019544	ENSG00000207976.1	MIR607	miRNA	chr10:98588425-98588521
ENSG00000211693.2	TRGV11	coding	chr7:38331216-38331679	ENSG00000261627.1	RP11-91I8.1.1	lncRNA	chr18:6641969-6642477	ENSG00000207976.1	MIR607	miRNA	chr10:98588425-98588521
ENSG00000211693.2	TRGV11	coding	chr7:38331216-38331679	ENSG00000229791.1	LINC00420	lncRNA	chr13:19982181-19983669	ENSG00000207976.1	MIR607	miRNA	chr10:98588425-98588521
ENSG00000211693.2	TRGV11	coding	chr7:38331216-38331679	ENSG00000244968.2	LIFR-AS1	lncRNA	chr5:38556887-38671318	ENSG00000207964.1	MIR628	miRNA	chr15:55665137-55665232
ENSG00000211693.2	TRGV11	coding	chr7:38331216-38331679	ENSG00000254007.1	RP11-281H11.1.1	lncRNA	chr8:5517200-5527599	ENSG00000207974.1	MIR557	miRNA	chr1:168344761-168344859
ENSG00000211693.2	TRGV11	coding	chr7:38331216-38331679	ENSG00000225337.1	RP11-561O23.7.1	lncRNA	chr9:70922308-70923361	ENSG00000211991.1	MIR676	miRNA	chrX:69242699-69242783
ENSG00000211693.2	TRGV11	coding	chr7:38331216-38331679	ENSG00000230975.1	AC084193.1.1	lncRNA	chr2:80926512-81097315	ENSG00000211991.1	MIR676	miRNA	chrX:69242699-69242783
ENSG00000211693.2	TRGV11	coding	chr7:38331216-38331679	ENSG00000232971.1	RP11-293A10.3.1	lncRNA	chr1:109276877-109278894	ENSG00000211991.1	MIR676	miRNA	chrX:69242699-69242783
ENSG00000211693.2	TRGV11	coding	chr7:38331216-38331679	ENSG00000227342.1	LINC00307	lncRNA	chr21:31581468-31584101	ENSG00000211991.1	MIR676	miRNA	chrX:69242699-69242783
ENSG00000211693.2	TRGV11	coding	chr7:38331216-38331679	ENSG00000237552.1	RP11-415A20.1.1	lncRNA	chr1:77223808-77244952	ENSG00000211991.1	MIR676	miRNA	chrX:69242699-69242783
ENSG00000211693.2	TRGV11	coding	chr7:38331216-38331679	ENSG00000254001.1	RP11-91P17.1.1	lncRNA	chr8:79060335-79066148	ENSG00000211991.1	MIR676	miRNA	chrX:69242699-69242783
ENSG00000211693.2	TRGV11	coding	chr7:38331216-38331679	ENSG00000236914.3	RP11-1008C21.2.1	lncRNA	chr15:38361681-38365160	ENSG00000207964.1	MIR628	miRNA	chr15:55665137-55665232
ENSG00000211693.2	TRGV11	coding	chr7:38331216-38331679	ENSG00000236914.3	RP11-1008C21.2.1	lncRNA	chr15:38361681-38365160	ENSG00000207595.1	MIR181A2	miRNA	chr9:127454720-127454830
ENSG00000211693.2	TRGV11	coding	chr7:38331216-38331679	ENSG00000236436.1	AC012361.1.1	lncRNA	chr2:21059530-21061421	ENSG00000207595.1	MIR181A2	miRNA	chr9:127454720-127454830
ENSG00000211693.2	TRGV11	coding	chr7:38331216-38331679	ENSG00000226053.1	RP5-1070A16.1.1	lncRNA	chr1:98676302-98738214	ENSG00000207595.1	MIR181A2	miRNA	chr9:127454720-127454830
ENSG00000211693.2	TRGV11	coding	chr7:38331216-38331679	ENSG00000229882.1	RP13-30A9.2.1	lncRNA	chr20:61265123-61267214	ENSG00000207595.1	MIR181A2	miRNA	chr9:127454720-127454830
ENSG00000211693.2	TRGV11	coding	chr7:38331216-38331679	ENSG00000227090.1	AP000402.3.1	lncRNA	chr21:26258989-26275070	ENSG00000207595.1	MIR181A2	miRNA	chr9:127454720-127454830
ENSG00000211693.2	TRGV11	coding	chr7:38331216-38331679	ENSG00000253427.1	RP11-103H7.1.1	lncRNA	chr8:127486433-127504841	ENSG00000221176.1	MIR1207	miRNA	chr8:129061397-129061484
ENSG00000211693.2	TRGV11	coding	chr7:38331216-38331679	ENSG00000237626.1	RP11-406A20.1.1	lncRNA	chr9:92740563-92749768	ENSG00000207595.1	MIR181A2	miRNA	chr9:127454720-127454830
ENSG00000211693.2	TRGV11	coding	chr7:38331216-38331679	ENSG00000228795.1	RP11-436F21.3.1	lncRNA	chr9:106006007-106015452	ENSG00000207595.1	MIR181A2	miRNA	chr9:127454720-127454830
ENSG00000211693.2	TRGV11	coding	chr7:38331216-38331679	ENSG00000228795.1	RP11-436F21.3.1	lncRNA	chr9:106006007-106015452	ENSG00000221176.1	MIR1207	miRNA	chr8:129061397-129061484
ENSG00000211693.2	TRGV11	coding	chr7:38331216-38331679	ENSG00000229379.1	AC006041.1.1	lncRNA	chr7:15880921-15881985	ENSG00000207595.1	MIR181A2	miRNA	chr9:127454720-127454830
ENSG00000211693.2	TRGV11	coding	chr7:38331216-38331679	ENSG00000253403.1	RP11-348M17.2.1	lncRNA	chr5:161114352-161116414	ENSG00000207595.1	MIR181A2	miRNA	chr9:127454720-127454830
ENSG00000211693.2	TRGV11	coding	chr7:38331216-38331679	ENSG00000227940.1	RP11-372M18.1.1	lncRNA	chr1:209498800-209501877	ENSG00000207964.1	MIR628	miRNA	chr15:55665137-55665232
ENSG00000211693.2	TRGV11	coding	chr7:38331216-38331679	ENSG00000251448.1	RP11-71E19.2.1	lncRNA	chr3:126007709-126012867	ENSG00000207964.1	MIR628	miRNA	chr15:55665137-55665232
ENSG00000211693.2	TRGV11	coding	chr7:38331216-38331679	ENSG00000251448.1	RP11-71E19.2.1	lncRNA	chr3:126007709-126012867	ENSG00000207595.1	MIR181A2	miRNA	chr9:127454720-127454830
ENSG00000211693.2	TRGV11	coding	chr7:38331216-38331679	ENSG00000232971.1	RP11-293A10.3.1	lncRNA	chr1:109276877-109278894	ENSG00000207964.1	MIR628	miRNA	chr15:55665137-55665232
ENSG00000211693.2	TRGV11	coding	chr7:38331216-38331679	ENSG00000228735.1	GS1-18A18.2.1	lncRNA	chr7:54643744-54646487	ENSG00000207964.1	MIR628	miRNA	chr15:55665137-55665232
ENSG00000211693.2	TRGV11	coding	chr7:38331216-38331679	ENSG00000258119.1	RP11-804F13.1.1	lncRNA	chr12:38937978-38983614	ENSG00000221176.1	MIR1207	miRNA	chr8:129061397-129061484
ENSG00000211693.2	TRGV11	coding	chr7:38331216-38331679	ENSG00000256341.1	RP11-21A7A.3.1	lncRNA	chr11:63885743-63886682	ENSG00000207595.1	MIR181A2	miRNA	chr9:127454720-127454830
ENSG00000211693.2	TRGV11	coding	chr7:38331216-38331679	ENSG00000255427.1	RP11-350D17.2.1	lncRNA	chr11:34592422-34595529	ENSG00000221176.1	MIR1207	miRNA	chr8:129061397-129061484
ENSG00000211693.2	TRGV11	coding	chr7:38331216-38331679	ENSG00000227342.1	LINC00307	lncRNA	chr21:31581468-31584101	ENSG00000221176.1	MIR1207	miRNA	chr8:129061397-129061484
ENSG00000017427.11	IGF1	coding	chr12:102789644-102874423	ENSG00000236335.1	RP4-591L5.1.1	lncRNA	chr1:30882406-30884485	ENSG00000207654.1	MIR128-1	miRNA	chr2:136422966-136423048
ENSG00000017427.11	IGF1	coding	chr12:102789644-102874423	ENSG00000231487.1	AP006285.7.1	lncRNA	chr11:1683813-1684573	ENSG00000207654.1	MIR128-1	miRNA	chr2:136422966-136423048
ENSG00000013275.2	PSMC4	coding	chr19:40477072-40487351	ENSG00000248567.1	RP11-545L5.1.1	lncRNA	chr4:72687021-72689697	ENSG00000207654.1	MIR128-1	miRNA	chr2:136422966-136423048
ENSG00000013275.2	PSMC4	coding	chr19:40477072-40487351	ENSG00000236335.1	RP4-591L5.1.1	lncRNA	chr1:30882406-30884485	ENSG00000207654.1	MIR128-1	miRNA	chr2:136422966-136423048
ENSG00000013275.2	PSMC4	coding	chr19:40477072-40487351	ENSG00000231487.1	AP006285.7.1	lncRNA	chr11:1683813-1684573	ENSG00000207654.1	MIR128-1	miRNA	chr2:136422966-136423048
ENSG00000013275.2	PSMC4	coding	chr19:40477072-40487351	ENSG00000256341.1	RP11-21A7A.3.1	lncRNA	chr11:63885743-63886682	ENSG00000207654.1	MIR128-1	miRNA	chr2:136422966-136423048
ENSG00000013275.2	PSMC4	coding	chr19:40477072-40487351	ENSG00000260564.1	RP11-403N16.3.1	lncRNA	chr9:82503915-82506922	ENSG00000207729.1	MIR556	miRNA	chr1:162312335-162312430
ENSG00000013275.2	PSMC4	coding	chr19:40477072-40487351	ENSG00000235242.1	AC010982.2.1	lncRNA	chr2:114879850-114880870	ENSG00000207729.1	MIR556	miRNA	chr1:162312335-162312430
ENSG00000013275.2	PSMC4	coding	chr19:40477072-40487351	ENSG00000227016.1	RP11-262K1.1.1	lncRNA	chr1:73240953-73256963	ENSG00000208017.1	MIR140	miRNA	chr16:69966983-69967083
ENSG00000076604.8	TRAF4	coding	chr17:27071035-27077974	ENSG00000176728.3	TTTY14	lncRNA	chrY:21034386-21239302	ENSG00000207775.1	MIR548A1	miRNA	chr6:18572014-18572111
ENSG00000076604.8	TRAF4	coding	chr17:27071035-27077974	ENSG00000176728.3	TTTY14	lncRNA	chrY:21034386-21239302	ENSG00000207838.1	MIR517C	miRNA	chr19:54244566-54244661
ENSG00000076604.8	TRAF4	coding	chr17:27071035-27077974	ENSG00000170590.4	LINC00266-3	lncRNA	chr6:131909-144885	ENSG00000207775.1	MIR548A1	miRNA	chr6:18572014-18572111
ENSG00000076604.8	TRAF4	coding	chr17:27071035-27077974	ENSG00000170590.4	LINC00266-3	lncRNA	chr6:131909-144885	ENSG00000207838.1	MIR517C	miRNA	chr19:54244566-54244661
ENSG00000104177.12	MYEF2	coding	chr15:48431624-48470714	ENSG00000236169.1	RP11-38M15.3.1	lncRNA	chr13:19292906-19293869	ENSG00000209707.1	MIR24-2	miRNA	chr19:13947100-13947173
ENSG00000039068.11	CDH1	coding	chr16:68771127-68869445	ENSG00000236335.1	RP4-591L5.1.1	lncRNA	chr1:30882406-30884485	ENSG00000207654.1	MIR128-1	miRNA	chr2:136422966-136423048
ENSG00000039068.11	CDH1	coding	chr16:68771127-68869445	ENSG00000231487.1	AP006285.7.1	lncRNA	chr11:1683813-1684573	ENSG00000207654.1	MIR128-1	miRNA	chr2:136422966-136423048
ENSG00000039068.11	CDH1	coding	chr16:68771127-68869445	ENSG00000233574.1	CTA-929C8.5.1	lncRNA	chr22:27672200-27682310	ENSG00000207654.1	MIR128-1	miRNA	chr2:136422966-136423048
ENSG00000039068.11	CDH1	coding	chr16:68771127-68869445	ENSG00000257084.1	U47924.27.1	lncRNA	chr12:7072408-7073610	ENSG00000207654.1	MIR128-1	miRNA	chr2:136422966-136423048
ENSG00000039068.11	CDH1	coding	chr16:68771127-68869445	ENSG00000231487.1	AP006285.7.1	lncRNA	chr11:1683813-1684573	ENSG00000199161.1	MIR126	miRNA	chr9:139565053-139565138
ENSG00000261421.1	RP11-22D3.1.1	coding	chr16:49193418-49195934	ENSG00000236601.1	RP4-669L17.2.1	lncRNA	chr1:453632-460480	ENSG00000211578.1	MIR766	miRNA	chrX:118780700-118780811
ENSG00000261421.1	RP11-22D3.1.1	coding	chr16:49193418-49195934	ENSG00000236601.1	RP4-669L17.2.1	lncRNA	chr1:453632-460480	ENSG00000221033.1	MIR1272	miRNA	chr15:65054585-65054714
ENSG00000183632.10	TP53TG3	coding	chr16:32684851-32688053	ENSG00000257725.1	RP11-654D12.3.1	lncRNA	chr12:90341469-90343503	ENSG00000207654.1	MIR128-1	miRNA	chr2:136422966-136423048
ENSG00000182824.6	AC008132.1	coding	chr22:18721426-18745407	ENSG00000229118.1	AC068491.2.1	lncRNA	chr2:112022859-112037457	ENSG00000207654.1	MIR128-1	miRNA	chr2:136422966-136423048
ENSG00000182824.6	AC008132.1	coding	chr22:18721426-18745407	ENSG00000226497.1	RP11-406O16.1.1	lncRNA	chr6:68936863-69039791	ENSG00000207654.1	MIR128-1	miRNA	chr2:136422966-136423048
ENSG00000087470.12	DNM1L	coding	chr12:32832133-32905700	ENSG00000236335.1	RP4-591L5.1.1	lncRNA	chr1:30882406-30884485	ENSG00000207654.1	MIR128-1	miRNA	chr2:136422966-136423048
ENSG00000087470.12	DNM1L	coding	chr12:32832133-32905700	ENSG00000231487.1	AP006285.7.1	lncRNA	chr11:1683813-1684573	ENSG00000207654.1	MIR128-1	miRNA	chr2:136422966-136423048
ENSG00000198657.3	OR8B4	coding	chr11:124293806-124294789	ENSG00000232512.1	AP000233.2.1	lncRNA	chr21:26467334-26475983	ENSG00000207654.1	MIR128-1	miRNA	chr2:136422966-136423048
ENSG00000198657.3	OR8B4	coding	chr11:124293806-124294789	ENSG00000236151.1	RP5-1100I6.1.1	lncRNA	chr20:24123225-24125022	ENSG00000207654.1	MIR128-1	miRNA	chr2:136422966-136423048
ENSG00000198657.3	OR8B4	coding	chr11:124293806-124294789	ENSG00000225321.1	RP5-828K20.2.1	lncRNA	chr20:22260865-22263310	ENSG00000207654.1	MIR128-1	miRNA	chr2:136422966-136423048
ENSG00000198657.3	OR8B4	coding	chr11:124293806-124294789	ENSG00000233574.1	CTA-929C8.5.1	lncRNA	chr22:27672200-27682310	ENSG00000207654.1	MIR128-1	miRNA	chr2:136422966-136423048
ENSG00000198657.3	OR8B4	coding	chr11:124293806-124294789	ENSG00000228608.1	RP3-399C22.1.1	lncRNA	chr20:59049458-59055732	ENSG00000207654.1	MIR128-1	miRNA	chr2:136422966-136423048
ENSG00000198657.3	OR8B4	coding	chr11:124293806-124294789	ENSG00000227466.1	RP11-397C12.1.1	lncRNA	chr1:66508182-66516401	ENSG00000207654.1	MIR128-1	miRNA	chr2:136422966-136423048
ENSG00000198657.3	OR8B4	coding	chr11:124293806-124294789	ENSG00000233835.1	RP1-92C4.2.1	lncRNA	chr6:80581589-80584327	ENSG00000207654.1	MIR128-1	miRNA	chr2:136422966-136423048
ENSG00000198657.3	OR8B4	coding	chr11:124293806-124294789	ENSG00000248184.1	RP11-231C18.1.1	lncRNA	chr4:55199058-55222121	ENSG00000207654.1	MIR128-1	miRNA	chr2:136422966-136423048
ENSG00000198657.3	OR8B4	coding	chr11:124293806-124294789	ENSG00000232661.1	AC000111.3.1	lncRNA	chr7:117200786-117204730	ENSG00000207654.1	MIR128-1	miRNA	chr2:136422966-136423048
ENSG00000198657.3	OR8B4	coding	chr11:124293806-124294789	ENSG00000254625.1	GS1-24F4.3.1	lncRNA	chr8:6786129-6787995	ENSG00000207654.1	MIR128-1	miRNA	chr2:136422966-136423048
ENSG00000198657.3	OR8B4	coding	chr11:124293806-124294789	ENSG00000249061.1	RP11-72L22.1.1	lncRNA	chr5:86263137-86433529	ENSG00000207654.1	MIR128-1	miRNA	chr2:136422966-136423048
ENSG00000237247.2	MBD3L5	coding	chr19:7030588-7033053	ENSG00000254580.1	RP11-677I18.4.1	lncRNA	chr11:105983185-106002843	ENSG00000207654.1	MIR128-1	miRNA	chr2:136422966-136423048
ENSG00000211879.1	TRAJ10	coding	chr14:23002444-23002508	ENSG00000248567.1	RP11-545L5.1.1	lncRNA	chr4:72687021-72689697	ENSG00000207654.1	MIR128-1	miRNA	chr2:136422966-136423048
ENSG00000211879.1	TRAJ10	coding	chr14:23002444-23002508	ENSG00000236151.1	RP5-1100I6.1.1	lncRNA	chr20:24123225-24125022	ENSG00000207654.1	MIR128-1	miRNA	chr2:136422966-136423048
ENSG00000211879.1	TRAJ10	coding	chr14:23002444-23002508	ENSG00000261790.1	AC005606.14.1	lncRNA	chr16:2034877-2040358	ENSG00000207654.1	MIR128-1	miRNA	chr2:136422966-136423048
ENSG00000211879.1	TRAJ10	coding	chr14:23002444-23002508	ENSG00000236335.1	RP4-591L5.1.1	lncRNA	chr1:30882406-30884485	ENSG00000207654.1	MIR128-1	miRNA	chr2:136422966-136423048
ENSG00000211879.1	TRAJ10	coding	chr14:23002444-23002508	ENSG00000227223.1	RP11-23O13.1.1	lncRNA	chr20:20702316-20703034	ENSG00000207654.1	MIR128-1	miRNA	chr2:136422966-136423048
ENSG00000211879.1	TRAJ10	coding	chr14:23002444-23002508	ENSG00000253427.1	RP11-103H7.1.1	lncRNA	chr8:127486433-127504841	ENSG00000207654.1	MIR128-1	miRNA	chr2:136422966-136423048
ENSG00000211879.1	TRAJ10	coding	chr14:23002444-23002508	ENSG00000225321.1	RP5-828K20.2.1	lncRNA	chr20:22260865-22263310	ENSG00000207654.1	MIR128-1	miRNA	chr2:136422966-136423048
ENSG00000211879.1	TRAJ10	coding	chr14:23002444-23002508	ENSG00000229118.1	AC068491.2.1	lncRNA	chr2:112022859-112037457	ENSG00000207654.1	MIR128-1	miRNA	chr2:136422966-136423048
ENSG00000211879.1	TRAJ10	coding	chr14:23002444-23002508	ENSG00000231487.1	AP006285.7.1	lncRNA	chr11:1683813-1684573	ENSG00000207654.1	MIR128-1	miRNA	chr2:136422966-136423048
ENSG00000211879.1	TRAJ10	coding	chr14:23002444-23002508	ENSG00000233574.1	CTA-929C8.5.1	lncRNA	chr22:27672200-27682310	ENSG00000207654.1	MIR128-1	miRNA	chr2:136422966-136423048
ENSG00000211879.1	TRAJ10	coding	chr14:23002444-23002508	ENSG00000248518.1	RP11-231C18.2.1	lncRNA	chr4:55242168-55242919	ENSG00000207654.1	MIR128-1	miRNA	chr2:136422966-136423048
ENSG00000211879.1	TRAJ10	coding	chr14:23002444-23002508	ENSG00000228608.1	RP3-399C22.1.1	lncRNA	chr20:59049458-59055732	ENSG00000207654.1	MIR128-1	miRNA	chr2:136422966-136423048
ENSG00000211879.1	TRAJ10	coding	chr14:23002444-23002508	ENSG00000253275.1	RP11-566H8.1.1	lncRNA	chr8:31354938-31356128	ENSG00000207654.1	MIR128-1	miRNA	chr2:136422966-136423048
ENSG00000211879.1	TRAJ10	coding	chr14:23002444-23002508	ENSG00000228865.1	RP11-463P17.3.1	lncRNA	chr10:48357925-48358600	ENSG00000207654.1	MIR128-1	miRNA	chr2:136422966-136423048
ENSG00000211879.1	TRAJ10	coding	chr14:23002444-23002508	ENSG00000254619.1	RP11-646J21.4.1	lncRNA	chr11:33831690-33832724	ENSG00000207654.1	MIR128-1	miRNA	chr2:136422966-136423048
ENSG00000211879.1	TRAJ10	coding	chr14:23002444-23002508	ENSG00000248029.2	CTD-2313F11.3.1	lncRNA	chr5:54359006-54362058	ENSG00000207654.1	MIR128-1	miRNA	chr2:136422966-136423048
ENSG00000211879.1	TRAJ10	coding	chr14:23002444-23002508	ENSG00000229025.1	AP001595.1.1	lncRNA	chr21:27722098-27722953	ENSG00000207654.1	MIR128-1	miRNA	chr2:136422966-136423048
ENSG00000211879.1	TRAJ10	coding	chr14:23002444-23002508	ENSG00000237337.1	RP11-567C20.2.1	lncRNA	chr1:50639977-50641540	ENSG00000207654.1	MIR128-1	miRNA	chr2:136422966-136423048
ENSG00000211879.1	TRAJ10	coding	chr14:23002444-23002508	ENSG00000254160.1	CTD-2281E23.3.1	lncRNA	chr8:1196788-1198760	ENSG00000207654.1	MIR128-1	miRNA	chr2:136422966-136423048
ENSG00000211879.1	TRAJ10	coding	chr14:23002444-23002508	ENSG00000233835.1	RP1-92C4.2.1	lncRNA	chr6:80581589-80584327	ENSG00000207654.1	MIR128-1	miRNA	chr2:136422966-136423048
ENSG00000211879.1	TRAJ10	coding	chr14:23002444-23002508	ENSG00000228105.1	RP3-340N1.6.1	lncRNA	chr1:20569587-20571148	ENSG00000207654.1	MIR128-1	miRNA	chr2:136422966-136423048
ENSG00000211879.1	TRAJ10	coding	chr14:23002444-23002508	ENSG00000260041.1	RP11-355E10.1.1	lncRNA	chr16:56143448-56170912	ENSG00000207654.1	MIR128-1	miRNA	chr2:136422966-136423048
ENSG00000211879.1	TRAJ10	coding	chr14:23002444-23002508	ENSG00000225759.1	LINC00489	lncRNA	chr20:36247699-36251521	ENSG00000207654.1	MIR128-1	miRNA	chr2:136422966-136423048
ENSG00000211879.1	TRAJ10	coding	chr14:23002444-23002508	ENSG00000248184.1	RP11-231C18.1.1	lncRNA	chr4:55199058-55222121	ENSG00000207654.1	MIR128-1	miRNA	chr2:136422966-136423048
ENSG00000211879.1	TRAJ10	coding	chr14:23002444-23002508	ENSG00000259813.1	RP5-1142A6.5.1	lncRNA	chr16:88762908-88765018	ENSG00000207654.1	MIR128-1	miRNA	chr2:136422966-136423048
ENSG00000211879.1	TRAJ10	coding	chr14:23002444-23002508	ENSG00000248440.1	RP11-231G15.1.1	lncRNA	chr5:108833577-108834809	ENSG00000207654.1	MIR128-1	miRNA	chr2:136422966-136423048
ENSG00000099341.5	PSMD8	coding	chr19:38865175-38874464	ENSG00000236335.1	RP4-591L5.1.1	lncRNA	chr1:30882406-30884485	ENSG00000207654.1	MIR128-1	miRNA	chr2:136422966-136423048
ENSG00000099341.5	PSMD8	coding	chr19:38865175-38874464	ENSG00000231487.1	AP006285.7.1	lncRNA	chr11:1683813-1684573	ENSG00000207654.1	MIR128-1	miRNA	chr2:136422966-136423048
ENSG00000082805.12	ERC1	coding	chr12:1099674-1605090	ENSG00000236335.1	RP4-591L5.1.1	lncRNA	chr1:30882406-30884485	ENSG00000207654.1	MIR128-1	miRNA	chr2:136422966-136423048
ENSG00000082805.12	ERC1	coding	chr12:1099674-1605090	ENSG00000231487.1	AP006285.7.1	lncRNA	chr11:1683813-1684573	ENSG00000207654.1	MIR128-1	miRNA	chr2:136422966-136423048
ENSG00000183632.10	TP53TG3	coding	chr16:32684851-32688053	ENSG00000232512.1	AP000233.2.1	lncRNA	chr21:26467334-26475983	ENSG00000207654.1	MIR128-1	miRNA	chr2:136422966-136423048
ENSG00000183632.10	TP53TG3	coding	chr16:32684851-32688053	ENSG00000236335.1	RP4-591L5.1.1	lncRNA	chr1:30882406-30884485	ENSG00000207654.1	MIR128-1	miRNA	chr2:136422966-136423048
ENSG00000183632.10	TP53TG3	coding	chr16:32684851-32688053	ENSG00000254921.1	RP11-236J17.6.1	lncRNA	chr11:8056992-8061265	ENSG00000207654.1	MIR128-1	miRNA	chr2:136422966-136423048
ENSG00000183632.10	TP53TG3	coding	chr16:32684851-32688053	ENSG00000253427.1	RP11-103H7.1.1	lncRNA	chr8:127486433-127504841	ENSG00000207654.1	MIR128-1	miRNA	chr2:136422966-136423048
ENSG00000183632.10	TP53TG3	coding	chr16:32684851-32688053	ENSG00000255032.1	RP11-45A12.2.1	lncRNA	chr11:44740941-44758242	ENSG00000207654.1	MIR128-1	miRNA	chr2:136422966-136423048
ENSG00000183632.10	TP53TG3	coding	chr16:32684851-32688053	ENSG00000223446.1	RP11-274J16.5.1	lncRNA	chr9:95857220-95857811	ENSG00000207654.1	MIR128-1	miRNA	chr2:136422966-136423048
ENSG00000183632.10	TP53TG3	coding	chr16:32684851-32688053	ENSG00000225775.1	RP11-354I10.1.1	lncRNA	chr6:9124453-9162010	ENSG00000207654.1	MIR128-1	miRNA	chr2:136422966-136423048
ENSG00000183632.10	TP53TG3	coding	chr16:32684851-32688053	ENSG00000227880.1	RP11-46E17.6.1	lncRNA	chr22:27853207-27856021	ENSG00000207654.1	MIR128-1	miRNA	chr2:136422966-136423048
ENSG00000183632.10	TP53TG3	coding	chr16:32684851-32688053	ENSG00000229118.1	AC068491.2.1	lncRNA	chr2:112022859-112037457	ENSG00000207654.1	MIR128-1	miRNA	chr2:136422966-136423048
ENSG00000183632.10	TP53TG3	coding	chr16:32684851-32688053	ENSG00000231487.1	AP006285.7.1	lncRNA	chr11:1683813-1684573	ENSG00000207654.1	MIR128-1	miRNA	chr2:136422966-136423048
ENSG00000183632.10	TP53TG3	coding	chr16:32684851-32688053	ENSG00000233574.1	CTA-929C8.5.1	lncRNA	chr22:27672200-27682310	ENSG00000207654.1	MIR128-1	miRNA	chr2:136422966-136423048
ENSG00000183632.10	TP53TG3	coding	chr16:32684851-32688053	ENSG00000256341.1	RP11-21A7A.3.1	lncRNA	chr11:63885743-63886682	ENSG00000207654.1	MIR128-1	miRNA	chr2:136422966-136423048
ENSG00000183632.10	TP53TG3	coding	chr16:32684851-32688053	ENSG00000244472.1	RP1-302D9.4.1	lncRNA	chr22:33562372-33617737	ENSG00000207654.1	MIR128-1	miRNA	chr2:136422966-136423048
ENSG00000183632.10	TP53TG3	coding	chr16:32684851-32688053	ENSG00000225316.1	LINC00350	lncRNA	chr13:20161257-20162490	ENSG00000207654.1	MIR128-1	miRNA	chr2:136422966-136423048
ENSG00000183632.10	TP53TG3	coding	chr16:32684851-32688053	ENSG00000226717.1	RP11-87N24.2.1	lncRNA	chr9:10613201-10618218	ENSG00000207654.1	MIR128-1	miRNA	chr2:136422966-136423048
ENSG00000183632.10	TP53TG3	coding	chr16:32684851-32688053	ENSG00000248876.1	RP11-231G15.3.1	lncRNA	chr5:108806543-108807287	ENSG00000207654.1	MIR128-1	miRNA	chr2:136422966-136423048
ENSG00000183632.10	TP53TG3	coding	chr16:32684851-32688053	ENSG00000232661.1	AC000111.3.1	lncRNA	chr7:117200786-117204730	ENSG00000207654.1	MIR128-1	miRNA	chr2:136422966-136423048
ENSG00000183632.10	TP53TG3	coding	chr16:32684851-32688053	ENSG00000258393.1	RP11-907D1.2.1	lncRNA	chr14:97582691-97587838	ENSG00000207654.1	MIR128-1	miRNA	chr2:136422966-136423048
ENSG00000183632.10	TP53TG3	coding	chr16:32684851-32688053	ENSG00000232548.1	AC010744.1.1	lncRNA	chr2:83749937-83750626	ENSG00000207654.1	MIR128-1	miRNA	chr2:136422966-136423048
ENSG00000183632.10	TP53TG3	coding	chr16:32684851-32688053	ENSG00000250259.1	RP11-460I19.2.1	lncRNA	chr4:1021465-1022760	ENSG00000207654.1	MIR128-1	miRNA	chr2:136422966-136423048
ENSG00000183632.10	TP53TG3	coding	chr16:32684851-32688053	ENSG00000254830.1	RP11-99C10.1.1	lncRNA	chr11:98809641-98815809	ENSG00000207654.1	MIR128-1	miRNA	chr2:136422966-136423048
ENSG00000124659.4	TBCC	coding	chr6:42712218-42714558	ENSG00000236335.1	RP4-591L5.1.1	lncRNA	chr1:30882406-30884485	ENSG00000207654.1	MIR128-1	miRNA	chr2:136422966-136423048
ENSG00000124659.4	TBCC	coding	chr6:42712218-42714558	ENSG00000231487.1	AP006285.7.1	lncRNA	chr11:1683813-1684573	ENSG00000207654.1	MIR128-1	miRNA	chr2:136422966-136423048
ENSG00000074266.10	EED	coding	chr11:85955585-85989781	ENSG00000232512.1	AP000233.2.1	lncRNA	chr21:26467334-26475983	ENSG00000207654.1	MIR128-1	miRNA	chr2:136422966-136423048
ENSG00000074266.10	EED	coding	chr11:85955585-85989781	ENSG00000236335.1	RP4-591L5.1.1	lncRNA	chr1:30882406-30884485	ENSG00000207654.1	MIR128-1	miRNA	chr2:136422966-136423048
ENSG00000074266.10	EED	coding	chr11:85955585-85989781	ENSG00000231487.1	AP006285.7.1	lncRNA	chr11:1683813-1684573	ENSG00000207654.1	MIR128-1	miRNA	chr2:136422966-136423048
ENSG00000074266.10	EED	coding	chr11:85955585-85989781	ENSG00000225316.1	LINC00350	lncRNA	chr13:20161257-20162490	ENSG00000207654.1	MIR128-1	miRNA	chr2:136422966-136423048
ENSG00000237247.2	MBD3L5	coding	chr19:7030588-7033053	ENSG00000229546.1	RP11-366O17.3.1	lncRNA	chr13:43416549-43417023	ENSG00000207654.1	MIR128-1	miRNA	chr2:136422966-136423048
ENSG00000089022.8	MAPKAPK5	coding	chr12:112279781-112334343	ENSG00000236335.1	RP4-591L5.1.1	lncRNA	chr1:30882406-30884485	ENSG00000207654.1	MIR128-1	miRNA	chr2:136422966-136423048
ENSG00000089022.8	MAPKAPK5	coding	chr12:112279781-112334343	ENSG00000231487.1	AP006285.7.1	lncRNA	chr11:1683813-1684573	ENSG00000207654.1	MIR128-1	miRNA	chr2:136422966-136423048
ENSG00000105323.10	HNRNPUL1	coding	chr19:41768390-41813811	ENSG00000236335.1	RP4-591L5.1.1	lncRNA	chr1:30882406-30884485	ENSG00000207654.1	MIR128-1	miRNA	chr2:136422966-136423048
ENSG00000105323.10	HNRNPUL1	coding	chr19:41768390-41813811	ENSG00000231487.1	AP006285.7.1	lncRNA	chr11:1683813-1684573	ENSG00000207654.1	MIR128-1	miRNA	chr2:136422966-136423048
ENSG00000176134.4	AL445665.1	coding	chr9:69650262-69660358	ENSG00000232512.1	AP000233.2.1	lncRNA	chr21:26467334-26475983	ENSG00000207654.1	MIR128-1	miRNA	chr2:136422966-136423048
ENSG00000182645.4	C10orf96	coding	chr10:118083939-118139541	ENSG00000232512.1	AP000233.2.1	lncRNA	chr21:26467334-26475983	ENSG00000207654.1	MIR128-1	miRNA	chr2:136422966-136423048
ENSG00000184394.1	OR4N5	coding	chr14:20611894-20612821	ENSG00000248567.1	RP11-545L5.1.1	lncRNA	chr4:72687021-72689697	ENSG00000207654.1	MIR128-1	miRNA	chr2:136422966-136423048
ENSG00000184394.1	OR4N5	coding	chr14:20611894-20612821	ENSG00000236151.1	RP5-1100I6.1.1	lncRNA	chr20:24123225-24125022	ENSG00000207654.1	MIR128-1	miRNA	chr2:136422966-136423048
ENSG00000182645.4	C10orf96	coding	chr10:118083939-118139541	ENSG00000236151.1	RP5-1100I6.1.1	lncRNA	chr20:24123225-24125022	ENSG00000207654.1	MIR128-1	miRNA	chr2:136422966-136423048
ENSG00000124535.10	WRNIP1	coding	chr6:2765647-2786927	ENSG00000236335.1	RP4-591L5.1.1	lncRNA	chr1:30882406-30884485	ENSG00000207654.1	MIR128-1	miRNA	chr2:136422966-136423048
ENSG00000103342.8	GSPT1	coding	chr16:11961984-12009939	ENSG00000236335.1	RP4-591L5.1.1	lncRNA	chr1:30882406-30884485	ENSG00000207654.1	MIR128-1	miRNA	chr2:136422966-136423048
ENSG00000158526.7	TSR2	coding	chrX:54466833-54471920	ENSG00000236335.1	RP4-591L5.1.1	lncRNA	chr1:30882406-30884485	ENSG00000207654.1	MIR128-1	miRNA	chr2:136422966-136423048
ENSG00000204256.6	BRD2	coding	chr6:32936436-32949282	ENSG00000236335.1	RP4-591L5.1.1	lncRNA	chr1:30882406-30884485	ENSG00000207654.1	MIR128-1	miRNA	chr2:136422966-136423048
ENSG00000162892.11	IL24	coding	chr1:207070787-207077484	ENSG00000236335.1	RP4-591L5.1.1	lncRNA	chr1:30882406-30884485	ENSG00000207654.1	MIR128-1	miRNA	chr2:136422966-136423048
ENSG00000184394.1	OR4N5	coding	chr14:20611894-20612821	ENSG00000227223.1	RP11-23O13.1.1	lncRNA	chr20:20702316-20703034	ENSG00000207654.1	MIR128-1	miRNA	chr2:136422966-136423048
ENSG00000176134.4	AL445665.1	coding	chr9:69650262-69660358	ENSG00000254921.1	RP11-236J17.6.1	lncRNA	chr11:8056992-8061265	ENSG00000207654.1	MIR128-1	miRNA	chr2:136422966-136423048
ENSG00000205883.2	DEFB135	coding	chr8:11839829-11842099	ENSG00000248518.1	RP11-231C18.2.1	lncRNA	chr4:55242168-55242919	ENSG00000207654.1	MIR128-1	miRNA	chr2:136422966-136423048
ENSG00000176787.2	OR52E2	coding	chr11:5079879-5080857	ENSG00000236897.1	AC113331.9.1	lncRNA	chr11:5127291-5128760	ENSG00000207654.1	MIR128-1	miRNA	chr2:136422966-136423048
ENSG00000186306.1	OR10T2	coding	chr1:158368311-158369256	ENSG00000225321.1	RP5-828K20.2.1	lncRNA	chr20:22260865-22263310	ENSG00000207654.1	MIR128-1	miRNA	chr2:136422966-136423048
ENSG00000182645.4	C10orf96	coding	chr10:118083939-118139541	ENSG00000225321.1	RP5-828K20.2.1	lncRNA	chr20:22260865-22263310	ENSG00000207654.1	MIR128-1	miRNA	chr2:136422966-136423048
ENSG00000204495.3	PRAMEF13	coding	chr1:13447413-13452656	ENSG00000227880.1	RP11-46E17.6.1	lncRNA	chr22:27853207-27856021	ENSG00000207654.1	MIR128-1	miRNA	chr2:136422966-136423048
ENSG00000124535.10	WRNIP1	coding	chr6:2765647-2786927	ENSG00000231487.1	AP006285.7.1	lncRNA	chr11:1683813-1684573	ENSG00000207654.1	MIR128-1	miRNA	chr2:136422966-136423048
ENSG00000103342.8	GSPT1	coding	chr16:11961984-12009939	ENSG00000231487.1	AP006285.7.1	lncRNA	chr11:1683813-1684573	ENSG00000207654.1	MIR128-1	miRNA	chr2:136422966-136423048
ENSG00000158526.7	TSR2	coding	chrX:54466833-54471920	ENSG00000231487.1	AP006285.7.1	lncRNA	chr11:1683813-1684573	ENSG00000207654.1	MIR128-1	miRNA	chr2:136422966-136423048
ENSG00000204256.6	BRD2	coding	chr6:32936436-32949282	ENSG00000231487.1	AP006285.7.1	lncRNA	chr11:1683813-1684573	ENSG00000207654.1	MIR128-1	miRNA	chr2:136422966-136423048
ENSG00000162892.11	IL24	coding	chr1:207070787-207077484	ENSG00000231487.1	AP006285.7.1	lncRNA	chr11:1683813-1684573	ENSG00000207654.1	MIR128-1	miRNA	chr2:136422966-136423048
ENSG00000176134.4	AL445665.1	coding	chr9:69650262-69660358	ENSG00000248518.1	RP11-231C18.2.1	lncRNA	chr4:55242168-55242919	ENSG00000207654.1	MIR128-1	miRNA	chr2:136422966-136423048
ENSG00000181761.5	OR8H3	coding	chr11:55889848-55890787	ENSG00000248518.1	RP11-231C18.2.1	lncRNA	chr4:55242168-55242919	ENSG00000207654.1	MIR128-1	miRNA	chr2:136422966-136423048
ENSG00000253314.1	LINC00293	coding	chr8:47733858-47765929	ENSG00000248518.1	RP11-231C18.2.1	lncRNA	chr4:55242168-55242919	ENSG00000207654.1	MIR128-1	miRNA	chr2:136422966-136423048
ENSG00000204495.3	PRAMEF13	coding	chr1:13447413-13452656	ENSG00000228865.1	RP11-463P17.3.1	lncRNA	chr10:48357925-48358600	ENSG00000207654.1	MIR128-1	miRNA	chr2:136422966-136423048
ENSG00000204495.3	PRAMEF13	coding	chr1:13447413-13452656	ENSG00000254619.1	RP11-646J21.4.1	lncRNA	chr11:33831690-33832724	ENSG00000207654.1	MIR128-1	miRNA	chr2:136422966-136423048
ENSG00000204495.3	PRAMEF13	coding	chr1:13447413-13452656	ENSG00000228105.1	RP3-340N1.6.1	lncRNA	chr1:20569587-20571148	ENSG00000207654.1	MIR128-1	miRNA	chr2:136422966-136423048
ENSG00000176134.4	AL445665.1	coding	chr9:69650262-69660358	ENSG00000248029.2	CTD-2313F11.3.1	lncRNA	chr5:54359006-54362058	ENSG00000207654.1	MIR128-1	miRNA	chr2:136422966-136423048
ENSG00000176134.4	AL445665.1	coding	chr9:69650262-69660358	ENSG00000241881.1	U66059.58.1	lncRNA	chr7:141985578-141988698	ENSG00000207654.1	MIR128-1	miRNA	chr2:136422966-136423048
ENSG00000176134.4	AL445665.1	coding	chr9:69650262-69660358	ENSG00000260041.1	RP11-355E10.1.1	lncRNA	chr16:56143448-56170912	ENSG00000207654.1	MIR128-1	miRNA	chr2:136422966-136423048
ENSG00000176134.4	AL445665.1	coding	chr9:69650262-69660358	ENSG00000248440.1	RP11-231G15.1.1	lncRNA	chr5:108833577-108834809	ENSG00000207654.1	MIR128-1	miRNA	chr2:136422966-136423048
ENSG00000184394.1	OR4N5	coding	chr14:20611894-20612821	ENSG00000228105.1	RP3-340N1.6.1	lncRNA	chr1:20569587-20571148	ENSG00000207654.1	MIR128-1	miRNA	chr2:136422966-136423048
ENSG00000184394.1	OR4N5	coding	chr14:20611894-20612821	ENSG00000248184.1	RP11-231C18.1.1	lncRNA	chr4:55199058-55222121	ENSG00000207654.1	MIR128-1	miRNA	chr2:136422966-136423048
ENSG00000260342.1	RP11-1035H13.3.1	coding	chr16:18799359-18812841	ENSG00000258393.1	RP11-907D1.2.1	lncRNA	chr14:97582691-97587838	ENSG00000207654.1	MIR128-1	miRNA	chr2:136422966-136423048
ENSG00000181761.5	OR8H3	coding	chr11:55889848-55890787	ENSG00000256149.1	RP11-357K6.3.1	lncRNA	chr12:119287158-119346735	ENSG00000207654.1	MIR128-1	miRNA	chr2:136422966-136423048
ENSG00000186306.1	OR10T2	coding	chr1:158368311-158369256	ENSG00000248184.1	RP11-231C18.1.1	lncRNA	chr4:55199058-55222121	ENSG00000207654.1	MIR128-1	miRNA	chr2:136422966-136423048
ENSG00000237247.2	MBD3L5	coding	chr19:7030588-7033053	ENSG00000237337.1	RP11-567C20.2.1	lncRNA	chr1:50639977-50641540	ENSG00000207654.1	MIR128-1	miRNA	chr2:136422966-136423048
ENSG00000182645.4	C10orf96	coding	chr10:118083939-118139541	ENSG00000205865.4	FAM99B	lncRNA	chr11:1704498-1706859	ENSG00000207654.1	MIR128-1	miRNA	chr2:136422966-136423048
ENSG00000205441.4	KRTAP10-7	coding	chr21:46020496-46022091	ENSG00000261629.1	RP5-842K16.2.1	lncRNA	chr7:141129510-141131068	ENSG00000207654.1	MIR128-1	miRNA	chr2:136422966-136423048
ENSG00000018236.9	CNTN1	coding	chr12:41086243-41465772	ENSG00000259055.1	RP11-1140I5.1.1	lncRNA	chr14:51555674-51558006	ENSG00000207739.1	MIR218-2	miRNA	chr5:168195150-168195260
ENSG00000112339.10	HBS1L	coding	chr6:135281515-135424194	ENSG00000253682.1	RP11-700E23.2.1	lncRNA	chr8:93415772-93425873	ENSG00000199089.2	MIR202	miRNA	chr10:135061014-135061124
ENSG00000112339.10	HBS1L	coding	chr6:135281515-135424194	ENSG00000261569.1	RP11-586K12.11.1	lncRNA	chr16:32660513-32675277	ENSG00000199089.2	MIR202	miRNA	chr10:135061014-135061124
ENSG00000112339.10	HBS1L	coding	chr6:135281515-135424194	ENSG00000254822.1	RP11-375D13.3.1	lncRNA	chr11:41898183-41898628	ENSG00000199089.2	MIR202	miRNA	chr10:135061014-135061124
ENSG00000102080.8	TEX28P2	coding	chrX:153424681-153445634	ENSG00000232597.1	AC013727.1.1	lncRNA	chr2:104473427-104496667	ENSG00000207626.1	MIR562	miRNA	chr2:233037362-233037457
ENSG00000102080.8	TEX28P2	coding	chrX:153424681-153445634	ENSG00000232597.1	AC013727.1.1	lncRNA	chr2:104473427-104496667	ENSG00000207562.1	MIR34C	miRNA	chr11:111384163-111384240
ENSG00000102080.8	TEX28P2	coding	chrX:153424681-153445634	ENSG00000232597.1	AC013727.1.1	lncRNA	chr2:104473427-104496667	ENSG00000212024.1	MIR550A3	miRNA	chr7:29720348-29720445
ENSG00000102080.8	TEX28P2	coding	chrX:153424681-153445634	ENSG00000236378.1	RP11-394G3.2.1	lncRNA	chr6:136128285-136129604	ENSG00000207632.1	MIR588	miRNA	chr6:126805776-126805859
ENSG00000102080.8	TEX28P2	coding	chrX:153424681-153445634	ENSG00000234394.1	RP11-561O23.5.1	lncRNA	chr9:70943399-70945547	ENSG00000207632.1	MIR588	miRNA	chr6:126805776-126805859
ENSG00000102080.8	TEX28P2	coding	chrX:153424681-153445634	ENSG00000237716.1	RP3-400B16.3.1	lncRNA	chr6:4186857-4188343	ENSG00000221493.1	MIR320C1	miRNA	chr18:19263470-19263558
ENSG00000102080.8	TEX28P2	coding	chrX:153424681-153445634	ENSG00000224702.1	RP11-38C18.2.1	lncRNA	chr1:165179863-165182327	ENSG00000207626.1	MIR562	miRNA	chr2:233037362-233037457
ENSG00000102080.8	TEX28P2	coding	chrX:153424681-153445634	ENSG00000223446.1	RP11-274J16.5.1	lncRNA	chr9:95857220-95857811	ENSG00000207626.1	MIR562	miRNA	chr2:233037362-233037457
ENSG00000102080.8	TEX28P2	coding	chrX:153424681-153445634	ENSG00000225775.1	RP11-354I10.1.1	lncRNA	chr6:9124453-9162010	ENSG00000207626.1	MIR562	miRNA	chr2:233037362-233037457
ENSG00000102080.8	TEX28P2	coding	chrX:153424681-153445634	ENSG00000227880.1	RP11-46E17.6.1	lncRNA	chr22:27853207-27856021	ENSG00000207626.1	MIR562	miRNA	chr2:233037362-233037457
ENSG00000102080.8	TEX28P2	coding	chrX:153424681-153445634	ENSG00000229118.1	AC068491.2.1	lncRNA	chr2:112022859-112037457	ENSG00000207626.1	MIR562	miRNA	chr2:233037362-233037457
ENSG00000102080.8	TEX28P2	coding	chrX:153424681-153445634	ENSG00000231487.1	AP006285.7.1	lncRNA	chr11:1683813-1684573	ENSG00000207626.1	MIR562	miRNA	chr2:233037362-233037457
ENSG00000102080.8	TEX28P2	coding	chrX:153424681-153445634	ENSG00000224702.1	RP11-38C18.2.1	lncRNA	chr1:165179863-165182327	ENSG00000207562.1	MIR34C	miRNA	chr11:111384163-111384240
ENSG00000102080.8	TEX28P2	coding	chrX:153424681-153445634	ENSG00000223446.1	RP11-274J16.5.1	lncRNA	chr9:95857220-95857811	ENSG00000207562.1	MIR34C	miRNA	chr11:111384163-111384240
ENSG00000102080.8	TEX28P2	coding	chrX:153424681-153445634	ENSG00000225775.1	RP11-354I10.1.1	lncRNA	chr6:9124453-9162010	ENSG00000207562.1	MIR34C	miRNA	chr11:111384163-111384240
ENSG00000102080.8	TEX28P2	coding	chrX:153424681-153445634	ENSG00000234394.1	RP11-561O23.5.1	lncRNA	chr9:70943399-70945547	ENSG00000207562.1	MIR34C	miRNA	chr11:111384163-111384240
ENSG00000102080.8	TEX28P2	coding	chrX:153424681-153445634	ENSG00000257750.1	RP11-295G12.1.1	lncRNA	chr12:74154468-74192507	ENSG00000207562.1	MIR34C	miRNA	chr11:111384163-111384240
ENSG00000102080.8	TEX28P2	coding	chrX:153424681-153445634	ENSG00000254762.1	RP11-867G23.2.1	lncRNA	chr11:66035105-66035600	ENSG00000221739.1	MIR1203	miRNA	chr17:46233788-46233873
ENSG00000102080.8	TEX28P2	coding	chrX:153424681-153445634	ENSG00000257750.1	RP11-295G12.1.1	lncRNA	chr12:74154468-74192507	ENSG00000212024.1	MIR550A3	miRNA	chr7:29720348-29720445
ENSG00000102080.8	TEX28P2	coding	chrX:153424681-153445634	ENSG00000231487.1	AP006285.7.1	lncRNA	chr11:1683813-1684573	ENSG00000212024.1	MIR550A3	miRNA	chr7:29720348-29720445
ENSG00000078487.12	ZCWPW1	coding	chr7:99998448-100026615	ENSG00000249941.1	CTD-2046I8.1.1	lncRNA	chr5:4866633-4874872	ENSG00000221737.1	MIR548I1	miRNA	chr3:125509246-125509395
ENSG00000187545.5	PRAMEF10	coding	chr1:12952726-12958101	ENSG00000224179.1	RP3-416J7.2.1	lncRNA	chr6:224949-226400	ENSG00000207775.1	MIR548A1	miRNA	chr6:18572014-18572111
ENSG00000157950.10	SSX2B	coding	chrX:52780317-52790617	ENSG00000224179.1	RP3-416J7.2.1	lncRNA	chr6:224949-226400	ENSG00000207577.1	MIR587	miRNA	chr6:107231999-107232095
ENSG00000214643.2	DEFB133	coding	chr6:49913813-49917157	ENSG00000224179.1	RP3-416J7.2.1	lncRNA	chr6:224949-226400	ENSG00000221296.1	MIR548T	miRNA	chr4:174189304-174189386
ENSG00000181273.2	OR5AK2	coding	chr11:56756346-56757342	ENSG00000224179.1	RP3-416J7.2.1	lncRNA	chr6:224949-226400	ENSG00000221296.1	MIR548T	miRNA	chr4:174189304-174189386
ENSG00000211783.3	TRAV9-1	coding	chr14:22279673-22280149	ENSG00000224179.1	RP3-416J7.2.1	lncRNA	chr6:224949-226400	ENSG00000221296.1	MIR548T	miRNA	chr4:174189304-174189386
ENSG00000214643.2	DEFB133	coding	chr6:49913813-49917157	ENSG00000224179.1	RP3-416J7.2.1	lncRNA	chr6:224949-226400	ENSG00000207693.1	MIR602	miRNA	chr9:140732870-140732968
ENSG00000094661.2	OR1I1	coding	chr19:15197790-15199032	ENSG00000224179.1	RP3-416J7.2.1	lncRNA	chr6:224949-226400	ENSG00000207691.1	MIR183	miRNA	chr7:129414744-129414854
ENSG00000185177.8	ZNF479	coding	chr7:57187320-57207571	ENSG00000224179.1	RP3-416J7.2.1	lncRNA	chr6:224949-226400	ENSG00000207691.1	MIR183	miRNA	chr7:129414744-129414854
ENSG00000185177.8	ZNF479	coding	chr7:57187320-57207571	ENSG00000224179.1	RP3-416J7.2.1	lncRNA	chr6:224949-226400	ENSG00000207815.1	MIR563	miRNA	chr3:15915277-15915356
ENSG00000028310.12	BRD9	coding	chr5:850405-892939	ENSG00000249941.1	CTD-2046I8.1.1	lncRNA	chr5:4866633-4874872	ENSG00000221737.1	MIR548I1	miRNA	chr3:125509246-125509395
ENSG00000028310.12	BRD9	coding	chr5:850405-892939	ENSG00000257522.1	RP11-562L8.1.1	lncRNA	chr14:29734030-29850501	ENSG00000221737.1	MIR548I1	miRNA	chr3:125509246-125509395
ENSG00000042088.9	TDP1	coding	chr14:90421282-90511106	ENSG00000249941.1	CTD-2046I8.1.1	lncRNA	chr5:4866633-4874872	ENSG00000221737.1	MIR548I1	miRNA	chr3:125509246-125509395
ENSG00000197263.2	OR8D2	coding	chr11:124189133-124190184	ENSG00000257284.1	RP11-190J23.1.1	lncRNA	chr2:143919646-143929741	ENSG00000207596.1	MIR194-2	miRNA	chr11:64658826-64658911
ENSG00000176695.3	OR4F17	coding	chr19:107465-111596	ENSG00000257284.1	RP11-190J23.1.1	lncRNA	chr2:143919646-143929741	ENSG00000221067.1	MIR1280	miRNA	chr3:128081007-128081101
ENSG00000176695.3	OR4F17	coding	chr19:107465-111596	ENSG00000257284.1	RP11-190J23.1.1	lncRNA	chr2:143919646-143929741	ENSG00000207627.1	MIR581	miRNA	chr5:53247333-53247429
ENSG00000187766.1	KRTAP10-8	coding	chr21:46031995-46032871	ENSG00000257284.1	RP11-190J23.1.1	lncRNA	chr2:143919646-143929741	ENSG00000221067.1	MIR1280	miRNA	chr3:128081007-128081101
ENSG00000259625.1	AC073416.2	coding	chr2:90249113-90249401	ENSG00000257284.1	RP11-190J23.1.1	lncRNA	chr2:143919646-143929741	ENSG00000207990.1	MIR182	miRNA	chr7:129410222-129410332
ENSG00000130538.4	OR11H1	coding	chr22:16448823-16449805	ENSG00000257725.1	RP11-654D12.3.1	lncRNA	chr12:90341469-90343503	ENSG00000207775.1	MIR548A1	miRNA	chr6:18572014-18572111
ENSG00000131002.6	CYorf15B.1	coding	chrY:21752638-21768160	ENSG00000257725.1	RP11-654D12.3.1	lncRNA	chr12:90341469-90343503	ENSG00000207656.1	MIR489	miRNA	chr7:93113247-93113331
ENSG00000131002.6	CYorf15B.1	coding	chrY:21752638-21768160	ENSG00000257725.1	RP11-654D12.3.1	lncRNA	chr12:90341469-90343503	ENSG00000207775.1	MIR548A1	miRNA	chr6:18572014-18572111
ENSG00000131002.6	CYorf15B.1	coding	chrY:21752638-21768160	ENSG00000257725.1	RP11-654D12.3.1	lncRNA	chr12:90341469-90343503	ENSG00000207732.1	MIR218-1	miRNA	chr4:20529897-20530007
ENSG00000183632.10	TP53TG3	coding	chr16:32684851-32688053	ENSG00000257725.1	RP11-654D12.3.1	lncRNA	chr12:90341469-90343503	ENSG00000199150.1	MIRLET7G	miRNA	chr3:52302291-52302379
ENSG00000183632.10	TP53TG3	coding	chr16:32684851-32688053	ENSG00000257725.1	RP11-654D12.3.1	lncRNA	chr12:90341469-90343503	ENSG00000207613.1	MIR181C	miRNA	chr19:13985512-13985622
ENSG00000261421.1	RP11-22D3.1.1	coding	chr16:49193418-49195934	ENSG00000257725.1	RP11-654D12.3.1	lncRNA	chr12:90341469-90343503	ENSG00000207589.1	MIR508	miRNA	chrX:146318430-146318545
ENSG00000261421.1	RP11-22D3.1.1	coding	chr16:49193418-49195934	ENSG00000257725.1	RP11-654D12.3.1	lncRNA	chr12:90341469-90343503	ENSG00000207732.1	MIR218-1	miRNA	chr4:20529897-20530007
ENSG00000099721.9	AMELY	coding	chrY:6733958-6742068	ENSG00000257725.1	RP11-654D12.3.1	lncRNA	chr12:90341469-90343503	ENSG00000207656.1	MIR489	miRNA	chr7:93113247-93113331
ENSG00000258708.1	RP11-537P22.1.1	coding	chr14:37641092-37643016	ENSG00000257725.1	RP11-654D12.3.1	lncRNA	chr12:90341469-90343503	ENSG00000207589.1	MIR508	miRNA	chrX:146318430-146318545
ENSG00000099721.9	AMELY	coding	chrY:6733958-6742068	ENSG00000257725.1	RP11-654D12.3.1	lncRNA	chr12:90341469-90343503	ENSG00000207613.1	MIR181C	miRNA	chr19:13985512-13985622
ENSG00000130538.4	OR11H1	coding	chr22:16448823-16449805	ENSG00000231774.1	RP11-402P6.11.1	lncRNA	chrX:70980624-70981509	ENSG00000199082.1	MIR342	miRNA	chr14:100575991-100576090
ENSG00000130538.4	OR11H1	coding	chr22:16448823-16449805	ENSG00000231774.1	RP11-402P6.11.1	lncRNA	chrX:70980624-70981509	ENSG00000208017.1	MIR140	miRNA	chr16:69966983-69967083
ENSG00000130538.4	OR11H1	coding	chr22:16448823-16449805	ENSG00000176728.3	TTTY14	lncRNA	chrY:21034386-21239302	ENSG00000207775.1	MIR548A1	miRNA	chr6:18572014-18572111
ENSG00000130538.4	OR11H1	coding	chr22:16448823-16449805	ENSG00000176728.3	TTTY14	lncRNA	chrY:21034386-21239302	ENSG00000207838.1	MIR517C	miRNA	chr19:54244566-54244661
ENSG00000130538.4	OR11H1	coding	chr22:16448823-16449805	ENSG00000261790.1	AC005606.14.1	lncRNA	chr16:2034877-2040358	ENSG00000207990.1	MIR182	miRNA	chr7:129410222-129410332
ENSG00000130538.4	OR11H1	coding	chr22:16448823-16449805	ENSG00000261790.1	AC005606.14.1	lncRNA	chr16:2034877-2040358	ENSG00000207991.1	MIR601	miRNA	chr9:126164803-126164882
ENSG00000130538.4	OR11H1	coding	chr22:16448823-16449805	ENSG00000238277.1	AC068483.1.1	lncRNA	chr2:129821418-129829298	ENSG00000207974.1	MIR557	miRNA	chr1:168344761-168344859
ENSG00000130538.4	OR11H1	coding	chr22:16448823-16449805	ENSG00000249326.1	CTD-2194D22.4.1	lncRNA	chr5:1887445-1900607	ENSG00000207974.1	MIR557	miRNA	chr1:168344761-168344859
ENSG00000130538.4	OR11H1	coding	chr22:16448823-16449805	ENSG00000231204.1	AC011752.1.1	lncRNA	chr2:21540531-21784185	ENSG00000207974.1	MIR557	miRNA	chr1:168344761-168344859
ENSG00000130538.4	OR11H1	coding	chr22:16448823-16449805	ENSG00000230363.1	RP4-737A23.3.1	lncRNA	chr1:58343973-58346412	ENSG00000211991.1	MIR676	miRNA	chrX:69242699-69242783
ENSG00000130538.4	OR11H1	coding	chr22:16448823-16449805	ENSG00000238277.1	AC068483.1.1	lncRNA	chr2:129821418-129829298	ENSG00000211991.1	MIR676	miRNA	chrX:69242699-69242783
ENSG00000130538.4	OR11H1	coding	chr22:16448823-16449805	ENSG00000231204.1	AC011752.1.1	lncRNA	chr2:21540531-21784185	ENSG00000211991.1	MIR676	miRNA	chrX:69242699-69242783
ENSG00000130538.4	OR11H1	coding	chr22:16448823-16449805	ENSG00000255845.1	RP11-804A23.1.1	lncRNA	chr11:60581404-60589212	ENSG00000211991.1	MIR676	miRNA	chrX:69242699-69242783
ENSG00000130538.4	OR11H1	coding	chr22:16448823-16449805	ENSG00000236914.3	RP11-1008C21.2.1	lncRNA	chr15:38361681-38365160	ENSG00000199082.1	MIR342	miRNA	chr14:100575991-100576090
ENSG00000130538.4	OR11H1	coding	chr22:16448823-16449805	ENSG00000236914.3	RP11-1008C21.2.1	lncRNA	chr15:38361681-38365160	ENSG00000207990.1	MIR182	miRNA	chr7:129410222-129410332
ENSG00000130538.4	OR11H1	coding	chr22:16448823-16449805	ENSG00000236914.3	RP11-1008C21.2.1	lncRNA	chr15:38361681-38365160	ENSG00000207952.1	MIR624	miRNA	chr14:31483851-31483948
ENSG00000130538.4	OR11H1	coding	chr22:16448823-16449805	ENSG00000236914.3	RP11-1008C21.2.1	lncRNA	chr15:38361681-38365160	ENSG00000208017.1	MIR140	miRNA	chr16:69966983-69967083
ENSG00000130538.4	OR11H1	coding	chr22:16448823-16449805	ENSG00000224918.1	AY269186.2.1	lncRNA	chr3:95030-96029	ENSG00000221522.1	MIR548AC	miRNA	chr4:104343256-104343353
ENSG00000130538.4	OR11H1	coding	chr22:16448823-16449805	ENSG00000233074.1	RP11-327I22.6.1	lncRNA	chr9:43140536-43142739	ENSG00000221522.1	MIR548AC	miRNA	chr4:104343256-104343353
ENSG00000130538.4	OR11H1	coding	chr22:16448823-16449805	ENSG00000250583.1	CTD-2233C11.2.1	lncRNA	chr5:33519720-33522335	ENSG00000221522.1	MIR548AC	miRNA	chr4:104343256-104343353
ENSG00000130538.4	OR11H1	coding	chr22:16448823-16449805	ENSG00000241754.1	RP11-280H21.1.1	lncRNA	chr3:102382006-102392757	ENSG00000221522.1	MIR548AC	miRNA	chr4:104343256-104343353
ENSG00000130538.4	OR11H1	coding	chr22:16448823-16449805	ENSG00000255041.1	RP11-430H10.4.1	lncRNA	chr11:45408765-45535352	ENSG00000221522.1	MIR548AC	miRNA	chr4:104343256-104343353
ENSG00000130538.4	OR11H1	coding	chr22:16448823-16449805	ENSG00000234238.1	RP11-430L16.1.1	lncRNA	chr3:187824883-187864808	ENSG00000221522.1	MIR548AC	miRNA	chr4:104343256-104343353
ENSG00000130538.4	OR11H1	coding	chr22:16448823-16449805	ENSG00000170590.4	LINC00266-3	lncRNA	chr6:131909-144885	ENSG00000207775.1	MIR548A1	miRNA	chr6:18572014-18572111
ENSG00000130538.4	OR11H1	coding	chr22:16448823-16449805	ENSG00000232211.1	RP11-395D3.1.1	lncRNA	chr9:89247061-89311411	ENSG00000207775.1	MIR548A1	miRNA	chr6:18572014-18572111
ENSG00000130538.4	OR11H1	coding	chr22:16448823-16449805	ENSG00000227223.1	RP11-23O13.1.1	lncRNA	chr20:20702316-20703034	ENSG00000199082.1	MIR342	miRNA	chr14:100575991-100576090
ENSG00000130538.4	OR11H1	coding	chr22:16448823-16449805	ENSG00000257523.1	CTD-2384A14.2.1	lncRNA	chr14:29445041-29448130	ENSG00000208017.1	MIR140	miRNA	chr16:69966983-69967083
ENSG00000130538.4	OR11H1	coding	chr22:16448823-16449805	ENSG00000236436.1	AC012361.1.1	lncRNA	chr2:21059530-21061421	ENSG00000207577.1	MIR587	miRNA	chr6:107231999-107232095
ENSG00000130538.4	OR11H1	coding	chr22:16448823-16449805	ENSG00000224918.1	AY269186.2.1	lncRNA	chr3:95030-96029	ENSG00000199082.1	MIR342	miRNA	chr14:100575991-100576090
ENSG00000130538.4	OR11H1	coding	chr22:16448823-16449805	ENSG00000229882.1	RP13-30A9.2.1	lncRNA	chr20:61265123-61267214	ENSG00000208017.1	MIR140	miRNA	chr16:69966983-69967083
ENSG00000130538.4	OR11H1	coding	chr22:16448823-16449805	ENSG00000227090.1	AP000402.3.1	lncRNA	chr21:26258989-26275070	ENSG00000199082.1	MIR342	miRNA	chr14:100575991-100576090
ENSG00000130538.4	OR11H1	coding	chr22:16448823-16449805	ENSG00000227090.1	AP000402.3.1	lncRNA	chr21:26258989-26275070	ENSG00000208017.1	MIR140	miRNA	chr16:69966983-69967083
ENSG00000130538.4	OR11H1	coding	chr22:16448823-16449805	ENSG00000230363.1	RP4-737A23.3.1	lncRNA	chr1:58343973-58346412	ENSG00000199082.1	MIR342	miRNA	chr14:100575991-100576090
ENSG00000130538.4	OR11H1	coding	chr22:16448823-16449805	ENSG00000230363.1	RP4-737A23.3.1	lncRNA	chr1:58343973-58346412	ENSG00000207957.1	MIR105-1	miRNA	chrX:151560690-151560771
ENSG00000130538.4	OR11H1	coding	chr22:16448823-16449805	ENSG00000228795.1	RP11-436F21.3.1	lncRNA	chr9:106006007-106015452	ENSG00000199082.1	MIR342	miRNA	chr14:100575991-100576090
ENSG00000130538.4	OR11H1	coding	chr22:16448823-16449805	ENSG00000228795.1	RP11-436F21.3.1	lncRNA	chr9:106006007-106015452	ENSG00000208017.1	MIR140	miRNA	chr16:69966983-69967083
ENSG00000130538.4	OR11H1	coding	chr22:16448823-16449805	ENSG00000229379.1	AC006041.1.1	lncRNA	chr7:15880921-15881985	ENSG00000199082.1	MIR342	miRNA	chr14:100575991-100576090
ENSG00000130538.4	OR11H1	coding	chr22:16448823-16449805	ENSG00000229379.1	AC006041.1.1	lncRNA	chr7:15880921-15881985	ENSG00000208017.1	MIR140	miRNA	chr16:69966983-69967083
ENSG00000130538.4	OR11H1	coding	chr22:16448823-16449805	ENSG00000253403.1	RP11-348M17.2.1	lncRNA	chr5:161114352-161116414	ENSG00000199082.1	MIR342	miRNA	chr14:100575991-100576090
ENSG00000130538.4	OR11H1	coding	chr22:16448823-16449805	ENSG00000253403.1	RP11-348M17.2.1	lncRNA	chr5:161114352-161116414	ENSG00000207957.1	MIR105-1	miRNA	chrX:151560690-151560771
ENSG00000130538.4	OR11H1	coding	chr22:16448823-16449805	ENSG00000253403.1	RP11-348M17.2.1	lncRNA	chr5:161114352-161116414	ENSG00000208017.1	MIR140	miRNA	chr16:69966983-69967083
ENSG00000130538.4	OR11H1	coding	chr22:16448823-16449805	ENSG00000238277.1	AC068483.1.1	lncRNA	chr2:129821418-129829298	ENSG00000207723.1	MIR519A2	miRNA	chr19:54265597-54265684
ENSG00000130538.4	OR11H1	coding	chr22:16448823-16449805	ENSG00000238277.1	AC068483.1.1	lncRNA	chr2:129821418-129829298	ENSG00000207957.1	MIR105-1	miRNA	chrX:151560690-151560771
ENSG00000130538.4	OR11H1	coding	chr22:16448823-16449805	ENSG00000254734.1	CTD-3138F19.1.1	lncRNA	chr11:29735455-29903261	ENSG00000208017.1	MIR140	miRNA	chr16:69966983-69967083
ENSG00000130538.4	OR11H1	coding	chr22:16448823-16449805	ENSG00000235020.1	RP11-109I13.2.1	lncRNA	chr10:18523096-18550123	ENSG00000207990.1	MIR182	miRNA	chr7:129410222-129410332
ENSG00000130538.4	OR11H1	coding	chr22:16448823-16449805	ENSG00000225759.1	LINC00489	lncRNA	chr20:36247699-36251521	ENSG00000211578.1	MIR766	miRNA	chrX:118780700-118780811
ENSG00000130538.4	OR11H1	coding	chr22:16448823-16449805	ENSG00000238194.1	RP4-719C8.1.1	lncRNA	chr20:58201518-58203344	ENSG00000211578.1	MIR766	miRNA	chrX:118780700-118780811
ENSG00000130538.4	OR11H1	coding	chr22:16448823-16449805	ENSG00000223393.1	RP5-858B6.3.1	lncRNA	chr1:231010591-231014761	ENSG00000199082.1	MIR342	miRNA	chr14:100575991-100576090
ENSG00000130538.4	OR11H1	coding	chr22:16448823-16449805	ENSG00000228338.1	RP5-845O24.8.1	lncRNA	chr1:12882548-12883022	ENSG00000199082.1	MIR342	miRNA	chr14:100575991-100576090
ENSG00000130538.4	OR11H1	coding	chr22:16448823-16449805	ENSG00000236720.1	RP11-63B19.1.1	lncRNA	chr1:177669658-177679465	ENSG00000207991.1	MIR601	miRNA	chr9:126164803-126164882
ENSG00000130538.4	OR11H1	coding	chr22:16448823-16449805	ENSG00000233082.1	AC073094.4.1	lncRNA	chr7:1306988-1308903	ENSG00000207952.1	MIR624	miRNA	chr14:31483851-31483948
ENSG00000130538.4	OR11H1	coding	chr22:16448823-16449805	ENSG00000234686.1	AC010971.1.1	lncRNA	chr7:49269732-49294412	ENSG00000207990.1	MIR182	miRNA	chr7:129410222-129410332
ENSG00000130538.4	OR11H1	coding	chr22:16448823-16449805	ENSG00000248137.1	RP11-468D11.1.1	lncRNA	chr5:2831134-2835253	ENSG00000207990.1	MIR182	miRNA	chr7:129410222-129410332
ENSG00000130538.4	OR11H1	coding	chr22:16448823-16449805	ENSG00000235050.1	MLIP-AS1	lncRNA	chr6:53911716-53912392	ENSG00000207990.1	MIR182	miRNA	chr7:129410222-129410332
ENSG00000130538.4	OR11H1	coding	chr22:16448823-16449805	ENSG00000258979.1	RP11-433J8.2.1	lncRNA	chr14:97207527-97256950	ENSG00000207990.1	MIR182	miRNA	chr7:129410222-129410332
ENSG00000130538.4	OR11H1	coding	chr22:16448823-16449805	ENSG00000230159.1	RP11-232D9.3.1	lncRNA	chrX:115826877-115828156	ENSG00000207577.1	MIR587	miRNA	chr6:107231999-107232095
ENSG00000130538.4	OR11H1	coding	chr22:16448823-16449805	ENSG00000233519.1	RP11-177F11.1.1	lncRNA	chr1:240563970-240564423	ENSG00000207577.1	MIR587	miRNA	chr6:107231999-107232095
ENSG00000130538.4	OR11H1	coding	chr22:16448823-16449805	ENSG00000229599.1	LINC00411	lncRNA	chr13:101593115-101596618	ENSG00000207577.1	MIR587	miRNA	chr6:107231999-107232095
ENSG00000130538.4	OR11H1	coding	chr22:16448823-16449805	ENSG00000228826.1	AL592494.4.1	lncRNA	chr1:121236176-121252295	ENSG00000207577.1	MIR587	miRNA	chr6:107231999-107232095
ENSG00000130538.4	OR11H1	coding	chr22:16448823-16449805	ENSG00000215231.3	CTD-2247C11.3.1	lncRNA	chr5:5034471-5070117	ENSG00000207577.1	MIR587	miRNA	chr6:107231999-107232095
ENSG00000130538.4	OR11H1	coding	chr22:16448823-16449805	ENSG00000255945.1	RP11-351O2.1.1	lncRNA	chr12:128082712-128084260	ENSG00000207957.1	MIR105-1	miRNA	chrX:151560690-151560771
ENSG00000130538.4	OR11H1	coding	chr22:16448823-16449805	ENSG00000233290.1	RP11-147G16.1.1	lncRNA	chr1:82680903-82726817	ENSG00000207991.1	MIR601	miRNA	chr9:126164803-126164882
ENSG00000130538.4	OR11H1	coding	chr22:16448823-16449805	ENSG00000170590.4	LINC00266-3	lncRNA	chr6:131909-144885	ENSG00000207838.1	MIR517C	miRNA	chr19:54244566-54244661
ENSG00000130538.4	OR11H1	coding	chr22:16448823-16449805	ENSG00000258979.1	RP11-433J8.2.1	lncRNA	chr14:97207527-97256950	ENSG00000207952.1	MIR624	miRNA	chr14:31483851-31483948
ENSG00000130538.4	OR11H1	coding	chr22:16448823-16449805	ENSG00000228826.1	AL592494.4.1	lncRNA	chr1:121236176-121252295	ENSG00000207952.1	MIR624	miRNA	chr14:31483851-31483948
ENSG00000130538.4	OR11H1	coding	chr22:16448823-16449805	ENSG00000225112.1	RP11-295P9.6.1	lncRNA	chr10:13752414-13754054	ENSG00000208017.1	MIR140	miRNA	chr16:69966983-69967083
ENSG00000130538.4	OR11H1	coding	chr22:16448823-16449805	ENSG00000223438.1	RP1-171K16.5.1	lncRNA	chrX:140713993-140714863	ENSG00000208017.1	MIR140	miRNA	chr16:69966983-69967083
ENSG00000130538.4	OR11H1	coding	chr22:16448823-16449805	ENSG00000259237.1	RP11-209E8.1.1	lncRNA	chr15:53408561-53421895	ENSG00000208017.1	MIR140	miRNA	chr16:69966983-69967083
ENSG00000205883.2	DEFB135	coding	chr8:11839829-11842099	ENSG00000223404.1	RP11-471M2.2.1	lncRNA	chr13:88453290-88456063	ENSG00000199150.1	MIRLET7G	miRNA	chr3:52302291-52302379
ENSG00000069509.5	FUNDC1	coding	chrX:44382884-44402247	ENSG00000249332.1	RP1-251I12.1.1	lncRNA	chr5:15112485-15117116	ENSG00000207869.1	MIR498	miRNA	chr19:54177450-54177574
ENSG00000183938.5	TRBV21OR9-2	coding	chr9:33629118-33629584	ENSG00000234052.1	AP001607.1.1	lncRNA	chr21:29011011-29025810	ENSG00000207587.1	MIR544A	miRNA	chr14:101514994-101515085
ENSG00000211879.1	TRAJ10	coding	chr14:23002444-23002508	ENSG00000234052.1	AP001607.1.1	lncRNA	chr21:29011011-29025810	ENSG00000207587.1	MIR544A	miRNA	chr14:101514994-101515085
ENSG00000211879.1	TRAJ10	coding	chr14:23002444-23002508	ENSG00000234052.1	AP001607.1.1	lncRNA	chr21:29011011-29025810	ENSG00000207577.1	MIR587	miRNA	chr6:107231999-107232095
ENSG00000103671.5	TRIP4	coding	chr15:64679946-64747502	ENSG00000234052.1	AP001607.1.1	lncRNA	chr21:29011011-29025810	ENSG00000207587.1	MIR544A	miRNA	chr14:101514994-101515085
ENSG00000203812.2	HIST2H2AA4	coding	chr1:149822642-149823191	ENSG00000234052.1	AP001607.1.1	lncRNA	chr21:29011011-29025810	ENSG00000207587.1	MIR544A	miRNA	chr14:101514994-101515085
ENSG00000186113.1	OR5D14	coding	chr11:55563031-55563976	ENSG00000234052.1	AP001607.1.1	lncRNA	chr21:29011011-29025810	ENSG00000207587.1	MIR544A	miRNA	chr14:101514994-101515085
ENSG00000232263.1	KRTAP25-1	coding	chr21:31661462-31661832	ENSG00000234052.1	AP001607.1.1	lncRNA	chr21:29011011-29025810	ENSG00000221033.1	MIR1272	miRNA	chr15:65054585-65054714
ENSG00000221840.2	OR4A5	coding	chr11:51411377-51412448	ENSG00000234052.1	AP001607.1.1	lncRNA	chr21:29011011-29025810	ENSG00000221288.1	MIR663B	miRNA	chr2:133014538-133014653
ENSG00000052344.10	PRSS8	coding	chr16:31142755-31147083	ENSG00000256469.1	RP11-856F16.2.1	lncRNA	chr11:94607216-94658686	ENSG00000199102.1	MIR302C	miRNA	chr4:113569518-113569586
ENSG00000052344.10	PRSS8	coding	chr16:31142755-31147083	ENSG00000229306.1	AP001464.4.1	lncRNA	chr21:14371996-14389013	ENSG00000199102.1	MIR302C	miRNA	chr4:113569518-113569586
ENSG00000052344.10	PRSS8	coding	chr16:31142755-31147083	ENSG00000254468.1	RP11-304M2.6.1	lncRNA	chr11:121278-125784	ENSG00000199102.1	MIR302C	miRNA	chr4:113569518-113569586
ENSG00000178243.2	C9orf62	coding	chr9:138235094-138238408	ENSG00000250806.2	CTC-293G12.1.1	lncRNA	chr5:99989815-99993674	ENSG00000253030.1	MIR2116	miRNA	chr15:59463381-59463461
ENSG00000211879.1	TRAJ10	coding	chr14:23002444-23002508	ENSG00000250806.2	CTC-293G12.1.1	lncRNA	chr5:99989815-99993674	ENSG00000207633.1	MIR505	miRNA	chrX:139006306-139006390
ENSG00000211879.1	TRAJ10	coding	chr14:23002444-23002508	ENSG00000250806.2	CTC-293G12.1.1	lncRNA	chr5:99989815-99993674	ENSG00000207797.1	MIR187	miRNA	chr18:33484780-33484889
ENSG00000211879.1	TRAJ10	coding	chr14:23002444-23002508	ENSG00000250806.2	CTC-293G12.1.1	lncRNA	chr5:99989815-99993674	ENSG00000253030.1	MIR2116	miRNA	chr15:59463381-59463461
ENSG00000211879.1	TRAJ10	coding	chr14:23002444-23002508	ENSG00000250806.2	CTC-293G12.1.1	lncRNA	chr5:99989815-99993674	ENSG00000207992.1	MIR519A1	miRNA	chr19:54255650-54255735
ENSG00000211879.1	TRAJ10	coding	chr14:23002444-23002508	ENSG00000250806.2	CTC-293G12.1.1	lncRNA	chr5:99989815-99993674	ENSG00000207810.1	MIR519E	miRNA	chr19:54183193-54183277
ENSG00000211879.1	TRAJ10	coding	chr14:23002444-23002508	ENSG00000250806.2	CTC-293G12.1.1	lncRNA	chr5:99989815-99993674	ENSG00000207609.1	MIR491	miRNA	chr9:20716103-20716187
ENSG00000211879.1	TRAJ10	coding	chr14:23002444-23002508	ENSG00000250806.2	CTC-293G12.1.1	lncRNA	chr5:99989815-99993674	ENSG00000207806.1	MIR522	miRNA	chr19:54254464-54254551
ENSG00000211879.1	TRAJ10	coding	chr14:23002444-23002508	ENSG00000250806.2	CTC-293G12.1.1	lncRNA	chr5:99989815-99993674	ENSG00000207977.1	MIR524	miRNA	chr19:54214255-54214342
ENSG00000211879.1	TRAJ10	coding	chr14:23002444-23002508	ENSG00000250806.2	CTC-293G12.1.1	lncRNA	chr5:99989815-99993674	ENSG00000207839.1	MIR33B	miRNA	chr17:17717149-17717245
ENSG00000211879.1	TRAJ10	coding	chr14:23002444-23002508	ENSG00000250806.2	CTC-293G12.1.1	lncRNA	chr5:99989815-99993674	ENSG00000207838.1	MIR517C	miRNA	chr19:54244566-54244661
ENSG00000255378.1	AC084121.16.1	coding	chr8:7636112-7638935	ENSG00000250806.2	CTC-293G12.1.1	lncRNA	chr5:99989815-99993674	ENSG00000207633.1	MIR505	miRNA	chrX:139006306-139006390
ENSG00000181785.1	OR5AS1	coding	chr11:55797894-55798869	ENSG00000250806.2	CTC-293G12.1.1	lncRNA	chr5:99989815-99993674	ENSG00000207633.1	MIR505	miRNA	chrX:139006306-139006390
ENSG00000185177.8	ZNF479	coding	chr7:57187320-57207571	ENSG00000250806.2	CTC-293G12.1.1	lncRNA	chr5:99989815-99993674	ENSG00000207633.1	MIR505	miRNA	chrX:139006306-139006390
ENSG00000255378.1	AC084121.16.1	coding	chr8:7636112-7638935	ENSG00000250806.2	CTC-293G12.1.1	lncRNA	chr5:99989815-99993674	ENSG00000207797.1	MIR187	miRNA	chr18:33484780-33484889
ENSG00000186924.2	KRTAP22-1	coding	chr21:31973413-31973612	ENSG00000250806.2	CTC-293G12.1.1	lncRNA	chr5:99989815-99993674	ENSG00000207797.1	MIR187	miRNA	chr18:33484780-33484889
ENSG00000255378.1	AC084121.16.1	coding	chr8:7636112-7638935	ENSG00000250806.2	CTC-293G12.1.1	lncRNA	chr5:99989815-99993674	ENSG00000253030.1	MIR2116	miRNA	chr15:59463381-59463461
ENSG00000185926.1	OR4C46	coding	chr11:51515281-51516211	ENSG00000250806.2	CTC-293G12.1.1	lncRNA	chr5:99989815-99993674	ENSG00000253030.1	MIR2116	miRNA	chr15:59463381-59463461
ENSG00000244057.2	LCE3C	coding	chr1:152573137-152573562	ENSG00000250806.2	CTC-293G12.1.1	lncRNA	chr5:99989815-99993674	ENSG00000253030.1	MIR2116	miRNA	chr15:59463381-59463461
ENSG00000219492.4	RP11-1396O13.13.1	coding	chr4:9385742-9390709	ENSG00000250806.2	CTC-293G12.1.1	lncRNA	chr5:99989815-99993674	ENSG00000207992.1	MIR519A1	miRNA	chr19:54255650-54255735
ENSG00000255378.1	AC084121.16.1	coding	chr8:7636112-7638935	ENSG00000250806.2	CTC-293G12.1.1	lncRNA	chr5:99989815-99993674	ENSG00000207992.1	MIR519A1	miRNA	chr19:54255650-54255735
ENSG00000187238.5	LCE3B	coding	chr1:152586286-152586574	ENSG00000250806.2	CTC-293G12.1.1	lncRNA	chr5:99989815-99993674	ENSG00000207609.1	MIR491	miRNA	chr9:20716103-20716187
ENSG00000255378.1	AC084121.16.1	coding	chr8:7636112-7638935	ENSG00000250806.2	CTC-293G12.1.1	lncRNA	chr5:99989815-99993674	ENSG00000207609.1	MIR491	miRNA	chr9:20716103-20716187
ENSG00000255378.1	AC084121.16.1	coding	chr8:7636112-7638935	ENSG00000250806.2	CTC-293G12.1.1	lncRNA	chr5:99989815-99993674	ENSG00000207838.1	MIR517C	miRNA	chr19:54244566-54244661
ENSG00000176904.1	OR51H1P	coding	chr11:4880885-4881794	ENSG00000250806.2	CTC-293G12.1.1	lncRNA	chr5:99989815-99993674	ENSG00000207553.1	MIR518C	miRNA	chr19:54211988-54212089
ENSG00000181785.1	OR5AS1	coding	chr11:55797894-55798869	ENSG00000250806.2	CTC-293G12.1.1	lncRNA	chr5:99989815-99993674	ENSG00000207810.1	MIR519E	miRNA	chr19:54183193-54183277
ENSG00000181785.1	OR5AS1	coding	chr11:55797894-55798869	ENSG00000250806.2	CTC-293G12.1.1	lncRNA	chr5:99989815-99993674	ENSG00000207609.1	MIR491	miRNA	chr9:20716103-20716187
ENSG00000185177.8	ZNF479	coding	chr7:57187320-57207571	ENSG00000250806.2	CTC-293G12.1.1	lncRNA	chr5:99989815-99993674	ENSG00000215938.1	MIR190B	miRNA	chr1:154166140-154166219
ENSG00000148690.9	FRA10AC1	coding	chr10:95427639-95462329	ENSG00000224267.1	RP11-149F8.5.1	lncRNA	chr9:68324610-68340644	ENSG00000221230.1	MIR548L	miRNA	chr11:94199660-94199746
ENSG00000148690.9	FRA10AC1	coding	chr10:95427639-95462329	ENSG00000224517.1	HTR2A-AS1	lncRNA	chr13:47426277-47430434	ENSG00000221230.1	MIR548L	miRNA	chr11:94199660-94199746
ENSG00000148690.9	FRA10AC1	coding	chr10:95427639-95462329	ENSG00000224517.1	HTR2A-AS1	lncRNA	chr13:47426277-47430434	ENSG00000211582.1	MIR758	miRNA	chr14:101492356-101492444
ENSG00000148690.9	FRA10AC1	coding	chr10:95427639-95462329	ENSG00000237527.1	AF241725.6.1	lncRNA	chr21:23027358-23058649	ENSG00000221230.1	MIR548L	miRNA	chr11:94199660-94199746
ENSG00000148690.9	FRA10AC1	coding	chr10:95427639-95462329	ENSG00000248137.1	RP11-468D11.1.1	lncRNA	chr5:2831134-2835253	ENSG00000221230.1	MIR548L	miRNA	chr11:94199660-94199746
ENSG00000148690.9	FRA10AC1	coding	chr10:95427639-95462329	ENSG00000237527.1	AF241725.6.1	lncRNA	chr21:23027358-23058649	ENSG00000211582.1	MIR758	miRNA	chr14:101492356-101492444
ENSG00000148690.9	FRA10AC1	coding	chr10:95427639-95462329	ENSG00000248137.1	RP11-468D11.1.1	lncRNA	chr5:2831134-2835253	ENSG00000211582.1	MIR758	miRNA	chr14:101492356-101492444
ENSG00000182824.6	AC008132.1	coding	chr22:18721426-18745407	ENSG00000259055.1	RP11-1140I5.1.1	lncRNA	chr14:51555674-51558006	ENSG00000207581.1	MIR199B	miRNA	chr9:131006999-131007109
ENSG00000182824.6	AC008132.1	coding	chr22:18721426-18745407	ENSG00000258383.1	CTD-2200A16.1.1	lncRNA	chr14:99791135-99798352	ENSG00000207581.1	MIR199B	miRNA	chr9:131006999-131007109
ENSG00000182824.6	AC008132.1	coding	chr22:18721426-18745407	ENSG00000229118.1	AC068491.2.1	lncRNA	chr2:112022859-112037457	ENSG00000207581.1	MIR199B	miRNA	chr9:131006999-131007109
ENSG00000182824.6	AC008132.1	coding	chr22:18721426-18745407	ENSG00000223536.1	AC008069.1.1	lncRNA	chr2:16909390-16948822	ENSG00000207581.1	MIR199B	miRNA	chr9:131006999-131007109
ENSG00000182824.6	AC008132.1	coding	chr22:18721426-18745407	ENSG00000253583.1	RP11-573J24.1.1	lncRNA	chr8:64498557-64501966	ENSG00000207581.1	MIR199B	miRNA	chr9:131006999-131007109
ENSG00000182824.6	AC008132.1	coding	chr22:18721426-18745407	ENSG00000243903.1	RP11-285B24.1.1	lncRNA	chr3:59365749-59374430	ENSG00000207581.1	MIR199B	miRNA	chr9:131006999-131007109
ENSG00000182824.6	AC008132.1	coding	chr22:18721426-18745407	ENSG00000229943.1	RP11-93N20.1.1	lncRNA	chr1:75428997-75430802	ENSG00000207581.1	MIR199B	miRNA	chr9:131006999-131007109
ENSG00000182824.6	AC008132.1	coding	chr22:18721426-18745407	ENSG00000228961.1	AP000282.3.1	lncRNA	chr21:34331195-34332874	ENSG00000198997.1	MIR107	miRNA	chr10:91352499-91352586
ENSG00000182824.6	AC008132.1	coding	chr22:18721426-18745407	ENSG00000259055.1	RP11-1140I5.1.1	lncRNA	chr14:51555674-51558006	ENSG00000207653.1	MIR558	miRNA	chr2:32757219-32757313
ENSG00000182824.6	AC008132.1	coding	chr22:18721426-18745407	ENSG00000258383.1	CTD-2200A16.1.1	lncRNA	chr14:99791135-99798352	ENSG00000207653.1	MIR558	miRNA	chr2:32757219-32757313
ENSG00000182824.6	AC008132.1	coding	chr22:18721426-18745407	ENSG00000253122.1	RP11-238I10.1.1	lncRNA	chr8:111621469-111644623	ENSG00000207775.1	MIR548A1	miRNA	chr6:18572014-18572111
ENSG00000182824.6	AC008132.1	coding	chr22:18721426-18745407	ENSG00000253122.1	RP11-238I10.1.1	lncRNA	chr8:111621469-111644623	ENSG00000207653.1	MIR558	miRNA	chr2:32757219-32757313
ENSG00000182824.6	AC008132.1	coding	chr22:18721426-18745407	ENSG00000223665.1	CTB-111F10.1.1	lncRNA	chr7:91268161-91272827	ENSG00000207653.1	MIR558	miRNA	chr2:32757219-32757313
ENSG00000182824.6	AC008132.1	coding	chr22:18721426-18745407	ENSG00000223665.1	CTB-111F10.1.1	lncRNA	chr7:91268161-91272827	ENSG00000198997.1	MIR107	miRNA	chr10:91352499-91352586
ENSG00000182824.6	AC008132.1	coding	chr22:18721426-18745407	ENSG00000227907.1	RP11-102C16.3.1	lncRNA	chr1:167021787-167027779	ENSG00000207775.1	MIR548A1	miRNA	chr6:18572014-18572111
ENSG00000182824.6	AC008132.1	coding	chr22:18721426-18745407	ENSG00000229118.1	AC068491.2.1	lncRNA	chr2:112022859-112037457	ENSG00000199150.1	MIRLET7G	miRNA	chr3:52302291-52302379
ENSG00000182824.6	AC008132.1	coding	chr22:18721426-18745407	ENSG00000229118.1	AC068491.2.1	lncRNA	chr2:112022859-112037457	ENSG00000207653.1	MIR558	miRNA	chr2:32757219-32757313
ENSG00000182824.6	AC008132.1	coding	chr22:18721426-18745407	ENSG00000229118.1	AC068491.2.1	lncRNA	chr2:112022859-112037457	ENSG00000207810.1	MIR519E	miRNA	chr19:54183193-54183277
ENSG00000182824.6	AC008132.1	coding	chr22:18721426-18745407	ENSG00000256484.1	RP13-507P19.1.1	lncRNA	chr12:131851204-131855604	ENSG00000199150.1	MIRLET7G	miRNA	chr3:52302291-52302379
ENSG00000182824.6	AC008132.1	coding	chr22:18721426-18745407	ENSG00000240354.1	RP11-774I5.1.1	lncRNA	chr3:161534696-161539696	ENSG00000198997.1	MIR107	miRNA	chr10:91352499-91352586
ENSG00000182824.6	AC008132.1	coding	chr22:18721426-18745407	ENSG00000232985.1	RP11-442O18.1.1	lncRNA	chr10:130757035-130758326	ENSG00000207653.1	MIR558	miRNA	chr2:32757219-32757313
ENSG00000182824.6	AC008132.1	coding	chr22:18721426-18745407	ENSG00000254194.1	RP1-273G13.3.1	lncRNA	chr8:33831218-33867113	ENSG00000207653.1	MIR558	miRNA	chr2:32757219-32757313
ENSG00000182824.6	AC008132.1	coding	chr22:18721426-18745407	ENSG00000227907.1	RP11-102C16.3.1	lncRNA	chr1:167021787-167027779	ENSG00000207810.1	MIR519E	miRNA	chr19:54183193-54183277
ENSG00000182824.6	AC008132.1	coding	chr22:18721426-18745407	ENSG00000226497.1	RP11-406O16.1.1	lncRNA	chr6:68936863-69039791	ENSG00000198997.1	MIR107	miRNA	chr10:91352499-91352586
ENSG00000182824.6	AC008132.1	coding	chr22:18721426-18745407	ENSG00000253583.1	RP11-573J24.1.1	lncRNA	chr8:64498557-64501966	ENSG00000198997.1	MIR107	miRNA	chr10:91352499-91352586
ENSG00000087087.13	SRRT	coding	chr7:100472732-100486285	ENSG00000249941.1	CTD-2046I8.1.1	lncRNA	chr5:4866633-4874872	ENSG00000221737.1	MIR548I1	miRNA	chr3:125509246-125509395
ENSG00000087087.13	SRRT	coding	chr7:100472732-100486285	ENSG00000260201.1	RP11-143N13.2.1	lncRNA	chr16:20592209-20598006	ENSG00000221737.1	MIR548I1	miRNA	chr3:125509246-125509395
ENSG00000039319.12	ZFYVE16	coding	chr5:79703831-79775169	ENSG00000249941.1	CTD-2046I8.1.1	lncRNA	chr5:4866633-4874872	ENSG00000221737.1	MIR548I1	miRNA	chr3:125509246-125509395
ENSG00000162727.3	OR2M5	coding	chr1:248308449-248309388	ENSG00000231040.1	AC103881.1.1	lncRNA	chr2:147595316-147607878	ENSG00000198984.1	MIR345	miRNA	chr14:100774195-100774293
ENSG00000162727.3	OR2M5	coding	chr1:248308449-248309388	ENSG00000231040.1	AC103881.1.1	lncRNA	chr2:147595316-147607878	ENSG00000207746.1	MIR575	miRNA	chr4:83674489-83674583
ENSG00000162727.3	OR2M5	coding	chr1:248308449-248309388	ENSG00000259055.1	RP11-1140I5.1.1	lncRNA	chr14:51555674-51558006	ENSG00000198984.1	MIR345	miRNA	chr14:100774195-100774293
ENSG00000162727.3	OR2M5	coding	chr1:248308449-248309388	ENSG00000258383.1	CTD-2200A16.1.1	lncRNA	chr14:99791135-99798352	ENSG00000198984.1	MIR345	miRNA	chr14:100774195-100774293
ENSG00000162727.3	OR2M5	coding	chr1:248308449-248309388	ENSG00000232193.1	AL157359.4.1	lncRNA	chr21:20290251-20308177	ENSG00000198984.1	MIR345	miRNA	chr14:100774195-100774293
ENSG00000162727.3	OR2M5	coding	chr1:248308449-248309388	ENSG00000253783.1	CTD-2534J5.1.1	lncRNA	chr8:140126435-140140196	ENSG00000198984.1	MIR345	miRNA	chr14:100774195-100774293
ENSG00000162727.3	OR2M5	coding	chr1:248308449-248309388	ENSG00000241636.1	RP11-71H9.2.1	lncRNA	chr3:164388665-164403864	ENSG00000198984.1	MIR345	miRNA	chr14:100774195-100774293
ENSG00000162727.3	OR2M5	coding	chr1:248308449-248309388	ENSG00000236634.1	AC016903.1.1	lncRNA	chr2:205334798-205338560	ENSG00000198984.1	MIR345	miRNA	chr14:100774195-100774293
ENSG00000162727.3	OR2M5	coding	chr1:248308449-248309388	ENSG00000257510.1	RP11-609L23.1.1	lncRNA	chr12:43009304-43040300	ENSG00000198984.1	MIR345	miRNA	chr14:100774195-100774293
ENSG00000162727.3	OR2M5	coding	chr1:248308449-248309388	ENSG00000254625.1	GS1-24F4.3.1	lncRNA	chr8:6786129-6787995	ENSG00000198984.1	MIR345	miRNA	chr14:100774195-100774293
ENSG00000162727.3	OR2M5	coding	chr1:248308449-248309388	ENSG00000249265.1	AC113167.2.1	lncRNA	chr5:89240726-89243390	ENSG00000198984.1	MIR345	miRNA	chr14:100774195-100774293
ENSG00000162727.3	OR2M5	coding	chr1:248308449-248309388	ENSG00000250921.1	CTD-2008N3.1.1	lncRNA	chr5:4135794-4143761	ENSG00000207746.1	MIR575	miRNA	chr4:83674489-83674583
ENSG00000162727.3	OR2M5	coding	chr1:248308449-248309388	ENSG00000241636.1	RP11-71H9.2.1	lncRNA	chr3:164388665-164403864	ENSG00000207746.1	MIR575	miRNA	chr4:83674489-83674583
ENSG00000162727.3	OR2M5	coding	chr1:248308449-248309388	ENSG00000257510.1	RP11-609L23.1.1	lncRNA	chr12:43009304-43040300	ENSG00000207746.1	MIR575	miRNA	chr4:83674489-83674583
ENSG00000162727.3	OR2M5	coding	chr1:248308449-248309388	ENSG00000230686.1	AC067945.2.1	lncRNA	chr2:191882679-191883805	ENSG00000207746.1	MIR575	miRNA	chr4:83674489-83674583
ENSG00000162727.3	OR2M5	coding	chr1:248308449-248309388	ENSG00000249831.2	RP11-4O3.2.1	lncRNA	chr4:58586200-58590821	ENSG00000207746.1	MIR575	miRNA	chr4:83674489-83674583
ENSG00000162727.3	OR2M5	coding	chr1:248308449-248309388	ENSG00000250340.1	RP11-577G20.1.1	lncRNA	chr4:59390679-59402493	ENSG00000207746.1	MIR575	miRNA	chr4:83674489-83674583
ENSG00000162727.3	OR2M5	coding	chr1:248308449-248309388	ENSG00000249265.1	AC113167.2.1	lncRNA	chr5:89240726-89243390	ENSG00000207746.1	MIR575	miRNA	chr4:83674489-83674583
ENSG00000088002.6	SULT2B1	coding	chr19:49055428-49102683	ENSG00000249941.1	CTD-2046I8.1.1	lncRNA	chr5:4866633-4874872	ENSG00000221737.1	MIR548I1	miRNA	chr3:125509246-125509395
ENSG00000183938.5	TRBV21OR9-2	coding	chr9:33629118-33629584	ENSG00000231774.1	RP11-402P6.11.1	lncRNA	chrX:70980624-70981509	ENSG00000207965.1	MIR629	miRNA	chr15:70371710-70371807
ENSG00000183938.5	TRBV21OR9-2	coding	chr9:33629118-33629584	ENSG00000231774.1	RP11-402P6.11.1	lncRNA	chrX:70980624-70981509	ENSG00000207756.1	MIR580	miRNA	chr5:36147993-36148090
ENSG00000183938.5	TRBV21OR9-2	coding	chr9:33629118-33629584	ENSG00000231774.1	RP11-402P6.11.1	lncRNA	chrX:70980624-70981509	ENSG00000198997.1	MIR107	miRNA	chr10:91352499-91352586
ENSG00000183938.5	TRBV21OR9-2	coding	chr9:33629118-33629584	ENSG00000258607.1	RP11-701B16.3.1	lncRNA	chr14:60007400-60031208	ENSG00000207810.1	MIR519E	miRNA	chr19:54183193-54183277
ENSG00000183938.5	TRBV21OR9-2	coding	chr9:33629118-33629584	ENSG00000251371.1	CTD-2318H23.1.1	lncRNA	chr5:4640843-4648367	ENSG00000207587.1	MIR544A	miRNA	chr14:101514994-101515085
ENSG00000183938.5	TRBV21OR9-2	coding	chr9:33629118-33629584	ENSG00000248736.1	RP11-35O7.1.1	lncRNA	chr5:2965119-2967742	ENSG00000207587.1	MIR544A	miRNA	chr14:101514994-101515085
ENSG00000183938.5	TRBV21OR9-2	coding	chr9:33629118-33629584	ENSG00000236436.1	AC012361.1.1	lncRNA	chr2:21059530-21061421	ENSG00000207587.1	MIR544A	miRNA	chr14:101514994-101515085
ENSG00000183938.5	TRBV21OR9-2	coding	chr9:33629118-33629584	ENSG00000224211.1	RP11-536D16.2.1	lncRNA	chr9:16121130-16122432	ENSG00000207587.1	MIR544A	miRNA	chr14:101514994-101515085
ENSG00000183938.5	TRBV21OR9-2	coding	chr9:33629118-33629584	ENSG00000248518.1	RP11-231C18.2.1	lncRNA	chr4:55242168-55242919	ENSG00000207587.1	MIR544A	miRNA	chr14:101514994-101515085
ENSG00000183938.5	TRBV21OR9-2	coding	chr9:33629118-33629584	ENSG00000232964.1	RP11-543E8.1.1	lncRNA	chr1:230728405-230731329	ENSG00000207587.1	MIR544A	miRNA	chr14:101514994-101515085
ENSG00000183938.5	TRBV21OR9-2	coding	chr9:33629118-33629584	ENSG00000260223.1	RP11-293N14.1.1	lncRNA	chr16:76141180-76181704	ENSG00000207587.1	MIR544A	miRNA	chr14:101514994-101515085
ENSG00000183938.5	TRBV21OR9-2	coding	chr9:33629118-33629584	ENSG00000244008.1	RP11-321E8.3.1	lncRNA	chr7:63580808-63611099	ENSG00000207587.1	MIR544A	miRNA	chr14:101514994-101515085
ENSG00000183938.5	TRBV21OR9-2	coding	chr9:33629118-33629584	ENSG00000246695.3	RP11-877E17.2.1	lncRNA	chr12:26092261-26112698	ENSG00000207587.1	MIR544A	miRNA	chr14:101514994-101515085
ENSG00000183938.5	TRBV21OR9-2	coding	chr9:33629118-33629584	ENSG00000231813.1	RP11-474I16.1.1	lncRNA	chr1:161607437-161608218	ENSG00000207587.1	MIR544A	miRNA	chr14:101514994-101515085
ENSG00000183938.5	TRBV21OR9-2	coding	chr9:33629118-33629584	ENSG00000224933.1	RP11-20O12.1.1	lncRNA	chr13:76587158-76588637	ENSG00000207587.1	MIR544A	miRNA	chr14:101514994-101515085
ENSG00000183938.5	TRBV21OR9-2	coding	chr9:33629118-33629584	ENSG00000253985.1	RP11-136K7.3.1	lncRNA	chr5:70668502-70670725	ENSG00000207587.1	MIR544A	miRNA	chr14:101514994-101515085
ENSG00000183938.5	TRBV21OR9-2	coding	chr9:33629118-33629584	ENSG00000223870.1	AP000233.3.1	lncRNA	chr21:26499781-26507561	ENSG00000207587.1	MIR544A	miRNA	chr14:101514994-101515085
ENSG00000183938.5	TRBV21OR9-2	coding	chr9:33629118-33629584	ENSG00000254394.1	CTD-2272D18.1.1	lncRNA	chr8:83824338-83874161	ENSG00000207587.1	MIR544A	miRNA	chr14:101514994-101515085
ENSG00000183938.5	TRBV21OR9-2	coding	chr9:33629118-33629584	ENSG00000261029.1	CTD-2588J6.2.1	lncRNA	chr16:82203900-82209408	ENSG00000207587.1	MIR544A	miRNA	chr14:101514994-101515085
ENSG00000183938.5	TRBV21OR9-2	coding	chr9:33629118-33629584	ENSG00000251376.1	CTD-2313F11.2.1	lncRNA	chr5:54350255-54350968	ENSG00000207587.1	MIR544A	miRNA	chr14:101514994-101515085
ENSG00000183938.5	TRBV21OR9-2	coding	chr9:33629118-33629584	ENSG00000233403.1	RP11-86A5.1.1	lncRNA	chrX:25896455-25911661	ENSG00000207587.1	MIR544A	miRNA	chr14:101514994-101515085
ENSG00000183938.5	TRBV21OR9-2	coding	chr9:33629118-33629584	ENSG00000226861.1	RP5-1119O21.2.1	lncRNA	chr10:8340859-8343630	ENSG00000207587.1	MIR544A	miRNA	chr14:101514994-101515085
ENSG00000183938.5	TRBV21OR9-2	coding	chr9:33629118-33629584	ENSG00000214407.3	RP11-221J22.1.1	lncRNA	chr3:101659702-101716770	ENSG00000207587.1	MIR544A	miRNA	chr14:101514994-101515085
ENSG00000183938.5	TRBV21OR9-2	coding	chr9:33629118-33629584	ENSG00000260706.1	RP11-525K10.1.1	lncRNA	chr16:80099732-80201474	ENSG00000207587.1	MIR544A	miRNA	chr14:101514994-101515085
ENSG00000183938.5	TRBV21OR9-2	coding	chr9:33629118-33629584	ENSG00000206062.4	RP13-212L9.1.1	lncRNA	chrX:90562779-90563877	ENSG00000207587.1	MIR544A	miRNA	chr14:101514994-101515085
ENSG00000183938.5	TRBV21OR9-2	coding	chr9:33629118-33629584	ENSG00000235221.1	RP11-459J23.1.1	lncRNA	chr13:69885464-69896233	ENSG00000207587.1	MIR544A	miRNA	chr14:101514994-101515085
ENSG00000183938.5	TRBV21OR9-2	coding	chr9:33629118-33629584	ENSG00000237534.1	RP11-501G6.1.1	lncRNA	chr13:69796477-69866286	ENSG00000207587.1	MIR544A	miRNA	chr14:101514994-101515085
ENSG00000183938.5	TRBV21OR9-2	coding	chr9:33629118-33629584	ENSG00000238007.1	AC024619.2.1	lncRNA	chr17:27339882-27343530	ENSG00000207587.1	MIR544A	miRNA	chr14:101514994-101515085
ENSG00000183938.5	TRBV21OR9-2	coding	chr9:33629118-33629584	ENSG00000226181.1	RP1-92C8.3.1	lncRNA	chr6:117772292-117774688	ENSG00000207587.1	MIR544A	miRNA	chr14:101514994-101515085
ENSG00000183938.5	TRBV21OR9-2	coding	chr9:33629118-33629584	ENSG00000232113.1	RP11-360D2.1.1	lncRNA	chr1:173604911-173606273	ENSG00000207587.1	MIR544A	miRNA	chr14:101514994-101515085
ENSG00000183938.5	TRBV21OR9-2	coding	chr9:33629118-33629584	ENSG00000257837.1	RP11-263K4.4.1	lncRNA	chr12:82898989-82899967	ENSG00000207587.1	MIR544A	miRNA	chr14:101514994-101515085
ENSG00000183938.5	TRBV21OR9-2	coding	chr9:33629118-33629584	ENSG00000237057.1	AC015922.6.1	lncRNA	chr17:15709979-15720943	ENSG00000207587.1	MIR544A	miRNA	chr14:101514994-101515085
ENSG00000183938.5	TRBV21OR9-2	coding	chr9:33629118-33629584	ENSG00000223438.1	RP1-171K16.5.1	lncRNA	chrX:140713993-140714863	ENSG00000207587.1	MIR544A	miRNA	chr14:101514994-101515085
ENSG00000183938.5	TRBV21OR9-2	coding	chr9:33629118-33629584	ENSG00000236436.1	AC012361.1.1	lncRNA	chr2:21059530-21061421	ENSG00000207656.1	MIR489	miRNA	chr7:93113247-93113331
ENSG00000183938.5	TRBV21OR9-2	coding	chr9:33629118-33629584	ENSG00000251662.2	CTC-369A16.3.1	lncRNA	chr5:123731639-123736348	ENSG00000207656.1	MIR489	miRNA	chr7:93113247-93113331
ENSG00000183938.5	TRBV21OR9-2	coding	chr9:33629118-33629584	ENSG00000260223.1	RP11-293N14.1.1	lncRNA	chr16:76141180-76181704	ENSG00000207656.1	MIR489	miRNA	chr7:93113247-93113331
ENSG00000183938.5	TRBV21OR9-2	coding	chr9:33629118-33629584	ENSG00000224515.1	RP11-5K23.5.1	lncRNA	chr1:161526079-161526868	ENSG00000207656.1	MIR489	miRNA	chr7:93113247-93113331
ENSG00000183938.5	TRBV21OR9-2	coding	chr9:33629118-33629584	ENSG00000253783.1	CTD-2534J5.1.1	lncRNA	chr8:140126435-140140196	ENSG00000207656.1	MIR489	miRNA	chr7:93113247-93113331
ENSG00000183938.5	TRBV21OR9-2	coding	chr9:33629118-33629584	ENSG00000253583.1	RP11-573J24.1.1	lncRNA	chr8:64498557-64501966	ENSG00000207656.1	MIR489	miRNA	chr7:93113247-93113331
ENSG00000183938.5	TRBV21OR9-2	coding	chr9:33629118-33629584	ENSG00000251376.1	CTD-2313F11.2.1	lncRNA	chr5:54350255-54350968	ENSG00000207656.1	MIR489	miRNA	chr7:93113247-93113331
ENSG00000183938.5	TRBV21OR9-2	coding	chr9:33629118-33629584	ENSG00000206062.4	RP13-212L9.1.1	lncRNA	chrX:90562779-90563877	ENSG00000207656.1	MIR489	miRNA	chr7:93113247-93113331
ENSG00000183938.5	TRBV21OR9-2	coding	chr9:33629118-33629584	ENSG00000224091.1	AC104389.16.1	lncRNA	chr11:5226270-5228538	ENSG00000207656.1	MIR489	miRNA	chr7:93113247-93113331
ENSG00000183938.5	TRBV21OR9-2	coding	chr9:33629118-33629584	ENSG00000226133.1	RP4-683M8.2.1	lncRNA	chr1:48519216-48532873	ENSG00000207656.1	MIR489	miRNA	chr7:93113247-93113331
ENSG00000183938.5	TRBV21OR9-2	coding	chr9:33629118-33629584	ENSG00000250488.1	RP11-6C14.1.1	lncRNA	chr4:160587654-160698936	ENSG00000207656.1	MIR489	miRNA	chr7:93113247-93113331
ENSG00000183938.5	TRBV21OR9-2	coding	chr9:33629118-33629584	ENSG00000237057.1	AC015922.6.1	lncRNA	chr17:15709979-15720943	ENSG00000207656.1	MIR489	miRNA	chr7:93113247-93113331
ENSG00000183938.5	TRBV21OR9-2	coding	chr9:33629118-33629584	ENSG00000261790.1	AC005606.14.1	lncRNA	chr16:2034877-2040358	ENSG00000207929.1	MIR195	miRNA	chr17:6920933-6921020
ENSG00000183938.5	TRBV21OR9-2	coding	chr9:33629118-33629584	ENSG00000244968.2	LIFR-AS1	lncRNA	chr5:38556887-38671318	ENSG00000207965.1	MIR629	miRNA	chr15:70371710-70371807
ENSG00000183938.5	TRBV21OR9-2	coding	chr9:33629118-33629584	ENSG00000244968.2	LIFR-AS1	lncRNA	chr5:38556887-38671318	ENSG00000207725.1	MIR222	miRNA	chrX:45606420-45606530
ENSG00000183938.5	TRBV21OR9-2	coding	chr9:33629118-33629584	ENSG00000236914.3	RP11-1008C21.2.1	lncRNA	chr15:38361681-38365160	ENSG00000207965.1	MIR629	miRNA	chr15:70371710-70371807
ENSG00000183938.5	TRBV21OR9-2	coding	chr9:33629118-33629584	ENSG00000236914.3	RP11-1008C21.2.1	lncRNA	chr15:38361681-38365160	ENSG00000207756.1	MIR580	miRNA	chr5:36147993-36148090
ENSG00000183938.5	TRBV21OR9-2	coding	chr9:33629118-33629584	ENSG00000236914.3	RP11-1008C21.2.1	lncRNA	chr15:38361681-38365160	ENSG00000207725.1	MIR222	miRNA	chrX:45606420-45606530
ENSG00000183938.5	TRBV21OR9-2	coding	chr9:33629118-33629584	ENSG00000236914.3	RP11-1008C21.2.1	lncRNA	chr15:38361681-38365160	ENSG00000198997.1	MIR107	miRNA	chr10:91352499-91352586
ENSG00000183938.5	TRBV21OR9-2	coding	chr9:33629118-33629584	ENSG00000236436.1	AC012361.1.1	lncRNA	chr2:21059530-21061421	ENSG00000207756.1	MIR580	miRNA	chr5:36147993-36148090
ENSG00000183938.5	TRBV21OR9-2	coding	chr9:33629118-33629584	ENSG00000236436.1	AC012361.1.1	lncRNA	chr2:21059530-21061421	ENSG00000198997.1	MIR107	miRNA	chr10:91352499-91352586
ENSG00000183938.5	TRBV21OR9-2	coding	chr9:33629118-33629584	ENSG00000251662.2	CTC-369A16.3.1	lncRNA	chr5:123731639-123736348	ENSG00000198997.1	MIR107	miRNA	chr10:91352499-91352586
ENSG00000183938.5	TRBV21OR9-2	coding	chr9:33629118-33629584	ENSG00000226053.1	RP5-1070A16.1.1	lncRNA	chr1:98676302-98738214	ENSG00000198997.1	MIR107	miRNA	chr10:91352499-91352586
ENSG00000183938.5	TRBV21OR9-2	coding	chr9:33629118-33629584	ENSG00000224918.1	AY269186.2.1	lncRNA	chr3:95030-96029	ENSG00000198997.1	MIR107	miRNA	chr10:91352499-91352586
ENSG00000183938.5	TRBV21OR9-2	coding	chr9:33629118-33629584	ENSG00000229882.1	RP13-30A9.2.1	lncRNA	chr20:61265123-61267214	ENSG00000207965.1	MIR629	miRNA	chr15:70371710-70371807
ENSG00000183938.5	TRBV21OR9-2	coding	chr9:33629118-33629584	ENSG00000229882.1	RP13-30A9.2.1	lncRNA	chr20:61265123-61267214	ENSG00000207756.1	MIR580	miRNA	chr5:36147993-36148090
ENSG00000183938.5	TRBV21OR9-2	coding	chr9:33629118-33629584	ENSG00000229882.1	RP13-30A9.2.1	lncRNA	chr20:61265123-61267214	ENSG00000198997.1	MIR107	miRNA	chr10:91352499-91352586
ENSG00000183938.5	TRBV21OR9-2	coding	chr9:33629118-33629584	ENSG00000227090.1	AP000402.3.1	lncRNA	chr21:26258989-26275070	ENSG00000207965.1	MIR629	miRNA	chr15:70371710-70371807
ENSG00000183938.5	TRBV21OR9-2	coding	chr9:33629118-33629584	ENSG00000227090.1	AP000402.3.1	lncRNA	chr21:26258989-26275070	ENSG00000207756.1	MIR580	miRNA	chr5:36147993-36148090
ENSG00000183938.5	TRBV21OR9-2	coding	chr9:33629118-33629584	ENSG00000227090.1	AP000402.3.1	lncRNA	chr21:26258989-26275070	ENSG00000198997.1	MIR107	miRNA	chr10:91352499-91352586
ENSG00000183938.5	TRBV21OR9-2	coding	chr9:33629118-33629584	ENSG00000228795.1	RP11-436F21.3.1	lncRNA	chr9:106006007-106015452	ENSG00000207965.1	MIR629	miRNA	chr15:70371710-70371807
ENSG00000183938.5	TRBV21OR9-2	coding	chr9:33629118-33629584	ENSG00000228795.1	RP11-436F21.3.1	lncRNA	chr9:106006007-106015452	ENSG00000207756.1	MIR580	miRNA	chr5:36147993-36148090
ENSG00000183938.5	TRBV21OR9-2	coding	chr9:33629118-33629584	ENSG00000228795.1	RP11-436F21.3.1	lncRNA	chr9:106006007-106015452	ENSG00000198997.1	MIR107	miRNA	chr10:91352499-91352586
ENSG00000183938.5	TRBV21OR9-2	coding	chr9:33629118-33629584	ENSG00000229379.1	AC006041.1.1	lncRNA	chr7:15880921-15881985	ENSG00000207965.1	MIR629	miRNA	chr15:70371710-70371807
ENSG00000183938.5	TRBV21OR9-2	coding	chr9:33629118-33629584	ENSG00000229379.1	AC006041.1.1	lncRNA	chr7:15880921-15881985	ENSG00000207756.1	MIR580	miRNA	chr5:36147993-36148090
ENSG00000183938.5	TRBV21OR9-2	coding	chr9:33629118-33629584	ENSG00000229379.1	AC006041.1.1	lncRNA	chr7:15880921-15881985	ENSG00000198997.1	MIR107	miRNA	chr10:91352499-91352586
ENSG00000183938.5	TRBV21OR9-2	coding	chr9:33629118-33629584	ENSG00000253403.1	RP11-348M17.2.1	lncRNA	chr5:161114352-161116414	ENSG00000207965.1	MIR629	miRNA	chr15:70371710-70371807
ENSG00000183938.5	TRBV21OR9-2	coding	chr9:33629118-33629584	ENSG00000253403.1	RP11-348M17.2.1	lncRNA	chr5:161114352-161116414	ENSG00000198997.1	MIR107	miRNA	chr10:91352499-91352586
ENSG00000183938.5	TRBV21OR9-2	coding	chr9:33629118-33629584	ENSG00000238004.1	AC009227.3.1	lncRNA	chr2:155316368-155317332	ENSG00000198997.1	MIR107	miRNA	chr10:91352499-91352586
ENSG00000183938.5	TRBV21OR9-2	coding	chr9:33629118-33629584	ENSG00000224211.1	RP11-536D16.2.1	lncRNA	chr9:16121130-16122432	ENSG00000207965.1	MIR629	miRNA	chr15:70371710-70371807
ENSG00000183938.5	TRBV21OR9-2	coding	chr9:33629118-33629584	ENSG00000224933.1	RP11-20O12.1.1	lncRNA	chr13:76587158-76588637	ENSG00000207965.1	MIR629	miRNA	chr15:70371710-70371807
ENSG00000183938.5	TRBV21OR9-2	coding	chr9:33629118-33629584	ENSG00000259149.1	RP11-313C4.1.1	lncRNA	chr14:42728933-42737789	ENSG00000207965.1	MIR629	miRNA	chr15:70371710-70371807
ENSG00000183938.5	TRBV21OR9-2	coding	chr9:33629118-33629584	ENSG00000233763.1	RP1-40E16.3.1	lncRNA	chr6:3051334-3053998	ENSG00000207965.1	MIR629	miRNA	chr15:70371710-70371807
ENSG00000183938.5	TRBV21OR9-2	coding	chr9:33629118-33629584	ENSG00000228488.1	AC092168.4.1	lncRNA	chr2:101338682-101339344	ENSG00000207965.1	MIR629	miRNA	chr15:70371710-70371807
ENSG00000183938.5	TRBV21OR9-2	coding	chr9:33629118-33629584	ENSG00000223870.1	AP000233.3.1	lncRNA	chr21:26499781-26507561	ENSG00000207965.1	MIR629	miRNA	chr15:70371710-70371807
ENSG00000183938.5	TRBV21OR9-2	coding	chr9:33629118-33629584	ENSG00000261029.1	CTD-2588J6.2.1	lncRNA	chr16:82203900-82209408	ENSG00000207965.1	MIR629	miRNA	chr15:70371710-70371807
ENSG00000183938.5	TRBV21OR9-2	coding	chr9:33629118-33629584	ENSG00000260706.1	RP11-525K10.1.1	lncRNA	chr16:80099732-80201474	ENSG00000207965.1	MIR629	miRNA	chr15:70371710-70371807
ENSG00000183938.5	TRBV21OR9-2	coding	chr9:33629118-33629584	ENSG00000226181.1	RP1-92C8.3.1	lncRNA	chr6:117772292-117774688	ENSG00000207965.1	MIR629	miRNA	chr15:70371710-70371807
ENSG00000183938.5	TRBV21OR9-2	coding	chr9:33629118-33629584	ENSG00000257920.1	RP11-541G9.2.1	lncRNA	chr12:97666469-97669987	ENSG00000207965.1	MIR629	miRNA	chr15:70371710-70371807
ENSG00000183938.5	TRBV21OR9-2	coding	chr9:33629118-33629584	ENSG00000197644.2	AC106870.2.1	lncRNA	chr2:30122462-30130065	ENSG00000221634.1	MIR1276	miRNA	chr15:86313726-86313809
ENSG00000183938.5	TRBV21OR9-2	coding	chr9:33629118-33629584	ENSG00000197644.2	AC106870.2.1	lncRNA	chr2:30122462-30130065	ENSG00000207738.1	MIR520C	miRNA	chr19:54210706-54210793
ENSG00000183938.5	TRBV21OR9-2	coding	chr9:33629118-33629584	ENSG00000197644.2	AC106870.2.1	lncRNA	chr2:30122462-30130065	ENSG00000198997.1	MIR107	miRNA	chr10:91352499-91352586
ENSG00000183938.5	TRBV21OR9-2	coding	chr9:33629118-33629584	ENSG00000197644.2	AC106870.2.1	lncRNA	chr2:30122462-30130065	ENSG00000208009.1	MIR130A	miRNA	chr11:57408670-57408759
ENSG00000183938.5	TRBV21OR9-2	coding	chr9:33629118-33629584	ENSG00000249808.1	CTD-2029E14.1.1	lncRNA	chr5:3178208-3181346	ENSG00000207568.1	MIR203	miRNA	chr14:104583741-104583851
ENSG00000183938.5	TRBV21OR9-2	coding	chr9:33629118-33629584	ENSG00000236322.1	RP11-327I22.8.1	lncRNA	chr9:43184022-43189411	ENSG00000207568.1	MIR203	miRNA	chr14:104583741-104583851
ENSG00000183938.5	TRBV21OR9-2	coding	chr9:33629118-33629584	ENSG00000250665.1	RP11-775H9.1.1	lncRNA	chr4:137047063-137060029	ENSG00000207568.1	MIR203	miRNA	chr14:104583741-104583851
ENSG00000183938.5	TRBV21OR9-2	coding	chr9:33629118-33629584	ENSG00000231090.1	RP11-101C11.1.1	lncRNA	chr1:55683533-55699850	ENSG00000207568.1	MIR203	miRNA	chr14:104583741-104583851
ENSG00000183938.5	TRBV21OR9-2	coding	chr9:33629118-33629584	ENSG00000237057.1	AC015922.6.1	lncRNA	chr17:15709979-15720943	ENSG00000207568.1	MIR203	miRNA	chr14:104583741-104583851
ENSG00000183938.5	TRBV21OR9-2	coding	chr9:33629118-33629584	ENSG00000248518.1	RP11-231C18.2.1	lncRNA	chr4:55242168-55242919	ENSG00000207929.1	MIR195	miRNA	chr17:6920933-6921020
ENSG00000183938.5	TRBV21OR9-2	coding	chr9:33629118-33629584	ENSG00000253583.1	RP11-573J24.1.1	lncRNA	chr8:64498557-64501966	ENSG00000221634.1	MIR1276	miRNA	chr15:86313726-86313809
ENSG00000183938.5	TRBV21OR9-2	coding	chr9:33629118-33629584	ENSG00000255628.1	RP11-313F23.3.1	lncRNA	chr12:34302773-34315173	ENSG00000221634.1	MIR1276	miRNA	chr15:86313726-86313809
ENSG00000183938.5	TRBV21OR9-2	coding	chr9:33629118-33629584	ENSG00000224515.1	RP11-5K23.5.1	lncRNA	chr1:161526079-161526868	ENSG00000207738.1	MIR520C	miRNA	chr19:54210706-54210793
ENSG00000183938.5	TRBV21OR9-2	coding	chr9:33629118-33629584	ENSG00000254434.1	CTD-2555I5.1.1	lncRNA	chr11:80032663-80038955	ENSG00000207928.1	MIR632	miRNA	chr17:30677127-30677221
ENSG00000183938.5	TRBV21OR9-2	coding	chr9:33629118-33629584	ENSG00000223720.1	RP5-1024N4.2.1	lncRNA	chr1:48671636-48672515	ENSG00000207756.1	MIR580	miRNA	chr5:36147993-36148090
ENSG00000183938.5	TRBV21OR9-2	coding	chr9:33629118-33629584	ENSG00000223870.1	AP000233.3.1	lncRNA	chr21:26499781-26507561	ENSG00000207756.1	MIR580	miRNA	chr5:36147993-36148090
ENSG00000183938.5	TRBV21OR9-2	coding	chr9:33629118-33629584	ENSG00000261029.1	CTD-2588J6.2.1	lncRNA	chr16:82203900-82209408	ENSG00000207756.1	MIR580	miRNA	chr5:36147993-36148090
ENSG00000183938.5	TRBV21OR9-2	coding	chr9:33629118-33629584	ENSG00000233835.1	RP1-92C4.2.1	lncRNA	chr6:80581589-80584327	ENSG00000207756.1	MIR580	miRNA	chr5:36147993-36148090
ENSG00000183938.5	TRBV21OR9-2	coding	chr9:33629118-33629584	ENSG00000260706.1	RP11-525K10.1.1	lncRNA	chr16:80099732-80201474	ENSG00000207756.1	MIR580	miRNA	chr5:36147993-36148090
ENSG00000183938.5	TRBV21OR9-2	coding	chr9:33629118-33629584	ENSG00000250974.1	RP11-122F24.1.1	lncRNA	chr5:6933782-7190925	ENSG00000207928.1	MIR632	miRNA	chr17:30677127-30677221
ENSG00000183938.5	TRBV21OR9-2	coding	chr9:33629118-33629584	ENSG00000206062.4	RP13-212L9.1.1	lncRNA	chrX:90562779-90563877	ENSG00000207725.1	MIR222	miRNA	chrX:45606420-45606530
ENSG00000183938.5	TRBV21OR9-2	coding	chr9:33629118-33629584	ENSG00000206062.4	RP13-212L9.1.1	lncRNA	chrX:90562779-90563877	ENSG00000207738.1	MIR520C	miRNA	chr19:54210706-54210793
ENSG00000183938.5	TRBV21OR9-2	coding	chr9:33629118-33629584	ENSG00000250488.1	RP11-6C14.1.1	lncRNA	chr4:160587654-160698936	ENSG00000207738.1	MIR520C	miRNA	chr19:54210706-54210793
ENSG00000183938.5	TRBV21OR9-2	coding	chr9:33629118-33629584	ENSG00000240792.1	RP11-418B12.1.1	lncRNA	chr3:163192854-163197153	ENSG00000207738.1	MIR520C	miRNA	chr19:54210706-54210793
ENSG00000183938.5	TRBV21OR9-2	coding	chr9:33629118-33629584	ENSG00000235533.1	RP11-284P20.3.1	lncRNA	chr9:14025969-14030114	ENSG00000207810.1	MIR519E	miRNA	chr19:54183193-54183277
ENSG00000183938.5	TRBV21OR9-2	coding	chr9:33629118-33629584	ENSG00000249932.1	RP11-395P13.2.1	lncRNA	chr5:124704260-124704842	ENSG00000198997.1	MIR107	miRNA	chr10:91352499-91352586
ENSG00000183938.5	TRBV21OR9-2	coding	chr9:33629118-33629584	ENSG00000260202.1	RP3-333B15.4.1	lncRNA	chr20:23497520-23498706	ENSG00000207929.1	MIR195	miRNA	chr17:6920933-6921020
ENSG00000183938.5	TRBV21OR9-2	coding	chr9:33629118-33629584	ENSG00000224091.1	AC104389.16.1	lncRNA	chr11:5226270-5228538	ENSG00000207929.1	MIR195	miRNA	chr17:6920933-6921020
ENSG00000183938.5	TRBV21OR9-2	coding	chr9:33629118-33629584	ENSG00000241921.1	AC000370.2.1	lncRNA	chr7:126019023-126064239	ENSG00000208009.1	MIR130A	miRNA	chr11:57408670-57408759
ENSG00000183938.5	TRBV21OR9-2	coding	chr9:33629118-33629584	ENSG00000259035.1	RP11-666E17.1.1	lncRNA	chr14:82207345-82496693	ENSG00000198997.1	MIR107	miRNA	chr10:91352499-91352586
ENSG00000183938.5	TRBV21OR9-2	coding	chr9:33629118-33629584	ENSG00000253583.1	RP11-573J24.1.1	lncRNA	chr8:64498557-64501966	ENSG00000198997.1	MIR107	miRNA	chr10:91352499-91352586
ENSG00000183938.5	TRBV21OR9-2	coding	chr9:33629118-33629584	ENSG00000253583.1	RP11-573J24.1.1	lncRNA	chr8:64498557-64501966	ENSG00000207928.1	MIR632	miRNA	chr17:30677127-30677221
ENSG00000183938.5	TRBV21OR9-2	coding	chr9:33629118-33629584	ENSG00000250665.1	RP11-775H9.1.1	lncRNA	chr4:137047063-137060029	ENSG00000198997.1	MIR107	miRNA	chr10:91352499-91352586
ENSG00000183938.5	TRBV21OR9-2	coding	chr9:33629118-33629584	ENSG00000233403.1	RP11-86A5.1.1	lncRNA	chrX:25896455-25911661	ENSG00000207688.1	MIR548D2	miRNA	chr17:65467604-65467701
ENSG00000183938.5	TRBV21OR9-2	coding	chr9:33629118-33629584	ENSG00000257837.1	RP11-263K4.4.1	lncRNA	chr12:82898989-82899967	ENSG00000207928.1	MIR632	miRNA	chr17:30677127-30677221
ENSG00000206104.2	KRTAP20-3	coding	chr21:32015182-32015455	ENSG00000232597.1	AC013727.1.1	lncRNA	chr2:104473427-104496667	ENSG00000207996.1	MIR301A	miRNA	chr17:57228496-57228582
ENSG00000177684.3	DEFB114	coding	chr6:49927961-49931818	ENSG00000232597.1	AC013727.1.1	lncRNA	chr2:104473427-104496667	ENSG00000207656.1	MIR489	miRNA	chr7:93113247-93113331
ENSG00000177684.3	DEFB114	coding	chr6:49927961-49931818	ENSG00000232597.1	AC013727.1.1	lncRNA	chr2:104473427-104496667	ENSG00000221522.1	MIR548AC	miRNA	chr4:104343256-104343353
ENSG00000177684.3	DEFB114	coding	chr6:49927961-49931818	ENSG00000232597.1	AC013727.1.1	lncRNA	chr2:104473427-104496667	ENSG00000207775.1	MIR548A1	miRNA	chr6:18572014-18572111
ENSG00000177684.3	DEFB114	coding	chr6:49927961-49931818	ENSG00000232597.1	AC013727.1.1	lncRNA	chr2:104473427-104496667	ENSG00000207784.1	MIR542	miRNA	chrX:133675370-133675467
ENSG00000177684.3	DEFB114	coding	chr6:49927961-49931818	ENSG00000232597.1	AC013727.1.1	lncRNA	chr2:104473427-104496667	ENSG00000207996.1	MIR301A	miRNA	chr17:57228496-57228582
ENSG00000177684.3	DEFB114	coding	chr6:49927961-49931818	ENSG00000232597.1	AC013727.1.1	lncRNA	chr2:104473427-104496667	ENSG00000207813.1	MIR605	miRNA	chr10:53059332-53059415
ENSG00000177684.3	DEFB114	coding	chr6:49927961-49931818	ENSG00000232597.1	AC013727.1.1	lncRNA	chr2:104473427-104496667	ENSG00000208009.1	MIR130A	miRNA	chr11:57408670-57408759
ENSG00000177684.3	DEFB114	coding	chr6:49927961-49931818	ENSG00000232597.1	AC013727.1.1	lncRNA	chr2:104473427-104496667	ENSG00000207820.1	MIR545	miRNA	chrX:73506938-73507044
ENSG00000198657.3	OR8B4	coding	chr11:124293806-124294789	ENSG00000232597.1	AC013727.1.1	lncRNA	chr2:104473427-104496667	ENSG00000207633.1	MIR505	miRNA	chrX:139006306-139006390
ENSG00000198657.3	OR8B4	coding	chr11:124293806-124294789	ENSG00000232597.1	AC013727.1.1	lncRNA	chr2:104473427-104496667	ENSG00000207609.1	MIR491	miRNA	chr9:20716103-20716187
ENSG00000253782.1	RP11-350F16.2.1	coding	chr8:47842461-47846068	ENSG00000232597.1	AC013727.1.1	lncRNA	chr2:104473427-104496667	ENSG00000207649.1	MIR138-2	miRNA	chr16:56892429-56892513
ENSG00000198567.5	AP000552.1	coding	chr22:21645341-21648982	ENSG00000232597.1	AC013727.1.1	lncRNA	chr2:104473427-104496667	ENSG00000207649.1	MIR138-2	miRNA	chr16:56892429-56892513
ENSG00000186092.4	OR4F5	coding	chr1:69090-70008	ENSG00000232597.1	AC013727.1.1	lncRNA	chr2:104473427-104496667	ENSG00000207649.1	MIR138-2	miRNA	chr16:56892429-56892513
ENSG00000236029.3	AL953854.2.1	coding	chr9:47295854-47314322	ENSG00000232597.1	AC013727.1.1	lncRNA	chr2:104473427-104496667	ENSG00000207649.1	MIR138-2	miRNA	chr16:56892429-56892513
ENSG00000184394.1	OR4N5	coding	chr14:20611894-20612821	ENSG00000232597.1	AC013727.1.1	lncRNA	chr2:104473427-104496667	ENSG00000207649.1	MIR138-2	miRNA	chr16:56892429-56892513
ENSG00000211872.1	TRAJ17	coding	chr14:22995811-22995874	ENSG00000232597.1	AC013727.1.1	lncRNA	chr2:104473427-104496667	ENSG00000207649.1	MIR138-2	miRNA	chr16:56892429-56892513
ENSG00000221900.3	POM121L12	coding	chr7:53103334-53104617	ENSG00000232597.1	AC013727.1.1	lncRNA	chr2:104473427-104496667	ENSG00000207649.1	MIR138-2	miRNA	chr16:56892429-56892513
ENSG00000234829.2	IFNA17	coding	chr9:21227241-21228221	ENSG00000232597.1	AC013727.1.1	lncRNA	chr2:104473427-104496667	ENSG00000207649.1	MIR138-2	miRNA	chr16:56892429-56892513
ENSG00000183632.10	TP53TG3	coding	chr16:32684851-32688053	ENSG00000232597.1	AC013727.1.1	lncRNA	chr2:104473427-104496667	ENSG00000238866.1	MIR548O2	miRNA	chr1:143876890-143876982
ENSG00000183632.10	TP53TG3	coding	chr16:32684851-32688053	ENSG00000232597.1	AC013727.1.1	lncRNA	chr2:104473427-104496667	ENSG00000207820.1	MIR545	miRNA	chrX:73506938-73507044
ENSG00000149133.1	OR5F1	coding	chr11:55761156-55762101	ENSG00000232597.1	AC013727.1.1	lncRNA	chr2:104473427-104496667	ENSG00000207656.1	MIR489	miRNA	chr7:93113247-93113331
ENSG00000149133.1	OR5F1	coding	chr11:55761156-55762101	ENSG00000232597.1	AC013727.1.1	lncRNA	chr2:104473427-104496667	ENSG00000207813.1	MIR605	miRNA	chr10:53059332-53059415
ENSG00000181761.5	OR8H3	coding	chr11:55889848-55890787	ENSG00000232597.1	AC013727.1.1	lncRNA	chr2:104473427-104496667	ENSG00000207633.1	MIR505	miRNA	chrX:139006306-139006390
ENSG00000257198.1	AL589645.1	coding	chr9:34832641-34838583	ENSG00000232597.1	AC013727.1.1	lncRNA	chr2:104473427-104496667	ENSG00000207633.1	MIR505	miRNA	chrX:139006306-139006390
ENSG00000204495.3	PRAMEF13	coding	chr1:13447413-13452656	ENSG00000232597.1	AC013727.1.1	lncRNA	chr2:104473427-104496667	ENSG00000199145.1	MIR302D	miRNA	chr4:113569159-113569227
ENSG00000211862.1	TRAJ27	coding	chr14:22985250-22985309	ENSG00000232597.1	AC013727.1.1	lncRNA	chr2:104473427-104496667	ENSG00000199145.1	MIR302D	miRNA	chr4:113569159-113569227
ENSG00000235718.3	MFRP.1	coding	chr11:119209651-119217383	ENSG00000232597.1	AC013727.1.1	lncRNA	chr2:104473427-104496667	ENSG00000199030.1	MIRLET7C	miRNA	chr21:17912142-17912236
ENSG00000235718.3	MFRP.1	coding	chr11:119209651-119217383	ENSG00000232597.1	AC013727.1.1	lncRNA	chr2:104473427-104496667	ENSG00000199071.2	MIR423	miRNA	chr17:28444096-28444190
ENSG00000153498.7	SPACA7	coding	chr13:113030632-113089003	ENSG00000232597.1	AC013727.1.1	lncRNA	chr2:104473427-104496667	ENSG00000207656.1	MIR489	miRNA	chr7:93113247-93113331
ENSG00000198567.5	AP000552.1	coding	chr22:21645341-21648982	ENSG00000232597.1	AC013727.1.1	lncRNA	chr2:104473427-104496667	ENSG00000207656.1	MIR489	miRNA	chr7:93113247-93113331
ENSG00000186400.3	OR10X1	coding	chr1:158548708-158549689	ENSG00000232597.1	AC013727.1.1	lncRNA	chr2:104473427-104496667	ENSG00000207656.1	MIR489	miRNA	chr7:93113247-93113331
ENSG00000181958.3	OR4A15	coding	chr11:55135359-55136394	ENSG00000232597.1	AC013727.1.1	lncRNA	chr2:104473427-104496667	ENSG00000207656.1	MIR489	miRNA	chr7:93113247-93113331
ENSG00000176134.4	AL445665.1	coding	chr9:69650262-69660358	ENSG00000232597.1	AC013727.1.1	lncRNA	chr2:104473427-104496667	ENSG00000207656.1	MIR489	miRNA	chr7:93113247-93113331
ENSG00000181761.5	OR8H3	coding	chr11:55889848-55890787	ENSG00000232597.1	AC013727.1.1	lncRNA	chr2:104473427-104496667	ENSG00000207656.1	MIR489	miRNA	chr7:93113247-93113331
ENSG00000204495.3	PRAMEF13	coding	chr1:13447413-13452656	ENSG00000232597.1	AC013727.1.1	lncRNA	chr2:104473427-104496667	ENSG00000221522.1	MIR548AC	miRNA	chr4:104343256-104343353
ENSG00000184394.1	OR4N5	coding	chr14:20611894-20612821	ENSG00000232597.1	AC013727.1.1	lncRNA	chr2:104473427-104496667	ENSG00000221522.1	MIR548AC	miRNA	chr4:104343256-104343353
ENSG00000211684.2	IGLJ7	coding	chr22:23263561-23263607	ENSG00000232597.1	AC013727.1.1	lncRNA	chr2:104473427-104496667	ENSG00000221522.1	MIR548AC	miRNA	chr4:104343256-104343353
ENSG00000198567.5	AP000552.1	coding	chr22:21645341-21648982	ENSG00000232597.1	AC013727.1.1	lncRNA	chr2:104473427-104496667	ENSG00000207775.1	MIR548A1	miRNA	chr6:18572014-18572111
ENSG00000186400.3	OR10X1	coding	chr1:158548708-158549689	ENSG00000232597.1	AC013727.1.1	lncRNA	chr2:104473427-104496667	ENSG00000207775.1	MIR548A1	miRNA	chr6:18572014-18572111
ENSG00000184394.1	OR4N5	coding	chr14:20611894-20612821	ENSG00000232597.1	AC013727.1.1	lncRNA	chr2:104473427-104496667	ENSG00000207775.1	MIR548A1	miRNA	chr6:18572014-18572111
ENSG00000257860.1	RP11-552I14.1.1	coding	chr12:103545619-103562087	ENSG00000232597.1	AC013727.1.1	lncRNA	chr2:104473427-104496667	ENSG00000207775.1	MIR548A1	miRNA	chr6:18572014-18572111
ENSG00000181761.5	OR8H3	coding	chr11:55889848-55890787	ENSG00000232597.1	AC013727.1.1	lncRNA	chr2:104473427-104496667	ENSG00000207775.1	MIR548A1	miRNA	chr6:18572014-18572111
ENSG00000211850.1	TRAJ39	coding	chr14:22970584-22970647	ENSG00000232597.1	AC013727.1.1	lncRNA	chr2:104473427-104496667	ENSG00000207775.1	MIR548A1	miRNA	chr6:18572014-18572111
ENSG00000244025.2	KRTAP19-3	coding	chr21:31863781-31864275	ENSG00000232597.1	AC013727.1.1	lncRNA	chr2:104473427-104496667	ENSG00000207775.1	MIR548A1	miRNA	chr6:18572014-18572111
ENSG00000153498.7	SPACA7	coding	chr13:113030632-113089003	ENSG00000232597.1	AC013727.1.1	lncRNA	chr2:104473427-104496667	ENSG00000207784.1	MIR542	miRNA	chrX:133675370-133675467
ENSG00000153498.7	SPACA7	coding	chr13:113030632-113089003	ENSG00000232597.1	AC013727.1.1	lncRNA	chr2:104473427-104496667	ENSG00000207813.1	MIR605	miRNA	chr10:53059332-53059415
ENSG00000228325.2	AC233263.1	coding	chr2:90537798-90538363	ENSG00000232597.1	AC013727.1.1	lncRNA	chr2:104473427-104496667	ENSG00000199102.1	MIR302C	miRNA	chr4:113569518-113569586
ENSG00000253782.1	RP11-350F16.2.1	coding	chr8:47842461-47846068	ENSG00000232597.1	AC013727.1.1	lncRNA	chr2:104473427-104496667	ENSG00000207992.1	MIR519A1	miRNA	chr19:54255650-54255735
ENSG00000211692.1	TRGJP1	coding	chr7:38315859-38315919	ENSG00000232597.1	AC013727.1.1	lncRNA	chr2:104473427-104496667	ENSG00000207626.1	MIR562	miRNA	chr2:233037362-233037457
ENSG00000211692.1	TRGJP1	coding	chr7:38315859-38315919	ENSG00000232597.1	AC013727.1.1	lncRNA	chr2:104473427-104496667	ENSG00000207562.1	MIR34C	miRNA	chr11:111384163-111384240
ENSG00000184394.1	OR4N5	coding	chr14:20611894-20612821	ENSG00000232597.1	AC013727.1.1	lncRNA	chr2:104473427-104496667	ENSG00000207562.1	MIR34C	miRNA	chr11:111384163-111384240
ENSG00000198567.5	AP000552.1	coding	chr22:21645341-21648982	ENSG00000232597.1	AC013727.1.1	lncRNA	chr2:104473427-104496667	ENSG00000207784.1	MIR542	miRNA	chrX:133675370-133675467
ENSG00000198567.5	AP000552.1	coding	chr22:21645341-21648982	ENSG00000232597.1	AC013727.1.1	lncRNA	chr2:104473427-104496667	ENSG00000207813.1	MIR605	miRNA	chr10:53059332-53059415
ENSG00000205330.2	OR6C1	coding	chr12:55714345-55715408	ENSG00000232597.1	AC013727.1.1	lncRNA	chr2:104473427-104496667	ENSG00000199030.1	MIRLET7C	miRNA	chr21:17912142-17912236
ENSG00000186803.3	IFNA10	coding	chr9:21206179-21207142	ENSG00000232597.1	AC013727.1.1	lncRNA	chr2:104473427-104496667	ENSG00000199030.1	MIRLET7C	miRNA	chr21:17912142-17912236
ENSG00000185775.9	FAM75A6	coding	chr9:43624506-43630730	ENSG00000232597.1	AC013727.1.1	lncRNA	chr2:104473427-104496667	ENSG00000199030.1	MIRLET7C	miRNA	chr21:17912142-17912236
ENSG00000187170.4	LCE4A	coding	chr1:152680635-152681967	ENSG00000232597.1	AC013727.1.1	lncRNA	chr2:104473427-104496667	ENSG00000199030.1	MIRLET7C	miRNA	chr21:17912142-17912236
ENSG00000211850.1	TRAJ39	coding	chr14:22970584-22970647	ENSG00000232597.1	AC013727.1.1	lncRNA	chr2:104473427-104496667	ENSG00000199030.1	MIRLET7C	miRNA	chr21:17912142-17912236
ENSG00000211842.1	TRAJ47	coding	chr14:22961837-22961894	ENSG00000232597.1	AC013727.1.1	lncRNA	chr2:104473427-104496667	ENSG00000207580.1	MIR526B	miRNA	chr19:54197646-54197729
ENSG00000176269.3	OR4F21	coding	chr8:116048-117043	ENSG00000232597.1	AC013727.1.1	lncRNA	chr2:104473427-104496667	ENSG00000207992.1	MIR519A1	miRNA	chr19:54255650-54255735
ENSG00000211842.1	TRAJ47	coding	chr14:22961837-22961894	ENSG00000232597.1	AC013727.1.1	lncRNA	chr2:104473427-104496667	ENSG00000207992.1	MIR519A1	miRNA	chr19:54255650-54255735
ENSG00000176134.4	AL445665.1	coding	chr9:69650262-69660358	ENSG00000232597.1	AC013727.1.1	lncRNA	chr2:104473427-104496667	ENSG00000207784.1	MIR542	miRNA	chrX:133675370-133675467
ENSG00000187238.5	LCE3B	coding	chr1:152586286-152586574	ENSG00000232597.1	AC013727.1.1	lncRNA	chr2:104473427-104496667	ENSG00000199102.1	MIR302C	miRNA	chr4:113569518-113569586
ENSG00000187238.5	LCE3B	coding	chr1:152586286-152586574	ENSG00000232597.1	AC013727.1.1	lncRNA	chr2:104473427-104496667	ENSG00000207609.1	MIR491	miRNA	chr9:20716103-20716187
ENSG00000187238.5	LCE3B	coding	chr1:152586286-152586574	ENSG00000232597.1	AC013727.1.1	lncRNA	chr2:104473427-104496667	ENSG00000239070.1	MIR1299	miRNA	chr9:69002238-69002321
ENSG00000187238.5	LCE3B	coding	chr1:152586286-152586574	ENSG00000232597.1	AC013727.1.1	lncRNA	chr2:104473427-104496667	ENSG00000212024.1	MIR550A3	miRNA	chr7:29720348-29720445
ENSG00000186092.4	OR4F5	coding	chr1:69090-70008	ENSG00000232597.1	AC013727.1.1	lncRNA	chr2:104473427-104496667	ENSG00000239070.1	MIR1299	miRNA	chr9:69002238-69002321
ENSG00000186092.4	OR4F5	coding	chr1:69090-70008	ENSG00000232597.1	AC013727.1.1	lncRNA	chr2:104473427-104496667	ENSG00000212024.1	MIR550A3	miRNA	chr7:29720348-29720445
ENSG00000186803.3	IFNA10	coding	chr9:21206179-21207142	ENSG00000232597.1	AC013727.1.1	lncRNA	chr2:104473427-104496667	ENSG00000221296.1	MIR548T	miRNA	chr4:174189304-174189386
ENSG00000186803.3	IFNA10	coding	chr9:21206179-21207142	ENSG00000232597.1	AC013727.1.1	lncRNA	chr2:104473427-104496667	ENSG00000207957.1	MIR105-1	miRNA	chrX:151560690-151560771
ENSG00000186803.3	IFNA10	coding	chr9:21206179-21207142	ENSG00000232597.1	AC013727.1.1	lncRNA	chr2:104473427-104496667	ENSG00000207735.1	MIR520D	miRNA	chr19:54223349-54223436
ENSG00000186803.3	IFNA10	coding	chr9:21206179-21207142	ENSG00000232597.1	AC013727.1.1	lncRNA	chr2:104473427-104496667	ENSG00000208009.1	MIR130A	miRNA	chr11:57408670-57408759
ENSG00000176269.3	OR4F21	coding	chr8:116048-117043	ENSG00000232597.1	AC013727.1.1	lncRNA	chr2:104473427-104496667	ENSG00000207839.1	MIR33B	miRNA	chr17:17717149-17717245
ENSG00000187170.4	LCE4A	coding	chr1:152680635-152681967	ENSG00000232597.1	AC013727.1.1	lncRNA	chr2:104473427-104496667	ENSG00000221296.1	MIR548T	miRNA	chr4:174189304-174189386
ENSG00000187080.7	OR2AK2	coding	chr1:248128534-248129641	ENSG00000232597.1	AC013727.1.1	lncRNA	chr2:104473427-104496667	ENSG00000221296.1	MIR548T	miRNA	chr4:174189304-174189386
ENSG00000204495.3	PRAMEF13	coding	chr1:13447413-13452656	ENSG00000232597.1	AC013727.1.1	lncRNA	chr2:104473427-104496667	ENSG00000199169.1	MIR367	miRNA	chr4:113569029-113569097
ENSG00000185775.9	FAM75A6	coding	chr9:43624506-43630730	ENSG00000232597.1	AC013727.1.1	lncRNA	chr2:104473427-104496667	ENSG00000239070.1	MIR1299	miRNA	chr9:69002238-69002321
ENSG00000182854.5	OR4F15	coding	chr15:102358365-102359350	ENSG00000232597.1	AC013727.1.1	lncRNA	chr2:104473427-104496667	ENSG00000199102.1	MIR302C	miRNA	chr4:113569518-113569586
ENSG00000187170.4	LCE4A	coding	chr1:152680635-152681967	ENSG00000232597.1	AC013727.1.1	lncRNA	chr2:104473427-104496667	ENSG00000207957.1	MIR105-1	miRNA	chrX:151560690-151560771
ENSG00000187170.4	LCE4A	coding	chr1:152680635-152681967	ENSG00000232597.1	AC013727.1.1	lncRNA	chr2:104473427-104496667	ENSG00000207735.1	MIR520D	miRNA	chr19:54223349-54223436
ENSG00000176134.4	AL445665.1	coding	chr9:69650262-69660358	ENSG00000232597.1	AC013727.1.1	lncRNA	chr2:104473427-104496667	ENSG00000207813.1	MIR605	miRNA	chr10:53059332-53059415
ENSG00000176134.4	AL445665.1	coding	chr9:69650262-69660358	ENSG00000232597.1	AC013727.1.1	lncRNA	chr2:104473427-104496667	ENSG00000239070.1	MIR1299	miRNA	chr9:69002238-69002321
ENSG00000184394.1	OR4N5	coding	chr14:20611894-20612821	ENSG00000232597.1	AC013727.1.1	lncRNA	chr2:104473427-104496667	ENSG00000207820.1	MIR545	miRNA	chrX:73506938-73507044
ENSG00000211847.1	TRAJ42	coding	chr14:22965871-22965937	ENSG00000232597.1	AC013727.1.1	lncRNA	chr2:104473427-104496667	ENSG00000199102.1	MIR302C	miRNA	chr4:113569518-113569586
ENSG00000187080.7	OR2AK2	coding	chr1:248128534-248129641	ENSG00000232597.1	AC013727.1.1	lncRNA	chr2:104473427-104496667	ENSG00000199102.1	MIR302C	miRNA	chr4:113569518-113569586
ENSG00000211873.1	TRAJ16	coding	chr14:22997486-22997546	ENSG00000232597.1	AC013727.1.1	lncRNA	chr2:104473427-104496667	ENSG00000199102.1	MIR302C	miRNA	chr4:113569518-113569586
ENSG00000171944.1	OR52A5	coding	chr11:5152921-5153872	ENSG00000232597.1	AC013727.1.1	lncRNA	chr2:104473427-104496667	ENSG00000208009.1	MIR130A	miRNA	chr11:57408670-57408759
ENSG00000205238.5	SPDYE2	coding	chr7:102191678-102202755	ENSG00000232597.1	AC013727.1.1	lncRNA	chr2:104473427-104496667	ENSG00000221273.1	MIR1237	miRNA	chr11:64136073-64136175
ENSG00000196408.7	NOXO1	coding	chr16:2028917-2034193	ENSG00000232597.1	AC013727.1.1	lncRNA	chr2:104473427-104496667	ENSG00000207863.1	MIR125B2	miRNA	chr21:17962556-17962645
ENSG00000240432.2	KRTAP13-3	coding	chr21:31797582-31798286	ENSG00000232597.1	AC013727.1.1	lncRNA	chr2:104473427-104496667	ENSG00000207735.1	MIR520D	miRNA	chr19:54223349-54223436
ENSG00000184032.2	KRTAP20-2	coding	chr21:32007554-32007938	ENSG00000232597.1	AC013727.1.1	lncRNA	chr2:104473427-104496667	ENSG00000207735.1	MIR520D	miRNA	chr19:54223349-54223436
ENSG00000244025.2	KRTAP19-3	coding	chr21:31863781-31864275	ENSG00000232597.1	AC013727.1.1	lncRNA	chr2:104473427-104496667	ENSG00000207735.1	MIR520D	miRNA	chr19:54223349-54223436
ENSG00000211872.1	TRAJ17	coding	chr14:22995811-22995874	ENSG00000232597.1	AC013727.1.1	lncRNA	chr2:104473427-104496667	ENSG00000207583.1	MIR606	miRNA	chr10:77312215-77312311
ENSG00000211684.2	IGLJ7	coding	chr22:23263561-23263607	ENSG00000232597.1	AC013727.1.1	lncRNA	chr2:104473427-104496667	ENSG00000207583.1	MIR606	miRNA	chr10:77312215-77312311
ENSG00000255164.1	RP5-1047A19.4.1	coding	chr8:146218299-146220223	ENSG00000232597.1	AC013727.1.1	lncRNA	chr2:104473427-104496667	ENSG00000212024.1	MIR550A3	miRNA	chr7:29720348-29720445
ENSG00000244025.2	KRTAP19-3	coding	chr21:31863781-31864275	ENSG00000232597.1	AC013727.1.1	lncRNA	chr2:104473427-104496667	ENSG00000207863.1	MIR125B2	miRNA	chr21:17962556-17962645
ENSG00000211842.1	TRAJ47	coding	chr14:22961837-22961894	ENSG00000232597.1	AC013727.1.1	lncRNA	chr2:104473427-104496667	ENSG00000207752.1	MIR199A1	miRNA	chr19:10928101-10928172
ENSG00000181761.5	OR8H3	coding	chr11:55889848-55890787	ENSG00000232597.1	AC013727.1.1	lncRNA	chr2:104473427-104496667	ENSG00000207609.1	MIR491	miRNA	chr9:20716103-20716187
ENSG00000257198.1	AL589645.1	coding	chr9:34832641-34838583	ENSG00000232597.1	AC013727.1.1	lncRNA	chr2:104473427-104496667	ENSG00000207609.1	MIR491	miRNA	chr9:20716103-20716187
ENSG00000221900.3	POM121L12	coding	chr7:53103334-53104617	ENSG00000232597.1	AC013727.1.1	lncRNA	chr2:104473427-104496667	ENSG00000199071.2	MIR423	miRNA	chr17:28444096-28444190
ENSG00000203757.1	OR6K3	coding	chr1:158686957-158687953	ENSG00000232597.1	AC013727.1.1	lncRNA	chr2:104473427-104496667	ENSG00000238866.1	MIR548O2	miRNA	chr1:143876890-143876982
ENSG00000184895.6	SRY	coding	chrY:2654895-2655740	ENSG00000232597.1	AC013727.1.1	lncRNA	chr2:104473427-104496667	ENSG00000212024.1	MIR550A3	miRNA	chr7:29720348-29720445
ENSG00000211842.1	TRAJ47	coding	chr14:22961837-22961894	ENSG00000232597.1	AC013727.1.1	lncRNA	chr2:104473427-104496667	ENSG00000207583.1	MIR606	miRNA	chr10:77312215-77312311
ENSG00000172459.2	OR5AR1	coding	chr11:56431137-56432163	ENSG00000232597.1	AC013727.1.1	lncRNA	chr2:104473427-104496667	ENSG00000199071.2	MIR423	miRNA	chr17:28444096-28444190
ENSG00000049656.9	CLPTM1L	coding	chr5:1317858-1345214	ENSG00000249941.1	CTD-2046I8.1.1	lncRNA	chr5:4866633-4874872	ENSG00000221737.1	MIR548I1	miRNA	chr3:125509246-125509395
ENSG00000206104.2	KRTAP20-3	coding	chr21:32015182-32015455	ENSG00000229118.1	AC068491.2.1	lncRNA	chr2:112022859-112037457	ENSG00000207996.1	MIR301A	miRNA	chr17:57228496-57228582
ENSG00000206104.2	KRTAP20-3	coding	chr21:32015182-32015455	ENSG00000231487.1	AP006285.7.1	lncRNA	chr11:1683813-1684573	ENSG00000207996.1	MIR301A	miRNA	chr17:57228496-57228582
ENSG00000206104.2	KRTAP20-3	coding	chr21:32015182-32015455	ENSG00000254120.1	RP11-705O24.2.1	lncRNA	chr8:62802397-62806765	ENSG00000199156.1	MIR422A	miRNA	chr15:64163128-64163218
ENSG00000206104.2	KRTAP20-3	coding	chr21:32015182-32015455	ENSG00000255427.1	RP11-350D17.2.1	lncRNA	chr11:34592422-34595529	ENSG00000207996.1	MIR301A	miRNA	chr17:57228496-57228582
ENSG00000206104.2	KRTAP20-3	coding	chr21:32015182-32015455	ENSG00000253880.1	RP11-124B13.1.1	lncRNA	chr8:5901874-6115058	ENSG00000207996.1	MIR301A	miRNA	chr17:57228496-57228582
ENSG00000206104.2	KRTAP20-3	coding	chr21:32015182-32015455	ENSG00000224095.1	AC108051.1.1	lncRNA	chr2:103583865-103600887	ENSG00000207996.1	MIR301A	miRNA	chr17:57228496-57228582
ENSG00000206104.2	KRTAP20-3	coding	chr21:32015182-32015455	ENSG00000233145.1	RP11-364B14.1.1	lncRNA	chrX:139099426-139100196	ENSG00000211580.1	MIR769	miRNA	chr19:46522189-46522307
ENSG00000206104.2	KRTAP20-3	coding	chr21:32015182-32015455	ENSG00000230920.1	RP11-527D15.1.1	lncRNA	chr9:9799422-9803784	ENSG00000199156.1	MIR422A	miRNA	chr15:64163128-64163218
ENSG00000206104.2	KRTAP20-3	coding	chr21:32015182-32015455	ENSG00000249071.1	EGFLAM-AS3	lncRNA	chr5:38345445-38346653	ENSG00000199156.1	MIR422A	miRNA	chr15:64163128-64163218
ENSG00000206104.2	KRTAP20-3	coding	chr21:32015182-32015455	ENSG00000250357.1	RP11-503L19.1.1	lncRNA	chr4:149614183-149615475	ENSG00000199156.1	MIR422A	miRNA	chr15:64163128-64163218
ENSG00000206104.2	KRTAP20-3	coding	chr21:32015182-32015455	ENSG00000259111.1	RP11-280K24.1.1	lncRNA	chr14:52217277-52229832	ENSG00000199156.1	MIR422A	miRNA	chr15:64163128-64163218
ENSG00000206104.2	KRTAP20-3	coding	chr21:32015182-32015455	ENSG00000259813.1	RP5-1142A6.5.1	lncRNA	chr16:88762908-88765018	ENSG00000199156.1	MIR422A	miRNA	chr15:64163128-64163218
ENSG00000206104.2	KRTAP20-3	coding	chr21:32015182-32015455	ENSG00000229537.1	RP11-5P4.1.1	lncRNA	chr1:63466167-63478142	ENSG00000211580.1	MIR769	miRNA	chr19:46522189-46522307
ENSG00000206104.2	KRTAP20-3	coding	chr21:32015182-32015455	ENSG00000231422.1	RP11-80K21.3.1	lncRNA	chr10:25401986-25406286	ENSG00000211580.1	MIR769	miRNA	chr19:46522189-46522307
ENSG00000130545.10	CRB3	coding	chr19:6464259-6467225	ENSG00000260127.1	AC009166.6.1	lncRNA	chr16:51115239-51160200	ENSG00000207956.1	MIR579	miRNA	chr5:32394483-32394581
ENSG00000211866.1	TRAJ23	coding	chr14:22989393-22989456	ENSG00000238004.1	AC009227.3.1	lncRNA	chr2:155316368-155317332	ENSG00000199161.1	MIR126	miRNA	chr9:139565053-139565138
ENSG00000211866.1	TRAJ23	coding	chr14:22989393-22989456	ENSG00000233069.1	RP5-930J4.2.1	lncRNA	chr1:21059372-21060445	ENSG00000199161.1	MIR126	miRNA	chr9:139565053-139565138
ENSG00000211866.1	TRAJ23	coding	chr14:22989393-22989456	ENSG00000245482.2	RP11-847H18.2.1	lncRNA	chr12:34175215-34199352	ENSG00000199161.1	MIR126	miRNA	chr9:139565053-139565138
ENSG00000211866.1	TRAJ23	coding	chr14:22989393-22989456	ENSG00000250646.1	RP11-530I17.1.1	lncRNA	chr4:55919226-55958701	ENSG00000199161.1	MIR126	miRNA	chr9:139565053-139565138
ENSG00000211866.1	TRAJ23	coding	chr14:22989393-22989456	ENSG00000256953.1	RP11-6B19.2.1	lncRNA	chr12:15966426-15981208	ENSG00000199161.1	MIR126	miRNA	chr9:139565053-139565138
ENSG00000211866.1	TRAJ23	coding	chr14:22989393-22989456	ENSG00000227206.1	XXbac-BCX196D17.5.3	lncRNA	chr6:29091986-29096685	ENSG00000199161.1	MIR126	miRNA	chr9:139565053-139565138
ENSG00000211866.1	TRAJ23	coding	chr14:22989393-22989456	ENSG00000227126.1	NEGR1-AS1	lncRNA	chr1:71867529-71873407	ENSG00000199161.1	MIR126	miRNA	chr9:139565053-139565138
ENSG00000211866.1	TRAJ23	coding	chr14:22989393-22989456	ENSG00000234113.2	AC008163.4.1	lncRNA	chr7:81157718-81191099	ENSG00000199161.1	MIR126	miRNA	chr9:139565053-139565138
ENSG00000211866.1	TRAJ23	coding	chr14:22989393-22989456	ENSG00000251567.1	RP11-775H9.2.1	lncRNA	chr4:137039829-137316626	ENSG00000199161.1	MIR126	miRNA	chr9:139565053-139565138
ENSG00000211866.1	TRAJ23	coding	chr14:22989393-22989456	ENSG00000256389.1	RP11-606D9.1.1	lncRNA	chr12:17742190-17768397	ENSG00000199161.1	MIR126	miRNA	chr9:139565053-139565138
ENSG00000211866.1	TRAJ23	coding	chr14:22989393-22989456	ENSG00000251567.1	RP11-775H9.2.1	lncRNA	chr4:137039829-137316626	ENSG00000207789.1	MIR26A2	miRNA	chr12:58218391-58218475
ENSG00000211866.1	TRAJ23	coding	chr14:22989393-22989456	ENSG00000227332.1	LINC00419	lncRNA	chr13:19433966-19434882	ENSG00000238682.1	MIR376C	miRNA	chr14:101506016-101506102
ENSG00000211866.1	TRAJ23	coding	chr14:22989393-22989456	ENSG00000225102.1	RP11-456H18.1.1	lncRNA	chr6:11990575-11992245	ENSG00000238682.1	MIR376C	miRNA	chr14:101506016-101506102
ENSG00000211866.1	TRAJ23	coding	chr14:22989393-22989456	ENSG00000234542.1	RP11-282I1.2.1	lncRNA	chr10:125333742-125343283	ENSG00000238682.1	MIR376C	miRNA	chr14:101506016-101506102
ENSG00000183054.6	RGPD6	coding	chr2:111271388-111334762	ENSG00000253948.1	RP11-410L14.2.1	lncRNA	chr8:100008990-100025272	ENSG00000199161.1	MIR126	miRNA	chr9:139565053-139565138
ENSG00000211879.1	TRAJ10	coding	chr14:23002444-23002508	ENSG00000238004.1	AC009227.3.1	lncRNA	chr2:155316368-155317332	ENSG00000199161.1	MIR126	miRNA	chr9:139565053-139565138
ENSG00000211879.1	TRAJ10	coding	chr14:23002444-23002508	ENSG00000229118.1	AC068491.2.1	lncRNA	chr2:112022859-112037457	ENSG00000199161.1	MIR126	miRNA	chr9:139565053-139565138
ENSG00000211879.1	TRAJ10	coding	chr14:23002444-23002508	ENSG00000238277.1	AC068483.1.1	lncRNA	chr2:129821418-129829298	ENSG00000199161.1	MIR126	miRNA	chr9:139565053-139565138
ENSG00000211879.1	TRAJ10	coding	chr14:23002444-23002508	ENSG00000231487.1	AP006285.7.1	lncRNA	chr11:1683813-1684573	ENSG00000199161.1	MIR126	miRNA	chr9:139565053-139565138
ENSG00000211879.1	TRAJ10	coding	chr14:23002444-23002508	ENSG00000251364.2	CTD-2516F10.2.1	lncRNA	chr11:7448496-7533746	ENSG00000199161.1	MIR126	miRNA	chr9:139565053-139565138
ENSG00000211879.1	TRAJ10	coding	chr14:23002444-23002508	ENSG00000234860.1	RP11-547C13.1.1	lncRNA	chr9:102293977-102299206	ENSG00000199161.1	MIR126	miRNA	chr9:139565053-139565138
ENSG00000211879.1	TRAJ10	coding	chr14:23002444-23002508	ENSG00000243583.1	RP4-669B10.3.1	lncRNA	chr7:143651936-143694405	ENSG00000199161.1	MIR126	miRNA	chr9:139565053-139565138
ENSG00000211879.1	TRAJ10	coding	chr14:23002444-23002508	ENSG00000236292.1	RP5-1099E6.3.1	lncRNA	chr1:216367392-216377708	ENSG00000199161.1	MIR126	miRNA	chr9:139565053-139565138
ENSG00000211879.1	TRAJ10	coding	chr14:23002444-23002508	ENSG00000233290.1	RP11-147G16.1.1	lncRNA	chr1:82680903-82726817	ENSG00000199161.1	MIR126	miRNA	chr9:139565053-139565138
ENSG00000211879.1	TRAJ10	coding	chr14:23002444-23002508	ENSG00000236414.1	AC004535.2.1	lncRNA	chr7:10742302-10747033	ENSG00000199161.1	MIR126	miRNA	chr9:139565053-139565138
ENSG00000212935.1	KRTAP10-3	coding	chr21:45977672-45978643	ENSG00000233290.1	RP11-147G16.1.1	lncRNA	chr1:82680903-82726817	ENSG00000199161.1	MIR126	miRNA	chr9:139565053-139565138
ENSG00000211853.1	TRAJ36	coding	chr14:22974095-22974155	ENSG00000227880.1	RP11-46E17.6.1	lncRNA	chr22:27853207-27856021	ENSG00000199161.1	MIR126	miRNA	chr9:139565053-139565138
ENSG00000211853.1	TRAJ36	coding	chr14:22974095-22974155	ENSG00000229118.1	AC068491.2.1	lncRNA	chr2:112022859-112037457	ENSG00000199161.1	MIR126	miRNA	chr9:139565053-139565138
ENSG00000205238.5	SPDYE2	coding	chr7:102191678-102202755	ENSG00000229118.1	AC068491.2.1	lncRNA	chr2:112022859-112037457	ENSG00000199161.1	MIR126	miRNA	chr9:139565053-139565138
ENSG00000211853.1	TRAJ36	coding	chr14:22974095-22974155	ENSG00000238277.1	AC068483.1.1	lncRNA	chr2:129821418-129829298	ENSG00000199161.1	MIR126	miRNA	chr9:139565053-139565138
ENSG00000205238.5	SPDYE2	coding	chr7:102191678-102202755	ENSG00000238277.1	AC068483.1.1	lncRNA	chr2:129821418-129829298	ENSG00000199161.1	MIR126	miRNA	chr9:139565053-139565138
ENSG00000183054.6	RGPD6	coding	chr2:111271388-111334762	ENSG00000238277.1	AC068483.1.1	lncRNA	chr2:129821418-129829298	ENSG00000199161.1	MIR126	miRNA	chr9:139565053-139565138
ENSG00000231068.1	KRTAP21-3	coding	chr21:32090842-32091095	ENSG00000238277.1	AC068483.1.1	lncRNA	chr2:129821418-129829298	ENSG00000199161.1	MIR126	miRNA	chr9:139565053-139565138
ENSG00000211853.1	TRAJ36	coding	chr14:22974095-22974155	ENSG00000231487.1	AP006285.7.1	lncRNA	chr11:1683813-1684573	ENSG00000199161.1	MIR126	miRNA	chr9:139565053-139565138
ENSG00000205238.5	SPDYE2	coding	chr7:102191678-102202755	ENSG00000231487.1	AP006285.7.1	lncRNA	chr11:1683813-1684573	ENSG00000199161.1	MIR126	miRNA	chr9:139565053-139565138
ENSG00000211853.1	TRAJ36	coding	chr14:22974095-22974155	ENSG00000234860.1	RP11-547C13.1.1	lncRNA	chr9:102293977-102299206	ENSG00000199161.1	MIR126	miRNA	chr9:139565053-139565138
ENSG00000211853.1	TRAJ36	coding	chr14:22974095-22974155	ENSG00000228521.2	AC099552.3.1	lncRNA	chr7:154995856-154996899	ENSG00000199161.1	MIR126	miRNA	chr9:139565053-139565138
ENSG00000211853.1	TRAJ36	coding	chr14:22974095-22974155	ENSG00000245482.2	RP11-847H18.2.1	lncRNA	chr12:34175215-34199352	ENSG00000199161.1	MIR126	miRNA	chr9:139565053-139565138
ENSG00000211853.1	TRAJ36	coding	chr14:22974095-22974155	ENSG00000250646.1	RP11-530I17.1.1	lncRNA	chr4:55919226-55958701	ENSG00000199161.1	MIR126	miRNA	chr9:139565053-139565138
ENSG00000233803.4	TSPY4	coding	chrY:9175072-9177893	ENSG00000251364.2	CTD-2516F10.2.1	lncRNA	chr11:7448496-7533746	ENSG00000199161.1	MIR126	miRNA	chr9:139565053-139565138
ENSG00000233803.4	TSPY4	coding	chrY:9175072-9177893	ENSG00000234860.1	RP11-547C13.1.1	lncRNA	chr9:102293977-102299206	ENSG00000199161.1	MIR126	miRNA	chr9:139565053-139565138
ENSG00000205238.5	SPDYE2	coding	chr7:102191678-102202755	ENSG00000225316.1	LINC00350	lncRNA	chr13:20161257-20162490	ENSG00000199161.1	MIR126	miRNA	chr9:139565053-139565138
ENSG00000205238.5	SPDYE2	coding	chr7:102191678-102202755	ENSG00000234860.1	RP11-547C13.1.1	lncRNA	chr9:102293977-102299206	ENSG00000199161.1	MIR126	miRNA	chr9:139565053-139565138
ENSG00000205238.5	SPDYE2	coding	chr7:102191678-102202755	ENSG00000250820.1	RP11-91H12.2.1	lncRNA	chr5:175333941-175385541	ENSG00000199161.1	MIR126	miRNA	chr9:139565053-139565138
ENSG00000205238.5	SPDYE2	coding	chr7:102191678-102202755	ENSG00000256953.1	RP11-6B19.2.1	lncRNA	chr12:15966426-15981208	ENSG00000199161.1	MIR126	miRNA	chr9:139565053-139565138
ENSG00000205238.5	SPDYE2	coding	chr7:102191678-102202755	ENSG00000233290.1	RP11-147G16.1.1	lncRNA	chr1:82680903-82726817	ENSG00000199161.1	MIR126	miRNA	chr9:139565053-139565138
ENSG00000205238.5	SPDYE2	coding	chr7:102191678-102202755	ENSG00000234113.2	AC008163.4.1	lncRNA	chr7:81157718-81191099	ENSG00000199161.1	MIR126	miRNA	chr9:139565053-139565138
ENSG00000205238.5	SPDYE2	coding	chr7:102191678-102202755	ENSG00000251654.2	RP11-192H6.2.1	lncRNA	chr5:25219081-25298721	ENSG00000199161.1	MIR126	miRNA	chr9:139565053-139565138
ENSG00000205238.5	SPDYE2	coding	chr7:102191678-102202755	ENSG00000236466.1	RP11-795J1.1.1	lncRNA	chr6:46459788-46500495	ENSG00000199161.1	MIR126	miRNA	chr9:139565053-139565138
ENSG00000205238.5	SPDYE2	coding	chr7:102191678-102202755	ENSG00000253252.2	RP11-10A14.6.1	lncRNA	chr8:9037760-9040029	ENSG00000199161.1	MIR126	miRNA	chr9:139565053-139565138
ENSG00000205238.5	SPDYE2	coding	chr7:102191678-102202755	ENSG00000236414.1	AC004535.2.1	lncRNA	chr7:10742302-10747033	ENSG00000199161.1	MIR126	miRNA	chr9:139565053-139565138
ENSG00000205238.5	SPDYE2	coding	chr7:102191678-102202755	ENSG00000256389.1	RP11-606D9.1.1	lncRNA	chr12:17742190-17768397	ENSG00000199161.1	MIR126	miRNA	chr9:139565053-139565138
ENSG00000183054.6	RGPD6	coding	chr2:111271388-111334762	ENSG00000234860.1	RP11-547C13.1.1	lncRNA	chr9:102293977-102299206	ENSG00000199161.1	MIR126	miRNA	chr9:139565053-139565138
ENSG00000183054.6	RGPD6	coding	chr2:111271388-111334762	ENSG00000228521.2	AC099552.3.1	lncRNA	chr7:154995856-154996899	ENSG00000199161.1	MIR126	miRNA	chr9:139565053-139565138
ENSG00000205457.6	RP11-1277H1.1.1	coding	chr16:33204155-33264727	ENSG00000256953.1	RP11-6B19.2.1	lncRNA	chr12:15966426-15981208	ENSG00000199161.1	MIR126	miRNA	chr9:139565053-139565138
ENSG00000183054.6	RGPD6	coding	chr2:111271388-111334762	ENSG00000234170.1	RP11-446F3.2.1	lncRNA	chr10:2488446-2489546	ENSG00000199161.1	MIR126	miRNA	chr9:139565053-139565138
ENSG00000174942.1	OR5R1	coding	chr11:56184733-56185708	ENSG00000236414.1	AC004535.2.1	lncRNA	chr7:10742302-10747033	ENSG00000199161.1	MIR126	miRNA	chr9:139565053-139565138
ENSG00000261421.1	RP11-22D3.1.1	coding	chr16:49193418-49195934	ENSG00000232740.1	AC062020.1.1	lncRNA	chr2:123823726-123831057	ENSG00000211578.1	MIR766	miRNA	chrX:118780700-118780811
ENSG00000204645.4	SSX4	coding	chrX:48242862-48252785	ENSG00000253948.1	RP11-410L14.2.1	lncRNA	chr8:100008990-100025272	ENSG00000207974.1	MIR557	miRNA	chr1:168344761-168344859
ENSG00000204645.4	SSX4	coding	chrX:48242862-48252785	ENSG00000253948.1	RP11-410L14.2.1	lncRNA	chr8:100008990-100025272	ENSG00000221091.1	MIR1302-5	miRNA	chr20:49231172-49231322
ENSG00000204645.4	SSX4	coding	chrX:48242862-48252785	ENSG00000253948.1	RP11-410L14.2.1	lncRNA	chr8:100008990-100025272	ENSG00000207746.1	MIR575	miRNA	chr4:83674489-83674583
ENSG00000204645.4	SSX4	coding	chrX:48242862-48252785	ENSG00000253948.1	RP11-410L14.2.1	lncRNA	chr8:100008990-100025272	ENSG00000199130.1	MIR365A	miRNA	chr16:14403141-14403228
ENSG00000204645.4	SSX4	coding	chrX:48242862-48252785	ENSG00000231487.1	AP006285.7.1	lncRNA	chr11:1683813-1684573	ENSG00000207755.1	MIR450A2	miRNA	chrX:133674537-133674637
ENSG00000204645.4	SSX4	coding	chrX:48242862-48252785	ENSG00000226771.1	AP001136.2.1	lncRNA	chr21:22595615-22599150	ENSG00000207755.1	MIR450A2	miRNA	chrX:133674537-133674637
ENSG00000204645.4	SSX4	coding	chrX:48242862-48252785	ENSG00000224970.1	RP11-114L10.2.1	lncRNA	chr7:142573588-142590199	ENSG00000207755.1	MIR450A2	miRNA	chrX:133674537-133674637
ENSG00000204645.4	SSX4	coding	chrX:48242862-48252785	ENSG00000233842.1	AC062031.1.1	lncRNA	chr2:146672657-146688714	ENSG00000207755.1	MIR450A2	miRNA	chrX:133674537-133674637
ENSG00000204645.4	SSX4	coding	chrX:48242862-48252785	ENSG00000261651.1	RP11-899L11.3.1	lncRNA	chr16:87249520-87250058	ENSG00000207755.1	MIR450A2	miRNA	chrX:133674537-133674637
ENSG00000204645.4	SSX4	coding	chrX:48242862-48252785	ENSG00000259320.1	RP11-183E24.2.1	lncRNA	chr15:98665791-98674836	ENSG00000207755.1	MIR450A2	miRNA	chrX:133674537-133674637
ENSG00000204645.4	SSX4	coding	chrX:48242862-48252785	ENSG00000230437.1	RP11-102J14.1.1	lncRNA	chr20:12286260-12297133	ENSG00000207755.1	MIR450A2	miRNA	chrX:133674537-133674637
ENSG00000204645.4	SSX4	coding	chrX:48242862-48252785	ENSG00000255558.1	CTC-497E21.5.1	lncRNA	chr11:13076161-13156386	ENSG00000207755.1	MIR450A2	miRNA	chrX:133674537-133674637
ENSG00000204645.4	SSX4	coding	chrX:48242862-48252785	ENSG00000234440.1	RP11-234G16.2.1	lncRNA	chr10:131702616-131703216	ENSG00000207755.1	MIR450A2	miRNA	chrX:133674537-133674637
ENSG00000204645.4	SSX4	coding	chrX:48242862-48252785	ENSG00000250585.1	CTD-2651L24.1.1	lncRNA	chr5:40260758-40267759	ENSG00000207755.1	MIR450A2	miRNA	chrX:133674537-133674637
ENSG00000204645.4	SSX4	coding	chrX:48242862-48252785	ENSG00000241338.1	RP11-342C24.1.1	lncRNA	chr10:46780489-46790500	ENSG00000207755.1	MIR450A2	miRNA	chrX:133674537-133674637
ENSG00000204645.4	SSX4	coding	chrX:48242862-48252785	ENSG00000234660.1	LINC00440	lncRNA	chr13:89925456-89932494	ENSG00000207755.1	MIR450A2	miRNA	chrX:133674537-133674637
ENSG00000204645.4	SSX4	coding	chrX:48242862-48252785	ENSG00000227599.1	RP4-753D4.2.1	lncRNA	chr20:41597382-41600132	ENSG00000207755.1	MIR450A2	miRNA	chrX:133674537-133674637
ENSG00000204645.4	SSX4	coding	chrX:48242862-48252785	ENSG00000255109.1	CTD-2572N17.1.1	lncRNA	chr11:42204841-42275262	ENSG00000207755.1	MIR450A2	miRNA	chrX:133674537-133674637
ENSG00000204645.4	SSX4	coding	chrX:48242862-48252785	ENSG00000197644.2	AC106870.2.1	lncRNA	chr2:30122462-30130065	ENSG00000207729.1	MIR556	miRNA	chr1:162312335-162312430
ENSG00000204645.4	SSX4	coding	chrX:48242862-48252785	ENSG00000224970.1	RP11-114L10.2.1	lncRNA	chr7:142573588-142590199	ENSG00000207729.1	MIR556	miRNA	chr1:162312335-162312430
ENSG00000204645.4	SSX4	coding	chrX:48242862-48252785	ENSG00000198671.2	RP11-168J19.2.1	lncRNA	chr12:65411247-65413586	ENSG00000207729.1	MIR556	miRNA	chr1:162312335-162312430
ENSG00000204645.4	SSX4	coding	chrX:48242862-48252785	ENSG00000232193.1	AL157359.4.1	lncRNA	chr21:20290251-20308177	ENSG00000207729.1	MIR556	miRNA	chr1:162312335-162312430
ENSG00000204645.4	SSX4	coding	chrX:48242862-48252785	ENSG00000231626.1	AC013402.4.1	lncRNA	chr2:105197278-105198348	ENSG00000207729.1	MIR556	miRNA	chr1:162312335-162312430
ENSG00000204645.4	SSX4	coding	chrX:48242862-48252785	ENSG00000233842.1	AC062031.1.1	lncRNA	chr2:146672657-146688714	ENSG00000207729.1	MIR556	miRNA	chr1:162312335-162312430
ENSG00000204645.4	SSX4	coding	chrX:48242862-48252785	ENSG00000236720.1	RP11-63B19.1.1	lncRNA	chr1:177669658-177679465	ENSG00000207729.1	MIR556	miRNA	chr1:162312335-162312430
ENSG00000204645.4	SSX4	coding	chrX:48242862-48252785	ENSG00000261651.1	RP11-899L11.3.1	lncRNA	chr16:87249520-87250058	ENSG00000207729.1	MIR556	miRNA	chr1:162312335-162312430
ENSG00000204645.4	SSX4	coding	chrX:48242862-48252785	ENSG00000259320.1	RP11-183E24.2.1	lncRNA	chr15:98665791-98674836	ENSG00000207729.1	MIR556	miRNA	chr1:162312335-162312430
ENSG00000204645.4	SSX4	coding	chrX:48242862-48252785	ENSG00000225316.1	LINC00350	lncRNA	chr13:20161257-20162490	ENSG00000207729.1	MIR556	miRNA	chr1:162312335-162312430
ENSG00000204645.4	SSX4	coding	chrX:48242862-48252785	ENSG00000230109.1	RP11-275N1.1.1	lncRNA	chr10:21629161-21661879	ENSG00000207729.1	MIR556	miRNA	chr1:162312335-162312430
ENSG00000204645.4	SSX4	coding	chrX:48242862-48252785	ENSG00000234440.1	RP11-234G16.2.1	lncRNA	chr10:131702616-131703216	ENSG00000207729.1	MIR556	miRNA	chr1:162312335-162312430
ENSG00000204645.4	SSX4	coding	chrX:48242862-48252785	ENSG00000241338.1	RP11-342C24.1.1	lncRNA	chr10:46780489-46790500	ENSG00000207729.1	MIR556	miRNA	chr1:162312335-162312430
ENSG00000204645.4	SSX4	coding	chrX:48242862-48252785	ENSG00000260975.1	RP11-142G1.3.1	lncRNA	chr16:52231923-52261868	ENSG00000207729.1	MIR556	miRNA	chr1:162312335-162312430
ENSG00000204645.4	SSX4	coding	chrX:48242862-48252785	ENSG00000261636.1	CTA-249B10.1.1	lncRNA	chr16:25431134-25435490	ENSG00000207729.1	MIR556	miRNA	chr1:162312335-162312430
ENSG00000204645.4	SSX4	coding	chrX:48242862-48252785	ENSG00000259176.1	RP11-69H14.6.1	lncRNA	chr15:22278009-22413497	ENSG00000207729.1	MIR556	miRNA	chr1:162312335-162312430
ENSG00000204645.4	SSX4	coding	chrX:48242862-48252785	ENSG00000249326.1	CTD-2194D22.4.1	lncRNA	chr5:1887445-1900607	ENSG00000207974.1	MIR557	miRNA	chr1:168344761-168344859
ENSG00000204645.4	SSX4	coding	chrX:48242862-48252785	ENSG00000225316.1	LINC00350	lncRNA	chr13:20161257-20162490	ENSG00000207974.1	MIR557	miRNA	chr1:168344761-168344859
ENSG00000204645.4	SSX4	coding	chrX:48242862-48252785	ENSG00000261636.1	CTA-249B10.1.1	lncRNA	chr16:25431134-25435490	ENSG00000207974.1	MIR557	miRNA	chr1:168344761-168344859
ENSG00000204645.4	SSX4	coding	chrX:48242862-48252785	ENSG00000198671.2	RP11-168J19.2.1	lncRNA	chr12:65411247-65413586	ENSG00000207940.1	MIR567	miRNA	chr3:111831647-111831745
ENSG00000204645.4	SSX4	coding	chrX:48242862-48252785	ENSG00000261636.1	CTA-249B10.1.1	lncRNA	chr16:25431134-25435490	ENSG00000207940.1	MIR567	miRNA	chr3:111831647-111831745
ENSG00000204645.4	SSX4	coding	chrX:48242862-48252785	ENSG00000254819.1	RP11-430L3.1.1	lncRNA	chr11:26307257-26309554	ENSG00000199130.1	MIR365A	miRNA	chr16:14403141-14403228
ENSG00000204645.4	SSX4	coding	chrX:48242862-48252785	ENSG00000197644.2	AC106870.2.1	lncRNA	chr2:30122462-30130065	ENSG00000207723.1	MIR519A2	miRNA	chr19:54265597-54265684
ENSG00000204645.4	SSX4	coding	chrX:48242862-48252785	ENSG00000197644.2	AC106870.2.1	lncRNA	chr2:30122462-30130065	ENSG00000207957.1	MIR105-1	miRNA	chrX:151560690-151560771
ENSG00000204645.4	SSX4	coding	chrX:48242862-48252785	ENSG00000197644.2	AC106870.2.1	lncRNA	chr2:30122462-30130065	ENSG00000199130.1	MIR365A	miRNA	chr16:14403141-14403228
ENSG00000204645.4	SSX4	coding	chrX:48242862-48252785	ENSG00000197644.2	AC106870.2.1	lncRNA	chr2:30122462-30130065	ENSG00000208009.1	MIR130A	miRNA	chr11:57408670-57408759
ENSG00000204645.4	SSX4	coding	chrX:48242862-48252785	ENSG00000231626.1	AC013402.4.1	lncRNA	chr2:105197278-105198348	ENSG00000221739.1	MIR1203	miRNA	chr17:46233788-46233873
ENSG00000204645.4	SSX4	coding	chrX:48242862-48252785	ENSG00000230109.1	RP11-275N1.1.1	lncRNA	chr10:21629161-21661879	ENSG00000221739.1	MIR1203	miRNA	chr17:46233788-46233873
ENSG00000204645.4	SSX4	coding	chrX:48242862-48252785	ENSG00000234440.1	RP11-234G16.2.1	lncRNA	chr10:131702616-131703216	ENSG00000221739.1	MIR1203	miRNA	chr17:46233788-46233873
ENSG00000204645.4	SSX4	coding	chrX:48242862-48252785	ENSG00000254344.1	RP11-258J10.1.1	lncRNA	chr8:34641569-34722316	ENSG00000221739.1	MIR1203	miRNA	chr17:46233788-46233873
ENSG00000204645.4	SSX4	coding	chrX:48242862-48252785	ENSG00000241073.1	RP4-714D9.2.1	lncRNA	chr1:100523545-100550027	ENSG00000221739.1	MIR1203	miRNA	chr17:46233788-46233873
ENSG00000204645.4	SSX4	coding	chrX:48242862-48252785	ENSG00000254262.1	RP11-58O3.2.1	lncRNA	chr8:112754240-112769055	ENSG00000221739.1	MIR1203	miRNA	chr17:46233788-46233873
ENSG00000204645.4	SSX4	coding	chrX:48242862-48252785	ENSG00000257750.1	RP11-295G12.1.1	lncRNA	chr12:74154468-74192507	ENSG00000238866.1	MIR548O2	miRNA	chr1:143876890-143876982
ENSG00000204645.4	SSX4	coding	chrX:48242862-48252785	ENSG00000229118.1	AC068491.2.1	lncRNA	chr2:112022859-112037457	ENSG00000207746.1	MIR575	miRNA	chr4:83674489-83674583
ENSG00000204645.4	SSX4	coding	chrX:48242862-48252785	ENSG00000231487.1	AP006285.7.1	lncRNA	chr11:1683813-1684573	ENSG00000207723.1	MIR519A2	miRNA	chr19:54265597-54265684
ENSG00000204645.4	SSX4	coding	chrX:48242862-48252785	ENSG00000231487.1	AP006285.7.1	lncRNA	chr11:1683813-1684573	ENSG00000207957.1	MIR105-1	miRNA	chrX:151560690-151560771
ENSG00000204645.4	SSX4	coding	chrX:48242862-48252785	ENSG00000231487.1	AP006285.7.1	lncRNA	chr11:1683813-1684573	ENSG00000208009.1	MIR130A	miRNA	chr11:57408670-57408759
ENSG00000204645.4	SSX4	coding	chrX:48242862-48252785	ENSG00000226771.1	AP001136.2.1	lncRNA	chr21:22595615-22599150	ENSG00000207577.1	MIR587	miRNA	chr6:107231999-107232095
ENSG00000204645.4	SSX4	coding	chrX:48242862-48252785	ENSG00000230599.2	AC018495.3.1	lncRNA	chr3:10809148-10813403	ENSG00000199130.1	MIR365A	miRNA	chr16:14403141-14403228
ENSG00000204645.4	SSX4	coding	chrX:48242862-48252785	ENSG00000231626.1	AC013402.4.1	lncRNA	chr2:105197278-105198348	ENSG00000207577.1	MIR587	miRNA	chr6:107231999-107232095
ENSG00000204645.4	SSX4	coding	chrX:48242862-48252785	ENSG00000233842.1	AC062031.1.1	lncRNA	chr2:146672657-146688714	ENSG00000207577.1	MIR587	miRNA	chr6:107231999-107232095
ENSG00000204645.4	SSX4	coding	chrX:48242862-48252785	ENSG00000236720.1	RP11-63B19.1.1	lncRNA	chr1:177669658-177679465	ENSG00000221091.1	MIR1302-5	miRNA	chr20:49231172-49231322
ENSG00000204645.4	SSX4	coding	chrX:48242862-48252785	ENSG00000236720.1	RP11-63B19.1.1	lncRNA	chr1:177669658-177679465	ENSG00000207746.1	MIR575	miRNA	chr4:83674489-83674583
ENSG00000204645.4	SSX4	coding	chrX:48242862-48252785	ENSG00000261651.1	RP11-899L11.3.1	lncRNA	chr16:87249520-87250058	ENSG00000207723.1	MIR519A2	miRNA	chr19:54265597-54265684
ENSG00000204645.4	SSX4	coding	chrX:48242862-48252785	ENSG00000230881.1	RP11-486B10.3.1	lncRNA	chr1:42001113-42001539	ENSG00000207723.1	MIR519A2	miRNA	chr19:54265597-54265684
ENSG00000204645.4	SSX4	coding	chrX:48242862-48252785	ENSG00000230109.1	RP11-275N1.1.1	lncRNA	chr10:21629161-21661879	ENSG00000207577.1	MIR587	miRNA	chr6:107231999-107232095
ENSG00000204645.4	SSX4	coding	chrX:48242862-48252785	ENSG00000233519.1	RP11-177F11.1.1	lncRNA	chr1:240563970-240564423	ENSG00000207577.1	MIR587	miRNA	chr6:107231999-107232095
ENSG00000204645.4	SSX4	coding	chrX:48242862-48252785	ENSG00000241338.1	RP11-342C24.1.1	lncRNA	chr10:46780489-46790500	ENSG00000207577.1	MIR587	miRNA	chr6:107231999-107232095
ENSG00000204645.4	SSX4	coding	chrX:48242862-48252785	ENSG00000260975.1	RP11-142G1.3.1	lncRNA	chr16:52231923-52261868	ENSG00000207577.1	MIR587	miRNA	chr6:107231999-107232095
ENSG00000204645.4	SSX4	coding	chrX:48242862-48252785	ENSG00000261636.1	CTA-249B10.1.1	lncRNA	chr16:25431134-25435490	ENSG00000207577.1	MIR587	miRNA	chr6:107231999-107232095
ENSG00000204645.4	SSX4	coding	chrX:48242862-48252785	ENSG00000255109.1	CTD-2572N17.1.1	lncRNA	chr11:42204841-42275262	ENSG00000207577.1	MIR587	miRNA	chr6:107231999-107232095
ENSG00000204645.4	SSX4	coding	chrX:48242862-48252785	ENSG00000261651.1	RP11-899L11.3.1	lncRNA	chr16:87249520-87250058	ENSG00000238866.1	MIR548O2	miRNA	chr1:143876890-143876982
ENSG00000204645.4	SSX4	coding	chrX:48242862-48252785	ENSG00000226833.1	AC097724.3.1	lncRNA	chr2:28931818-28959071	ENSG00000221091.1	MIR1302-5	miRNA	chr20:49231172-49231322
ENSG00000204645.4	SSX4	coding	chrX:48242862-48252785	ENSG00000235288.1	RP11-70C1.3.1	lncRNA	chr3:42846695-42893920	ENSG00000221091.1	MIR1302-5	miRNA	chr20:49231172-49231322
ENSG00000204645.4	SSX4	coding	chrX:48242862-48252785	ENSG00000225316.1	LINC00350	lncRNA	chr13:20161257-20162490	ENSG00000207746.1	MIR575	miRNA	chr4:83674489-83674583
ENSG00000204645.4	SSX4	coding	chrX:48242862-48252785	ENSG00000233519.1	RP11-177F11.1.1	lncRNA	chr1:240563970-240564423	ENSG00000207746.1	MIR575	miRNA	chr4:83674489-83674583
ENSG00000204645.4	SSX4	coding	chrX:48242862-48252785	ENSG00000235288.1	RP11-70C1.3.1	lncRNA	chr3:42846695-42893920	ENSG00000207746.1	MIR575	miRNA	chr4:83674489-83674583
ENSG00000204645.4	SSX4	coding	chrX:48242862-48252785	ENSG00000241338.1	RP11-342C24.1.1	lncRNA	chr10:46780489-46790500	ENSG00000207746.1	MIR575	miRNA	chr4:83674489-83674583
ENSG00000204645.4	SSX4	coding	chrX:48242862-48252785	ENSG00000255109.1	CTD-2572N17.1.1	lncRNA	chr11:42204841-42275262	ENSG00000207746.1	MIR575	miRNA	chr4:83674489-83674583
ENSG00000204645.4	SSX4	coding	chrX:48242862-48252785	ENSG00000234384.1	RP11-158A8.1.1	lncRNA	chr13:91145540-91187334	ENSG00000199130.1	MIR365A	miRNA	chr16:14403141-14403228
ENSG00000204645.4	SSX4	coding	chrX:48242862-48252785	ENSG00000234660.1	LINC00440	lncRNA	chr13:89925456-89932494	ENSG00000207943.1	MIR634	miRNA	chr17:64783189-64783286
ENSG00000204645.4	SSX4	coding	chrX:48242862-48252785	ENSG00000227306.1	AP006285.6.1	lncRNA	chr11:1709526-1710286	ENSG00000199130.1	MIR365A	miRNA	chr16:14403141-14403228
ENSG00000204645.4	SSX4	coding	chrX:48242862-48252785	ENSG00000250583.1	CTD-2233C11.2.1	lncRNA	chr5:33519720-33522335	ENSG00000199130.1	MIR365A	miRNA	chr16:14403141-14403228
ENSG00000204645.4	SSX4	coding	chrX:48242862-48252785	ENSG00000241881.1	U66059.58.1	lncRNA	chr7:141985578-141988698	ENSG00000199130.1	MIR365A	miRNA	chr16:14403141-14403228
ENSG00000204645.4	SSX4	coding	chrX:48242862-48252785	ENSG00000228011.1	LINC00413	lncRNA	chr13:78236634-78237275	ENSG00000199130.1	MIR365A	miRNA	chr16:14403141-14403228
ENSG00000204645.4	SSX4	coding	chrX:48242862-48252785	ENSG00000254504.1	RP11-167J8.2.1	lncRNA	chr11:71383720-71421627	ENSG00000199130.1	MIR365A	miRNA	chr16:14403141-14403228
ENSG00000204645.4	SSX4	coding	chrX:48242862-48252785	ENSG00000226680.2	RP11-61D3.1.1	lncRNA	chr7:122709302-122743643	ENSG00000199130.1	MIR365A	miRNA	chr16:14403141-14403228
ENSG00000204645.4	SSX4	coding	chrX:48242862-48252785	ENSG00000258312.1	RP11-690J15.1.1	lncRNA	chr12:98506791-98686223	ENSG00000199130.1	MIR365A	miRNA	chr16:14403141-14403228
ENSG00000204645.4	SSX4	coding	chrX:48242862-48252785	ENSG00000254344.1	RP11-258J10.1.1	lncRNA	chr8:34641569-34722316	ENSG00000199130.1	MIR365A	miRNA	chr16:14403141-14403228
ENSG00000204645.4	SSX4	coding	chrX:48242862-48252785	ENSG00000237266.1	AC010729.3.1	lncRNA	chr2:5950772-5952728	ENSG00000199130.1	MIR365A	miRNA	chr16:14403141-14403228
ENSG00000204645.4	SSX4	coding	chrX:48242862-48252785	ENSG00000241073.1	RP4-714D9.2.1	lncRNA	chr1:100523545-100550027	ENSG00000199130.1	MIR365A	miRNA	chr16:14403141-14403228
ENSG00000204645.4	SSX4	coding	chrX:48242862-48252785	ENSG00000227599.1	RP4-753D4.2.1	lncRNA	chr20:41597382-41600132	ENSG00000199130.1	MIR365A	miRNA	chr16:14403141-14403228
ENSG00000204645.4	SSX4	coding	chrX:48242862-48252785	ENSG00000254262.1	RP11-58O3.2.1	lncRNA	chr8:112754240-112769055	ENSG00000199130.1	MIR365A	miRNA	chr16:14403141-14403228
ENSG00000204645.4	SSX4	coding	chrX:48242862-48252785	ENSG00000230881.1	RP11-486B10.3.1	lncRNA	chr1:42001113-42001539	ENSG00000199130.1	MIR365A	miRNA	chr16:14403141-14403228
ENSG00000211885.1	TRAJ4	coding	chr14:23011141-23011204	ENSG00000231774.1	RP11-402P6.11.1	lncRNA	chrX:70980624-70981509	ENSG00000207613.1	MIR181C	miRNA	chr19:13985512-13985622
ENSG00000211885.1	TRAJ4	coding	chr14:23011141-23011204	ENSG00000231774.1	RP11-402P6.11.1	lncRNA	chrX:70980624-70981509	ENSG00000221203.1	MIR1262	miRNA	chr1:68649200-68649293
ENSG00000211885.1	TRAJ4	coding	chr14:23011141-23011204	ENSG00000231774.1	RP11-402P6.11.1	lncRNA	chrX:70980624-70981509	ENSG00000221698.1	MIR548H3	miRNA	chr17:13446845-13446963
ENSG00000211885.1	TRAJ4	coding	chr14:23011141-23011204	ENSG00000258383.1	CTD-2200A16.1.1	lncRNA	chr14:99791135-99798352	ENSG00000251856.1	MIR449C	miRNA	chr5:54468089-54468181
ENSG00000211885.1	TRAJ4	coding	chr14:23011141-23011204	ENSG00000258383.1	CTD-2200A16.1.1	lncRNA	chr14:99791135-99798352	ENSG00000221698.1	MIR548H3	miRNA	chr17:13446845-13446963
ENSG00000211885.1	TRAJ4	coding	chr14:23011141-23011204	ENSG00000261439.1	CTD-2050B12.2.1	lncRNA	chr16:56226525-56228430	ENSG00000211991.1	MIR676	miRNA	chrX:69242699-69242783
ENSG00000211885.1	TRAJ4	coding	chr14:23011141-23011204	ENSG00000236408.1	RP11-476H24.1.1	lncRNA	chr7:154630097-154657193	ENSG00000211991.1	MIR676	miRNA	chrX:69242699-69242783
ENSG00000211885.1	TRAJ4	coding	chr14:23011141-23011204	ENSG00000226113.1	RP11-672F9.1.1	lncRNA	chr10:38536849-38622083	ENSG00000211991.1	MIR676	miRNA	chrX:69242699-69242783
ENSG00000211885.1	TRAJ4	coding	chr14:23011141-23011204	ENSG00000236914.3	RP11-1008C21.2.1	lncRNA	chr15:38361681-38365160	ENSG00000207613.1	MIR181C	miRNA	chr19:13985512-13985622
ENSG00000211885.1	TRAJ4	coding	chr14:23011141-23011204	ENSG00000236914.3	RP11-1008C21.2.1	lncRNA	chr15:38361681-38365160	ENSG00000221203.1	MIR1262	miRNA	chr1:68649200-68649293
ENSG00000211885.1	TRAJ4	coding	chr14:23011141-23011204	ENSG00000236914.3	RP11-1008C21.2.1	lncRNA	chr15:38361681-38365160	ENSG00000221698.1	MIR548H3	miRNA	chr17:13446845-13446963
ENSG00000211885.1	TRAJ4	coding	chr14:23011141-23011204	ENSG00000236894.1	RP11-128B16.3.1	lncRNA	chr10:26866604-26868236	ENSG00000251856.1	MIR449C	miRNA	chr5:54468089-54468181
ENSG00000211885.1	TRAJ4	coding	chr14:23011141-23011204	ENSG00000236894.1	RP11-128B16.3.1	lncRNA	chr10:26866604-26868236	ENSG00000207928.1	MIR632	miRNA	chr17:30677127-30677221
ENSG00000211885.1	TRAJ4	coding	chr14:23011141-23011204	ENSG00000224918.1	AY269186.2.1	lncRNA	chr3:95030-96029	ENSG00000207613.1	MIR181C	miRNA	chr19:13985512-13985622
ENSG00000211885.1	TRAJ4	coding	chr14:23011141-23011204	ENSG00000224918.1	AY269186.2.1	lncRNA	chr3:95030-96029	ENSG00000221698.1	MIR548H3	miRNA	chr17:13446845-13446963
ENSG00000211885.1	TRAJ4	coding	chr14:23011141-23011204	ENSG00000229882.1	RP13-30A9.2.1	lncRNA	chr20:61265123-61267214	ENSG00000207613.1	MIR181C	miRNA	chr19:13985512-13985622
ENSG00000211885.1	TRAJ4	coding	chr14:23011141-23011204	ENSG00000229882.1	RP13-30A9.2.1	lncRNA	chr20:61265123-61267214	ENSG00000221203.1	MIR1262	miRNA	chr1:68649200-68649293
ENSG00000211885.1	TRAJ4	coding	chr14:23011141-23011204	ENSG00000229882.1	RP13-30A9.2.1	lncRNA	chr20:61265123-61267214	ENSG00000221698.1	MIR548H3	miRNA	chr17:13446845-13446963
ENSG00000211885.1	TRAJ4	coding	chr14:23011141-23011204	ENSG00000227090.1	AP000402.3.1	lncRNA	chr21:26258989-26275070	ENSG00000207613.1	MIR181C	miRNA	chr19:13985512-13985622
ENSG00000211885.1	TRAJ4	coding	chr14:23011141-23011204	ENSG00000227090.1	AP000402.3.1	lncRNA	chr21:26258989-26275070	ENSG00000221203.1	MIR1262	miRNA	chr1:68649200-68649293
ENSG00000211885.1	TRAJ4	coding	chr14:23011141-23011204	ENSG00000227090.1	AP000402.3.1	lncRNA	chr21:26258989-26275070	ENSG00000221698.1	MIR548H3	miRNA	chr17:13446845-13446963
ENSG00000211885.1	TRAJ4	coding	chr14:23011141-23011204	ENSG00000237626.1	RP11-406A20.1.1	lncRNA	chr9:92740563-92749768	ENSG00000207613.1	MIR181C	miRNA	chr19:13985512-13985622
ENSG00000211885.1	TRAJ4	coding	chr14:23011141-23011204	ENSG00000237626.1	RP11-406A20.1.1	lncRNA	chr9:92740563-92749768	ENSG00000221203.1	MIR1262	miRNA	chr1:68649200-68649293
ENSG00000211885.1	TRAJ4	coding	chr14:23011141-23011204	ENSG00000237626.1	RP11-406A20.1.1	lncRNA	chr9:92740563-92749768	ENSG00000221698.1	MIR548H3	miRNA	chr17:13446845-13446963
ENSG00000211885.1	TRAJ4	coding	chr14:23011141-23011204	ENSG00000228795.1	RP11-436F21.3.1	lncRNA	chr9:106006007-106015452	ENSG00000207613.1	MIR181C	miRNA	chr19:13985512-13985622
ENSG00000211885.1	TRAJ4	coding	chr14:23011141-23011204	ENSG00000228795.1	RP11-436F21.3.1	lncRNA	chr9:106006007-106015452	ENSG00000221203.1	MIR1262	miRNA	chr1:68649200-68649293
ENSG00000211885.1	TRAJ4	coding	chr14:23011141-23011204	ENSG00000228795.1	RP11-436F21.3.1	lncRNA	chr9:106006007-106015452	ENSG00000221698.1	MIR548H3	miRNA	chr17:13446845-13446963
ENSG00000211885.1	TRAJ4	coding	chr14:23011141-23011204	ENSG00000229379.1	AC006041.1.1	lncRNA	chr7:15880921-15881985	ENSG00000251856.1	MIR449C	miRNA	chr5:54468089-54468181
ENSG00000211885.1	TRAJ4	coding	chr14:23011141-23011204	ENSG00000229379.1	AC006041.1.1	lncRNA	chr7:15880921-15881985	ENSG00000207613.1	MIR181C	miRNA	chr19:13985512-13985622
ENSG00000211885.1	TRAJ4	coding	chr14:23011141-23011204	ENSG00000229379.1	AC006041.1.1	lncRNA	chr7:15880921-15881985	ENSG00000221203.1	MIR1262	miRNA	chr1:68649200-68649293
ENSG00000211885.1	TRAJ4	coding	chr14:23011141-23011204	ENSG00000229379.1	AC006041.1.1	lncRNA	chr7:15880921-15881985	ENSG00000221698.1	MIR548H3	miRNA	chr17:13446845-13446963
ENSG00000211885.1	TRAJ4	coding	chr14:23011141-23011204	ENSG00000255032.1	RP11-45A12.2.1	lncRNA	chr11:44740941-44758242	ENSG00000221203.1	MIR1262	miRNA	chr1:68649200-68649293
ENSG00000211885.1	TRAJ4	coding	chr14:23011141-23011204	ENSG00000255032.1	RP11-45A12.2.1	lncRNA	chr11:44740941-44758242	ENSG00000207928.1	MIR632	miRNA	chr17:30677127-30677221
ENSG00000211885.1	TRAJ4	coding	chr14:23011141-23011204	ENSG00000253403.1	RP11-348M17.2.1	lncRNA	chr5:161114352-161116414	ENSG00000207613.1	MIR181C	miRNA	chr19:13985512-13985622
ENSG00000211885.1	TRAJ4	coding	chr14:23011141-23011204	ENSG00000253403.1	RP11-348M17.2.1	lncRNA	chr5:161114352-161116414	ENSG00000221203.1	MIR1262	miRNA	chr1:68649200-68649293
ENSG00000211885.1	TRAJ4	coding	chr14:23011141-23011204	ENSG00000253403.1	RP11-348M17.2.1	lncRNA	chr5:161114352-161116414	ENSG00000221698.1	MIR548H3	miRNA	chr17:13446845-13446963
ENSG00000211885.1	TRAJ4	coding	chr14:23011141-23011204	ENSG00000254734.1	CTD-3138F19.1.1	lncRNA	chr11:29735455-29903261	ENSG00000221698.1	MIR548H3	miRNA	chr17:13446845-13446963
ENSG00000211885.1	TRAJ4	coding	chr14:23011141-23011204	ENSG00000251649.1	RP11-318I4.1.1	lncRNA	chr4:126991862-126993159	ENSG00000251856.1	MIR449C	miRNA	chr5:54468089-54468181
ENSG00000211885.1	TRAJ4	coding	chr14:23011141-23011204	ENSG00000238192.1	LL22NC03-121E8.4.1	lncRNA	chr22:48535277-48536818	ENSG00000251856.1	MIR449C	miRNA	chr5:54468089-54468181
ENSG00000211885.1	TRAJ4	coding	chr14:23011141-23011204	ENSG00000253551.1	RP11-26M5.2.1	lncRNA	chr8:53106921-53112140	ENSG00000221698.1	MIR548H3	miRNA	chr17:13446845-13446963
ENSG00000211885.1	TRAJ4	coding	chr14:23011141-23011204	ENSG00000254380.1	RP11-317J10.4.1	lncRNA	chr8:86436127-86452740	ENSG00000221698.1	MIR548H3	miRNA	chr17:13446845-13446963
ENSG00000211885.1	TRAJ4	coding	chr14:23011141-23011204	ENSG00000257614.1	RP11-116N8.2.1	lncRNA	chr14:36416761-36419250	ENSG00000207928.1	MIR632	miRNA	chr17:30677127-30677221
ENSG00000211885.1	TRAJ4	coding	chr14:23011141-23011204	ENSG00000226717.1	RP11-87N24.2.1	lncRNA	chr9:10613201-10618218	ENSG00000207928.1	MIR632	miRNA	chr17:30677127-30677221
ENSG00000211885.1	TRAJ4	coding	chr14:23011141-23011204	ENSG00000258829.1	CTD-2243E23.1.1	lncRNA	chr14:79538474-79541110	ENSG00000207613.1	MIR181C	miRNA	chr19:13985512-13985622
ENSG00000211885.1	TRAJ4	coding	chr14:23011141-23011204	ENSG00000236408.1	RP11-476H24.1.1	lncRNA	chr7:154630097-154657193	ENSG00000221203.1	MIR1262	miRNA	chr1:68649200-68649293
ENSG00000211885.1	TRAJ4	coding	chr14:23011141-23011204	ENSG00000251649.1	RP11-318I4.1.1	lncRNA	chr4:126991862-126993159	ENSG00000207928.1	MIR632	miRNA	chr17:30677127-30677221
ENSG00000211885.1	TRAJ4	coding	chr14:23011141-23011204	ENSG00000249290.1	RP11-68L1.2.1	lncRNA	chr3:140168276-140179193	ENSG00000221698.1	MIR548H3	miRNA	chr17:13446845-13446963
ENSG00000211885.1	TRAJ4	coding	chr14:23011141-23011204	ENSG00000257912.1	RP11-248E9.5.1	lncRNA	chr12:88189509-88195805	ENSG00000207928.1	MIR632	miRNA	chr17:30677127-30677221
ENSG00000211885.1	TRAJ4	coding	chr14:23011141-23011204	ENSG00000257940.1	RP11-248E9.6.1	lncRNA	chr12:88210262-88211608	ENSG00000207928.1	MIR632	miRNA	chr17:30677127-30677221
ENSG00000211885.1	TRAJ4	coding	chr14:23011141-23011204	ENSG00000223587.1	AY269186.1.1	lncRNA	chr3:65430-66175	ENSG00000207928.1	MIR632	miRNA	chr17:30677127-30677221
ENSG00000211885.1	TRAJ4	coding	chr14:23011141-23011204	ENSG00000261439.1	CTD-2050B12.2.1	lncRNA	chr16:56226525-56228430	ENSG00000207928.1	MIR632	miRNA	chr17:30677127-30677221
ENSG00000211885.1	TRAJ4	coding	chr14:23011141-23011204	ENSG00000226113.1	RP11-672F9.1.1	lncRNA	chr10:38536849-38622083	ENSG00000207928.1	MIR632	miRNA	chr17:30677127-30677221
ENSG00000211885.1	TRAJ4	coding	chr14:23011141-23011204	ENSG00000224015.1	AC063976.3.1	lncRNA	chr5:131514926-131516821	ENSG00000207928.1	MIR632	miRNA	chr17:30677127-30677221
ENSG00000211885.1	TRAJ4	coding	chr14:23011141-23011204	ENSG00000257395.1	RP11-597A11.2.1	lncRNA	chr14:20149578-20152898	ENSG00000207928.1	MIR632	miRNA	chr17:30677127-30677221
ENSG00000211885.1	TRAJ4	coding	chr14:23011141-23011204	ENSG00000248183.1	RP11-655M19.1.1	lncRNA	chr4:28754424-28754905	ENSG00000207928.1	MIR632	miRNA	chr17:30677127-30677221
ENSG00000157954.9	WIPI2	coding	chr7:5229818-5273457	ENSG00000176728.3	TTTY14	lncRNA	chrY:21034386-21239302	ENSG00000207775.1	MIR548A1	miRNA	chr6:18572014-18572111
ENSG00000157954.9	WIPI2	coding	chr7:5229818-5273457	ENSG00000176728.3	TTTY14	lncRNA	chrY:21034386-21239302	ENSG00000207838.1	MIR517C	miRNA	chr19:54244566-54244661
ENSG00000157954.9	WIPI2	coding	chr7:5229818-5273457	ENSG00000224515.1	RP11-5K23.5.1	lncRNA	chr1:161526079-161526868	ENSG00000207723.1	MIR519A2	miRNA	chr19:54265597-54265684
ENSG00000083307.5	GRHL2	coding	chr8:102504659-102681954	ENSG00000223716.1	RP11-113O24.3.1	lncRNA	chr9:38360423-38376427	ENSG00000221737.1	MIR548I1	miRNA	chr3:125509246-125509395
ENSG00000083307.5	GRHL2	coding	chr8:102504659-102681954	ENSG00000249941.1	CTD-2046I8.1.1	lncRNA	chr5:4866633-4874872	ENSG00000221737.1	MIR548I1	miRNA	chr3:125509246-125509395
ENSG00000083307.5	GRHL2	coding	chr8:102504659-102681954	ENSG00000260201.1	RP11-143N13.2.1	lncRNA	chr16:20592209-20598006	ENSG00000221737.1	MIR548I1	miRNA	chr3:125509246-125509395
ENSG00000083307.5	GRHL2	coding	chr8:102504659-102681954	ENSG00000256597.1	RP11-749H20.4.1	lncRNA	chr12:128366161-128367536	ENSG00000221737.1	MIR548I1	miRNA	chr3:125509246-125509395
ENSG00000083307.5	GRHL2	coding	chr8:102504659-102681954	ENSG00000230686.1	AC067945.2.1	lncRNA	chr2:191882679-191883805	ENSG00000221737.1	MIR548I1	miRNA	chr3:125509246-125509395
ENSG00000147380.6	OPN1MW	coding	chrX:153448106-153461633	ENSG00000253713.1	CTC-264O10.2.1	lncRNA	chr5:166543322-166546590	ENSG00000221739.1	MIR1203	miRNA	chr17:46233788-46233873
ENSG00000211879.1	TRAJ10	coding	chr14:23002444-23002508	ENSG00000253713.1	CTC-264O10.2.1	lncRNA	chr5:166543322-166546590	ENSG00000253030.1	MIR2116	miRNA	chr15:59463381-59463461
ENSG00000211879.1	TRAJ10	coding	chr14:23002444-23002508	ENSG00000253713.1	CTC-264O10.2.1	lncRNA	chr5:166543322-166546590	ENSG00000207992.1	MIR519A1	miRNA	chr19:54255650-54255735
ENSG00000211879.1	TRAJ10	coding	chr14:23002444-23002508	ENSG00000253713.1	CTC-264O10.2.1	lncRNA	chr5:166543322-166546590	ENSG00000207752.1	MIR199A1	miRNA	chr19:10928101-10928172
ENSG00000211879.1	TRAJ10	coding	chr14:23002444-23002508	ENSG00000253713.1	CTC-264O10.2.1	lncRNA	chr5:166543322-166546590	ENSG00000207583.1	MIR606	miRNA	chr10:77312215-77312311
ENSG00000232263.1	KRTAP25-1	coding	chr21:31661462-31661832	ENSG00000253713.1	CTC-264O10.2.1	lncRNA	chr5:166543322-166546590	ENSG00000221739.1	MIR1203	miRNA	chr17:46233788-46233873
ENSG00000255378.1	AC084121.16.1	coding	chr8:7636112-7638935	ENSG00000253713.1	CTC-264O10.2.1	lncRNA	chr5:166543322-166546590	ENSG00000253030.1	MIR2116	miRNA	chr15:59463381-59463461
ENSG00000187170.4	LCE4A	coding	chr1:152680635-152681967	ENSG00000253713.1	CTC-264O10.2.1	lncRNA	chr5:166543322-166546590	ENSG00000253030.1	MIR2116	miRNA	chr15:59463381-59463461
ENSG00000182854.5	OR4F15	coding	chr15:102358365-102359350	ENSG00000253713.1	CTC-264O10.2.1	lncRNA	chr5:166543322-166546590	ENSG00000221739.1	MIR1203	miRNA	chr17:46233788-46233873
ENSG00000187170.4	LCE4A	coding	chr1:152680635-152681967	ENSG00000253713.1	CTC-264O10.2.1	lncRNA	chr5:166543322-166546590	ENSG00000221739.1	MIR1203	miRNA	chr17:46233788-46233873
ENSG00000255378.1	AC084121.16.1	coding	chr8:7636112-7638935	ENSG00000253713.1	CTC-264O10.2.1	lncRNA	chr5:166543322-166546590	ENSG00000207580.1	MIR526B	miRNA	chr19:54197646-54197729
ENSG00000255378.1	AC084121.16.1	coding	chr8:7636112-7638935	ENSG00000253713.1	CTC-264O10.2.1	lncRNA	chr5:166543322-166546590	ENSG00000207992.1	MIR519A1	miRNA	chr19:54255650-54255735
ENSG00000206102.2	KRTAP19-8	coding	chr21:32410477-32410795	ENSG00000253713.1	CTC-264O10.2.1	lncRNA	chr5:166543322-166546590	ENSG00000207992.1	MIR519A1	miRNA	chr19:54255650-54255735
ENSG00000206102.2	KRTAP19-8	coding	chr21:32410477-32410795	ENSG00000253713.1	CTC-264O10.2.1	lncRNA	chr5:166543322-166546590	ENSG00000207549.1	MIR521-2	miRNA	chr19:54219847-54219934
ENSG00000196098.2	OR5K4	coding	chr3:98072697-98073663	ENSG00000253740.1	KB-1083B1.1.1	lncRNA	chr8:101630808-101632221	ENSG00000221739.1	MIR1203	miRNA	chr17:46233788-46233873
ENSG00000196098.2	OR5K4	coding	chr3:98072697-98073663	ENSG00000228391.1	AC011995.3.1	lncRNA	chr2:2874329-2875003	ENSG00000199089.2	MIR202	miRNA	chr10:135061014-135061124
ENSG00000196098.2	OR5K4	coding	chr3:98072697-98073663	ENSG00000226487.1	RP4-749H3.2.1	lncRNA	chr1:20738796-20739746	ENSG00000199089.2	MIR202	miRNA	chr10:135061014-135061124
ENSG00000196098.2	OR5K4	coding	chr3:98072697-98073663	ENSG00000249490.1	CTD-2333M24.1.1	lncRNA	chr5:20612733-20614874	ENSG00000221739.1	MIR1203	miRNA	chr17:46233788-46233873
ENSG00000196098.2	OR5K4	coding	chr3:98072697-98073663	ENSG00000225818.1	AC118653.2.1	lncRNA	chr17:69592478-69593420	ENSG00000221739.1	MIR1203	miRNA	chr17:46233788-46233873
ENSG00000177684.3	DEFB114	coding	chr6:49927961-49931818	ENSG00000253740.1	KB-1083B1.1.1	lncRNA	chr8:101630808-101632221	ENSG00000207656.1	MIR489	miRNA	chr7:93113247-93113331
ENSG00000177684.3	DEFB114	coding	chr6:49927961-49931818	ENSG00000253740.1	KB-1083B1.1.1	lncRNA	chr8:101630808-101632221	ENSG00000207706.1	MIR518F	miRNA	chr19:54203268-54203355
ENSG00000177684.3	DEFB114	coding	chr6:49927961-49931818	ENSG00000241328.1	RP11-331K15.1.1	lncRNA	chr3:86531092-86546146	ENSG00000207656.1	MIR489	miRNA	chr7:93113247-93113331
ENSG00000177684.3	DEFB114	coding	chr6:49927961-49931818	ENSG00000241328.1	RP11-331K15.1.1	lncRNA	chr3:86531092-86546146	ENSG00000221025.1	MIR1250	miRNA	chr17:79106995-79107108
ENSG00000177684.3	DEFB114	coding	chr6:49927961-49931818	ENSG00000176728.3	TTTY14	lncRNA	chrY:21034386-21239302	ENSG00000207656.1	MIR489	miRNA	chr7:93113247-93113331
ENSG00000177684.3	DEFB114	coding	chr6:49927961-49931818	ENSG00000176728.3	TTTY14	lncRNA	chrY:21034386-21239302	ENSG00000207775.1	MIR548A1	miRNA	chr6:18572014-18572111
ENSG00000177684.3	DEFB114	coding	chr6:49927961-49931818	ENSG00000176728.3	TTTY14	lncRNA	chrY:21034386-21239302	ENSG00000207596.1	MIR194-2	miRNA	chr11:64658826-64658911
ENSG00000177684.3	DEFB114	coding	chr6:49927961-49931818	ENSG00000176728.3	TTTY14	lncRNA	chrY:21034386-21239302	ENSG00000207784.1	MIR542	miRNA	chrX:133675370-133675467
ENSG00000177684.3	DEFB114	coding	chr6:49927961-49931818	ENSG00000176728.3	TTTY14	lncRNA	chrY:21034386-21239302	ENSG00000207813.1	MIR605	miRNA	chr10:53059332-53059415
ENSG00000177684.3	DEFB114	coding	chr6:49927961-49931818	ENSG00000176728.3	TTTY14	lncRNA	chrY:21034386-21239302	ENSG00000221628.1	MIR1302-4	miRNA	chr2:208133998-208134148
ENSG00000177684.3	DEFB114	coding	chr6:49927961-49931818	ENSG00000176728.3	TTTY14	lncRNA	chrY:21034386-21239302	ENSG00000207838.1	MIR517C	miRNA	chr19:54244566-54244661
ENSG00000177684.3	DEFB114	coding	chr6:49927961-49931818	ENSG00000233193.1	AC005324.7.1	lncRNA	chr17:15664927-15667083	ENSG00000207611.1	MIR149	miRNA	chr2:241395417-241395506
ENSG00000177684.3	DEFB114	coding	chr6:49927961-49931818	ENSG00000233193.1	AC005324.7.1	lncRNA	chr17:15664927-15667083	ENSG00000207820.1	MIR545	miRNA	chrX:73506938-73507044
ENSG00000177684.3	DEFB114	coding	chr6:49927961-49931818	ENSG00000233193.1	AC005324.7.1	lncRNA	chr17:15664927-15667083	ENSG00000207838.1	MIR517C	miRNA	chr19:54244566-54244661
ENSG00000177684.3	DEFB114	coding	chr6:49927961-49931818	ENSG00000224127.1	RP11-510C10.2.1	lncRNA	chr1:75593514-75598743	ENSG00000207596.1	MIR194-2	miRNA	chr11:64658826-64658911
ENSG00000177684.3	DEFB114	coding	chr6:49927961-49931818	ENSG00000232512.1	AP000233.2.1	lncRNA	chr21:26467334-26475983	ENSG00000207996.1	MIR301A	miRNA	chr17:57228496-57228582
ENSG00000177684.3	DEFB114	coding	chr6:49927961-49931818	ENSG00000259839.1	RP11-491F9.6.1	lncRNA	chr16:49370593-49371256	ENSG00000207656.1	MIR489	miRNA	chr7:93113247-93113331
ENSG00000177684.3	DEFB114	coding	chr6:49927961-49931818	ENSG00000231487.1	AP006285.7.1	lncRNA	chr11:1683813-1684573	ENSG00000207656.1	MIR489	miRNA	chr7:93113247-93113331
ENSG00000177684.3	DEFB114	coding	chr6:49927961-49931818	ENSG00000232985.1	RP11-442O18.1.1	lncRNA	chr10:130757035-130758326	ENSG00000207656.1	MIR489	miRNA	chr7:93113247-93113331
ENSG00000177684.3	DEFB114	coding	chr6:49927961-49931818	ENSG00000249076.1	AC016724.8.1	lncRNA	chr2:113820096-113822959	ENSG00000207656.1	MIR489	miRNA	chr7:93113247-93113331
ENSG00000177684.3	DEFB114	coding	chr6:49927961-49931818	ENSG00000239589.1	RP11-118N24.3.1	lncRNA	chr3:94657015-94871353	ENSG00000207656.1	MIR489	miRNA	chr7:93113247-93113331
ENSG00000177684.3	DEFB114	coding	chr6:49927961-49931818	ENSG00000249490.1	CTD-2333M24.1.1	lncRNA	chr5:20612733-20614874	ENSG00000207656.1	MIR489	miRNA	chr7:93113247-93113331
ENSG00000177684.3	DEFB114	coding	chr6:49927961-49931818	ENSG00000198671.2	RP11-168J19.2.1	lncRNA	chr12:65411247-65413586	ENSG00000207656.1	MIR489	miRNA	chr7:93113247-93113331
ENSG00000177684.3	DEFB114	coding	chr6:49927961-49931818	ENSG00000224515.1	RP11-5K23.5.1	lncRNA	chr1:161526079-161526868	ENSG00000207656.1	MIR489	miRNA	chr7:93113247-93113331
ENSG00000177684.3	DEFB114	coding	chr6:49927961-49931818	ENSG00000230114.1	RP11-141A19.2.1	lncRNA	chr1:49723082-49734957	ENSG00000207656.1	MIR489	miRNA	chr7:93113247-93113331
ENSG00000177684.3	DEFB114	coding	chr6:49927961-49931818	ENSG00000249881.1	CTB-57H20.1.1	lncRNA	chr5:142985192-143208337	ENSG00000207656.1	MIR489	miRNA	chr7:93113247-93113331
ENSG00000177684.3	DEFB114	coding	chr6:49927961-49931818	ENSG00000231428.1	RP11-472K17.1.1	lncRNA	chr13:110705631-110707299	ENSG00000207656.1	MIR489	miRNA	chr7:93113247-93113331
ENSG00000177684.3	DEFB114	coding	chr6:49927961-49931818	ENSG00000232624.1	RP11-478H13.3.1	lncRNA	chr10:29095875-29097148	ENSG00000207656.1	MIR489	miRNA	chr7:93113247-93113331
ENSG00000177684.3	DEFB114	coding	chr6:49927961-49931818	ENSG00000228521.2	AC099552.3.1	lncRNA	chr7:154995856-154996899	ENSG00000207656.1	MIR489	miRNA	chr7:93113247-93113331
ENSG00000177684.3	DEFB114	coding	chr6:49927961-49931818	ENSG00000250865.1	RP11-780O17.1.1	lncRNA	chr4:136713538-136727059	ENSG00000207656.1	MIR489	miRNA	chr7:93113247-93113331
ENSG00000177684.3	DEFB114	coding	chr6:49927961-49931818	ENSG00000255393.1	RP11-736I10.1.1	lncRNA	chr11:59792380-59798550	ENSG00000207656.1	MIR489	miRNA	chr7:93113247-93113331
ENSG00000177684.3	DEFB114	coding	chr6:49927961-49931818	ENSG00000254599.1	RP11-115E19.1.1	lncRNA	chr11:98547120-98554465	ENSG00000207656.1	MIR489	miRNA	chr7:93113247-93113331
ENSG00000177684.3	DEFB114	coding	chr6:49927961-49931818	ENSG00000255169.1	RP11-646J21.3.1	lncRNA	chr11:33826313-33827187	ENSG00000207656.1	MIR489	miRNA	chr7:93113247-93113331
ENSG00000177684.3	DEFB114	coding	chr6:49927961-49931818	ENSG00000253583.1	RP11-573J24.1.1	lncRNA	chr8:64498557-64501966	ENSG00000207656.1	MIR489	miRNA	chr7:93113247-93113331
ENSG00000177684.3	DEFB114	coding	chr6:49927961-49931818	ENSG00000228011.1	LINC00413	lncRNA	chr13:78236634-78237275	ENSG00000207656.1	MIR489	miRNA	chr7:93113247-93113331
ENSG00000177684.3	DEFB114	coding	chr6:49927961-49931818	ENSG00000228999.1	AC068490.1.1	lncRNA	chr2:22167480-22188423	ENSG00000207656.1	MIR489	miRNA	chr7:93113247-93113331
ENSG00000177684.3	DEFB114	coding	chr6:49927961-49931818	ENSG00000260568.1	CTD-2358C21.3.1	lncRNA	chr16:31710996-31711786	ENSG00000207656.1	MIR489	miRNA	chr7:93113247-93113331
ENSG00000177684.3	DEFB114	coding	chr6:49927961-49931818	ENSG00000257164.1	RP11-25I15.2.1	lncRNA	chr12:43040384-43080503	ENSG00000207656.1	MIR489	miRNA	chr7:93113247-93113331
ENSG00000177684.3	DEFB114	coding	chr6:49927961-49931818	ENSG00000229578.1	LINC00358	lncRNA	chr13:62578225-62603681	ENSG00000207656.1	MIR489	miRNA	chr7:93113247-93113331
ENSG00000177684.3	DEFB114	coding	chr6:49927961-49931818	ENSG00000225129.1	RP4-614C15.2.1	lncRNA	chr20:57927249-57932829	ENSG00000207656.1	MIR489	miRNA	chr7:93113247-93113331
ENSG00000177684.3	DEFB114	coding	chr6:49927961-49931818	ENSG00000250150.1	RP11-436A7.1.1	lncRNA	chr4:168228060-168229940	ENSG00000207656.1	MIR489	miRNA	chr7:93113247-93113331
ENSG00000177684.3	DEFB114	coding	chr6:49927961-49931818	ENSG00000238277.1	AC068483.1.1	lncRNA	chr2:129821418-129829298	ENSG00000207729.1	MIR556	miRNA	chr1:162312335-162312430
ENSG00000177684.3	DEFB114	coding	chr6:49927961-49931818	ENSG00000198671.2	RP11-168J19.2.1	lncRNA	chr12:65411247-65413586	ENSG00000207729.1	MIR556	miRNA	chr1:162312335-162312430
ENSG00000177684.3	DEFB114	coding	chr6:49927961-49931818	ENSG00000224932.1	AC107399.2.1	lncRNA	chr4:118235752-118281795	ENSG00000207729.1	MIR556	miRNA	chr1:162312335-162312430
ENSG00000177684.3	DEFB114	coding	chr6:49927961-49931818	ENSG00000259320.1	RP11-183E24.2.1	lncRNA	chr15:98665791-98674836	ENSG00000207729.1	MIR556	miRNA	chr1:162312335-162312430
ENSG00000177684.3	DEFB114	coding	chr6:49927961-49931818	ENSG00000225316.1	LINC00350	lncRNA	chr13:20161257-20162490	ENSG00000207729.1	MIR556	miRNA	chr1:162312335-162312430
ENSG00000177684.3	DEFB114	coding	chr6:49927961-49931818	ENSG00000230363.1	RP4-737A23.3.1	lncRNA	chr1:58343973-58346412	ENSG00000211991.1	MIR676	miRNA	chrX:69242699-69242783
ENSG00000177684.3	DEFB114	coding	chr6:49927961-49931818	ENSG00000236378.1	RP11-394G3.2.1	lncRNA	chr6:136128285-136129604	ENSG00000211991.1	MIR676	miRNA	chrX:69242699-69242783
ENSG00000177684.3	DEFB114	coding	chr6:49927961-49931818	ENSG00000238277.1	AC068483.1.1	lncRNA	chr2:129821418-129829298	ENSG00000211991.1	MIR676	miRNA	chrX:69242699-69242783
ENSG00000177684.3	DEFB114	coding	chr6:49927961-49931818	ENSG00000238185.1	RP11-252M21.6.1	lncRNA	chr13:31547425-31551760	ENSG00000211991.1	MIR676	miRNA	chrX:69242699-69242783
ENSG00000177684.3	DEFB114	coding	chr6:49927961-49931818	ENSG00000258507.1	RP13-582L3.4.1	lncRNA	chr4:8860440-8862553	ENSG00000211991.1	MIR676	miRNA	chrX:69242699-69242783
ENSG00000177684.3	DEFB114	coding	chr6:49927961-49931818	ENSG00000224932.1	AC107399.2.1	lncRNA	chr4:118235752-118281795	ENSG00000211991.1	MIR676	miRNA	chrX:69242699-69242783
ENSG00000177684.3	DEFB114	coding	chr6:49927961-49931818	ENSG00000232971.1	RP11-293A10.3.1	lncRNA	chr1:109276877-109278894	ENSG00000211991.1	MIR676	miRNA	chrX:69242699-69242783
ENSG00000177684.3	DEFB114	coding	chr6:49927961-49931818	ENSG00000237736.1	U82670.4.1	lncRNA	chrX:152435329-152439737	ENSG00000211991.1	MIR676	miRNA	chrX:69242699-69242783
ENSG00000177684.3	DEFB114	coding	chr6:49927961-49931818	ENSG00000227332.1	LINC00419	lncRNA	chr13:19433966-19434882	ENSG00000211991.1	MIR676	miRNA	chrX:69242699-69242783
ENSG00000177684.3	DEFB114	coding	chr6:49927961-49931818	ENSG00000231557.1	AC018717.1.1	lncRNA	chr2:199747296-199936514	ENSG00000211991.1	MIR676	miRNA	chrX:69242699-69242783
ENSG00000177684.3	DEFB114	coding	chr6:49927961-49931818	ENSG00000231815.1	AC007179.1.1	lncRNA	chr2:59662347-59669396	ENSG00000211991.1	MIR676	miRNA	chrX:69242699-69242783
ENSG00000177684.3	DEFB114	coding	chr6:49927961-49931818	ENSG00000258107.1	RP11-260G13.1.1	lncRNA	chr14:29859551-29905618	ENSG00000211991.1	MIR676	miRNA	chrX:69242699-69242783
ENSG00000177684.3	DEFB114	coding	chr6:49927961-49931818	ENSG00000233074.1	RP11-327I22.6.1	lncRNA	chr9:43140536-43142739	ENSG00000221522.1	MIR548AC	miRNA	chr4:104343256-104343353
ENSG00000177684.3	DEFB114	coding	chr6:49927961-49931818	ENSG00000198671.2	RP11-168J19.2.1	lncRNA	chr12:65411247-65413586	ENSG00000221522.1	MIR548AC	miRNA	chr4:104343256-104343353
ENSG00000177684.3	DEFB114	coding	chr6:49927961-49931818	ENSG00000250583.1	CTD-2233C11.2.1	lncRNA	chr5:33519720-33522335	ENSG00000221522.1	MIR548AC	miRNA	chr4:104343256-104343353
ENSG00000177684.3	DEFB114	coding	chr6:49927961-49931818	ENSG00000170590.4	LINC00266-3	lncRNA	chr6:131909-144885	ENSG00000207775.1	MIR548A1	miRNA	chr6:18572014-18572111
ENSG00000177684.3	DEFB114	coding	chr6:49927961-49931818	ENSG00000227223.1	RP11-23O13.1.1	lncRNA	chr20:20702316-20703034	ENSG00000199082.1	MIR342	miRNA	chr14:100575991-100576090
ENSG00000177684.3	DEFB114	coding	chr6:49927961-49931818	ENSG00000257523.1	CTD-2384A14.2.1	lncRNA	chr14:29445041-29448130	ENSG00000207813.1	MIR605	miRNA	chr10:53059332-53059415
ENSG00000177684.3	DEFB114	coding	chr6:49927961-49931818	ENSG00000257523.1	CTD-2384A14.2.1	lncRNA	chr14:29445041-29448130	ENSG00000208017.1	MIR140	miRNA	chr16:69966983-69967083
ENSG00000177684.3	DEFB114	coding	chr6:49927961-49931818	ENSG00000223880.1	RP11-159J2.2.1	lncRNA	chr13:75824615-75826148	ENSG00000207596.1	MIR194-2	miRNA	chr11:64658826-64658911
ENSG00000177684.3	DEFB114	coding	chr6:49927961-49931818	ENSG00000223880.1	RP11-159J2.2.1	lncRNA	chr13:75824615-75826148	ENSG00000207732.1	MIR218-1	miRNA	chr4:20529897-20530007
ENSG00000177684.3	DEFB114	coding	chr6:49927961-49931818	ENSG00000253427.1	RP11-103H7.1.1	lncRNA	chr8:127486433-127504841	ENSG00000221203.1	MIR1262	miRNA	chr1:68649200-68649293
ENSG00000177684.3	DEFB114	coding	chr6:49927961-49931818	ENSG00000253427.1	RP11-103H7.1.1	lncRNA	chr8:127486433-127504841	ENSG00000198997.1	MIR107	miRNA	chr10:91352499-91352586
ENSG00000177684.3	DEFB114	coding	chr6:49927961-49931818	ENSG00000230363.1	RP4-737A23.3.1	lncRNA	chr1:58343973-58346412	ENSG00000207596.1	MIR194-2	miRNA	chr11:64658826-64658911
ENSG00000177684.3	DEFB114	coding	chr6:49927961-49931818	ENSG00000230363.1	RP4-737A23.3.1	lncRNA	chr1:58343973-58346412	ENSG00000199082.1	MIR342	miRNA	chr14:100575991-100576090
ENSG00000177684.3	DEFB114	coding	chr6:49927961-49931818	ENSG00000230363.1	RP4-737A23.3.1	lncRNA	chr1:58343973-58346412	ENSG00000198997.1	MIR107	miRNA	chr10:91352499-91352586
ENSG00000177684.3	DEFB114	coding	chr6:49927961-49931818	ENSG00000230363.1	RP4-737A23.3.1	lncRNA	chr1:58343973-58346412	ENSG00000207629.1	MIR526A1	miRNA	chr19:54209505-54209590
ENSG00000177684.3	DEFB114	coding	chr6:49927961-49931818	ENSG00000237626.1	RP11-406A20.1.1	lncRNA	chr9:92740563-92749768	ENSG00000207596.1	MIR194-2	miRNA	chr11:64658826-64658911
ENSG00000177684.3	DEFB114	coding	chr6:49927961-49931818	ENSG00000237626.1	RP11-406A20.1.1	lncRNA	chr9:92740563-92749768	ENSG00000221203.1	MIR1262	miRNA	chr1:68649200-68649293
ENSG00000177684.3	DEFB114	coding	chr6:49927961-49931818	ENSG00000237626.1	RP11-406A20.1.1	lncRNA	chr9:92740563-92749768	ENSG00000211538.1	MIR501	miRNA	chrX:49774329-49774413
ENSG00000177684.3	DEFB114	coding	chr6:49927961-49931818	ENSG00000237626.1	RP11-406A20.1.1	lncRNA	chr9:92740563-92749768	ENSG00000207629.1	MIR526A1	miRNA	chr19:54209505-54209590
ENSG00000177684.3	DEFB114	coding	chr6:49927961-49931818	ENSG00000238004.1	AC009227.3.1	lncRNA	chr2:155316368-155317332	ENSG00000207996.1	MIR301A	miRNA	chr17:57228496-57228582
ENSG00000177684.3	DEFB114	coding	chr6:49927961-49931818	ENSG00000238004.1	AC009227.3.1	lncRNA	chr2:155316368-155317332	ENSG00000198997.1	MIR107	miRNA	chr10:91352499-91352586
ENSG00000177684.3	DEFB114	coding	chr6:49927961-49931818	ENSG00000259839.1	RP11-491F9.6.1	lncRNA	chr16:49370593-49371256	ENSG00000207771.1	MIR550A1	miRNA	chr7:30329409-30329506
ENSG00000177684.3	DEFB114	coding	chr6:49927961-49931818	ENSG00000224211.1	RP11-536D16.2.1	lncRNA	chr9:16121130-16122432	ENSG00000221203.1	MIR1262	miRNA	chr1:68649200-68649293
ENSG00000177684.3	DEFB114	coding	chr6:49927961-49931818	ENSG00000224247.1	AJ009632.3.1	lncRNA	chr21:16866250-16868443	ENSG00000207629.1	MIR526A1	miRNA	chr19:54209505-54209590
ENSG00000177684.3	DEFB114	coding	chr6:49927961-49931818	ENSG00000236378.1	RP11-394G3.2.1	lncRNA	chr6:136128285-136129604	ENSG00000207723.1	MIR519A2	miRNA	chr19:54265597-54265684
ENSG00000177684.3	DEFB114	coding	chr6:49927961-49931818	ENSG00000238277.1	AC068483.1.1	lncRNA	chr2:129821418-129829298	ENSG00000207723.1	MIR519A2	miRNA	chr19:54265597-54265684
ENSG00000177684.3	DEFB114	coding	chr6:49927961-49931818	ENSG00000238277.1	AC068483.1.1	lncRNA	chr2:129821418-129829298	ENSG00000238682.1	MIR376C	miRNA	chr14:101506016-101506102
ENSG00000177684.3	DEFB114	coding	chr6:49927961-49931818	ENSG00000238277.1	AC068483.1.1	lncRNA	chr2:129821418-129829298	ENSG00000208009.1	MIR130A	miRNA	chr11:57408670-57408759
ENSG00000177684.3	DEFB114	coding	chr6:49927961-49931818	ENSG00000238277.1	AC068483.1.1	lncRNA	chr2:129821418-129829298	ENSG00000207820.1	MIR545	miRNA	chrX:73506938-73507044
ENSG00000177684.3	DEFB114	coding	chr6:49927961-49931818	ENSG00000231487.1	AP006285.7.1	lncRNA	chr11:1683813-1684573	ENSG00000207996.1	MIR301A	miRNA	chr17:57228496-57228582
ENSG00000177684.3	DEFB114	coding	chr6:49927961-49931818	ENSG00000231487.1	AP006285.7.1	lncRNA	chr11:1683813-1684573	ENSG00000207723.1	MIR519A2	miRNA	chr19:54265597-54265684
ENSG00000177684.3	DEFB114	coding	chr6:49927961-49931818	ENSG00000231487.1	AP006285.7.1	lncRNA	chr11:1683813-1684573	ENSG00000221628.1	MIR1302-4	miRNA	chr2:208133998-208134148
ENSG00000177684.3	DEFB114	coding	chr6:49927961-49931818	ENSG00000231487.1	AP006285.7.1	lncRNA	chr11:1683813-1684573	ENSG00000221025.1	MIR1250	miRNA	chr17:79106995-79107108
ENSG00000177684.3	DEFB114	coding	chr6:49927961-49931818	ENSG00000231487.1	AP006285.7.1	lncRNA	chr11:1683813-1684573	ENSG00000208009.1	MIR130A	miRNA	chr11:57408670-57408759
ENSG00000177684.3	DEFB114	coding	chr6:49927961-49931818	ENSG00000231487.1	AP006285.7.1	lncRNA	chr11:1683813-1684573	ENSG00000207838.1	MIR517C	miRNA	chr19:54244566-54244661
ENSG00000177684.3	DEFB114	coding	chr6:49927961-49931818	ENSG00000235610.1	AC013448.2.1	lncRNA	chr2:224370193-224375651	ENSG00000207596.1	MIR194-2	miRNA	chr11:64658826-64658911
ENSG00000177684.3	DEFB114	coding	chr6:49927961-49931818	ENSG00000225316.1	LINC00350	lncRNA	chr13:20161257-20162490	ENSG00000207596.1	MIR194-2	miRNA	chr11:64658826-64658911
ENSG00000177684.3	DEFB114	coding	chr6:49927961-49931818	ENSG00000231585.1	AC034228.2.1	lncRNA	chr5:131347140-131348892	ENSG00000207596.1	MIR194-2	miRNA	chr11:64658826-64658911
ENSG00000177684.3	DEFB114	coding	chr6:49927961-49931818	ENSG00000228521.2	AC099552.3.1	lncRNA	chr7:154995856-154996899	ENSG00000207596.1	MIR194-2	miRNA	chr11:64658826-64658911
ENSG00000177684.3	DEFB114	coding	chr6:49927961-49931818	ENSG00000240842.1	RP11-62G11.2.1	lncRNA	chr3:69613256-69620273	ENSG00000207596.1	MIR194-2	miRNA	chr11:64658826-64658911
ENSG00000177684.3	DEFB114	coding	chr6:49927961-49931818	ENSG00000256071.1	RP11-465L8.1.1	lncRNA	chr12:118327258-118328813	ENSG00000207596.1	MIR194-2	miRNA	chr11:64658826-64658911
ENSG00000177684.3	DEFB114	coding	chr6:49927961-49931818	ENSG00000232505.1	XXbac-BPG308J9.3.4	lncRNA	chr6:29191749-29234862	ENSG00000207596.1	MIR194-2	miRNA	chr11:64658826-64658911
ENSG00000177684.3	DEFB114	coding	chr6:49927961-49931818	ENSG00000237479.1	AC007557.2.1	lncRNA	chr2:217731054-217732536	ENSG00000207596.1	MIR194-2	miRNA	chr11:64658826-64658911
ENSG00000177684.3	DEFB114	coding	chr6:49927961-49931818	ENSG00000255109.1	CTD-2572N17.1.1	lncRNA	chr11:42204841-42275262	ENSG00000207596.1	MIR194-2	miRNA	chr11:64658826-64658911
ENSG00000177684.3	DEFB114	coding	chr6:49927961-49931818	ENSG00000241792.1	RP11-501O2.1.1	lncRNA	chr3:147810961-147845020	ENSG00000207706.1	MIR518F	miRNA	chr19:54203268-54203355
ENSG00000177684.3	DEFB114	coding	chr6:49927961-49931818	ENSG00000240354.1	RP11-774I5.1.1	lncRNA	chr3:161534696-161539696	ENSG00000198997.1	MIR107	miRNA	chr10:91352499-91352586
ENSG00000177684.3	DEFB114	coding	chr6:49927961-49931818	ENSG00000234540.1	RP3-448I9.1.1	lncRNA	chr6:14394556-14404520	ENSG00000207952.1	MIR624	miRNA	chr14:31483851-31483948
ENSG00000177684.3	DEFB114	coding	chr6:49927961-49931818	ENSG00000225316.1	LINC00350	lncRNA	chr13:20161257-20162490	ENSG00000207784.1	MIR542	miRNA	chrX:133675370-133675467
ENSG00000177684.3	DEFB114	coding	chr6:49927961-49931818	ENSG00000231189.1	AC013448.1.1	lncRNA	chr2:224363490-224369329	ENSG00000207629.1	MIR526A1	miRNA	chr19:54209505-54209590
ENSG00000177684.3	DEFB114	coding	chr6:49927961-49931818	ENSG00000239395.1	RP11-634B7.5.1	lncRNA	chr1:247875114-247887066	ENSG00000208017.1	MIR140	miRNA	chr16:69966983-69967083
ENSG00000177684.3	DEFB114	coding	chr6:49927961-49931818	ENSG00000254734.1	CTD-3138F19.1.1	lncRNA	chr11:29735455-29903261	ENSG00000207813.1	MIR605	miRNA	chr10:53059332-53059415
ENSG00000177684.3	DEFB114	coding	chr6:49927961-49931818	ENSG00000254734.1	CTD-3138F19.1.1	lncRNA	chr11:29735455-29903261	ENSG00000208017.1	MIR140	miRNA	chr16:69966983-69967083
ENSG00000177684.3	DEFB114	coding	chr6:49927961-49931818	ENSG00000258507.1	RP13-582L3.4.1	lncRNA	chr4:8860440-8862553	ENSG00000207732.1	MIR218-1	miRNA	chr4:20529897-20530007
ENSG00000177684.3	DEFB114	coding	chr6:49927961-49931818	ENSG00000254120.1	RP11-705O24.2.1	lncRNA	chr8:62802397-62806765	ENSG00000221025.1	MIR1250	miRNA	chr17:79106995-79107108
ENSG00000177684.3	DEFB114	coding	chr6:49927961-49931818	ENSG00000254120.1	RP11-705O24.2.1	lncRNA	chr8:62802397-62806765	ENSG00000238682.1	MIR376C	miRNA	chr14:101506016-101506102
ENSG00000177684.3	DEFB114	coding	chr6:49927961-49931818	ENSG00000258662.1	RP11-588P7.2.1	lncRNA	chr14:79713010-79715366	ENSG00000207996.1	MIR301A	miRNA	chr17:57228496-57228582
ENSG00000177684.3	DEFB114	coding	chr6:49927961-49931818	ENSG00000233605.1	AC073628.1.1	lncRNA	chr2:78143059-78145135	ENSG00000207706.1	MIR518F	miRNA	chr19:54203268-54203355
ENSG00000177684.3	DEFB114	coding	chr6:49927961-49931818	ENSG00000255411.1	RP11-98J9.1.1	lncRNA	chr11:13806936-13869549	ENSG00000199082.1	MIR342	miRNA	chr14:100575991-100576090
ENSG00000177684.3	DEFB114	coding	chr6:49927961-49931818	ENSG00000259331.1	RP11-57P19.1.1	lncRNA	chr15:95143242-95144050	ENSG00000199082.1	MIR342	miRNA	chr14:100575991-100576090
ENSG00000177684.3	DEFB114	coding	chr6:49927961-49931818	ENSG00000255169.1	RP11-646J21.3.1	lncRNA	chr11:33826313-33827187	ENSG00000199082.1	MIR342	miRNA	chr14:100575991-100576090
ENSG00000177684.3	DEFB114	coding	chr6:49927961-49931818	ENSG00000224932.1	AC107399.2.1	lncRNA	chr4:118235752-118281795	ENSG00000207723.1	MIR519A2	miRNA	chr19:54265597-54265684
ENSG00000177684.3	DEFB114	coding	chr6:49927961-49931818	ENSG00000233082.1	AC073094.4.1	lncRNA	chr7:1306988-1308903	ENSG00000207952.1	MIR624	miRNA	chr14:31483851-31483948
ENSG00000177684.3	DEFB114	coding	chr6:49927961-49931818	ENSG00000233082.1	AC073094.4.1	lncRNA	chr7:1306988-1308903	ENSG00000211538.1	MIR501	miRNA	chrX:49774329-49774413
ENSG00000177684.3	DEFB114	coding	chr6:49927961-49931818	ENSG00000229779.1	AC016751.2.1	lncRNA	chr2:176769098-176770230	ENSG00000207732.1	MIR218-1	miRNA	chr4:20529897-20530007
ENSG00000177684.3	DEFB114	coding	chr6:49927961-49931818	ENSG00000224515.1	RP11-5K23.5.1	lncRNA	chr1:161526079-161526868	ENSG00000207723.1	MIR519A2	miRNA	chr19:54265597-54265684
ENSG00000177684.3	DEFB114	coding	chr6:49927961-49931818	ENSG00000231428.1	RP11-472K17.1.1	lncRNA	chr13:110705631-110707299	ENSG00000207996.1	MIR301A	miRNA	chr17:57228496-57228582
ENSG00000177684.3	DEFB114	coding	chr6:49927961-49931818	ENSG00000227332.1	LINC00419	lncRNA	chr13:19433966-19434882	ENSG00000207996.1	MIR301A	miRNA	chr17:57228496-57228582
ENSG00000177684.3	DEFB114	coding	chr6:49927961-49931818	ENSG00000240842.1	RP11-62G11.2.1	lncRNA	chr3:69613256-69620273	ENSG00000207996.1	MIR301A	miRNA	chr17:57228496-57228582
ENSG00000177684.3	DEFB114	coding	chr6:49927961-49931818	ENSG00000259107.1	CTD-2128A3.1.1	lncRNA	chr14:85860222-85886418	ENSG00000207996.1	MIR301A	miRNA	chr17:57228496-57228582
ENSG00000177684.3	DEFB114	coding	chr6:49927961-49931818	ENSG00000228521.2	AC099552.3.1	lncRNA	chr7:154995856-154996899	ENSG00000207723.1	MIR519A2	miRNA	chr19:54265597-54265684
ENSG00000177684.3	DEFB114	coding	chr6:49927961-49931818	ENSG00000227332.1	LINC00419	lncRNA	chr13:19433966-19434882	ENSG00000207723.1	MIR519A2	miRNA	chr19:54265597-54265684
ENSG00000177684.3	DEFB114	coding	chr6:49927961-49931818	ENSG00000254434.1	CTD-2555I5.1.1	lncRNA	chr11:80032663-80038955	ENSG00000211538.1	MIR501	miRNA	chrX:49774329-49774413
ENSG00000177684.3	DEFB114	coding	chr6:49927961-49931818	ENSG00000254434.1	CTD-2555I5.1.1	lncRNA	chr11:80032663-80038955	ENSG00000207629.1	MIR526A1	miRNA	chr19:54209505-54209590
ENSG00000177684.3	DEFB114	coding	chr6:49927961-49931818	ENSG00000248029.2	CTD-2313F11.3.1	lncRNA	chr5:54359006-54362058	ENSG00000198997.1	MIR107	miRNA	chr10:91352499-91352586
ENSG00000177684.3	DEFB114	coding	chr6:49927961-49931818	ENSG00000170590.4	LINC00266-3	lncRNA	chr6:131909-144885	ENSG00000207732.1	MIR218-1	miRNA	chr4:20529897-20530007
ENSG00000177684.3	DEFB114	coding	chr6:49927961-49931818	ENSG00000170590.4	LINC00266-3	lncRNA	chr6:131909-144885	ENSG00000207611.1	MIR149	miRNA	chr2:241395417-241395506
ENSG00000177684.3	DEFB114	coding	chr6:49927961-49931818	ENSG00000170590.4	LINC00266-3	lncRNA	chr6:131909-144885	ENSG00000198997.1	MIR107	miRNA	chr10:91352499-91352586
ENSG00000177684.3	DEFB114	coding	chr6:49927961-49931818	ENSG00000170590.4	LINC00266-3	lncRNA	chr6:131909-144885	ENSG00000207838.1	MIR517C	miRNA	chr19:54244566-54244661
ENSG00000177684.3	DEFB114	coding	chr6:49927961-49931818	ENSG00000255323.1	CTD-2140G10.1.1	lncRNA	chr11:22467233-22513565	ENSG00000207732.1	MIR218-1	miRNA	chr4:20529897-20530007
ENSG00000177684.3	DEFB114	coding	chr6:49927961-49931818	ENSG00000255323.1	CTD-2140G10.1.1	lncRNA	chr11:22467233-22513565	ENSG00000208009.1	MIR130A	miRNA	chr11:57408670-57408759
ENSG00000177684.3	DEFB114	coding	chr6:49927961-49931818	ENSG00000248764.1	RP11-292D4.2.1	lncRNA	chr4:147855152-147866623	ENSG00000207732.1	MIR218-1	miRNA	chr4:20529897-20530007
ENSG00000177684.3	DEFB114	coding	chr6:49927961-49931818	ENSG00000259553.1	AC140725.4.1	lncRNA	chr15:102500050-102501611	ENSG00000207732.1	MIR218-1	miRNA	chr4:20529897-20530007
ENSG00000177684.3	DEFB114	coding	chr6:49927961-49931818	ENSG00000249881.1	CTB-57H20.1.1	lncRNA	chr5:142985192-143208337	ENSG00000211538.1	MIR501	miRNA	chrX:49774329-49774413
ENSG00000177684.3	DEFB114	coding	chr6:49927961-49931818	ENSG00000232971.1	RP11-293A10.3.1	lncRNA	chr1:109276877-109278894	ENSG00000221203.1	MIR1262	miRNA	chr1:68649200-68649293
ENSG00000177684.3	DEFB114	coding	chr6:49927961-49931818	ENSG00000225565.1	RP11-54A22.2.1	lncRNA	chr9:137519675-137521252	ENSG00000238682.1	MIR376C	miRNA	chr14:101506016-101506102
ENSG00000177684.3	DEFB114	coding	chr6:49927961-49931818	ENSG00000236193.1	AC079610.1.1	lncRNA	chr2:214020529-214032436	ENSG00000207813.1	MIR605	miRNA	chr10:53059332-53059415
ENSG00000177684.3	DEFB114	coding	chr6:49927961-49931818	ENSG00000236193.1	AC079610.1.1	lncRNA	chr2:214020529-214032436	ENSG00000221203.1	MIR1262	miRNA	chr1:68649200-68649293
ENSG00000177684.3	DEFB114	coding	chr6:49927961-49931818	ENSG00000225316.1	LINC00350	lncRNA	chr13:20161257-20162490	ENSG00000221628.1	MIR1302-4	miRNA	chr2:208133998-208134148
ENSG00000177684.3	DEFB114	coding	chr6:49927961-49931818	ENSG00000225316.1	LINC00350	lncRNA	chr13:20161257-20162490	ENSG00000221025.1	MIR1250	miRNA	chr17:79106995-79107108
ENSG00000177684.3	DEFB114	coding	chr6:49927961-49931818	ENSG00000228521.2	AC099552.3.1	lncRNA	chr7:154995856-154996899	ENSG00000207813.1	MIR605	miRNA	chr10:53059332-53059415
ENSG00000177684.3	DEFB114	coding	chr6:49927961-49931818	ENSG00000228521.2	AC099552.3.1	lncRNA	chr7:154995856-154996899	ENSG00000221628.1	MIR1302-4	miRNA	chr2:208133998-208134148
ENSG00000177684.3	DEFB114	coding	chr6:49927961-49931818	ENSG00000261036.1	RP11-574H6.1.1	lncRNA	chr5:119681601-119740532	ENSG00000207771.1	MIR550A1	miRNA	chr7:30329409-30329506
ENSG00000177684.3	DEFB114	coding	chr6:49927961-49931818	ENSG00000254160.1	CTD-2281E23.3.1	lncRNA	chr8:1196788-1198760	ENSG00000207706.1	MIR518F	miRNA	chr19:54203268-54203355
ENSG00000177684.3	DEFB114	coding	chr6:49927961-49931818	ENSG00000254160.1	CTD-2281E23.3.1	lncRNA	chr8:1196788-1198760	ENSG00000207629.1	MIR526A1	miRNA	chr19:54209505-54209590
ENSG00000177684.3	DEFB114	coding	chr6:49927961-49931818	ENSG00000257932.1	RP11-155I9.1.1	lncRNA	chr12:30473766-30474550	ENSG00000207771.1	MIR550A1	miRNA	chr7:30329409-30329506
ENSG00000177684.3	DEFB114	coding	chr6:49927961-49931818	ENSG00000233519.1	RP11-177F11.1.1	lncRNA	chr1:240563970-240564423	ENSG00000207771.1	MIR550A1	miRNA	chr7:30329409-30329506
ENSG00000177684.3	DEFB114	coding	chr6:49927961-49931818	ENSG00000251421.1	CTC-369A16.2.1	lncRNA	chr5:123731295-123736088	ENSG00000207771.1	MIR550A1	miRNA	chr7:30329409-30329506
ENSG00000177684.3	DEFB114	coding	chr6:49927961-49931818	ENSG00000255187.1	RP11-699F16.2.1	lncRNA	chr11:90891250-90900462	ENSG00000207771.1	MIR550A1	miRNA	chr7:30329409-30329506
ENSG00000177684.3	DEFB114	coding	chr6:49927961-49931818	ENSG00000256803.1	RP11-133L14.5.1	lncRNA	chr12:10167838-10183205	ENSG00000211538.1	MIR501	miRNA	chrX:49774329-49774413
ENSG00000177684.3	DEFB114	coding	chr6:49927961-49931818	ENSG00000259754.1	RP11-208K4.1.1	lncRNA	chr15:48176506-48341309	ENSG00000207813.1	MIR605	miRNA	chr10:53059332-53059415
ENSG00000177684.3	DEFB114	coding	chr6:49927961-49931818	ENSG00000260785.1	RP11-879D6.1.1	lncRNA	chr17:69093915-69198318	ENSG00000207813.1	MIR605	miRNA	chr10:53059332-53059415
ENSG00000177684.3	DEFB114	coding	chr6:49927961-49931818	ENSG00000256071.1	RP11-465L8.1.1	lncRNA	chr12:118327258-118328813	ENSG00000207813.1	MIR605	miRNA	chr10:53059332-53059415
ENSG00000177684.3	DEFB114	coding	chr6:49927961-49931818	ENSG00000237001.1	WASF3-AS1	lncRNA	chr13:27212585-27215501	ENSG00000207813.1	MIR605	miRNA	chr10:53059332-53059415
ENSG00000177684.3	DEFB114	coding	chr6:49927961-49931818	ENSG00000254594.1	RP11-2F20.1.1	lncRNA	chr11:24257022-24283764	ENSG00000211538.1	MIR501	miRNA	chrX:49774329-49774413
ENSG00000177684.3	DEFB114	coding	chr6:49927961-49931818	ENSG00000224857.1	AL592494.1.1	lncRNA	chr1:121315743-121322322	ENSG00000221203.1	MIR1262	miRNA	chr1:68649200-68649293
ENSG00000177684.3	DEFB114	coding	chr6:49927961-49931818	ENSG00000231557.1	AC018717.1.1	lncRNA	chr2:199747296-199936514	ENSG00000221628.1	MIR1302-4	miRNA	chr2:208133998-208134148
ENSG00000177684.3	DEFB114	coding	chr6:49927961-49931818	ENSG00000251293.1	CTC-552D5.1.1	lncRNA	chr5:119581142-119669197	ENSG00000221628.1	MIR1302-4	miRNA	chr2:208133998-208134148
ENSG00000177684.3	DEFB114	coding	chr6:49927961-49931818	ENSG00000249792.1	RP11-1072N2.3.1	lncRNA	chr5:84508775-84509432	ENSG00000221628.1	MIR1302-4	miRNA	chr2:208133998-208134148
ENSG00000177684.3	DEFB114	coding	chr6:49927961-49931818	ENSG00000227332.1	LINC00419	lncRNA	chr13:19433966-19434882	ENSG00000238682.1	MIR376C	miRNA	chr14:101506016-101506102
ENSG00000177684.3	DEFB114	coding	chr6:49927961-49931818	ENSG00000261363.1	RP11-134D3.2.1	lncRNA	chr16:87100310-87103354	ENSG00000221203.1	MIR1262	miRNA	chr1:68649200-68649293
ENSG00000177684.3	DEFB114	coding	chr6:49927961-49931818	ENSG00000253583.1	RP11-573J24.1.1	lncRNA	chr8:64498557-64501966	ENSG00000221203.1	MIR1262	miRNA	chr1:68649200-68649293
ENSG00000177684.3	DEFB114	coding	chr6:49927961-49931818	ENSG00000232395.1	RP3-399L15.1.1	lncRNA	chr6:114798513-114809916	ENSG00000221203.1	MIR1262	miRNA	chr1:68649200-68649293
ENSG00000177684.3	DEFB114	coding	chr6:49927961-49931818	ENSG00000236176.1	LINC00353	lncRNA	chr13:90200944-90206058	ENSG00000221203.1	MIR1262	miRNA	chr1:68649200-68649293
ENSG00000177684.3	DEFB114	coding	chr6:49927961-49931818	ENSG00000253924.1	RP11-1023P17.2.1	lncRNA	chr8:53207014-53214502	ENSG00000221203.1	MIR1262	miRNA	chr1:68649200-68649293
ENSG00000177684.3	DEFB114	coding	chr6:49927961-49931818	ENSG00000237001.1	WASF3-AS1	lncRNA	chr13:27212585-27215501	ENSG00000207952.1	MIR624	miRNA	chr14:31483851-31483948
ENSG00000177684.3	DEFB114	coding	chr6:49927961-49931818	ENSG00000259035.1	RP11-666E17.1.1	lncRNA	chr14:82207345-82496693	ENSG00000198997.1	MIR107	miRNA	chr10:91352499-91352586
ENSG00000177684.3	DEFB114	coding	chr6:49927961-49931818	ENSG00000257932.1	RP11-155I9.1.1	lncRNA	chr12:30473766-30474550	ENSG00000211538.1	MIR501	miRNA	chrX:49774329-49774413
ENSG00000177684.3	DEFB114	coding	chr6:49927961-49931818	ENSG00000253762.1	RP11-579E24.2.1	lncRNA	chr8:64617313-64664235	ENSG00000207629.1	MIR526A1	miRNA	chr19:54209505-54209590
ENSG00000177684.3	DEFB114	coding	chr6:49927961-49931818	ENSG00000235464.1	AC007652.1.1	lncRNA	chr7:35535630-35549873	ENSG00000221025.1	MIR1250	miRNA	chr17:79106995-79107108
ENSG00000177684.3	DEFB114	coding	chr6:49927961-49931818	ENSG00000238265.1	LINC00317	lncRNA	chr21:23095612-23109639	ENSG00000207706.1	MIR518F	miRNA	chr19:54203268-54203355
ENSG00000177684.3	DEFB114	coding	chr6:49927961-49931818	ENSG00000227016.1	RP11-262K1.1.1	lncRNA	chr1:73240953-73256963	ENSG00000208017.1	MIR140	miRNA	chr16:69966983-69967083
ENSG00000177684.3	DEFB114	coding	chr6:49927961-49931818	ENSG00000253583.1	RP11-573J24.1.1	lncRNA	chr8:64498557-64501966	ENSG00000198997.1	MIR107	miRNA	chr10:91352499-91352586
ENSG00000177684.3	DEFB114	coding	chr6:49927961-49931818	ENSG00000228011.1	LINC00413	lncRNA	chr13:78236634-78237275	ENSG00000207629.1	MIR526A1	miRNA	chr19:54209505-54209590
ENSG00000177684.3	DEFB114	coding	chr6:49927961-49931818	ENSG00000250665.1	RP11-775H9.1.1	lncRNA	chr4:137047063-137060029	ENSG00000198997.1	MIR107	miRNA	chr10:91352499-91352586
ENSG00000177684.3	DEFB114	coding	chr6:49927961-49931818	ENSG00000261815.1	RP11-22D3.2.1	lncRNA	chr16:49204462-49205697	ENSG00000198997.1	MIR107	miRNA	chr10:91352499-91352586
ENSG00000177684.3	DEFB114	coding	chr6:49927961-49931818	ENSG00000229791.1	LINC00420	lncRNA	chr13:19982181-19983669	ENSG00000198997.1	MIR107	miRNA	chr10:91352499-91352586
ENSG00000177684.3	DEFB114	coding	chr6:49927961-49931818	ENSG00000236392.1	AC100848.1.1	lncRNA	chr18:61814442-61826533	ENSG00000207838.1	MIR517C	miRNA	chr19:54244566-54244661
ENSG00000177684.3	DEFB114	coding	chr6:49927961-49931818	ENSG00000257319.1	RP11-478B9.1.1	lncRNA	chr12:45444683-45496890	ENSG00000207706.1	MIR518F	miRNA	chr19:54203268-54203355
ENSG00000177684.3	DEFB114	coding	chr6:49927961-49931818	ENSG00000243583.1	RP4-669B10.3.1	lncRNA	chr7:143651936-143694405	ENSG00000208009.1	MIR130A	miRNA	chr11:57408670-57408759
ENSG00000177684.3	DEFB114	coding	chr6:49927961-49931818	ENSG00000233290.1	RP11-147G16.1.1	lncRNA	chr1:82680903-82726817	ENSG00000221025.1	MIR1250	miRNA	chr17:79106995-79107108
ENSG00000177684.3	DEFB114	coding	chr6:49927961-49931818	ENSG00000254033.1	RP11-431M3.2.1	lncRNA	chr8:34086811-34106464	ENSG00000221025.1	MIR1250	miRNA	chr17:79106995-79107108
ENSG00000177684.3	DEFB114	coding	chr6:49927961-49931818	ENSG00000237283.1	RP11-316I3.1.1	lncRNA	chr1:188674753-188680011	ENSG00000221025.1	MIR1250	miRNA	chr17:79106995-79107108
ENSG00000177684.3	DEFB114	coding	chr6:49927961-49931818	ENSG00000259267.1	RP11-432J9.6.1	lncRNA	chr10:72698809-72715398	ENSG00000221025.1	MIR1250	miRNA	chr17:79106995-79107108
ENSG00000177684.3	DEFB114	coding	chr6:49927961-49931818	ENSG00000258098.1	RP11-89K22.1.1	lncRNA	chr14:25593692-25596204	ENSG00000211538.1	MIR501	miRNA	chrX:49774329-49774413
ENSG00000177684.3	DEFB114	coding	chr6:49927961-49931818	ENSG00000229925.1	AP001043.1.1	lncRNA	chr21:40260695-40275829	ENSG00000208017.1	MIR140	miRNA	chr16:69966983-69967083
ENSG00000177684.3	DEFB114	coding	chr6:49927961-49931818	ENSG00000250032.1	CTD-2194L12.3.1	lncRNA	chr5:37939466-37948057	ENSG00000238682.1	MIR376C	miRNA	chr14:101506016-101506102
ENSG00000177684.3	DEFB114	coding	chr6:49927961-49931818	ENSG00000249818.1	RP11-73G16.3.1	lncRNA	chr4:152826083-152849800	ENSG00000208009.1	MIR130A	miRNA	chr11:57408670-57408759
ENSG00000177684.3	DEFB114	coding	chr6:49927961-49931818	ENSG00000259395.1	RP11-475A13.2.1	lncRNA	chr15:36633939-36636367	ENSG00000208009.1	MIR130A	miRNA	chr11:57408670-57408759
ENSG00000177684.3	DEFB114	coding	chr6:49927961-49931818	ENSG00000256071.1	RP11-465L8.1.1	lncRNA	chr12:118327258-118328813	ENSG00000208009.1	MIR130A	miRNA	chr11:57408670-57408759
ENSG00000177684.3	DEFB114	coding	chr6:49927961-49931818	ENSG00000233290.1	RP11-147G16.1.1	lncRNA	chr1:82680903-82726817	ENSG00000211538.1	MIR501	miRNA	chrX:49774329-49774413
ENSG00000177684.3	DEFB114	coding	chr6:49927961-49931818	ENSG00000237001.1	WASF3-AS1	lncRNA	chr13:27212585-27215501	ENSG00000211538.1	MIR501	miRNA	chrX:49774329-49774413
ENSG00000177684.3	DEFB114	coding	chr6:49927961-49931818	ENSG00000248311.1	CTD-2161F6.2.1	lncRNA	chr5:4775588-4805882	ENSG00000211538.1	MIR501	miRNA	chrX:49774329-49774413
ENSG00000177684.3	DEFB114	coding	chr6:49927961-49931818	ENSG00000259813.1	RP5-1142A6.5.1	lncRNA	chr16:88762908-88765018	ENSG00000211538.1	MIR501	miRNA	chrX:49774329-49774413
ENSG00000177684.3	DEFB114	coding	chr6:49927961-49931818	ENSG00000228504.1	RP4-586O15.1.1	lncRNA	chr1:95776483-95783819	ENSG00000211538.1	MIR501	miRNA	chrX:49774329-49774413
ENSG00000177684.3	DEFB114	coding	chr6:49927961-49931818	ENSG00000235566.1	BX004987.7.1	lncRNA	chr1:143527404-143533272	ENSG00000211538.1	MIR501	miRNA	chrX:49774329-49774413
ENSG00000177684.3	DEFB114	coding	chr6:49927961-49931818	ENSG00000240895.1	RP11-119D18.1.1	lncRNA	chr3:110246328-110248429	ENSG00000211538.1	MIR501	miRNA	chrX:49774329-49774413
ENSG00000177684.3	DEFB114	coding	chr6:49927961-49931818	ENSG00000233651.1	RP11-111F5.8.1	lncRNA	chr9:46698573-46705305	ENSG00000207629.1	MIR526A1	miRNA	chr19:54209505-54209590
ENSG00000177684.3	DEFB114	coding	chr6:49927961-49931818	ENSG00000255187.1	RP11-699F16.2.1	lncRNA	chr11:90891250-90900462	ENSG00000238682.1	MIR376C	miRNA	chr14:101506016-101506102
ENSG00000177684.3	DEFB114	coding	chr6:49927961-49931818	ENSG00000249150.1	CTC-472C24.1.1	lncRNA	chr5:116156688-116165883	ENSG00000238682.1	MIR376C	miRNA	chr14:101506016-101506102
ENSG00000177684.3	DEFB114	coding	chr6:49927961-49931818	ENSG00000259813.1	RP5-1142A6.5.1	lncRNA	chr16:88762908-88765018	ENSG00000238682.1	MIR376C	miRNA	chr14:101506016-101506102
ENSG00000177684.3	DEFB114	coding	chr6:49927961-49931818	ENSG00000225129.1	RP4-614C15.2.1	lncRNA	chr20:57927249-57932829	ENSG00000238682.1	MIR376C	miRNA	chr14:101506016-101506102
ENSG00000177684.3	DEFB114	coding	chr6:49927961-49931818	ENSG00000250908.1	RP11-703C10.1.1	lncRNA	chr4:94239773-94240937	ENSG00000238682.1	MIR376C	miRNA	chr14:101506016-101506102
ENSG00000177684.3	DEFB114	coding	chr6:49927961-49931818	ENSG00000233290.1	RP11-147G16.1.1	lncRNA	chr1:82680903-82726817	ENSG00000208009.1	MIR130A	miRNA	chr11:57408670-57408759
ENSG00000177684.3	DEFB114	coding	chr6:49927961-49931818	ENSG00000259813.1	RP5-1142A6.5.1	lncRNA	chr16:88762908-88765018	ENSG00000208009.1	MIR130A	miRNA	chr11:57408670-57408759
ENSG00000198657.3	OR8B4	coding	chr11:124293806-124294789	ENSG00000251276.1	MAGI2-AS1	lncRNA	chr7:78569165-78570211	ENSG00000207633.1	MIR505	miRNA	chrX:139006306-139006390
ENSG00000198657.3	OR8B4	coding	chr11:124293806-124294789	ENSG00000251276.1	MAGI2-AS1	lncRNA	chr7:78569165-78570211	ENSG00000199150.1	MIRLET7G	miRNA	chr3:52302291-52302379
ENSG00000198657.3	OR8B4	coding	chr11:124293806-124294789	ENSG00000251276.1	MAGI2-AS1	lncRNA	chr7:78569165-78570211	ENSG00000207609.1	MIR491	miRNA	chr9:20716103-20716187
ENSG00000198657.3	OR8B4	coding	chr11:124293806-124294789	ENSG00000258958.1	RP11-594C13.2.1	lncRNA	chr14:87790096-87798734	ENSG00000207633.1	MIR505	miRNA	chrX:139006306-139006390
ENSG00000198657.3	OR8B4	coding	chr11:124293806-124294789	ENSG00000258683.1	RP11-11K13.1.1	lncRNA	chr14:83254821-83262565	ENSG00000207633.1	MIR505	miRNA	chrX:139006306-139006390
ENSG00000198657.3	OR8B4	coding	chr11:124293806-124294789	ENSG00000236109.1	AC013402.3.1	lncRNA	chr2:105199609-105201812	ENSG00000207633.1	MIR505	miRNA	chrX:139006306-139006390
ENSG00000198657.3	OR8B4	coding	chr11:124293806-124294789	ENSG00000234830.2	FAM197Y9	lncRNA	chrY:6124307-6131994	ENSG00000207633.1	MIR505	miRNA	chrX:139006306-139006390
ENSG00000198657.3	OR8B4	coding	chr11:124293806-124294789	ENSG00000231481.1	RP11-292F9.2.1	lncRNA	chr9:46359241-46380257	ENSG00000207633.1	MIR505	miRNA	chrX:139006306-139006390
ENSG00000198657.3	OR8B4	coding	chr11:124293806-124294789	ENSG00000235492.1	RP11-16L9.4.1	lncRNA	chr1:198985261-199045864	ENSG00000207633.1	MIR505	miRNA	chrX:139006306-139006390
ENSG00000198657.3	OR8B4	coding	chr11:124293806-124294789	ENSG00000230159.1	RP11-232D9.3.1	lncRNA	chrX:115826877-115828156	ENSG00000207633.1	MIR505	miRNA	chrX:139006306-139006390
ENSG00000198657.3	OR8B4	coding	chr11:124293806-124294789	ENSG00000254488.1	RP11-65G9.1.1	lncRNA	chrY:23200174-23206610	ENSG00000207633.1	MIR505	miRNA	chrX:139006306-139006390
ENSG00000198657.3	OR8B4	coding	chr11:124293806-124294789	ENSG00000243349.1	RP11-445N18.7.1	lncRNA	chr10:45642841-45645173	ENSG00000207633.1	MIR505	miRNA	chrX:139006306-139006390
ENSG00000198657.3	OR8B4	coding	chr11:124293806-124294789	ENSG00000236151.1	RP5-1100I6.1.1	lncRNA	chr20:24123225-24125022	ENSG00000199150.1	MIRLET7G	miRNA	chr3:52302291-52302379
ENSG00000198657.3	OR8B4	coding	chr11:124293806-124294789	ENSG00000227466.1	RP11-397C12.1.1	lncRNA	chr1:66508182-66516401	ENSG00000221230.1	MIR548L	miRNA	chr11:94199660-94199746
ENSG00000198657.3	OR8B4	coding	chr11:124293806-124294789	ENSG00000233574.1	CTA-929C8.5.1	lncRNA	chr22:27672200-27682310	ENSG00000199150.1	MIRLET7G	miRNA	chr3:52302291-52302379
ENSG00000198657.3	OR8B4	coding	chr11:124293806-124294789	ENSG00000258958.1	RP11-594C13.2.1	lncRNA	chr14:87790096-87798734	ENSG00000199150.1	MIRLET7G	miRNA	chr3:52302291-52302379
ENSG00000198657.3	OR8B4	coding	chr11:124293806-124294789	ENSG00000236109.1	AC013402.3.1	lncRNA	chr2:105199609-105201812	ENSG00000199150.1	MIRLET7G	miRNA	chr3:52302291-52302379
ENSG00000198657.3	OR8B4	coding	chr11:124293806-124294789	ENSG00000234830.2	FAM197Y9	lncRNA	chrY:6124307-6131994	ENSG00000199150.1	MIRLET7G	miRNA	chr3:52302291-52302379
ENSG00000198657.3	OR8B4	coding	chr11:124293806-124294789	ENSG00000235492.1	RP11-16L9.4.1	lncRNA	chr1:198985261-199045864	ENSG00000199150.1	MIRLET7G	miRNA	chr3:52302291-52302379
ENSG00000198657.3	OR8B4	coding	chr11:124293806-124294789	ENSG00000230159.1	RP11-232D9.3.1	lncRNA	chrX:115826877-115828156	ENSG00000199150.1	MIRLET7G	miRNA	chr3:52302291-52302379
ENSG00000198657.3	OR8B4	coding	chr11:124293806-124294789	ENSG00000254488.1	RP11-65G9.1.1	lncRNA	chrY:23200174-23206610	ENSG00000199150.1	MIRLET7G	miRNA	chr3:52302291-52302379
ENSG00000198657.3	OR8B4	coding	chr11:124293806-124294789	ENSG00000258958.1	RP11-594C13.2.1	lncRNA	chr14:87790096-87798734	ENSG00000207609.1	MIR491	miRNA	chr9:20716103-20716187
ENSG00000198657.3	OR8B4	coding	chr11:124293806-124294789	ENSG00000258683.1	RP11-11K13.1.1	lncRNA	chr14:83254821-83262565	ENSG00000207609.1	MIR491	miRNA	chr9:20716103-20716187
ENSG00000198657.3	OR8B4	coding	chr11:124293806-124294789	ENSG00000236109.1	AC013402.3.1	lncRNA	chr2:105199609-105201812	ENSG00000207609.1	MIR491	miRNA	chr9:20716103-20716187
ENSG00000198657.3	OR8B4	coding	chr11:124293806-124294789	ENSG00000234830.2	FAM197Y9	lncRNA	chrY:6124307-6131994	ENSG00000207609.1	MIR491	miRNA	chr9:20716103-20716187
ENSG00000198657.3	OR8B4	coding	chr11:124293806-124294789	ENSG00000231481.1	RP11-292F9.2.1	lncRNA	chr9:46359241-46380257	ENSG00000207609.1	MIR491	miRNA	chr9:20716103-20716187
ENSG00000198657.3	OR8B4	coding	chr11:124293806-124294789	ENSG00000235492.1	RP11-16L9.4.1	lncRNA	chr1:198985261-199045864	ENSG00000207609.1	MIR491	miRNA	chr9:20716103-20716187
ENSG00000198657.3	OR8B4	coding	chr11:124293806-124294789	ENSG00000230159.1	RP11-232D9.3.1	lncRNA	chrX:115826877-115828156	ENSG00000207609.1	MIR491	miRNA	chr9:20716103-20716187
ENSG00000198657.3	OR8B4	coding	chr11:124293806-124294789	ENSG00000254488.1	RP11-65G9.1.1	lncRNA	chrY:23200174-23206610	ENSG00000207609.1	MIR491	miRNA	chr9:20716103-20716187
ENSG00000198657.3	OR8B4	coding	chr11:124293806-124294789	ENSG00000243349.1	RP11-445N18.7.1	lncRNA	chr10:45642841-45645173	ENSG00000207609.1	MIR491	miRNA	chr9:20716103-20716187
ENSG00000128519.2	TAS2R16	coding	chr7:122634758-122635754	ENSG00000233193.1	AC005324.7.1	lncRNA	chr17:15664927-15667083	ENSG00000221548.1	MIR1283-2	miRNA	chr19:54261485-54261572
ENSG00000128519.2	TAS2R16	coding	chr7:122634758-122635754	ENSG00000232512.1	AP000233.2.1	lncRNA	chr21:26467334-26475983	ENSG00000221548.1	MIR1283-2	miRNA	chr19:54261485-54261572
ENSG00000128519.2	TAS2R16	coding	chr7:122634758-122635754	ENSG00000249152.1	RP11-562F9.2.1	lncRNA	chr4:93189917-93198226	ENSG00000221548.1	MIR1283-2	miRNA	chr19:54261485-54261572
ENSG00000128519.2	TAS2R16	coding	chr7:122634758-122635754	ENSG00000232964.1	RP11-543E8.1.1	lncRNA	chr1:230728405-230731329	ENSG00000221548.1	MIR1283-2	miRNA	chr19:54261485-54261572
ENSG00000128519.2	TAS2R16	coding	chr7:122634758-122635754	ENSG00000231718.1	RP11-382E9.1.1	lncRNA	chr1:199117725-199362435	ENSG00000221548.1	MIR1283-2	miRNA	chr19:54261485-54261572
ENSG00000128519.2	TAS2R16	coding	chr7:122634758-122635754	ENSG00000231363.1	RP11-148B18.1.1	lncRNA	chr1:94713463-94715048	ENSG00000221548.1	MIR1283-2	miRNA	chr19:54261485-54261572
ENSG00000128519.2	TAS2R16	coding	chr7:122634758-122635754	ENSG00000225070.1	LL22NC03-23C6.13.1	lncRNA	chr22:22390742-22394463	ENSG00000221548.1	MIR1283-2	miRNA	chr19:54261485-54261572
ENSG00000128519.2	TAS2R16	coding	chr7:122634758-122635754	ENSG00000227608.1	DCUN1D2-AS1	lncRNA	chr13:114110943-114116670	ENSG00000221548.1	MIR1283-2	miRNA	chr19:54261485-54261572
ENSG00000128519.2	TAS2R16	coding	chr7:122634758-122635754	ENSG00000248431.1	AC005150.1.1	lncRNA	chr4:163661819-163663200	ENSG00000221548.1	MIR1283-2	miRNA	chr19:54261485-54261572
ENSG00000128519.2	TAS2R16	coding	chr7:122634758-122635754	ENSG00000261376.1	RP11-525K10.2.1	lncRNA	chr16:80213025-80214579	ENSG00000221548.1	MIR1283-2	miRNA	chr19:54261485-54261572
ENSG00000128519.2	TAS2R16	coding	chr7:122634758-122635754	ENSG00000261154.1	RP11-571O6.1.1	lncRNA	chr16:77624702-77644578	ENSG00000221548.1	MIR1283-2	miRNA	chr19:54261485-54261572
ENSG00000128519.2	TAS2R16	coding	chr7:122634758-122635754	ENSG00000229395.1	AC013401.1.1	lncRNA	chr2:193494644-193510432	ENSG00000221548.1	MIR1283-2	miRNA	chr19:54261485-54261572
ENSG00000128519.2	TAS2R16	coding	chr7:122634758-122635754	ENSG00000258108.1	RP11-1028N23.3.1	lncRNA	chr12:116007468-116019544	ENSG00000221548.1	MIR1283-2	miRNA	chr19:54261485-54261572
ENSG00000128519.2	TAS2R16	coding	chr7:122634758-122635754	ENSG00000258007.1	RP11-350G24.1.1	lncRNA	chr12:101432197-101432872	ENSG00000221548.1	MIR1283-2	miRNA	chr19:54261485-54261572
ENSG00000128519.2	TAS2R16	coding	chr7:122634758-122635754	ENSG00000229791.1	LINC00420	lncRNA	chr13:19982181-19983669	ENSG00000221548.1	MIR1283-2	miRNA	chr19:54261485-54261572
ENSG00000128519.2	TAS2R16	coding	chr7:122634758-122635754	ENSG00000259107.1	CTD-2128A3.1.1	lncRNA	chr14:85860222-85886418	ENSG00000221548.1	MIR1283-2	miRNA	chr19:54261485-54261572
ENSG00000128519.2	TAS2R16	coding	chr7:122634758-122635754	ENSG00000257947.1	RP11-46I1.1.1	lncRNA	chr12:44638176-44657765	ENSG00000221548.1	MIR1283-2	miRNA	chr19:54261485-54261572
ENSG00000128519.2	TAS2R16	coding	chr7:122634758-122635754	ENSG00000258723.1	RP11-332E19.2.1	lncRNA	chr14:78745914-78749719	ENSG00000221548.1	MIR1283-2	miRNA	chr19:54261485-54261572
ENSG00000128519.2	TAS2R16	coding	chr7:122634758-122635754	ENSG00000244968.2	LIFR-AS1	lncRNA	chr5:38556887-38671318	ENSG00000207976.1	MIR607	miRNA	chr10:98588425-98588521
ENSG00000128519.2	TAS2R16	coding	chr7:122634758-122635754	ENSG00000236914.3	RP11-1008C21.2.1	lncRNA	chr15:38361681-38365160	ENSG00000207976.1	MIR607	miRNA	chr10:98588425-98588521
ENSG00000128519.2	TAS2R16	coding	chr7:122634758-122635754	ENSG00000226169.1	RP11-375H17.1.1	lncRNA	chr22:28112467-28117665	ENSG00000207976.1	MIR607	miRNA	chr10:98588425-98588521
ENSG00000128519.2	TAS2R16	coding	chr7:122634758-122635754	ENSG00000254552.1	XIRP2-AS1	lncRNA	chr2:167980413-167997465	ENSG00000207976.1	MIR607	miRNA	chr10:98588425-98588521
ENSG00000128519.2	TAS2R16	coding	chr7:122634758-122635754	ENSG00000232971.1	RP11-293A10.3.1	lncRNA	chr1:109276877-109278894	ENSG00000207976.1	MIR607	miRNA	chr10:98588425-98588521
ENSG00000128519.2	TAS2R16	coding	chr7:122634758-122635754	ENSG00000237874.1	RP3-393K13.1.1	lncRNA	chr6:84437773-84446244	ENSG00000207976.1	MIR607	miRNA	chr10:98588425-98588521
ENSG00000128519.2	TAS2R16	coding	chr7:122634758-122635754	ENSG00000230803.1	AC097532.2.1	lncRNA	chr2:133043367-133051950	ENSG00000207976.1	MIR607	miRNA	chr10:98588425-98588521
ENSG00000128519.2	TAS2R16	coding	chr7:122634758-122635754	ENSG00000254659.1	RP11-262A12.1.1	lncRNA	chr11:109622171-109694573	ENSG00000207976.1	MIR607	miRNA	chr10:98588425-98588521
ENSG00000128519.2	TAS2R16	coding	chr7:122634758-122635754	ENSG00000258108.1	RP11-1028N23.3.1	lncRNA	chr12:116007468-116019544	ENSG00000207976.1	MIR607	miRNA	chr10:98588425-98588521
ENSG00000128519.2	TAS2R16	coding	chr7:122634758-122635754	ENSG00000237790.1	AC009499.2.1	lncRNA	chr2:34292292-34294617	ENSG00000207976.1	MIR607	miRNA	chr10:98588425-98588521
ENSG00000128519.2	TAS2R16	coding	chr7:122634758-122635754	ENSG00000261627.1	RP11-91I8.1.1	lncRNA	chr18:6641969-6642477	ENSG00000207976.1	MIR607	miRNA	chr10:98588425-98588521
ENSG00000128519.2	TAS2R16	coding	chr7:122634758-122635754	ENSG00000229791.1	LINC00420	lncRNA	chr13:19982181-19983669	ENSG00000207976.1	MIR607	miRNA	chr10:98588425-98588521
ENSG00000128519.2	TAS2R16	coding	chr7:122634758-122635754	ENSG00000257947.1	RP11-46I1.1.1	lncRNA	chr12:44638176-44657765	ENSG00000207976.1	MIR607	miRNA	chr10:98588425-98588521
ENSG00000128519.2	TAS2R16	coding	chr7:122634758-122635754	ENSG00000248673.1	CTC-419K13.1.1	lncRNA	chr5:73665200-73832801	ENSG00000207976.1	MIR607	miRNA	chr10:98588425-98588521
ENSG00000128519.2	TAS2R16	coding	chr7:122634758-122635754	ENSG00000259998.1	RP11-753D20.4.1	lncRNA	chr14:88624583-88626935	ENSG00000207976.1	MIR607	miRNA	chr10:98588425-98588521
ENSG00000128519.2	TAS2R16	coding	chr7:122634758-122635754	ENSG00000232512.1	AP000233.2.1	lncRNA	chr21:26467334-26475983	ENSG00000207996.1	MIR301A	miRNA	chr17:57228496-57228582
ENSG00000128519.2	TAS2R16	coding	chr7:122634758-122635754	ENSG00000249152.1	RP11-562F9.2.1	lncRNA	chr4:93189917-93198226	ENSG00000207996.1	MIR301A	miRNA	chr17:57228496-57228582
ENSG00000128519.2	TAS2R16	coding	chr7:122634758-122635754	ENSG00000225070.1	LL22NC03-23C6.13.1	lncRNA	chr22:22390742-22394463	ENSG00000207996.1	MIR301A	miRNA	chr17:57228496-57228582
ENSG00000128519.2	TAS2R16	coding	chr7:122634758-122635754	ENSG00000229458.2	RP11-202D18.2.1	lncRNA	chr10:83983968-83988935	ENSG00000207996.1	MIR301A	miRNA	chr17:57228496-57228582
ENSG00000128519.2	TAS2R16	coding	chr7:122634758-122635754	ENSG00000227608.1	DCUN1D2-AS1	lncRNA	chr13:114110943-114116670	ENSG00000207996.1	MIR301A	miRNA	chr17:57228496-57228582
ENSG00000128519.2	TAS2R16	coding	chr7:122634758-122635754	ENSG00000261376.1	RP11-525K10.2.1	lncRNA	chr16:80213025-80214579	ENSG00000207996.1	MIR301A	miRNA	chr17:57228496-57228582
ENSG00000128519.2	TAS2R16	coding	chr7:122634758-122635754	ENSG00000261154.1	RP11-571O6.1.1	lncRNA	chr16:77624702-77644578	ENSG00000207996.1	MIR301A	miRNA	chr17:57228496-57228582
ENSG00000128519.2	TAS2R16	coding	chr7:122634758-122635754	ENSG00000258007.1	RP11-350G24.1.1	lncRNA	chr12:101432197-101432872	ENSG00000207996.1	MIR301A	miRNA	chr17:57228496-57228582
ENSG00000128519.2	TAS2R16	coding	chr7:122634758-122635754	ENSG00000259107.1	CTD-2128A3.1.1	lncRNA	chr14:85860222-85886418	ENSG00000207996.1	MIR301A	miRNA	chr17:57228496-57228582
ENSG00000128519.2	TAS2R16	coding	chr7:122634758-122635754	ENSG00000261376.1	RP11-525K10.2.1	lncRNA	chr16:80213025-80214579	ENSG00000208009.1	MIR130A	miRNA	chr11:57408670-57408759
ENSG00000128519.2	TAS2R16	coding	chr7:122634758-122635754	ENSG00000258723.1	RP11-332E19.2.1	lncRNA	chr14:78745914-78749719	ENSG00000208009.1	MIR130A	miRNA	chr11:57408670-57408759
ENSG00000183035.7	CYLC1	coding	chrX:83116153-83254350	ENSG00000236145.1	AC079988.3.1	lncRNA	chr2:121935902-121940156	ENSG00000207551.1	MIR608	miRNA	chr10:102734741-102734841
ENSG00000183035.7	CYLC1	coding	chrX:83116153-83254350	ENSG00000244968.2	LIFR-AS1	lncRNA	chr5:38556887-38671318	ENSG00000207551.1	MIR608	miRNA	chr10:102734741-102734841
ENSG00000183035.7	CYLC1	coding	chrX:83116153-83254350	ENSG00000244968.2	LIFR-AS1	lncRNA	chr5:38556887-38671318	ENSG00000198984.1	MIR345	miRNA	chr14:100774195-100774293
ENSG00000183035.7	CYLC1	coding	chrX:83116153-83254350	ENSG00000244968.2	LIFR-AS1	lncRNA	chr5:38556887-38671318	ENSG00000221333.1	MIR548K	miRNA	chr11:70130060-70130176
ENSG00000183035.7	CYLC1	coding	chrX:83116153-83254350	ENSG00000236436.1	AC012361.1.1	lncRNA	chr2:21059530-21061421	ENSG00000198984.1	MIR345	miRNA	chr14:100774195-100774293
ENSG00000183035.7	CYLC1	coding	chrX:83116153-83254350	ENSG00000236436.1	AC012361.1.1	lncRNA	chr2:21059530-21061421	ENSG00000221333.1	MIR548K	miRNA	chr11:70130060-70130176
ENSG00000183035.7	CYLC1	coding	chrX:83116153-83254350	ENSG00000224918.1	AY269186.2.1	lncRNA	chr3:95030-96029	ENSG00000207549.1	MIR521-2	miRNA	chr19:54219847-54219934
ENSG00000183035.7	CYLC1	coding	chrX:83116153-83254350	ENSG00000229882.1	RP13-30A9.2.1	lncRNA	chr20:61265123-61267214	ENSG00000207551.1	MIR608	miRNA	chr10:102734741-102734841
ENSG00000183035.7	CYLC1	coding	chrX:83116153-83254350	ENSG00000229882.1	RP13-30A9.2.1	lncRNA	chr20:61265123-61267214	ENSG00000207549.1	MIR521-2	miRNA	chr19:54219847-54219934
ENSG00000183035.7	CYLC1	coding	chrX:83116153-83254350	ENSG00000227090.1	AP000402.3.1	lncRNA	chr21:26258989-26275070	ENSG00000207551.1	MIR608	miRNA	chr10:102734741-102734841
ENSG00000183035.7	CYLC1	coding	chrX:83116153-83254350	ENSG00000227090.1	AP000402.3.1	lncRNA	chr21:26258989-26275070	ENSG00000207549.1	MIR521-2	miRNA	chr19:54219847-54219934
ENSG00000183035.7	CYLC1	coding	chrX:83116153-83254350	ENSG00000230363.1	RP4-737A23.3.1	lncRNA	chr1:58343973-58346412	ENSG00000207992.1	MIR519A1	miRNA	chr19:54255650-54255735
ENSG00000183035.7	CYLC1	coding	chrX:83116153-83254350	ENSG00000230363.1	RP4-737A23.3.1	lncRNA	chr1:58343973-58346412	ENSG00000207549.1	MIR521-2	miRNA	chr19:54219847-54219934
ENSG00000183035.7	CYLC1	coding	chrX:83116153-83254350	ENSG00000237626.1	RP11-406A20.1.1	lncRNA	chr9:92740563-92749768	ENSG00000207992.1	MIR519A1	miRNA	chr19:54255650-54255735
ENSG00000183035.7	CYLC1	coding	chrX:83116153-83254350	ENSG00000228795.1	RP11-436F21.3.1	lncRNA	chr9:106006007-106015452	ENSG00000207992.1	MIR519A1	miRNA	chr19:54255650-54255735
ENSG00000183035.7	CYLC1	coding	chrX:83116153-83254350	ENSG00000228795.1	RP11-436F21.3.1	lncRNA	chr9:106006007-106015452	ENSG00000207551.1	MIR608	miRNA	chr10:102734741-102734841
ENSG00000183035.7	CYLC1	coding	chrX:83116153-83254350	ENSG00000228795.1	RP11-436F21.3.1	lncRNA	chr9:106006007-106015452	ENSG00000207549.1	MIR521-2	miRNA	chr19:54219847-54219934
ENSG00000183035.7	CYLC1	coding	chrX:83116153-83254350	ENSG00000229379.1	AC006041.1.1	lncRNA	chr7:15880921-15881985	ENSG00000207551.1	MIR608	miRNA	chr10:102734741-102734841
ENSG00000183035.7	CYLC1	coding	chrX:83116153-83254350	ENSG00000229379.1	AC006041.1.1	lncRNA	chr7:15880921-15881985	ENSG00000207549.1	MIR521-2	miRNA	chr19:54219847-54219934
ENSG00000183035.7	CYLC1	coding	chrX:83116153-83254350	ENSG00000253403.1	RP11-348M17.2.1	lncRNA	chr5:161114352-161116414	ENSG00000207992.1	MIR519A1	miRNA	chr19:54255650-54255735
ENSG00000183035.7	CYLC1	coding	chrX:83116153-83254350	ENSG00000253403.1	RP11-348M17.2.1	lncRNA	chr5:161114352-161116414	ENSG00000207551.1	MIR608	miRNA	chr10:102734741-102734841
ENSG00000183035.7	CYLC1	coding	chrX:83116153-83254350	ENSG00000253403.1	RP11-348M17.2.1	lncRNA	chr5:161114352-161116414	ENSG00000207549.1	MIR521-2	miRNA	chr19:54219847-54219934
ENSG00000183035.7	CYLC1	coding	chrX:83116153-83254350	ENSG00000224018.1	AP000470.2.1	lncRNA	chr21:25527483-25560655	ENSG00000207580.1	MIR526B	miRNA	chr19:54197646-54197729
ENSG00000183035.7	CYLC1	coding	chrX:83116153-83254350	ENSG00000231813.1	RP11-474I16.1.1	lncRNA	chr1:161607437-161608218	ENSG00000207992.1	MIR519A1	miRNA	chr19:54255650-54255735
ENSG00000183035.7	CYLC1	coding	chrX:83116153-83254350	ENSG00000224018.1	AP000470.2.1	lncRNA	chr21:25527483-25560655	ENSG00000207992.1	MIR519A1	miRNA	chr19:54255650-54255735
ENSG00000183035.7	CYLC1	coding	chrX:83116153-83254350	ENSG00000233689.1	RP11-123O1.1.1	lncRNA	chr7:68505138-68511790	ENSG00000207992.1	MIR519A1	miRNA	chr19:54255650-54255735
ENSG00000183035.7	CYLC1	coding	chrX:83116153-83254350	ENSG00000235464.1	AC007652.1.1	lncRNA	chr7:35535630-35549873	ENSG00000207992.1	MIR519A1	miRNA	chr19:54255650-54255735
ENSG00000183035.7	CYLC1	coding	chrX:83116153-83254350	ENSG00000258121.1	RP11-722P11.4.1	lncRNA	chr12:48877069-48894744	ENSG00000207992.1	MIR519A1	miRNA	chr19:54255650-54255735
ENSG00000183035.7	CYLC1	coding	chrX:83116153-83254350	ENSG00000249052.1	RP11-354O24.1.1	lncRNA	chr4:92809036-92825486	ENSG00000207992.1	MIR519A1	miRNA	chr19:54255650-54255735
ENSG00000183035.7	CYLC1	coding	chrX:83116153-83254350	ENSG00000215881.3	RP11-65D24.1.1	lncRNA	chr13:112248355-112294426	ENSG00000207551.1	MIR608	miRNA	chr10:102734741-102734841
ENSG00000183035.7	CYLC1	coding	chrX:83116153-83254350	ENSG00000254516.1	RP11-159D8.1.1	lncRNA	chr11:37960150-37976213	ENSG00000207551.1	MIR608	miRNA	chr10:102734741-102734841
ENSG00000183035.7	CYLC1	coding	chrX:83116153-83254350	ENSG00000233763.1	RP1-40E16.3.1	lncRNA	chr6:3051334-3053998	ENSG00000207551.1	MIR608	miRNA	chr10:102734741-102734841
ENSG00000183035.7	CYLC1	coding	chrX:83116153-83254350	ENSG00000259981.1	AF096876.1.1	lncRNA	chr21:31462034-31470154	ENSG00000207551.1	MIR608	miRNA	chr10:102734741-102734841
ENSG00000183035.7	CYLC1	coding	chrX:83116153-83254350	ENSG00000233689.1	RP11-123O1.1.1	lncRNA	chr7:68505138-68511790	ENSG00000207551.1	MIR608	miRNA	chr10:102734741-102734841
ENSG00000183035.7	CYLC1	coding	chrX:83116153-83254350	ENSG00000236889.1	RP11-38J22.1.1	lncRNA	chr1:206164083-206166270	ENSG00000207551.1	MIR608	miRNA	chr10:102734741-102734841
ENSG00000183035.7	CYLC1	coding	chrX:83116153-83254350	ENSG00000255808.1	RP11-31L22.3.1	lncRNA	chr11:72354280-72370451	ENSG00000207551.1	MIR608	miRNA	chr10:102734741-102734841
ENSG00000183035.7	CYLC1	coding	chrX:83116153-83254350	ENSG00000229755.1	RP5-827L5.2.1	lncRNA	chr20:59652279-59652872	ENSG00000207551.1	MIR608	miRNA	chr10:102734741-102734841
ENSG00000183035.7	CYLC1	coding	chrX:83116153-83254350	ENSG00000237031.1	AC008067.2.1	lncRNA	chr2:80802237-80843663	ENSG00000207551.1	MIR608	miRNA	chr10:102734741-102734841
ENSG00000183035.7	CYLC1	coding	chrX:83116153-83254350	ENSG00000251293.1	CTC-552D5.1.1	lncRNA	chr5:119581142-119669197	ENSG00000207551.1	MIR608	miRNA	chr10:102734741-102734841
ENSG00000183035.7	CYLC1	coding	chrX:83116153-83254350	ENSG00000259135.1	RP11-671J11.4.1	lncRNA	chr14:35025979-35030504	ENSG00000207551.1	MIR608	miRNA	chr10:102734741-102734841
ENSG00000183035.7	CYLC1	coding	chrX:83116153-83254350	ENSG00000234660.1	LINC00440	lncRNA	chr13:89925456-89932494	ENSG00000207551.1	MIR608	miRNA	chr10:102734741-102734841
ENSG00000183035.7	CYLC1	coding	chrX:83116153-83254350	ENSG00000231813.1	RP11-474I16.1.1	lncRNA	chr1:161607437-161608218	ENSG00000207549.1	MIR521-2	miRNA	chr19:54219847-54219934
ENSG00000183035.7	CYLC1	coding	chrX:83116153-83254350	ENSG00000223469.1	RP11-344J7.2.1	lncRNA	chr6:43819493-43820070	ENSG00000221493.1	MIR320C1	miRNA	chr18:19263470-19263558
ENSG00000183035.7	CYLC1	coding	chrX:83116153-83254350	ENSG00000224347.1	SCEL-AS1	lncRNA	chr13:78173889-78180686	ENSG00000198984.1	MIR345	miRNA	chr14:100774195-100774293
ENSG00000183035.7	CYLC1	coding	chrX:83116153-83254350	ENSG00000224347.1	SCEL-AS1	lncRNA	chr13:78173889-78180686	ENSG00000221493.1	MIR320C1	miRNA	chr18:19263470-19263558
ENSG00000183035.7	CYLC1	coding	chrX:83116153-83254350	ENSG00000224018.1	AP000470.2.1	lncRNA	chr21:25527483-25560655	ENSG00000207549.1	MIR521-2	miRNA	chr19:54219847-54219934
ENSG00000183035.7	CYLC1	coding	chrX:83116153-83254350	ENSG00000233689.1	RP11-123O1.1.1	lncRNA	chr7:68505138-68511790	ENSG00000207549.1	MIR521-2	miRNA	chr19:54219847-54219934
ENSG00000183035.7	CYLC1	coding	chrX:83116153-83254350	ENSG00000235464.1	AC007652.1.1	lncRNA	chr7:35535630-35549873	ENSG00000207549.1	MIR521-2	miRNA	chr19:54219847-54219934
ENSG00000183035.7	CYLC1	coding	chrX:83116153-83254350	ENSG00000258121.1	RP11-722P11.4.1	lncRNA	chr12:48877069-48894744	ENSG00000207549.1	MIR521-2	miRNA	chr19:54219847-54219934
ENSG00000183035.7	CYLC1	coding	chrX:83116153-83254350	ENSG00000233689.1	RP11-123O1.1.1	lncRNA	chr7:68505138-68511790	ENSG00000198984.1	MIR345	miRNA	chr14:100774195-100774293
ENSG00000183035.7	CYLC1	coding	chrX:83116153-83254350	ENSG00000257510.1	RP11-609L23.1.1	lncRNA	chr12:43009304-43040300	ENSG00000198984.1	MIR345	miRNA	chr14:100774195-100774293
ENSG00000183035.7	CYLC1	coding	chrX:83116153-83254350	ENSG00000236889.1	RP11-38J22.1.1	lncRNA	chr1:206164083-206166270	ENSG00000221333.1	MIR548K	miRNA	chr11:70130060-70130176
ENSG00000183035.7	CYLC1	coding	chrX:83116153-83254350	ENSG00000229755.1	RP5-827L5.2.1	lncRNA	chr20:59652279-59652872	ENSG00000221333.1	MIR548K	miRNA	chr11:70130060-70130176
ENSG00000147380.6	OPN1MW	coding	chrX:153448106-153461633	ENSG00000253682.1	RP11-700E23.2.1	lncRNA	chr8:93415772-93425873	ENSG00000199089.2	MIR202	miRNA	chr10:135061014-135061124
ENSG00000147380.6	OPN1MW	coding	chrX:153448106-153461633	ENSG00000231420.1	AC113610.1.1	lncRNA	chr2:151091405-151113521	ENSG00000199089.2	MIR202	miRNA	chr10:135061014-135061124
ENSG00000147380.6	OPN1MW	coding	chrX:153448106-153461633	ENSG00000261569.1	RP11-586K12.11.1	lncRNA	chr16:32660513-32675277	ENSG00000199089.2	MIR202	miRNA	chr10:135061014-135061124
ENSG00000147380.6	OPN1MW	coding	chrX:153448106-153461633	ENSG00000226716.1	AL589986.2.1	lncRNA	chr1:152095009-152097541	ENSG00000199089.2	MIR202	miRNA	chr10:135061014-135061124
ENSG00000147380.6	OPN1MW	coding	chrX:153448106-153461633	ENSG00000232184.1	RP11-370K11.1.1	lncRNA	chr1:243866158-243904123	ENSG00000199089.2	MIR202	miRNA	chr10:135061014-135061124
ENSG00000147380.6	OPN1MW	coding	chrX:153448106-153461633	ENSG00000224876.1	RP11-49G10.3.1	lncRNA	chr20:31802725-31804873	ENSG00000199089.2	MIR202	miRNA	chr10:135061014-135061124
ENSG00000147380.6	OPN1MW	coding	chrX:153448106-153461633	ENSG00000234542.1	RP11-282I1.2.1	lncRNA	chr10:125333742-125343283	ENSG00000199089.2	MIR202	miRNA	chr10:135061014-135061124
ENSG00000147380.6	OPN1MW	coding	chrX:153448106-153461633	ENSG00000234580.1	RP11-733D4.1.1	lncRNA	chr10:45086655-45097552	ENSG00000199089.2	MIR202	miRNA	chr10:135061014-135061124
ENSG00000147380.6	OPN1MW	coding	chrX:153448106-153461633	ENSG00000259620.1	RP11-133L19.1.1	lncRNA	chr15:87482027-87531657	ENSG00000199089.2	MIR202	miRNA	chr10:135061014-135061124
ENSG00000147380.6	OPN1MW	coding	chrX:153448106-153461633	ENSG00000254822.1	RP11-375D13.3.1	lncRNA	chr11:41898183-41898628	ENSG00000199089.2	MIR202	miRNA	chr10:135061014-135061124
ENSG00000147380.6	OPN1MW	coding	chrX:153448106-153461633	ENSG00000259237.1	RP11-209E8.1.1	lncRNA	chr15:53408561-53421895	ENSG00000199089.2	MIR202	miRNA	chr10:135061014-135061124
ENSG00000147380.6	OPN1MW	coding	chrX:153448106-153461633	ENSG00000261790.1	AC005606.14.1	lncRNA	chr16:2034877-2040358	ENSG00000221739.1	MIR1203	miRNA	chr17:46233788-46233873
ENSG00000147380.6	OPN1MW	coding	chrX:153448106-153461633	ENSG00000261790.1	AC005606.14.1	lncRNA	chr16:2034877-2040358	ENSG00000207981.1	MIR519D	miRNA	chr19:54216600-54216688
ENSG00000147380.6	OPN1MW	coding	chrX:153448106-153461633	ENSG00000224267.1	RP11-149F8.5.1	lncRNA	chr9:68324610-68340644	ENSG00000221739.1	MIR1203	miRNA	chr17:46233788-46233873
ENSG00000147380.6	OPN1MW	coding	chrX:153448106-153461633	ENSG00000224702.1	RP11-38C18.2.1	lncRNA	chr1:165179863-165182327	ENSG00000207784.1	MIR542	miRNA	chrX:133675370-133675467
ENSG00000147380.6	OPN1MW	coding	chrX:153448106-153461633	ENSG00000224702.1	RP11-38C18.2.1	lncRNA	chr1:165179863-165182327	ENSG00000207743.1	MIR495	miRNA	chr14:101500091-101500173
ENSG00000147380.6	OPN1MW	coding	chrX:153448106-153461633	ENSG00000223446.1	RP11-274J16.5.1	lncRNA	chr9:95857220-95857811	ENSG00000207784.1	MIR542	miRNA	chrX:133675370-133675467
ENSG00000147380.6	OPN1MW	coding	chrX:153448106-153461633	ENSG00000223446.1	RP11-274J16.5.1	lncRNA	chr9:95857220-95857811	ENSG00000207743.1	MIR495	miRNA	chr14:101500091-101500173
ENSG00000147380.6	OPN1MW	coding	chrX:153448106-153461633	ENSG00000225775.1	RP11-354I10.1.1	lncRNA	chr6:9124453-9162010	ENSG00000207784.1	MIR542	miRNA	chrX:133675370-133675467
ENSG00000147380.6	OPN1MW	coding	chrX:153448106-153461633	ENSG00000225818.1	AC118653.2.1	lncRNA	chr17:69592478-69593420	ENSG00000221739.1	MIR1203	miRNA	chr17:46233788-46233873
ENSG00000147380.6	OPN1MW	coding	chrX:153448106-153461633	ENSG00000256362.1	RP11-955H22.3.1	lncRNA	chr12:127808699-127824617	ENSG00000221739.1	MIR1203	miRNA	chr17:46233788-46233873
ENSG00000147380.6	OPN1MW	coding	chrX:153448106-153461633	ENSG00000231538.1	AC068542.1.1	lncRNA	chr2:115586008-115591125	ENSG00000221739.1	MIR1203	miRNA	chr17:46233788-46233873
ENSG00000147380.6	OPN1MW	coding	chrX:153448106-153461633	ENSG00000231243.1	RP11-134J21.1.1	lncRNA	chr3:38865392-38866793	ENSG00000221739.1	MIR1203	miRNA	chr17:46233788-46233873
ENSG00000147380.6	OPN1MW	coding	chrX:153448106-153461633	ENSG00000234542.1	RP11-282I1.2.1	lncRNA	chr10:125333742-125343283	ENSG00000221739.1	MIR1203	miRNA	chr17:46233788-46233873
ENSG00000147380.6	OPN1MW	coding	chrX:153448106-153461633	ENSG00000254822.1	RP11-375D13.3.1	lncRNA	chr11:41898183-41898628	ENSG00000221739.1	MIR1203	miRNA	chr17:46233788-46233873
ENSG00000147380.6	OPN1MW	coding	chrX:153448106-153461633	ENSG00000257603.1	RP11-100F15.1.1	lncRNA	chr12:114514937-114517707	ENSG00000221739.1	MIR1203	miRNA	chr17:46233788-46233873
ENSG00000147380.6	OPN1MW	coding	chrX:153448106-153461633	ENSG00000227169.1	RP1-37J18.1.1	lncRNA	chr1:4611794-4612205	ENSG00000207784.1	MIR542	miRNA	chrX:133675370-133675467
ENSG00000147380.6	OPN1MW	coding	chrX:153448106-153461633	ENSG00000227169.1	RP1-37J18.1.1	lncRNA	chr1:4611794-4612205	ENSG00000207743.1	MIR495	miRNA	chr14:101500091-101500173
ENSG00000147380.6	OPN1MW	coding	chrX:153448106-153461633	ENSG00000231538.1	AC068542.1.1	lncRNA	chr2:115586008-115591125	ENSG00000211582.1	MIR758	miRNA	chr14:101492356-101492444
ENSG00000147380.6	OPN1MW	coding	chrX:153448106-153461633	ENSG00000225316.1	LINC00350	lncRNA	chr13:20161257-20162490	ENSG00000207784.1	MIR542	miRNA	chrX:133675370-133675467
ENSG00000147380.6	OPN1MW	coding	chrX:153448106-153461633	ENSG00000224661.1	AC010907.5.1	lncRNA	chr2:3750174-3751743	ENSG00000207784.1	MIR542	miRNA	chrX:133675370-133675467
ENSG00000147380.6	OPN1MW	coding	chrX:153448106-153461633	ENSG00000234104.1	RP5-1177M21.1.1	lncRNA	chr20:20951088-20953203	ENSG00000207784.1	MIR542	miRNA	chrX:133675370-133675467
ENSG00000147380.6	OPN1MW	coding	chrX:153448106-153461633	ENSG00000234279.1	AC113618.1.1	lncRNA	chr2:239628964-239649421	ENSG00000207784.1	MIR542	miRNA	chrX:133675370-133675467
ENSG00000147380.6	OPN1MW	coding	chrX:153448106-153461633	ENSG00000227611.1	RP11-168G22.3.1	lncRNA	chr13:62895437-62896531	ENSG00000207784.1	MIR542	miRNA	chrX:133675370-133675467
ENSG00000147380.6	OPN1MW	coding	chrX:153448106-153461633	ENSG00000225316.1	LINC00350	lncRNA	chr13:20161257-20162490	ENSG00000221296.1	MIR548T	miRNA	chr4:174189304-174189386
ENSG00000147380.6	OPN1MW	coding	chrX:153448106-153461633	ENSG00000239664.1	RP5-857K21.3.1	lncRNA	chr1:529832-532878	ENSG00000221296.1	MIR548T	miRNA	chr4:174189304-174189386
ENSG00000147380.6	OPN1MW	coding	chrX:153448106-153461633	ENSG00000228482.1	RP5-859D4.3.1	lncRNA	chr20:6711904-6716783	ENSG00000221296.1	MIR548T	miRNA	chr4:174189304-174189386
ENSG00000147380.6	OPN1MW	coding	chrX:153448106-153461633	ENSG00000204990.3	RP5-842K16.1.1	lncRNA	chr7:141114182-141116190	ENSG00000221296.1	MIR548T	miRNA	chr4:174189304-174189386
ENSG00000147380.6	OPN1MW	coding	chrX:153448106-153461633	ENSG00000238194.1	RP4-719C8.1.1	lncRNA	chr20:58201518-58203344	ENSG00000221296.1	MIR548T	miRNA	chr4:174189304-174189386
ENSG00000147380.6	OPN1MW	coding	chrX:153448106-153461633	ENSG00000226715.1	RP11-411H5.1.1	lncRNA	chr1:102189297-102195170	ENSG00000221296.1	MIR548T	miRNA	chr4:174189304-174189386
ENSG00000147380.6	OPN1MW	coding	chrX:153448106-153461633	ENSG00000225316.1	LINC00350	lncRNA	chr13:20161257-20162490	ENSG00000207589.1	MIR508	miRNA	chrX:146318430-146318545
ENSG00000147380.6	OPN1MW	coding	chrX:153448106-153461633	ENSG00000255427.1	RP11-350D17.2.1	lncRNA	chr11:34592422-34595529	ENSG00000207589.1	MIR508	miRNA	chrX:146318430-146318545
ENSG00000147380.6	OPN1MW	coding	chrX:153448106-153461633	ENSG00000234384.1	RP11-158A8.1.1	lncRNA	chr13:91145540-91187334	ENSG00000207589.1	MIR508	miRNA	chrX:146318430-146318545
ENSG00000147380.6	OPN1MW	coding	chrX:153448106-153461633	ENSG00000258280.1	RP11-1028N23.2.1	lncRNA	chr12:116014480-116015420	ENSG00000207589.1	MIR508	miRNA	chrX:146318430-146318545
ENSG00000147380.6	OPN1MW	coding	chrX:153448106-153461633	ENSG00000225316.1	LINC00350	lncRNA	chr13:20161257-20162490	ENSG00000207743.1	MIR495	miRNA	chr14:101500091-101500173
ENSG00000147380.6	OPN1MW	coding	chrX:153448106-153461633	ENSG00000224661.1	AC010907.5.1	lncRNA	chr2:3750174-3751743	ENSG00000207743.1	MIR495	miRNA	chr14:101500091-101500173
ENSG00000147380.6	OPN1MW	coding	chrX:153448106-153461633	ENSG00000234384.1	RP11-158A8.1.1	lncRNA	chr13:91145540-91187334	ENSG00000207743.1	MIR495	miRNA	chr14:101500091-101500173
ENSG00000147380.6	OPN1MW	coding	chrX:153448106-153461633	ENSG00000227332.1	LINC00419	lncRNA	chr13:19433966-19434882	ENSG00000207743.1	MIR495	miRNA	chr14:101500091-101500173
ENSG00000147380.6	OPN1MW	coding	chrX:153448106-153461633	ENSG00000232184.1	RP11-370K11.1.1	lncRNA	chr1:243866158-243904123	ENSG00000207743.1	MIR495	miRNA	chr14:101500091-101500173
ENSG00000147380.6	OPN1MW	coding	chrX:153448106-153461633	ENSG00000249290.1	RP11-68L1.2.1	lncRNA	chr3:140168276-140179193	ENSG00000207743.1	MIR495	miRNA	chr14:101500091-101500173
ENSG00000147380.6	OPN1MW	coding	chrX:153448106-153461633	ENSG00000259237.1	RP11-209E8.1.1	lncRNA	chr15:53408561-53421895	ENSG00000207743.1	MIR495	miRNA	chr14:101500091-101500173
ENSG00000147380.6	OPN1MW	coding	chrX:153448106-153461633	ENSG00000224876.1	RP11-49G10.3.1	lncRNA	chr20:31802725-31804873	ENSG00000207935.1	MIR204	miRNA	chr9:73424890-73425000
ENSG00000147380.6	OPN1MW	coding	chrX:153448106-153461633	ENSG00000258272.1	RP11-510I5.1.1	lncRNA	chr12:96816103-96879220	ENSG00000207981.1	MIR519D	miRNA	chr19:54216600-54216688
ENSG00000147380.6	OPN1MW	coding	chrX:153448106-153461633	ENSG00000259237.1	RP11-209E8.1.1	lncRNA	chr15:53408561-53421895	ENSG00000207981.1	MIR519D	miRNA	chr19:54216600-54216688
ENSG00000131002.6	CYorf15B.1	coding	chrY:21752638-21768160	ENSG00000254580.1	RP11-677I18.4.1	lncRNA	chr11:105983185-106002843	ENSG00000207732.1	MIR218-1	miRNA	chr4:20529897-20530007
ENSG00000131002.6	CYorf15B.1	coding	chrY:21752638-21768160	ENSG00000259720.1	RP11-348B17.1.1	lncRNA	chr15:31294215-31334505	ENSG00000207775.1	MIR548A1	miRNA	chr6:18572014-18572111
ENSG00000131002.6	CYorf15B.1	coding	chrY:21752638-21768160	ENSG00000259720.1	RP11-348B17.1.1	lncRNA	chr15:31294215-31334505	ENSG00000207732.1	MIR218-1	miRNA	chr4:20529897-20530007
ENSG00000131002.6	CYorf15B.1	coding	chrY:21752638-21768160	ENSG00000249152.1	RP11-562F9.2.1	lncRNA	chr4:93189917-93198226	ENSG00000207656.1	MIR489	miRNA	chr7:93113247-93113331
ENSG00000131002.6	CYorf15B.1	coding	chrY:21752638-21768160	ENSG00000249490.1	CTD-2333M24.1.1	lncRNA	chr5:20612733-20614874	ENSG00000207656.1	MIR489	miRNA	chr7:93113247-93113331
ENSG00000131002.6	CYorf15B.1	coding	chrY:21752638-21768160	ENSG00000258637.1	RP11-242P2.1.1	lncRNA	chr14:80128008-80257606	ENSG00000207656.1	MIR489	miRNA	chr7:93113247-93113331
ENSG00000131002.6	CYorf15B.1	coding	chrY:21752638-21768160	ENSG00000234918.1	RP11-20F24.2.1	lncRNA	chr10:37529814-37530977	ENSG00000207656.1	MIR489	miRNA	chr7:93113247-93113331
ENSG00000131002.6	CYorf15B.1	coding	chrY:21752638-21768160	ENSG00000232624.1	RP11-478H13.3.1	lncRNA	chr10:29095875-29097148	ENSG00000207656.1	MIR489	miRNA	chr7:93113247-93113331
ENSG00000131002.6	CYorf15B.1	coding	chrY:21752638-21768160	ENSG00000251670.1	CTD-2532K18.1.1	lncRNA	chr5:174178306-174277728	ENSG00000207656.1	MIR489	miRNA	chr7:93113247-93113331
ENSG00000131002.6	CYorf15B.1	coding	chrY:21752638-21768160	ENSG00000255169.1	RP11-646J21.3.1	lncRNA	chr11:33826313-33827187	ENSG00000207656.1	MIR489	miRNA	chr7:93113247-93113331
ENSG00000131002.6	CYorf15B.1	coding	chrY:21752638-21768160	ENSG00000244471.1	RP11-78J21.4.1	lncRNA	chr13:53063127-53073440	ENSG00000207656.1	MIR489	miRNA	chr7:93113247-93113331
ENSG00000131002.6	CYorf15B.1	coding	chrY:21752638-21768160	ENSG00000229578.1	LINC00358	lncRNA	chr13:62578225-62603681	ENSG00000207656.1	MIR489	miRNA	chr7:93113247-93113331
ENSG00000131002.6	CYorf15B.1	coding	chrY:21752638-21768160	ENSG00000250150.1	RP11-436A7.1.1	lncRNA	chr4:168228060-168229940	ENSG00000207656.1	MIR489	miRNA	chr7:93113247-93113331
ENSG00000131002.6	CYorf15B.1	coding	chrY:21752638-21768160	ENSG00000249152.1	RP11-562F9.2.1	lncRNA	chr4:93189917-93198226	ENSG00000207775.1	MIR548A1	miRNA	chr6:18572014-18572111
ENSG00000131002.6	CYorf15B.1	coding	chrY:21752638-21768160	ENSG00000170590.4	LINC00266-3	lncRNA	chr6:131909-144885	ENSG00000207775.1	MIR548A1	miRNA	chr6:18572014-18572111
ENSG00000131002.6	CYorf15B.1	coding	chrY:21752638-21768160	ENSG00000257523.1	CTD-2384A14.2.1	lncRNA	chr14:29445041-29448130	ENSG00000207813.1	MIR605	miRNA	chr10:53059332-53059415
ENSG00000131002.6	CYorf15B.1	coding	chrY:21752638-21768160	ENSG00000251527.1	RP11-51P8.1.1	lncRNA	chr4:66724478-66725922	ENSG00000253030.1	MIR2116	miRNA	chr15:59463381-59463461
ENSG00000131002.6	CYorf15B.1	coding	chrY:21752638-21768160	ENSG00000234918.1	RP11-20F24.2.1	lncRNA	chr10:37529814-37530977	ENSG00000253030.1	MIR2116	miRNA	chr15:59463381-59463461
ENSG00000131002.6	CYorf15B.1	coding	chrY:21752638-21768160	ENSG00000230492.1	RP4-753D10.5.1	lncRNA	chr20:22990845-23011422	ENSG00000253030.1	MIR2116	miRNA	chr15:59463381-59463461
ENSG00000131002.6	CYorf15B.1	coding	chrY:21752638-21768160	ENSG00000254562.1	RP11-64I17.1.1	lncRNA	chr11:38668025-38695791	ENSG00000253030.1	MIR2116	miRNA	chr15:59463381-59463461
ENSG00000131002.6	CYorf15B.1	coding	chrY:21752638-21768160	ENSG00000257787.1	RP11-20L19.1.1	lncRNA	chr12:91203052-91204457	ENSG00000253030.1	MIR2116	miRNA	chr15:59463381-59463461
ENSG00000131002.6	CYorf15B.1	coding	chrY:21752638-21768160	ENSG00000223880.1	RP11-159J2.2.1	lncRNA	chr13:75824615-75826148	ENSG00000207732.1	MIR218-1	miRNA	chr4:20529897-20530007
ENSG00000131002.6	CYorf15B.1	coding	chrY:21752638-21768160	ENSG00000229084.1	LINC00226	lncRNA	chr14:106744268-106744966	ENSG00000207732.1	MIR218-1	miRNA	chr4:20529897-20530007
ENSG00000131002.6	CYorf15B.1	coding	chrY:21752638-21768160	ENSG00000229779.1	AC016751.2.1	lncRNA	chr2:176769098-176770230	ENSG00000207732.1	MIR218-1	miRNA	chr4:20529897-20530007
ENSG00000131002.6	CYorf15B.1	coding	chrY:21752638-21768160	ENSG00000254361.1	RP11-238K6.2.1	lncRNA	chr8:138864569-138941287	ENSG00000207732.1	MIR218-1	miRNA	chr4:20529897-20530007
ENSG00000131002.6	CYorf15B.1	coding	chrY:21752638-21768160	ENSG00000170590.4	LINC00266-3	lncRNA	chr6:131909-144885	ENSG00000207732.1	MIR218-1	miRNA	chr4:20529897-20530007
ENSG00000131002.6	CYorf15B.1	coding	chrY:21752638-21768160	ENSG00000170590.4	LINC00266-3	lncRNA	chr6:131909-144885	ENSG00000207838.1	MIR517C	miRNA	chr19:54244566-54244661
ENSG00000131002.6	CYorf15B.1	coding	chrY:21752638-21768160	ENSG00000255323.1	CTD-2140G10.1.1	lncRNA	chr11:22467233-22513565	ENSG00000207732.1	MIR218-1	miRNA	chr4:20529897-20530007
ENSG00000131002.6	CYorf15B.1	coding	chrY:21752638-21768160	ENSG00000251527.1	RP11-51P8.1.1	lncRNA	chr4:66724478-66725922	ENSG00000207732.1	MIR218-1	miRNA	chr4:20529897-20530007
ENSG00000131002.6	CYorf15B.1	coding	chrY:21752638-21768160	ENSG00000234918.1	RP11-20F24.2.1	lncRNA	chr10:37529814-37530977	ENSG00000207732.1	MIR218-1	miRNA	chr4:20529897-20530007
ENSG00000131002.6	CYorf15B.1	coding	chrY:21752638-21768160	ENSG00000225299.1	RP11-344A5.1.1	lncRNA	chr10:68812366-68814786	ENSG00000207732.1	MIR218-1	miRNA	chr4:20529897-20530007
ENSG00000131002.6	CYorf15B.1	coding	chrY:21752638-21768160	ENSG00000230492.1	RP4-753D10.5.1	lncRNA	chr20:22990845-23011422	ENSG00000207732.1	MIR218-1	miRNA	chr4:20529897-20530007
ENSG00000131002.6	CYorf15B.1	coding	chrY:21752638-21768160	ENSG00000244321.1	RP11-450H5.1.1	lncRNA	chr3:166287480-166288551	ENSG00000207732.1	MIR218-1	miRNA	chr4:20529897-20530007
ENSG00000131002.6	CYorf15B.1	coding	chrY:21752638-21768160	ENSG00000254562.1	RP11-64I17.1.1	lncRNA	chr11:38668025-38695791	ENSG00000207732.1	MIR218-1	miRNA	chr4:20529897-20530007
ENSG00000131002.6	CYorf15B.1	coding	chrY:21752638-21768160	ENSG00000251670.1	CTD-2532K18.1.1	lncRNA	chr5:174178306-174277728	ENSG00000207732.1	MIR218-1	miRNA	chr4:20529897-20530007
ENSG00000131002.6	CYorf15B.1	coding	chrY:21752638-21768160	ENSG00000257429.1	RP11-272K23.3.1	lncRNA	chr12:80977461-80987480	ENSG00000207732.1	MIR218-1	miRNA	chr4:20529897-20530007
ENSG00000131002.6	CYorf15B.1	coding	chrY:21752638-21768160	ENSG00000259553.1	AC140725.4.1	lncRNA	chr15:102500050-102501611	ENSG00000207732.1	MIR218-1	miRNA	chr4:20529897-20530007
ENSG00000131002.6	CYorf15B.1	coding	chrY:21752638-21768160	ENSG00000234653.1	AC079117.1.1	lncRNA	chr2:77213090-77236917	ENSG00000207732.1	MIR218-1	miRNA	chr4:20529897-20530007
ENSG00000204480.5	PRAMEF19	coding	chr1:13694888-13698405	ENSG00000251276.1	MAGI2-AS1	lncRNA	chr7:78569165-78570211	ENSG00000221296.1	MIR548T	miRNA	chr4:174189304-174189386
ENSG00000211879.1	TRAJ10	coding	chr14:23002444-23002508	ENSG00000251276.1	MAGI2-AS1	lncRNA	chr7:78569165-78570211	ENSG00000207633.1	MIR505	miRNA	chrX:139006306-139006390
ENSG00000211879.1	TRAJ10	coding	chr14:23002444-23002508	ENSG00000251276.1	MAGI2-AS1	lncRNA	chr7:78569165-78570211	ENSG00000221296.1	MIR548T	miRNA	chr4:174189304-174189386
ENSG00000211879.1	TRAJ10	coding	chr14:23002444-23002508	ENSG00000251276.1	MAGI2-AS1	lncRNA	chr7:78569165-78570211	ENSG00000207577.1	MIR587	miRNA	chr6:107231999-107232095
ENSG00000211879.1	TRAJ10	coding	chr14:23002444-23002508	ENSG00000251276.1	MAGI2-AS1	lncRNA	chr7:78569165-78570211	ENSG00000207609.1	MIR491	miRNA	chr9:20716103-20716187
ENSG00000181761.5	OR8H3	coding	chr11:55889848-55890787	ENSG00000251276.1	MAGI2-AS1	lncRNA	chr7:78569165-78570211	ENSG00000207633.1	MIR505	miRNA	chrX:139006306-139006390
ENSG00000257962.1	RP11-219B4.6.1	coding	chr8:86158523-86162077	ENSG00000251276.1	MAGI2-AS1	lncRNA	chr7:78569165-78570211	ENSG00000199150.1	MIRLET7G	miRNA	chr3:52302291-52302379
ENSG00000167825.3	OR5I1	coding	chr11:55702931-55703876	ENSG00000251276.1	MAGI2-AS1	lncRNA	chr7:78569165-78570211	ENSG00000207577.1	MIR587	miRNA	chr6:107231999-107232095
ENSG00000181761.5	OR8H3	coding	chr11:55889848-55890787	ENSG00000251276.1	MAGI2-AS1	lncRNA	chr7:78569165-78570211	ENSG00000207577.1	MIR587	miRNA	chr6:107231999-107232095
ENSG00000181761.5	OR8H3	coding	chr11:55889848-55890787	ENSG00000251276.1	MAGI2-AS1	lncRNA	chr7:78569165-78570211	ENSG00000207609.1	MIR491	miRNA	chr9:20716103-20716187
ENSG00000124227.4	ANKRD60	coding	chr20:56793550-56803709	ENSG00000231774.1	RP11-402P6.11.1	lncRNA	chrX:70980624-70981509	ENSG00000199082.1	MIR342	miRNA	chr14:100575991-100576090
ENSG00000124227.4	ANKRD60	coding	chr20:56793550-56803709	ENSG00000248736.1	RP11-35O7.1.1	lncRNA	chr5:2965119-2967742	ENSG00000199082.1	MIR342	miRNA	chr14:100575991-100576090
ENSG00000124227.4	ANKRD60	coding	chr20:56793550-56803709	ENSG00000248736.1	RP11-35O7.1.1	lncRNA	chr5:2965119-2967742	ENSG00000207743.1	MIR495	miRNA	chr14:101500091-101500173
ENSG00000124227.4	ANKRD60	coding	chr20:56793550-56803709	ENSG00000233997.1	AP000475.2.1	lncRNA	chr21:23119292-23169735	ENSG00000221522.1	MIR548AC	miRNA	chr4:104343256-104343353
ENSG00000124227.4	ANKRD60	coding	chr20:56793550-56803709	ENSG00000254357.1	RP11-628E19.2.1	lncRNA	chr8:56429798-56433536	ENSG00000207743.1	MIR495	miRNA	chr14:101500091-101500173
ENSG00000124227.4	ANKRD60	coding	chr20:56793550-56803709	ENSG00000248425.1	AC006296.2.1	lncRNA	chr4:14392062-14395616	ENSG00000221522.1	MIR548AC	miRNA	chr4:104343256-104343353
ENSG00000124227.4	ANKRD60	coding	chr20:56793550-56803709	ENSG00000248425.1	AC006296.2.1	lncRNA	chr4:14392062-14395616	ENSG00000251856.1	MIR449C	miRNA	chr5:54468089-54468181
ENSG00000124227.4	ANKRD60	coding	chr20:56793550-56803709	ENSG00000261790.1	AC005606.14.1	lncRNA	chr16:2034877-2040358	ENSG00000251856.1	MIR449C	miRNA	chr5:54468089-54468181
ENSG00000124227.4	ANKRD60	coding	chr20:56793550-56803709	ENSG00000244968.2	LIFR-AS1	lncRNA	chr5:38556887-38671318	ENSG00000221430.1	MIR1294	miRNA	chr5:153726665-153726807
ENSG00000124227.4	ANKRD60	coding	chr20:56793550-56803709	ENSG00000238277.1	AC068483.1.1	lncRNA	chr2:129821418-129829298	ENSG00000211991.1	MIR676	miRNA	chrX:69242699-69242783
ENSG00000124227.4	ANKRD60	coding	chr20:56793550-56803709	ENSG00000254130.1	CTB-7E3.1.1	lncRNA	chr5:166332226-166353375	ENSG00000211991.1	MIR676	miRNA	chrX:69242699-69242783
ENSG00000124227.4	ANKRD60	coding	chr20:56793550-56803709	ENSG00000232436.1	RP11-103C3.1.1	lncRNA	chr1:221681900-221684321	ENSG00000211991.1	MIR676	miRNA	chrX:69242699-69242783
ENSG00000124227.4	ANKRD60	coding	chr20:56793550-56803709	ENSG00000236914.3	RP11-1008C21.2.1	lncRNA	chr15:38361681-38365160	ENSG00000199082.1	MIR342	miRNA	chr14:100575991-100576090
ENSG00000124227.4	ANKRD60	coding	chr20:56793550-56803709	ENSG00000224918.1	AY269186.2.1	lncRNA	chr3:95030-96029	ENSG00000221522.1	MIR548AC	miRNA	chr4:104343256-104343353
ENSG00000124227.4	ANKRD60	coding	chr20:56793550-56803709	ENSG00000198671.2	RP11-168J19.2.1	lncRNA	chr12:65411247-65413586	ENSG00000221522.1	MIR548AC	miRNA	chr4:104343256-104343353
ENSG00000124227.4	ANKRD60	coding	chr20:56793550-56803709	ENSG00000224582.1	DAQB-12N14.5.2	lncRNA	chr6:29497196-29501345	ENSG00000221522.1	MIR548AC	miRNA	chr4:104343256-104343353
ENSG00000124227.4	ANKRD60	coding	chr20:56793550-56803709	ENSG00000261313.1	RP11-2C15.1.1	lncRNA	chr16:75872527-75894765	ENSG00000221522.1	MIR548AC	miRNA	chr4:104343256-104343353
ENSG00000124227.4	ANKRD60	coding	chr20:56793550-56803709	ENSG00000232394.1	AC090696.2.1	lncRNA	chr15:28020766-28021944	ENSG00000221522.1	MIR548AC	miRNA	chr4:104343256-104343353
ENSG00000124227.4	ANKRD60	coding	chr20:56793550-56803709	ENSG00000225050.1	RP11-349E4.1.1	lncRNA	chr9:121450029-121468238	ENSG00000221522.1	MIR548AC	miRNA	chr4:104343256-104343353
ENSG00000124227.4	ANKRD60	coding	chr20:56793550-56803709	ENSG00000241754.1	RP11-280H21.1.1	lncRNA	chr3:102382006-102392757	ENSG00000221522.1	MIR548AC	miRNA	chr4:104343256-104343353
ENSG00000124227.4	ANKRD60	coding	chr20:56793550-56803709	ENSG00000233981.1	RP3-380E11.2.1	lncRNA	chr6:14005150-14007132	ENSG00000221522.1	MIR548AC	miRNA	chr4:104343256-104343353
ENSG00000124227.4	ANKRD60	coding	chr20:56793550-56803709	ENSG00000234238.1	RP11-430L16.1.1	lncRNA	chr3:187824883-187864808	ENSG00000221522.1	MIR548AC	miRNA	chr4:104343256-104343353
ENSG00000124227.4	ANKRD60	coding	chr20:56793550-56803709	ENSG00000257522.1	RP11-562L8.1.1	lncRNA	chr14:29734030-29850501	ENSG00000221522.1	MIR548AC	miRNA	chr4:104343256-104343353
ENSG00000124227.4	ANKRD60	coding	chr20:56793550-56803709	ENSG00000235782.1	RP3-333A15.1.1	lncRNA	chr1:71413061-71417176	ENSG00000221522.1	MIR548AC	miRNA	chr4:104343256-104343353
ENSG00000124227.4	ANKRD60	coding	chr20:56793550-56803709	ENSG00000226640.1	RP11-21J7.1.1	lncRNA	chr1:193648023-193696313	ENSG00000221522.1	MIR548AC	miRNA	chr4:104343256-104343353
ENSG00000124227.4	ANKRD60	coding	chr20:56793550-56803709	ENSG00000254067.1	RP11-122L4.1.1	lncRNA	chr8:39413664-39416052	ENSG00000221522.1	MIR548AC	miRNA	chr4:104343256-104343353
ENSG00000124227.4	ANKRD60	coding	chr20:56793550-56803709	ENSG00000227075.1	AP000472.3.1	lncRNA	chr21:23305634-23348000	ENSG00000207775.1	MIR548A1	miRNA	chr6:18572014-18572111
ENSG00000124227.4	ANKRD60	coding	chr20:56793550-56803709	ENSG00000253267.1	RP11-666I19.2.1	lncRNA	chr8:1513674-1570583	ENSG00000207775.1	MIR548A1	miRNA	chr6:18572014-18572111
ENSG00000124227.4	ANKRD60	coding	chr20:56793550-56803709	ENSG00000227223.1	RP11-23O13.1.1	lncRNA	chr20:20702316-20703034	ENSG00000199082.1	MIR342	miRNA	chr14:100575991-100576090
ENSG00000124227.4	ANKRD60	coding	chr20:56793550-56803709	ENSG00000198671.2	RP11-168J19.2.1	lncRNA	chr12:65411247-65413586	ENSG00000221430.1	MIR1294	miRNA	chr5:153726665-153726807
ENSG00000124227.4	ANKRD60	coding	chr20:56793550-56803709	ENSG00000233981.1	RP3-380E11.2.1	lncRNA	chr6:14005150-14007132	ENSG00000221430.1	MIR1294	miRNA	chr5:153726665-153726807
ENSG00000124227.4	ANKRD60	coding	chr20:56793550-56803709	ENSG00000224918.1	AY269186.2.1	lncRNA	chr3:95030-96029	ENSG00000199082.1	MIR342	miRNA	chr14:100575991-100576090
ENSG00000124227.4	ANKRD60	coding	chr20:56793550-56803709	ENSG00000227090.1	AP000402.3.1	lncRNA	chr21:26258989-26275070	ENSG00000199082.1	MIR342	miRNA	chr14:100575991-100576090
ENSG00000124227.4	ANKRD60	coding	chr20:56793550-56803709	ENSG00000228795.1	RP11-436F21.3.1	lncRNA	chr9:106006007-106015452	ENSG00000199082.1	MIR342	miRNA	chr14:100575991-100576090
ENSG00000124227.4	ANKRD60	coding	chr20:56793550-56803709	ENSG00000228795.1	RP11-436F21.3.1	lncRNA	chr9:106006007-106015452	ENSG00000207743.1	MIR495	miRNA	chr14:101500091-101500173
ENSG00000124227.4	ANKRD60	coding	chr20:56793550-56803709	ENSG00000229379.1	AC006041.1.1	lncRNA	chr7:15880921-15881985	ENSG00000199082.1	MIR342	miRNA	chr14:100575991-100576090
ENSG00000124227.4	ANKRD60	coding	chr20:56793550-56803709	ENSG00000229379.1	AC006041.1.1	lncRNA	chr7:15880921-15881985	ENSG00000251856.1	MIR449C	miRNA	chr5:54468089-54468181
ENSG00000124227.4	ANKRD60	coding	chr20:56793550-56803709	ENSG00000253403.1	RP11-348M17.2.1	lncRNA	chr5:161114352-161116414	ENSG00000199082.1	MIR342	miRNA	chr14:100575991-100576090
ENSG00000124227.4	ANKRD60	coding	chr20:56793550-56803709	ENSG00000231266.1	AC010745.3.1	lncRNA	chr2:16408294-16409462	ENSG00000199082.1	MIR342	miRNA	chr14:100575991-100576090
ENSG00000124227.4	ANKRD60	coding	chr20:56793550-56803709	ENSG00000223393.1	RP5-858B6.3.1	lncRNA	chr1:231010591-231014761	ENSG00000199082.1	MIR342	miRNA	chr14:100575991-100576090
ENSG00000124227.4	ANKRD60	coding	chr20:56793550-56803709	ENSG00000228338.1	RP5-845O24.8.1	lncRNA	chr1:12882548-12883022	ENSG00000199082.1	MIR342	miRNA	chr14:100575991-100576090
ENSG00000124227.4	ANKRD60	coding	chr20:56793550-56803709	ENSG00000231510.1	RP11-542C10.1.1	lncRNA	chr1:5146518-5150959	ENSG00000199082.1	MIR342	miRNA	chr14:100575991-100576090
ENSG00000124227.4	ANKRD60	coding	chr20:56793550-56803709	ENSG00000255411.1	RP11-98J9.1.1	lncRNA	chr11:13806936-13869549	ENSG00000199082.1	MIR342	miRNA	chr14:100575991-100576090
ENSG00000124227.4	ANKRD60	coding	chr20:56793550-56803709	ENSG00000236283.1	AC013463.2.1	lncRNA	chr2:165848493-165947803	ENSG00000199082.1	MIR342	miRNA	chr14:100575991-100576090
ENSG00000124227.4	ANKRD60	coding	chr20:56793550-56803709	ENSG00000254130.1	CTB-7E3.1.1	lncRNA	chr5:166332226-166353375	ENSG00000199082.1	MIR342	miRNA	chr14:100575991-100576090
ENSG00000124227.4	ANKRD60	coding	chr20:56793550-56803709	ENSG00000227075.1	AP000472.3.1	lncRNA	chr21:23305634-23348000	ENSG00000199082.1	MIR342	miRNA	chr14:100575991-100576090
ENSG00000124227.4	ANKRD60	coding	chr20:56793550-56803709	ENSG00000251488.1	RP11-404I7.2.1	lncRNA	chr4:133757926-133902832	ENSG00000199082.1	MIR342	miRNA	chr14:100575991-100576090
ENSG00000124227.4	ANKRD60	coding	chr20:56793550-56803709	ENSG00000206062.4	RP13-212L9.1.1	lncRNA	chrX:90562779-90563877	ENSG00000199082.1	MIR342	miRNA	chr14:100575991-100576090
ENSG00000124227.4	ANKRD60	coding	chr20:56793550-56803709	ENSG00000254698.1	RP11-659G9.3.1	lncRNA	chr11:82674722-82750157	ENSG00000199082.1	MIR342	miRNA	chr14:100575991-100576090
ENSG00000124227.4	ANKRD60	coding	chr20:56793550-56803709	ENSG00000232436.1	RP11-103C3.1.1	lncRNA	chr1:221681900-221684321	ENSG00000199082.1	MIR342	miRNA	chr14:100575991-100576090
ENSG00000124227.4	ANKRD60	coding	chr20:56793550-56803709	ENSG00000253267.1	RP11-666I19.2.1	lncRNA	chr8:1513674-1570583	ENSG00000199082.1	MIR342	miRNA	chr14:100575991-100576090
ENSG00000124227.4	ANKRD60	coding	chr20:56793550-56803709	ENSG00000236885.1	AC018731.3.1	lncRNA	chr2:151974468-152042723	ENSG00000199082.1	MIR342	miRNA	chr14:100575991-100576090
ENSG00000124227.4	ANKRD60	coding	chr20:56793550-56803709	ENSG00000257787.1	RP11-20L19.1.1	lncRNA	chr12:91203052-91204457	ENSG00000207589.1	MIR508	miRNA	chrX:146318430-146318545
ENSG00000124227.4	ANKRD60	coding	chr20:56793550-56803709	ENSG00000232436.1	RP11-103C3.1.1	lncRNA	chr1:221681900-221684321	ENSG00000207589.1	MIR508	miRNA	chrX:146318430-146318545
ENSG00000124227.4	ANKRD60	coding	chr20:56793550-56803709	ENSG00000231510.1	RP11-542C10.1.1	lncRNA	chr1:5146518-5150959	ENSG00000207743.1	MIR495	miRNA	chr14:101500091-101500173
ENSG00000124227.4	ANKRD60	coding	chr20:56793550-56803709	ENSG00000255411.1	RP11-98J9.1.1	lncRNA	chr11:13806936-13869549	ENSG00000207743.1	MIR495	miRNA	chr14:101500091-101500173
ENSG00000124227.4	ANKRD60	coding	chr20:56793550-56803709	ENSG00000227185.1	RP11-544D21.1.1	lncRNA	chr1:239433024-239461237	ENSG00000207743.1	MIR495	miRNA	chr14:101500091-101500173
ENSG00000124227.4	ANKRD60	coding	chr20:56793550-56803709	ENSG00000206062.4	RP13-212L9.1.1	lncRNA	chrX:90562779-90563877	ENSG00000207743.1	MIR495	miRNA	chr14:101500091-101500173
ENSG00000124227.4	ANKRD60	coding	chr20:56793550-56803709	ENSG00000232436.1	RP11-103C3.1.1	lncRNA	chr1:221681900-221684321	ENSG00000207743.1	MIR495	miRNA	chr14:101500091-101500173
ENSG00000124227.4	ANKRD60	coding	chr20:56793550-56803709	ENSG00000236885.1	AC018731.3.1	lncRNA	chr2:151974468-152042723	ENSG00000207743.1	MIR495	miRNA	chr14:101500091-101500173
ENSG00000211879.1	TRAJ10	coding	chr14:23002444-23002508	ENSG00000253740.1	KB-1083B1.1.1	lncRNA	chr8:101630808-101632221	ENSG00000207656.1	MIR489	miRNA	chr7:93113247-93113331
ENSG00000211879.1	TRAJ10	coding	chr14:23002444-23002508	ENSG00000253740.1	KB-1083B1.1.1	lncRNA	chr8:101630808-101632221	ENSG00000207734.1	MIR517A	miRNA	chr19:54215521-54215608
ENSG00000255378.1	AC084121.16.1	coding	chr8:7636112-7638935	ENSG00000253740.1	KB-1083B1.1.1	lncRNA	chr8:101630808-101632221	ENSG00000207656.1	MIR489	miRNA	chr7:93113247-93113331
ENSG00000176555.1	OR4S1	coding	chr11:48327774-48328704	ENSG00000253740.1	KB-1083B1.1.1	lncRNA	chr8:101630808-101632221	ENSG00000207656.1	MIR489	miRNA	chr7:93113247-93113331
ENSG00000203795.2	FAM24A	coding	chr10:124670216-124672627	ENSG00000253740.1	KB-1083B1.1.1	lncRNA	chr8:101630808-101632221	ENSG00000207656.1	MIR489	miRNA	chr7:93113247-93113331
ENSG00000181761.5	OR8H3	coding	chr11:55889848-55890787	ENSG00000253740.1	KB-1083B1.1.1	lncRNA	chr8:101630808-101632221	ENSG00000207656.1	MIR489	miRNA	chr7:93113247-93113331
ENSG00000187170.4	LCE4A	coding	chr1:152680635-152681967	ENSG00000253740.1	KB-1083B1.1.1	lncRNA	chr8:101630808-101632221	ENSG00000221739.1	MIR1203	miRNA	chr17:46233788-46233873
ENSG00000176555.1	OR4S1	coding	chr11:48327774-48328704	ENSG00000253740.1	KB-1083B1.1.1	lncRNA	chr8:101630808-101632221	ENSG00000207706.1	MIR518F	miRNA	chr19:54203268-54203355
ENSG00000176555.1	OR4S1	coding	chr11:48327774-48328704	ENSG00000253740.1	KB-1083B1.1.1	lncRNA	chr8:101630808-101632221	ENSG00000207734.1	MIR517A	miRNA	chr19:54215521-54215608
ENSG00000226907.3	CT45A6	coding	chrX:134961633-134971244	ENSG00000253740.1	KB-1083B1.1.1	lncRNA	chr8:101630808-101632221	ENSG00000207706.1	MIR518F	miRNA	chr19:54203268-54203355
ENSG00000211879.1	TRAJ10	coding	chr14:23002444-23002508	ENSG00000241328.1	RP11-331K15.1.1	lncRNA	chr3:86531092-86546146	ENSG00000212044.1	MIR548U	miRNA	chr1:149323330-149323422
ENSG00000211879.1	TRAJ10	coding	chr14:23002444-23002508	ENSG00000241328.1	RP11-331K15.1.1	lncRNA	chr3:86531092-86546146	ENSG00000207656.1	MIR489	miRNA	chr7:93113247-93113331
ENSG00000211879.1	TRAJ10	coding	chr14:23002444-23002508	ENSG00000241328.1	RP11-331K15.1.1	lncRNA	chr3:86531092-86546146	ENSG00000207974.1	MIR557	miRNA	chr1:168344761-168344859
ENSG00000211879.1	TRAJ10	coding	chr14:23002444-23002508	ENSG00000241328.1	RP11-331K15.1.1	lncRNA	chr3:86531092-86546146	ENSG00000207797.1	MIR187	miRNA	chr18:33484780-33484889
ENSG00000211879.1	TRAJ10	coding	chr14:23002444-23002508	ENSG00000241328.1	RP11-331K15.1.1	lncRNA	chr3:86531092-86546146	ENSG00000199030.1	MIRLET7C	miRNA	chr21:17912142-17912236
ENSG00000211879.1	TRAJ10	coding	chr14:23002444-23002508	ENSG00000241328.1	RP11-331K15.1.1	lncRNA	chr3:86531092-86546146	ENSG00000207743.1	MIR495	miRNA	chr14:101500091-101500173
ENSG00000211879.1	TRAJ10	coding	chr14:23002444-23002508	ENSG00000241328.1	RP11-331K15.1.1	lncRNA	chr3:86531092-86546146	ENSG00000199102.1	MIR302C	miRNA	chr4:113569518-113569586
ENSG00000211879.1	TRAJ10	coding	chr14:23002444-23002508	ENSG00000241328.1	RP11-331K15.1.1	lncRNA	chr3:86531092-86546146	ENSG00000221025.1	MIR1250	miRNA	chr17:79106995-79107108
ENSG00000181718.4	OR5T2	coding	chr11:55999489-56000737	ENSG00000241328.1	RP11-331K15.1.1	lncRNA	chr3:86531092-86546146	ENSG00000212044.1	MIR548U	miRNA	chr1:149323330-149323422
ENSG00000204662.2	CST9LP1	coding	chr20:23528400-23531289	ENSG00000241328.1	RP11-331K15.1.1	lncRNA	chr3:86531092-86546146	ENSG00000199030.1	MIRLET7C	miRNA	chr21:17912142-17912236
ENSG00000261421.1	RP11-22D3.1.1	coding	chr16:49193418-49195934	ENSG00000241328.1	RP11-331K15.1.1	lncRNA	chr3:86531092-86546146	ENSG00000207737.1	MIR181B2	miRNA	chr9:127455988-127456077
ENSG00000261421.1	RP11-22D3.1.1	coding	chr16:49193418-49195934	ENSG00000241328.1	RP11-331K15.1.1	lncRNA	chr3:86531092-86546146	ENSG00000211580.1	MIR769	miRNA	chr19:46522189-46522307
ENSG00000183706.4	OR4N4	coding	chr15:22382381-22383507	ENSG00000241328.1	RP11-331K15.1.1	lncRNA	chr3:86531092-86546146	ENSG00000207656.1	MIR489	miRNA	chr7:93113247-93113331
ENSG00000181958.3	OR4A15	coding	chr11:55135359-55136394	ENSG00000241328.1	RP11-331K15.1.1	lncRNA	chr3:86531092-86546146	ENSG00000207656.1	MIR489	miRNA	chr7:93113247-93113331
ENSG00000172148.2	OR7A2P	coding	chr19:14974597-14975527	ENSG00000241328.1	RP11-331K15.1.1	lncRNA	chr3:86531092-86546146	ENSG00000207656.1	MIR489	miRNA	chr7:93113247-93113331
ENSG00000187238.5	LCE3B	coding	chr1:152586286-152586574	ENSG00000241328.1	RP11-331K15.1.1	lncRNA	chr3:86531092-86546146	ENSG00000207974.1	MIR557	miRNA	chr1:168344761-168344859
ENSG00000172769.2	OR5B3	coding	chr11:58169936-58170882	ENSG00000241328.1	RP11-331K15.1.1	lncRNA	chr3:86531092-86546146	ENSG00000207974.1	MIR557	miRNA	chr1:168344761-168344859
ENSG00000255482.1	RP11-315O6.2.1	coding	chr11:102337985-102369532	ENSG00000241328.1	RP11-331K15.1.1	lncRNA	chr3:86531092-86546146	ENSG00000207797.1	MIR187	miRNA	chr18:33484780-33484889
ENSG00000187170.4	LCE4A	coding	chr1:152680635-152681967	ENSG00000241328.1	RP11-331K15.1.1	lncRNA	chr3:86531092-86546146	ENSG00000207797.1	MIR187	miRNA	chr18:33484780-33484889
ENSG00000185775.9	FAM75A6	coding	chr9:43624506-43630730	ENSG00000241328.1	RP11-331K15.1.1	lncRNA	chr3:86531092-86546146	ENSG00000199030.1	MIRLET7C	miRNA	chr21:17912142-17912236
ENSG00000187170.4	LCE4A	coding	chr1:152680635-152681967	ENSG00000241328.1	RP11-331K15.1.1	lncRNA	chr3:86531092-86546146	ENSG00000199030.1	MIRLET7C	miRNA	chr21:17912142-17912236
ENSG00000187238.5	LCE3B	coding	chr1:152586286-152586574	ENSG00000241328.1	RP11-331K15.1.1	lncRNA	chr3:86531092-86546146	ENSG00000199102.1	MIR302C	miRNA	chr4:113569518-113569586
ENSG00000183706.4	OR4N4	coding	chr15:22382381-22383507	ENSG00000241328.1	RP11-331K15.1.1	lncRNA	chr3:86531092-86546146	ENSG00000207743.1	MIR495	miRNA	chr14:101500091-101500173
ENSG00000181961.2	OR4A16	coding	chr11:55110626-55111707	ENSG00000241328.1	RP11-331K15.1.1	lncRNA	chr3:86531092-86546146	ENSG00000199102.1	MIR302C	miRNA	chr4:113569518-113569586
ENSG00000181958.3	OR4A15	coding	chr11:55135359-55136394	ENSG00000241328.1	RP11-331K15.1.1	lncRNA	chr3:86531092-86546146	ENSG00000221025.1	MIR1250	miRNA	chr17:79106995-79107108
ENSG00000255482.1	RP11-315O6.2.1	coding	chr11:102337985-102369532	ENSG00000241328.1	RP11-331K15.1.1	lncRNA	chr3:86531092-86546146	ENSG00000211580.1	MIR769	miRNA	chr19:46522189-46522307
ENSG00000187170.4	LCE4A	coding	chr1:152680635-152681967	ENSG00000241328.1	RP11-331K15.1.1	lncRNA	chr3:86531092-86546146	ENSG00000207737.1	MIR181B2	miRNA	chr9:127455988-127456077
ENSG00000172769.2	OR5B3	coding	chr11:58169936-58170882	ENSG00000241328.1	RP11-331K15.1.1	lncRNA	chr3:86531092-86546146	ENSG00000199102.1	MIR302C	miRNA	chr4:113569518-113569586
ENSG00000092377.8	TBL1Y	coding	chrY:6778726-6959977	ENSG00000244968.2	LIFR-AS1	lncRNA	chr5:38556887-38671318	ENSG00000207946.1	MIR516B1	miRNA	chr19:54240098-54240188
ENSG00000092377.8	TBL1Y	coding	chrY:6778726-6959977	ENSG00000238277.1	AC068483.1.1	lncRNA	chr2:129821418-129829298	ENSG00000207974.1	MIR557	miRNA	chr1:168344761-168344859
ENSG00000092377.8	TBL1Y	coding	chrY:6778726-6959977	ENSG00000236914.3	RP11-1008C21.2.1	lncRNA	chr15:38361681-38365160	ENSG00000207946.1	MIR516B1	miRNA	chr19:54240098-54240188
ENSG00000092377.8	TBL1Y	coding	chrY:6778726-6959977	ENSG00000238277.1	AC068483.1.1	lncRNA	chr2:129821418-129829298	ENSG00000211991.1	MIR676	miRNA	chrX:69242699-69242783
ENSG00000092377.8	TBL1Y	coding	chrY:6778726-6959977	ENSG00000236733.1	RP11-203L2.4.1	lncRNA	chr9:71437318-71458191	ENSG00000211991.1	MIR676	miRNA	chrX:69242699-69242783
ENSG00000092377.8	TBL1Y	coding	chrY:6778726-6959977	ENSG00000253424.1	CTC-436K13.3.1	lncRNA	chr5:157683144-157685444	ENSG00000207838.1	MIR517C	miRNA	chr19:54244566-54244661
ENSG00000197403.2	OR6N1	coding	chr1:158735465-158736492	ENSG00000256292.1	RP11-955H22.1.1	lncRNA	chr12:127759011-127768828	ENSG00000207596.1	MIR194-2	miRNA	chr11:64658826-64658911
ENSG00000170803.4	OR2AG1	coding	chr11:6806247-6807245	ENSG00000258607.1	RP11-701B16.3.1	lncRNA	chr14:60007400-60031208	ENSG00000207810.1	MIR519E	miRNA	chr19:54183193-54183277
ENSG00000170803.4	OR2AG1	coding	chr11:6806247-6807245	ENSG00000227940.1	RP11-372M18.1.1	lncRNA	chr1:209498800-209501877	ENSG00000207587.1	MIR544A	miRNA	chr14:101514994-101515085
ENSG00000170803.4	OR2AG1	coding	chr11:6806247-6807245	ENSG00000227169.1	RP1-37J18.1.1	lncRNA	chr1:4611794-4612205	ENSG00000207587.1	MIR544A	miRNA	chr14:101514994-101515085
ENSG00000170803.4	OR2AG1	coding	chr11:6806247-6807245	ENSG00000234306.1	RP11-271F18.1.1	lncRNA	chr10:10407142-10408450	ENSG00000207587.1	MIR544A	miRNA	chr14:101514994-101515085
ENSG00000170803.4	OR2AG1	coding	chr11:6806247-6807245	ENSG00000253527.1	CTB-105L4.2.1	lncRNA	chr5:166733277-166736875	ENSG00000207587.1	MIR544A	miRNA	chr14:101514994-101515085
ENSG00000170803.4	OR2AG1	coding	chr11:6806247-6807245	ENSG00000251376.1	CTD-2313F11.2.1	lncRNA	chr5:54350255-54350968	ENSG00000207587.1	MIR544A	miRNA	chr14:101514994-101515085
ENSG00000170803.4	OR2AG1	coding	chr11:6806247-6807245	ENSG00000236356.1	AC079584.2.1	lncRNA	chr2:144557035-144577168	ENSG00000207587.1	MIR544A	miRNA	chr14:101514994-101515085
ENSG00000170803.4	OR2AG1	coding	chr11:6806247-6807245	ENSG00000232309.1	GS1-122H1.1.1	lncRNA	chr1:182096431-182097800	ENSG00000207587.1	MIR544A	miRNA	chr14:101514994-101515085
ENSG00000170803.4	OR2AG1	coding	chr11:6806247-6807245	ENSG00000234625.1	RP11-51B13.1.1	lncRNA	chr13:91739507-91741847	ENSG00000207587.1	MIR544A	miRNA	chr14:101514994-101515085
ENSG00000170803.4	OR2AG1	coding	chr11:6806247-6807245	ENSG00000235880.1	RP11-59O6.3.1	lncRNA	chr9:267965-273002	ENSG00000207587.1	MIR544A	miRNA	chr14:101514994-101515085
ENSG00000170803.4	OR2AG1	coding	chr11:6806247-6807245	ENSG00000251543.1	RP11-60A8.2.1	lncRNA	chr5:72633732-72634360	ENSG00000211991.1	MIR676	miRNA	chrX:69242699-69242783
ENSG00000170803.4	OR2AG1	coding	chr11:6806247-6807245	ENSG00000234306.1	RP11-271F18.1.1	lncRNA	chr10:10407142-10408450	ENSG00000211991.1	MIR676	miRNA	chrX:69242699-69242783
ENSG00000170803.4	OR2AG1	coding	chr11:6806247-6807245	ENSG00000248876.1	RP11-231G15.3.1	lncRNA	chr5:108806543-108807287	ENSG00000211991.1	MIR676	miRNA	chrX:69242699-69242783
ENSG00000170803.4	OR2AG1	coding	chr11:6806247-6807245	ENSG00000251376.1	CTD-2313F11.2.1	lncRNA	chr5:54350255-54350968	ENSG00000211991.1	MIR676	miRNA	chrX:69242699-69242783
ENSG00000170803.4	OR2AG1	coding	chr11:6806247-6807245	ENSG00000239664.1	RP5-857K21.3.1	lncRNA	chr1:529832-532878	ENSG00000221296.1	MIR548T	miRNA	chr4:174189304-174189386
ENSG00000170803.4	OR2AG1	coding	chr11:6806247-6807245	ENSG00000258979.1	RP11-433J8.2.1	lncRNA	chr14:97207527-97256950	ENSG00000221296.1	MIR548T	miRNA	chr4:174189304-174189386
ENSG00000170803.4	OR2AG1	coding	chr11:6806247-6807245	ENSG00000254306.1	RP11-150O12.4.1	lncRNA	chr8:37458054-37483391	ENSG00000221296.1	MIR548T	miRNA	chr4:174189304-174189386
ENSG00000170803.4	OR2AG1	coding	chr11:6806247-6807245	ENSG00000224456.1	AP003774.7.1	lncRNA	chr11:64177547-64187687	ENSG00000221296.1	MIR548T	miRNA	chr4:174189304-174189386
ENSG00000170803.4	OR2AG1	coding	chr11:6806247-6807245	ENSG00000235880.1	RP11-59O6.3.1	lncRNA	chr9:267965-273002	ENSG00000221296.1	MIR548T	miRNA	chr4:174189304-174189386
ENSG00000170803.4	OR2AG1	coding	chr11:6806247-6807245	ENSG00000255558.1	CTC-497E21.5.1	lncRNA	chr11:13076161-13156386	ENSG00000207810.1	MIR519E	miRNA	chr19:54183193-54183277
ENSG00000170803.4	OR2AG1	coding	chr11:6806247-6807245	ENSG00000232309.1	GS1-122H1.1.1	lncRNA	chr1:182096431-182097800	ENSG00000207810.1	MIR519E	miRNA	chr19:54183193-54183277
ENSG00000170803.4	OR2AG1	coding	chr11:6806247-6807245	ENSG00000231253.1	RP1-302D9.2.1	lncRNA	chr22:33504514-33512280	ENSG00000207810.1	MIR519E	miRNA	chr19:54183193-54183277
ENSG00000204480.5	PRAMEF19	coding	chr1:13694888-13698405	ENSG00000226169.1	RP11-375H17.1.1	lncRNA	chr22:28112467-28117665	ENSG00000199089.2	MIR202	miRNA	chr10:135061014-135061124
ENSG00000204480.5	PRAMEF19	coding	chr1:13694888-13698405	ENSG00000253682.1	RP11-700E23.2.1	lncRNA	chr8:93415772-93425873	ENSG00000199089.2	MIR202	miRNA	chr10:135061014-135061124
ENSG00000204480.5	PRAMEF19	coding	chr1:13694888-13698405	ENSG00000259914.1	RP11-298D21.2.1	lncRNA	chr16:83759280-83759982	ENSG00000199089.2	MIR202	miRNA	chr10:135061014-135061124
ENSG00000204480.5	PRAMEF19	coding	chr1:13694888-13698405	ENSG00000254861.1	RP11-945A11.2.1	lncRNA	chr11:23782875-23826144	ENSG00000199089.2	MIR202	miRNA	chr10:135061014-135061124
ENSG00000204480.5	PRAMEF19	coding	chr1:13694888-13698405	ENSG00000236543.1	RP11-98L5.5.1	lncRNA	chr9:138506141-138507354	ENSG00000199089.2	MIR202	miRNA	chr10:135061014-135061124
ENSG00000204480.5	PRAMEF19	coding	chr1:13694888-13698405	ENSG00000261569.1	RP11-586K12.11.1	lncRNA	chr16:32660513-32675277	ENSG00000199089.2	MIR202	miRNA	chr10:135061014-135061124
ENSG00000204480.5	PRAMEF19	coding	chr1:13694888-13698405	ENSG00000226487.1	RP4-749H3.2.1	lncRNA	chr1:20738796-20739746	ENSG00000199089.2	MIR202	miRNA	chr10:135061014-135061124
ENSG00000204480.5	PRAMEF19	coding	chr1:13694888-13698405	ENSG00000236356.1	AC079584.2.1	lncRNA	chr2:144557035-144577168	ENSG00000199089.2	MIR202	miRNA	chr10:135061014-135061124
ENSG00000204480.5	PRAMEF19	coding	chr1:13694888-13698405	ENSG00000228159.1	AP001465.5.1	lncRNA	chr21:14918353-14930782	ENSG00000199089.2	MIR202	miRNA	chr10:135061014-135061124
ENSG00000204480.5	PRAMEF19	coding	chr1:13694888-13698405	ENSG00000227743.1	RP4-745K6.1.1	lncRNA	chr7:121283387-121290414	ENSG00000199089.2	MIR202	miRNA	chr10:135061014-135061124
ENSG00000204480.5	PRAMEF19	coding	chr1:13694888-13698405	ENSG00000251567.1	RP11-775H9.2.1	lncRNA	chr4:137039829-137316626	ENSG00000199089.2	MIR202	miRNA	chr10:135061014-135061124
ENSG00000204480.5	PRAMEF19	coding	chr1:13694888-13698405	ENSG00000254822.1	RP11-375D13.3.1	lncRNA	chr11:41898183-41898628	ENSG00000199089.2	MIR202	miRNA	chr10:135061014-135061124
ENSG00000204480.5	PRAMEF19	coding	chr1:13694888-13698405	ENSG00000232590.1	RP11-128I7.1.1	lncRNA	chr9:76188530-76194414	ENSG00000221783.1	MIR1183	miRNA	chr7:21510675-21510764
ENSG00000204480.5	PRAMEF19	coding	chr1:13694888-13698405	ENSG00000231986.1	AP000474.1.1	lncRNA	chr21:25261113-25262857	ENSG00000221634.1	MIR1276	miRNA	chr15:86313726-86313809
ENSG00000204480.5	PRAMEF19	coding	chr1:13694888-13698405	ENSG00000229306.1	AP001464.4.1	lncRNA	chr21:14371996-14389013	ENSG00000212044.1	MIR548U	miRNA	chr1:149323330-149323422
ENSG00000204480.5	PRAMEF19	coding	chr1:13694888-13698405	ENSG00000233193.1	AC005324.7.1	lncRNA	chr17:15664927-15667083	ENSG00000207838.1	MIR517C	miRNA	chr19:54244566-54244661
ENSG00000204480.5	PRAMEF19	coding	chr1:13694888-13698405	ENSG00000261009.1	RP11-1437A8.5.1	lncRNA	chr16:33271713-33274156	ENSG00000211582.1	MIR758	miRNA	chr14:101492356-101492444
ENSG00000204480.5	PRAMEF19	coding	chr1:13694888-13698405	ENSG00000248518.1	RP11-231C18.2.1	lncRNA	chr4:55242168-55242919	ENSG00000207587.1	MIR544A	miRNA	chr14:101514994-101515085
ENSG00000204480.5	PRAMEF19	coding	chr1:13694888-13698405	ENSG00000248363.1	CTC-261N6.1.1	lncRNA	chr5:85649620-85664672	ENSG00000207587.1	MIR544A	miRNA	chr14:101514994-101515085
ENSG00000204480.5	PRAMEF19	coding	chr1:13694888-13698405	ENSG00000228618.1	AC012462.3.1	lncRNA	chr2:216341389-216344971	ENSG00000207587.1	MIR544A	miRNA	chr14:101514994-101515085
ENSG00000204480.5	PRAMEF19	coding	chr1:13694888-13698405	ENSG00000232964.1	RP11-543E8.1.1	lncRNA	chr1:230728405-230731329	ENSG00000207587.1	MIR544A	miRNA	chr14:101514994-101515085
ENSG00000204480.5	PRAMEF19	coding	chr1:13694888-13698405	ENSG00000234207.1	AC096570.2.1	lncRNA	chr2:22600465-22704876	ENSG00000207587.1	MIR544A	miRNA	chr14:101514994-101515085
ENSG00000204480.5	PRAMEF19	coding	chr1:13694888-13698405	ENSG00000236356.1	AC079584.2.1	lncRNA	chr2:144557035-144577168	ENSG00000207587.1	MIR544A	miRNA	chr14:101514994-101515085
ENSG00000204480.5	PRAMEF19	coding	chr1:13694888-13698405	ENSG00000256259.1	RP11-366L20.4.1	lncRNA	chr12:66421504-66424846	ENSG00000207987.1	MIR518E	miRNA	chr19:54233091-54233179
ENSG00000204480.5	PRAMEF19	coding	chr1:13694888-13698405	ENSG00000249052.1	RP11-354O24.1.1	lncRNA	chr4:92809036-92825486	ENSG00000207987.1	MIR518E	miRNA	chr19:54233091-54233179
ENSG00000204480.5	PRAMEF19	coding	chr1:13694888-13698405	ENSG00000261790.1	AC005606.14.1	lncRNA	chr16:2034877-2040358	ENSG00000199102.1	MIR302C	miRNA	chr4:113569518-113569586
ENSG00000204480.5	PRAMEF19	coding	chr1:13694888-13698405	ENSG00000230109.1	RP11-275N1.1.1	lncRNA	chr10:21629161-21661879	ENSG00000207797.1	MIR187	miRNA	chr18:33484780-33484889
ENSG00000204480.5	PRAMEF19	coding	chr1:13694888-13698405	ENSG00000237119.1	RP11-305P22.5.1	lncRNA	chr20:61669362-61685215	ENSG00000207797.1	MIR187	miRNA	chr18:33484780-33484889
ENSG00000204480.5	PRAMEF19	coding	chr1:13694888-13698405	ENSG00000227743.1	RP4-745K6.1.1	lncRNA	chr7:121283387-121290414	ENSG00000207797.1	MIR187	miRNA	chr18:33484780-33484889
ENSG00000204480.5	PRAMEF19	coding	chr1:13694888-13698405	ENSG00000257787.1	RP11-20L19.1.1	lncRNA	chr12:91203052-91204457	ENSG00000253030.1	MIR2116	miRNA	chr15:59463381-59463461
ENSG00000204480.5	PRAMEF19	coding	chr1:13694888-13698405	ENSG00000240056.2	RP11-349J5.2.1	lncRNA	chr6:135262529-135263588	ENSG00000207767.1	MIR516A1	miRNA	chr19:54259994-54260084
ENSG00000204480.5	PRAMEF19	coding	chr1:13694888-13698405	ENSG00000238004.1	AC009227.3.1	lncRNA	chr2:155316368-155317332	ENSG00000221783.1	MIR1183	miRNA	chr7:21510675-21510764
ENSG00000204480.5	PRAMEF19	coding	chr1:13694888-13698405	ENSG00000249145.1	RP11-774O3.2.1	lncRNA	chr4:8321902-8325590	ENSG00000199102.1	MIR302C	miRNA	chr4:113569518-113569586
ENSG00000204480.5	PRAMEF19	coding	chr1:13694888-13698405	ENSG00000251176.1	RP11-97E7.1.1	lncRNA	chr4:172474150-172485418	ENSG00000211582.1	MIR758	miRNA	chr14:101492356-101492444
ENSG00000204480.5	PRAMEF19	coding	chr1:13694888-13698405	ENSG00000234595.1	AC013733.3.1	lncRNA	chr2:182547839-182550434	ENSG00000211582.1	MIR758	miRNA	chr14:101492356-101492444
ENSG00000204480.5	PRAMEF19	coding	chr1:13694888-13698405	ENSG00000251041.1	CTD-2275D24.1.1	lncRNA	chr5:73617455-73635977	ENSG00000211582.1	MIR758	miRNA	chr14:101492356-101492444
ENSG00000204480.5	PRAMEF19	coding	chr1:13694888-13698405	ENSG00000250955.1	AC008592.7.1	lncRNA	chr5:95300702-95322015	ENSG00000211582.1	MIR758	miRNA	chr14:101492356-101492444
ENSG00000204480.5	PRAMEF19	coding	chr1:13694888-13698405	ENSG00000226134.1	RP11-120E13.1.1	lncRNA	chr13:98327264-98330217	ENSG00000211582.1	MIR758	miRNA	chr14:101492356-101492444
ENSG00000204480.5	PRAMEF19	coding	chr1:13694888-13698405	ENSG00000249513.2	RP11-404I7.1.1	lncRNA	chr4:133906664-133909832	ENSG00000207869.1	MIR498	miRNA	chr19:54177450-54177574
ENSG00000204480.5	PRAMEF19	coding	chr1:13694888-13698405	ENSG00000230627.1	RP1-155D22.1.1	lncRNA	chr6:164529651-164530726	ENSG00000207869.1	MIR498	miRNA	chr19:54177450-54177574
ENSG00000204480.5	PRAMEF19	coding	chr1:13694888-13698405	ENSG00000254822.1	RP11-375D13.3.1	lncRNA	chr11:41898183-41898628	ENSG00000207869.1	MIR498	miRNA	chr19:54177450-54177574
ENSG00000204480.5	PRAMEF19	coding	chr1:13694888-13698405	ENSG00000248363.1	CTC-261N6.1.1	lncRNA	chr5:85649620-85664672	ENSG00000199102.1	MIR302C	miRNA	chr4:113569518-113569586
ENSG00000204480.5	PRAMEF19	coding	chr1:13694888-13698405	ENSG00000228618.1	AC012462.3.1	lncRNA	chr2:216341389-216344971	ENSG00000239070.1	MIR1299	miRNA	chr9:69002238-69002321
ENSG00000204480.5	PRAMEF19	coding	chr1:13694888-13698405	ENSG00000255300.1	RP11-148I19.1.1	lncRNA	chr11:42014934-42185401	ENSG00000221783.1	MIR1183	miRNA	chr7:21510675-21510764
ENSG00000204480.5	PRAMEF19	coding	chr1:13694888-13698405	ENSG00000253583.1	RP11-573J24.1.1	lncRNA	chr8:64498557-64501966	ENSG00000221634.1	MIR1276	miRNA	chr15:86313726-86313809
ENSG00000204480.5	PRAMEF19	coding	chr1:13694888-13698405	ENSG00000229306.1	AP001464.4.1	lncRNA	chr21:14371996-14389013	ENSG00000221634.1	MIR1276	miRNA	chr15:86313726-86313809
ENSG00000204480.5	PRAMEF19	coding	chr1:13694888-13698405	ENSG00000255628.1	RP11-313F23.3.1	lncRNA	chr12:34302773-34315173	ENSG00000221634.1	MIR1276	miRNA	chr15:86313726-86313809
ENSG00000204480.5	PRAMEF19	coding	chr1:13694888-13698405	ENSG00000226134.1	RP11-120E13.1.1	lncRNA	chr13:98327264-98330217	ENSG00000221634.1	MIR1276	miRNA	chr15:86313726-86313809
ENSG00000204480.5	PRAMEF19	coding	chr1:13694888-13698405	ENSG00000232299.1	RP1-105O18.1.1	lncRNA	chr6:112797739-112802838	ENSG00000221634.1	MIR1276	miRNA	chr15:86313726-86313809
ENSG00000204480.5	PRAMEF19	coding	chr1:13694888-13698405	ENSG00000231791.1	RP11-382D12.1.1	lncRNA	chr1:184298204-184301960	ENSG00000207738.1	MIR520C	miRNA	chr19:54210706-54210793
ENSG00000204480.5	PRAMEF19	coding	chr1:13694888-13698405	ENSG00000233415.1	RP11-101E14.3.1	lncRNA	chr20:38660226-38672531	ENSG00000199102.1	MIR302C	miRNA	chr4:113569518-113569586
ENSG00000204480.5	PRAMEF19	coding	chr1:13694888-13698405	ENSG00000256469.1	RP11-856F16.2.1	lncRNA	chr11:94607216-94658686	ENSG00000199102.1	MIR302C	miRNA	chr4:113569518-113569586
ENSG00000204480.5	PRAMEF19	coding	chr1:13694888-13698405	ENSG00000230109.1	RP11-275N1.1.1	lncRNA	chr10:21629161-21661879	ENSG00000199102.1	MIR302C	miRNA	chr4:113569518-113569586
ENSG00000204480.5	PRAMEF19	coding	chr1:13694888-13698405	ENSG00000256259.1	RP11-366L20.4.1	lncRNA	chr12:66421504-66424846	ENSG00000199102.1	MIR302C	miRNA	chr4:113569518-113569586
ENSG00000204480.5	PRAMEF19	coding	chr1:13694888-13698405	ENSG00000261176.1	RP11-2L4.1.1	lncRNA	chr16:82587653-82608815	ENSG00000199102.1	MIR302C	miRNA	chr4:113569518-113569586
ENSG00000204480.5	PRAMEF19	coding	chr1:13694888-13698405	ENSG00000229306.1	AP001464.4.1	lncRNA	chr21:14371996-14389013	ENSG00000199102.1	MIR302C	miRNA	chr4:113569518-113569586
ENSG00000204480.5	PRAMEF19	coding	chr1:13694888-13698405	ENSG00000249052.1	RP11-354O24.1.1	lncRNA	chr4:92809036-92825486	ENSG00000199102.1	MIR302C	miRNA	chr4:113569518-113569586
ENSG00000204480.5	PRAMEF19	coding	chr1:13694888-13698405	ENSG00000229306.1	AP001464.4.1	lncRNA	chr21:14371996-14389013	ENSG00000207738.1	MIR520C	miRNA	chr19:54210706-54210793
ENSG00000204480.5	PRAMEF19	coding	chr1:13694888-13698405	ENSG00000228159.1	AP001465.5.1	lncRNA	chr21:14918353-14930782	ENSG00000207738.1	MIR520C	miRNA	chr19:54210706-54210793
ENSG00000204480.5	PRAMEF19	coding	chr1:13694888-13698405	ENSG00000250488.1	RP11-6C14.1.1	lncRNA	chr4:160587654-160698936	ENSG00000207738.1	MIR520C	miRNA	chr19:54210706-54210793
ENSG00000204480.5	PRAMEF19	coding	chr1:13694888-13698405	ENSG00000250761.1	RP11-711G10.1.1	lncRNA	chr5:7707914-7749878	ENSG00000207810.1	MIR519E	miRNA	chr19:54183193-54183277
ENSG00000204480.5	PRAMEF19	coding	chr1:13694888-13698405	ENSG00000230109.1	RP11-275N1.1.1	lncRNA	chr10:21629161-21661879	ENSG00000221783.1	MIR1183	miRNA	chr7:21510675-21510764
ENSG00000204480.5	PRAMEF19	coding	chr1:13694888-13698405	ENSG00000230109.1	RP11-275N1.1.1	lncRNA	chr10:21629161-21661879	ENSG00000238682.1	MIR376C	miRNA	chr14:101506016-101506102
ENSG00000204480.5	PRAMEF19	coding	chr1:13694888-13698405	ENSG00000254575.1	RP11-3G21.1.1	lncRNA	chr8:14018805-14022868	ENSG00000221063.1	MIR1296	miRNA	chr10:65132716-65132808
ENSG00000204480.5	PRAMEF19	coding	chr1:13694888-13698405	ENSG00000230968.1	AC084149.1.1	lncRNA	chr2:77899340-77900918	ENSG00000207806.1	MIR522	miRNA	chr19:54254464-54254551
ENSG00000204480.5	PRAMEF19	coding	chr1:13694888-13698405	ENSG00000230968.1	AC084149.1.1	lncRNA	chr2:77899340-77900918	ENSG00000207977.1	MIR524	miRNA	chr19:54214255-54214342
ENSG00000204480.5	PRAMEF19	coding	chr1:13694888-13698405	ENSG00000236543.1	RP11-98L5.5.1	lncRNA	chr9:138506141-138507354	ENSG00000238682.1	MIR376C	miRNA	chr14:101506016-101506102
ENSG00000204480.5	PRAMEF19	coding	chr1:13694888-13698405	ENSG00000227743.1	RP4-745K6.1.1	lncRNA	chr7:121283387-121290414	ENSG00000239070.1	MIR1299	miRNA	chr9:69002238-69002321
ENSG00000204480.5	PRAMEF19	coding	chr1:13694888-13698405	ENSG00000234752.1	RP11-428L9.1.1	lncRNA	chr10:8939951-8956559	ENSG00000221783.1	MIR1183	miRNA	chr7:21510675-21510764
ENSG00000204480.5	PRAMEF19	coding	chr1:13694888-13698405	ENSG00000248457.1	RP11-419C19.2.1	lncRNA	chr5:12914179-13032998	ENSG00000221783.1	MIR1183	miRNA	chr7:21510675-21510764
ENSG00000204480.5	PRAMEF19	coding	chr1:13694888-13698405	ENSG00000244706.2	RP11-298O21.3.1	lncRNA	chr3:167584287-167588765	ENSG00000221783.1	MIR1183	miRNA	chr7:21510675-21510764
ENSG00000204172.7	AGAP10	coding	chr10:47191843-47239738	ENSG00000251058.1	RP11-68L1.1.1	lncRNA	chr3:140179841-140181667	ENSG00000212044.1	MIR548U	miRNA	chr1:149323330-149323422
ENSG00000204172.7	AGAP10	coding	chr10:47191843-47239738	ENSG00000251058.1	RP11-68L1.1.1	lncRNA	chr3:140179841-140181667	ENSG00000207656.1	MIR489	miRNA	chr7:93113247-93113331
ENSG00000204172.7	AGAP10	coding	chr10:47191843-47239738	ENSG00000251058.1	RP11-68L1.1.1	lncRNA	chr3:140179841-140181667	ENSG00000207743.1	MIR495	miRNA	chr14:101500091-101500173
ENSG00000204172.7	AGAP10	coding	chr10:47191843-47239738	ENSG00000251058.1	RP11-68L1.1.1	lncRNA	chr3:140179841-140181667	ENSG00000199102.1	MIR302C	miRNA	chr4:113569518-113569586
ENSG00000204172.7	AGAP10	coding	chr10:47191843-47239738	ENSG00000229546.1	RP11-366O17.3.1	lncRNA	chr13:43416549-43417023	ENSG00000199089.2	MIR202	miRNA	chr10:135061014-135061124
ENSG00000204172.7	AGAP10	coding	chr10:47191843-47239738	ENSG00000226169.1	RP11-375H17.1.1	lncRNA	chr22:28112467-28117665	ENSG00000199089.2	MIR202	miRNA	chr10:135061014-135061124
ENSG00000204172.7	AGAP10	coding	chr10:47191843-47239738	ENSG00000253682.1	RP11-700E23.2.1	lncRNA	chr8:93415772-93425873	ENSG00000199089.2	MIR202	miRNA	chr10:135061014-135061124
ENSG00000204172.7	AGAP10	coding	chr10:47191843-47239738	ENSG00000259914.1	RP11-298D21.2.1	lncRNA	chr16:83759280-83759982	ENSG00000199089.2	MIR202	miRNA	chr10:135061014-135061124
ENSG00000204172.7	AGAP10	coding	chr10:47191843-47239738	ENSG00000254861.1	RP11-945A11.2.1	lncRNA	chr11:23782875-23826144	ENSG00000199089.2	MIR202	miRNA	chr10:135061014-135061124
ENSG00000204172.7	AGAP10	coding	chr10:47191843-47239738	ENSG00000236543.1	RP11-98L5.5.1	lncRNA	chr9:138506141-138507354	ENSG00000199089.2	MIR202	miRNA	chr10:135061014-135061124
ENSG00000204172.7	AGAP10	coding	chr10:47191843-47239738	ENSG00000203565.2	RP13-259N13.2.1	lncRNA	chr10:33973682-33975992	ENSG00000199089.2	MIR202	miRNA	chr10:135061014-135061124
ENSG00000204172.7	AGAP10	coding	chr10:47191843-47239738	ENSG00000250719.1	RP11-322N21.2.1	lncRNA	chr1:46641157-46642150	ENSG00000199089.2	MIR202	miRNA	chr10:135061014-135061124
ENSG00000204172.7	AGAP10	coding	chr10:47191843-47239738	ENSG00000261569.1	RP11-586K12.11.1	lncRNA	chr16:32660513-32675277	ENSG00000199089.2	MIR202	miRNA	chr10:135061014-135061124
ENSG00000204172.7	AGAP10	coding	chr10:47191843-47239738	ENSG00000226487.1	RP4-749H3.2.1	lncRNA	chr1:20738796-20739746	ENSG00000199089.2	MIR202	miRNA	chr10:135061014-135061124
ENSG00000204172.7	AGAP10	coding	chr10:47191843-47239738	ENSG00000254822.1	RP11-375D13.3.1	lncRNA	chr11:41898183-41898628	ENSG00000199089.2	MIR202	miRNA	chr10:135061014-135061124
ENSG00000204172.7	AGAP10	coding	chr10:47191843-47239738	ENSG00000232590.1	RP11-128I7.1.1	lncRNA	chr9:76188530-76194414	ENSG00000207649.1	MIR138-2	miRNA	chr16:56892429-56892513
ENSG00000204172.7	AGAP10	coding	chr10:47191843-47239738	ENSG00000244545.1	RP11-788A4.1.1	lncRNA	chr3:152365934-152368236	ENSG00000207649.1	MIR138-2	miRNA	chr16:56892429-56892513
ENSG00000204172.7	AGAP10	coding	chr10:47191843-47239738	ENSG00000223554.1	AC078851.1.1	lncRNA	chr2:140582464-140583446	ENSG00000207649.1	MIR138-2	miRNA	chr16:56892429-56892513
ENSG00000204172.7	AGAP10	coding	chr10:47191843-47239738	ENSG00000235020.1	RP11-109I13.2.1	lncRNA	chr10:18523096-18550123	ENSG00000207649.1	MIR138-2	miRNA	chr16:56892429-56892513
ENSG00000204172.7	AGAP10	coding	chr10:47191843-47239738	ENSG00000233074.1	RP11-327I22.6.1	lncRNA	chr9:43140536-43142739	ENSG00000207649.1	MIR138-2	miRNA	chr16:56892429-56892513
ENSG00000204172.7	AGAP10	coding	chr10:47191843-47239738	ENSG00000255300.1	RP11-148I19.1.1	lncRNA	chr11:42014934-42185401	ENSG00000207649.1	MIR138-2	miRNA	chr16:56892429-56892513
ENSG00000204172.7	AGAP10	coding	chr10:47191843-47239738	ENSG00000226927.1	RP11-302I18.3.1	lncRNA	chr1:220533072-220533525	ENSG00000207649.1	MIR138-2	miRNA	chr16:56892429-56892513
ENSG00000204172.7	AGAP10	coding	chr10:47191843-47239738	ENSG00000230972.1	AP001255.2.1	lncRNA	chr21:24437812-24503528	ENSG00000207649.1	MIR138-2	miRNA	chr16:56892429-56892513
ENSG00000204172.7	AGAP10	coding	chr10:47191843-47239738	ENSG00000231447.1	RP1-14D6.7.1	lncRNA	chrX:151889194-151890140	ENSG00000207649.1	MIR138-2	miRNA	chr16:56892429-56892513
ENSG00000204172.7	AGAP10	coding	chr10:47191843-47239738	ENSG00000255335.1	RP11-358H18.2.1	lncRNA	chr11:17716813-17718487	ENSG00000207649.1	MIR138-2	miRNA	chr16:56892429-56892513
ENSG00000204172.7	AGAP10	coding	chr10:47191843-47239738	ENSG00000231791.1	RP11-382D12.1.1	lncRNA	chr1:184298204-184301960	ENSG00000207649.1	MIR138-2	miRNA	chr16:56892429-56892513
ENSG00000204172.7	AGAP10	coding	chr10:47191843-47239738	ENSG00000258214.1	RP11-272B17.1.1	lncRNA	chr12:59759998-59804952	ENSG00000207649.1	MIR138-2	miRNA	chr16:56892429-56892513
ENSG00000204172.7	AGAP10	coding	chr10:47191843-47239738	ENSG00000225565.1	RP11-54A22.2.1	lncRNA	chr9:137519675-137521252	ENSG00000207649.1	MIR138-2	miRNA	chr16:56892429-56892513
ENSG00000204172.7	AGAP10	coding	chr10:47191843-47239738	ENSG00000253985.1	RP11-136K7.3.1	lncRNA	chr5:70668502-70670725	ENSG00000207649.1	MIR138-2	miRNA	chr16:56892429-56892513
ENSG00000204172.7	AGAP10	coding	chr10:47191843-47239738	ENSG00000259861.1	CTC-471C19.2.1	lncRNA	chr5:6030147-6030954	ENSG00000207649.1	MIR138-2	miRNA	chr16:56892429-56892513
ENSG00000204172.7	AGAP10	coding	chr10:47191843-47239738	ENSG00000230472.1	RP1-28O17.1.1	lncRNA	chr6:50555319-50604918	ENSG00000207649.1	MIR138-2	miRNA	chr16:56892429-56892513
ENSG00000204172.7	AGAP10	coding	chr10:47191843-47239738	ENSG00000228659.1	RP1-23K20.2.1	lncRNA	chrX:130115563-130192120	ENSG00000207649.1	MIR138-2	miRNA	chr16:56892429-56892513
ENSG00000204172.7	AGAP10	coding	chr10:47191843-47239738	ENSG00000230968.1	AC084149.1.1	lncRNA	chr2:77899340-77900918	ENSG00000207649.1	MIR138-2	miRNA	chr16:56892429-56892513
ENSG00000204172.7	AGAP10	coding	chr10:47191843-47239738	ENSG00000203565.2	RP13-259N13.2.1	lncRNA	chr10:33973682-33975992	ENSG00000207649.1	MIR138-2	miRNA	chr16:56892429-56892513
ENSG00000204172.7	AGAP10	coding	chr10:47191843-47239738	ENSG00000257787.1	RP11-20L19.1.1	lncRNA	chr12:91203052-91204457	ENSG00000207649.1	MIR138-2	miRNA	chr16:56892429-56892513
ENSG00000204172.7	AGAP10	coding	chr10:47191843-47239738	ENSG00000233070.1	ZFY-AS1	lncRNA	chrY:2834884-2870667	ENSG00000207649.1	MIR138-2	miRNA	chr16:56892429-56892513
ENSG00000204172.7	AGAP10	coding	chr10:47191843-47239738	ENSG00000241669.1	RP11-576M8.2.1	lncRNA	chr3:167110583-167126307	ENSG00000207649.1	MIR138-2	miRNA	chr16:56892429-56892513
ENSG00000204172.7	AGAP10	coding	chr10:47191843-47239738	ENSG00000253956.1	RP11-211F2.1.1	lncRNA	chr8:111346971-111361836	ENSG00000207649.1	MIR138-2	miRNA	chr16:56892429-56892513
ENSG00000204172.7	AGAP10	coding	chr10:47191843-47239738	ENSG00000249613.1	RP13-612N21.1.1	lncRNA	chr4:107354780-107374605	ENSG00000207649.1	MIR138-2	miRNA	chr16:56892429-56892513
ENSG00000204172.7	AGAP10	coding	chr10:47191843-47239738	ENSG00000227016.1	RP11-262K1.1.1	lncRNA	chr1:73240953-73256963	ENSG00000207649.1	MIR138-2	miRNA	chr16:56892429-56892513
ENSG00000204172.7	AGAP10	coding	chr10:47191843-47239738	ENSG00000227185.1	RP11-544D21.1.1	lncRNA	chr1:239433024-239461237	ENSG00000207649.1	MIR138-2	miRNA	chr16:56892429-56892513
ENSG00000204172.7	AGAP10	coding	chr10:47191843-47239738	ENSG00000226218.1	AC079163.1.1	lncRNA	chr2:146358474-146360991	ENSG00000207649.1	MIR138-2	miRNA	chr16:56892429-56892513
ENSG00000204172.7	AGAP10	coding	chr10:47191843-47239738	ENSG00000224192.2	RP11-259P1.1.1	lncRNA	chr22:26637296-26650058	ENSG00000207649.1	MIR138-2	miRNA	chr16:56892429-56892513
ENSG00000204172.7	AGAP10	coding	chr10:47191843-47239738	ENSG00000229483.1	LINC00362	lncRNA	chr13:23743973-23744736	ENSG00000207649.1	MIR138-2	miRNA	chr16:56892429-56892513
ENSG00000204172.7	AGAP10	coding	chr10:47191843-47239738	ENSG00000234752.1	RP11-428L9.1.1	lncRNA	chr10:8939951-8956559	ENSG00000207649.1	MIR138-2	miRNA	chr16:56892429-56892513
ENSG00000204172.7	AGAP10	coding	chr10:47191843-47239738	ENSG00000243583.1	RP4-669B10.3.1	lncRNA	chr7:143651936-143694405	ENSG00000207649.1	MIR138-2	miRNA	chr16:56892429-56892513
ENSG00000204172.7	AGAP10	coding	chr10:47191843-47239738	ENSG00000250078.1	RP11-577G20.2.1	lncRNA	chr4:59428329-59431287	ENSG00000207649.1	MIR138-2	miRNA	chr16:56892429-56892513
ENSG00000204172.7	AGAP10	coding	chr10:47191843-47239738	ENSG00000231182.1	RP11-423O2.7.1	lncRNA	chr1:142950834-142956716	ENSG00000207649.1	MIR138-2	miRNA	chr16:56892429-56892513
ENSG00000204172.7	AGAP10	coding	chr10:47191843-47239738	ENSG00000232200.1	RP4-564O4.1.1	lncRNA	chr20:24278220-24298722	ENSG00000207649.1	MIR138-2	miRNA	chr16:56892429-56892513
ENSG00000204172.7	AGAP10	coding	chr10:47191843-47239738	ENSG00000234519.1	RP3-495K2.1.1	lncRNA	chr6:169467912-169469519	ENSG00000207649.1	MIR138-2	miRNA	chr16:56892429-56892513
ENSG00000204172.7	AGAP10	coding	chr10:47191843-47239738	ENSG00000248457.1	RP11-419C19.2.1	lncRNA	chr5:12914179-13032998	ENSG00000207649.1	MIR138-2	miRNA	chr16:56892429-56892513
ENSG00000204172.7	AGAP10	coding	chr10:47191843-47239738	ENSG00000240973.1	RP11-458K10.2.1	lncRNA	chr7:115319398-115322672	ENSG00000207649.1	MIR138-2	miRNA	chr16:56892429-56892513
ENSG00000204172.7	AGAP10	coding	chr10:47191843-47239738	ENSG00000250855.1	RP11-269F21.1.1	lncRNA	chr4:112723956-112761042	ENSG00000207649.1	MIR138-2	miRNA	chr16:56892429-56892513
ENSG00000204172.7	AGAP10	coding	chr10:47191843-47239738	ENSG00000260387.1	RP11-463O9.6.1	lncRNA	chr16:86669933-86670751	ENSG00000207649.1	MIR138-2	miRNA	chr16:56892429-56892513
ENSG00000204172.7	AGAP10	coding	chr10:47191843-47239738	ENSG00000250418.1	RP11-503D12.1.1	lncRNA	chr5:44698532-44700910	ENSG00000207649.1	MIR138-2	miRNA	chr16:56892429-56892513
ENSG00000204172.7	AGAP10	coding	chr10:47191843-47239738	ENSG00000232299.1	RP1-105O18.1.1	lncRNA	chr6:112797739-112802838	ENSG00000207649.1	MIR138-2	miRNA	chr16:56892429-56892513
ENSG00000204172.7	AGAP10	coding	chr10:47191843-47239738	ENSG00000237802.2	FAM197Y6	lncRNA	chrY:9225730-9233636	ENSG00000207649.1	MIR138-2	miRNA	chr16:56892429-56892513
ENSG00000204172.7	AGAP10	coding	chr10:47191843-47239738	ENSG00000229297.1	RP11-540H22.2.1	lncRNA	chr9:109346422-109354233	ENSG00000207649.1	MIR138-2	miRNA	chr16:56892429-56892513
ENSG00000204172.7	AGAP10	coding	chr10:47191843-47239738	ENSG00000233945.1	RP11-344L13.2.1	lncRNA	chr10:85432161-85435195	ENSG00000207649.1	MIR138-2	miRNA	chr16:56892429-56892513
ENSG00000204172.7	AGAP10	coding	chr10:47191843-47239738	ENSG00000258532.1	RP11-353P15.1.1	lncRNA	chr14:84373215-84381394	ENSG00000207649.1	MIR138-2	miRNA	chr16:56892429-56892513
ENSG00000204172.7	AGAP10	coding	chr10:47191843-47239738	ENSG00000223381.1	RP11-655H13.2.1	lncRNA	chr10:110470275-110599121	ENSG00000207649.1	MIR138-2	miRNA	chr16:56892429-56892513
ENSG00000204172.7	AGAP10	coding	chr10:47191843-47239738	ENSG00000231949.1	RP4-591L5.2.1	lncRNA	chr1:30888671-30893955	ENSG00000207649.1	MIR138-2	miRNA	chr16:56892429-56892513
ENSG00000204172.7	AGAP10	coding	chr10:47191843-47239738	ENSG00000233866.1	LA16c-4G1.3.1	lncRNA	chr22:16062156-16063236	ENSG00000207649.1	MIR138-2	miRNA	chr16:56892429-56892513
ENSG00000204172.7	AGAP10	coding	chr10:47191843-47239738	ENSG00000228048.1	RP11-598C10.1.1	lncRNA	chr10:57265978-57272977	ENSG00000207649.1	MIR138-2	miRNA	chr16:56892429-56892513
ENSG00000204172.7	AGAP10	coding	chr10:47191843-47239738	ENSG00000228675.1	AC006482.1.1	lncRNA	chr7:17719172-17720283	ENSG00000207649.1	MIR138-2	miRNA	chr16:56892429-56892513
ENSG00000204172.7	AGAP10	coding	chr10:47191843-47239738	ENSG00000244706.2	RP11-298O21.3.1	lncRNA	chr3:167584287-167588765	ENSG00000207649.1	MIR138-2	miRNA	chr16:56892429-56892513
ENSG00000204172.7	AGAP10	coding	chr10:47191843-47239738	ENSG00000250524.1	RP11-730N24.2.1	lncRNA	chr5:24882051-24885570	ENSG00000207649.1	MIR138-2	miRNA	chr16:56892429-56892513
ENSG00000204172.7	AGAP10	coding	chr10:47191843-47239738	ENSG00000253879.1	RP11-379I19.3.1	lncRNA	chr8:60513936-60526334	ENSG00000207649.1	MIR138-2	miRNA	chr16:56892429-56892513
ENSG00000204172.7	AGAP10	coding	chr10:47191843-47239738	ENSG00000231986.1	AP000474.1.1	lncRNA	chr21:25261113-25262857	ENSG00000221634.1	MIR1276	miRNA	chr15:86313726-86313809
ENSG00000204172.7	AGAP10	coding	chr10:47191843-47239738	ENSG00000229306.1	AP001464.4.1	lncRNA	chr21:14371996-14389013	ENSG00000212044.1	MIR548U	miRNA	chr1:149323330-149323422
ENSG00000204172.7	AGAP10	coding	chr10:47191843-47239738	ENSG00000261009.1	RP11-1437A8.5.1	lncRNA	chr16:33271713-33274156	ENSG00000207813.1	MIR605	miRNA	chr10:53059332-53059415
ENSG00000204172.7	AGAP10	coding	chr10:47191843-47239738	ENSG00000261009.1	RP11-1437A8.5.1	lncRNA	chr16:33271713-33274156	ENSG00000221628.1	MIR1302-4	miRNA	chr2:208133998-208134148
ENSG00000204172.7	AGAP10	coding	chr10:47191843-47239738	ENSG00000261009.1	RP11-1437A8.5.1	lncRNA	chr16:33271713-33274156	ENSG00000207752.1	MIR199A1	miRNA	chr19:10928101-10928172
ENSG00000204172.7	AGAP10	coding	chr10:47191843-47239738	ENSG00000227169.1	RP1-37J18.1.1	lncRNA	chr1:4611794-4612205	ENSG00000207587.1	MIR544A	miRNA	chr14:101514994-101515085
ENSG00000204172.7	AGAP10	coding	chr10:47191843-47239738	ENSG00000228618.1	AC012462.3.1	lncRNA	chr2:216341389-216344971	ENSG00000207587.1	MIR544A	miRNA	chr14:101514994-101515085
ENSG00000204172.7	AGAP10	coding	chr10:47191843-47239738	ENSG00000251506.1	CTD-2247C11.2.1	lncRNA	chr5:4967876-4970538	ENSG00000207587.1	MIR544A	miRNA	chr14:101514994-101515085
ENSG00000204172.7	AGAP10	coding	chr10:47191843-47239738	ENSG00000258402.1	RP11-516J2.1.1	lncRNA	chr14:76747285-76776409	ENSG00000207587.1	MIR544A	miRNA	chr14:101514994-101515085
ENSG00000204172.7	AGAP10	coding	chr10:47191843-47239738	ENSG00000253985.1	RP11-136K7.3.1	lncRNA	chr5:70668502-70670725	ENSG00000207587.1	MIR544A	miRNA	chr14:101514994-101515085
ENSG00000204172.7	AGAP10	coding	chr10:47191843-47239738	ENSG00000231428.1	RP11-472K17.1.1	lncRNA	chr13:110705631-110707299	ENSG00000207587.1	MIR544A	miRNA	chr14:101514994-101515085
ENSG00000204172.7	AGAP10	coding	chr10:47191843-47239738	ENSG00000231243.1	RP11-134J21.1.1	lncRNA	chr3:38865392-38866793	ENSG00000207587.1	MIR544A	miRNA	chr14:101514994-101515085
[truncated: 12,417 more rows]
